# Supplementary material for: Molecular pathway activation features of pediatric acute myeloid leukemia (AML) and acute lymphoblast leukemia (ALL) cells
Source: Aging (Albany NY). 2016 Nov 19;8(11):2936–46. doi: 10.18632/aging.101102 (PMC5182073; doi:10.18632/aging.101102)
Supplement: Supplementary file 2 [file aging-08-2936-s002.xlsx]

## Sheet: Возраста
Supplementary dataset 1. List of the pediatric leukemia patients and normal blood donors investigated in this study.
Patient ID	Diagnosis	Relapse	Age, y.o.
AML-1	AML	yes	9
AML-2	AML	no	13
AML-3	AML	no	1
AML-4	AML	no	7
AML-5	AML	no	1
AML-6	AML	no	15
AML-7	AML	no	3
ALL-1	ALL	no	1
ALL-2	ALL	no	3
ALL-3	ALL	no	14
ALL-4	ALL	no	4
ALL-5	ALL	no	5
ALL-6	ALL	no	5
ALL-7	ALL	no	8
Norm-1	Normal	no	12
Norm-2	Normal	no	10
Norm-3	Normal	no	13
