# Supplementary material for: Molecular pathway activation features of pediatric acute myeloid leukemia (AML) and acute lymphoblast leukemia (ALL) cells
Source: Aging (Albany NY). 2016 Nov 19;8(11):2936–46. doi: 10.18632/aging.101102 (PMC5182073; doi:10.18632/aging.101102)
Supplement: Supplementary file 3 [file aging-08-2936-s003.xlsx]

## Sheet: cnr. pediatric Leukemia
Gene name	AML-1	ALL-1	AML-3	Norm-1	Norm-2	Norm-3	ALL-3	AML-5	AML-6	AML-2	ALL-7	ALL-5	ALL-6	ALL-2	ALL-4	AML-4	AML-7
AATK	1.77393	1.79263	1.57182	0.981308	0.956535	1.06216	1.8919	2.26762	1.71867	1.09636	1.59618	1.57744	1.6539	1.60357	1.9183	1.53856	1.77635
ABHD12	0.558404	1.04748	0.497163	0.813854	0.888465	1.29768	1.22622	0.78873	0.762903	0.637391	0.655785	0.920065	0.786145	0.762869	0.704872	0.641249	0.894367
ABI1	0.485099	0.629658	0.359168	0.89098	1.13848	0.970542	0.890393	0.518991	0.3859	0.516098	0.278161	0.423905	0.658687	0.627282	0.679163	0.565057	0.484906
ABL1	1.63667	1.33149	1.38838	1.05734	0.796217	1.14644	1.42294	1.42887	1.16445	1.56463	0.811277	1.17162	1.38145	0.941486	1.86523	1.2667	1.25954
ACAN	1.05345	0.912955	1.32376	0.762713	0.876837	1.36045	1.09872	1.20637	0.610092	1.56535	0.432979	0.515727	0.719005	0.693199	0.766546	1.50927	0.610457
ACTA1	4.47122	1.35092	2.08311	0.802146	0.861598	1.33626	1.18542	2.62855	1.41631	2.30549	0.797641	1.29975	1.64823	2.38916	2.29727	3.69239	1.79561
ACTA2	2.06582	0.917457	1.37637	1.03129	1.0296	0.939112	0.925844	2.03205	0.716352	1.91443	0.338841	0.787572	2.07617	2.37693	3.21968	1.63462	1.3022
ACTB	1.37164	0.74769	0.951512	0.857952	1.11365	1.0284	0.911364	1.2458	0.479329	2.25794	0.279217	0.474623	1.24632	0.842576	1.13644	1.26247	0.666076
ACTC1	0.763852	1.7107	0.771445	0.426542	0.718614	1.85484	2.06899	0.635038	1.24216	0.911747	0.706718	2.75996	0.767249	0.53199	0.757469	0.797763	1.45809
ACTG1	0.881385	2.02642	1.04251	0.959003	0.690806	1.35019	2.42461	0.83199	2.76777	1.62584	1.7784	3.29003	2.03517	0.729413	1.04908	0.929467	1.79454
ACTG2	2.87272	1.24932	1.23027	0.606771	0.503838	1.88939	1.44309	0.971976	0.822526	2.47597	0.541862	2.07429	0.796246	0.853965	0.707453	1.05996	1.31732
ACTN1	1.38549	2.09859	0.917719	0.827456	0.657873	1.51467	1.9287	1.08288	2.46093	1.12516	1.62779	2.70074	0.922566	1.20874	1.1012	1.20324	1.4274
ACTN2	3.44063	2.6754	1.81339	0.104771	0.420059	2.47517	2.28933	1.75494	1.72254	1.58312	0.974137	3.77677	0.728309	0.493517	1.06462	2.39717	1.5162
ACTN3	1.1264	1.86954	0.928154	0.665801	0.734044	1.60015	1.97089	0.918418	2.0502	0.970989	1.37984	2.75543	1.01974	0.91708	1.11545	1.16908	1.7798
ACTN4	1.53894	1.40602	2.10036	0.787065	0.9948	1.21814	1.44328	1.63108	0.890425	3.03623	0.869836	0.655824	1.01953	1.02361	1.22665	1.76845	0.72805
ACVR1	2.17868	1.44532	3.12775	0.345727	1.05684	1.59743	1.70779	2.19675	0.848533	4.0362	0.957714	2.46217	0.534161	0.632155	0.654505	2.35006	1.22131
ACVR2B	5.3096	1.26651	3.42686	0.927041	0.0775009	1.99546	2.1299	3.08225	1.74335	4.32374	0.871234	2.42243	1.64978	1.4717	1.94543	3.27428	1.86402
ACVRL1	1.4279	2.42595	1.63402	0.885948	0.396229	1.71782	2.79287	1.55546	1.97579	1.77845	1.96755	4.47474	1.43676	1.48157	1.29964	1.50917	2.55031
ADAM17	3.78728	0.42045	3.52416	1.61505	0.515898	0.869051	0.446149	2.36269	0.302919	2.5549	0.239655	0.532682	1.47432	1.63338	1.48526	1.92181	1.01855
ADCY1	1.97013	1.5909	1.98286	0.892689	0.0129705	2.09434	2.59117	2.68954	1.64434	1.08504	0.894771	2.8161	2.33636	1.36158	2.82244	1.73706	2.36158
ADCY10	1.48711	0.980118	1.30338	1.02033	0.764303	1.21537	1.00323	1.37999	0.979018	0.946901	0.620381	0.979367	1.89803	1.7591	1.82464	2.0163	1.51817
ADCY2	2.27387	1.00479	1.03378	0.728186	0.658378	1.61344	1.22782	1.43072	0.963361	1.83141	0.738177	1.25402	1.63722	1.36668	1.47011	1.70819	1.24657
ADCY3	0.769667	0.852575	0.945584	0.0138521	0.0125126	2.97364	1.49647	0.831568	0.812358	0.660205	0.907259	1.71473	0.0069497	0.536939	0.00767461	0.594995	0.449303
ADCY4	1.1089	1.60926	0.863983	0.675858	0.584025	1.74012	1.96666	0.83127	1.456	0.747638	1.47473	2.52214	0.959845	1.04183	0.955829	1.23733	1.43548
ADCY5	0.790608	1.85062	1.27401	0.721216	0.431039	1.84775	2.30099	0.869073	1.92359	0.917005	1.93188	2.58237	0.838303	1.15526	0.871022	0.795745	1.23724
ADCY6	2.99181	1.84003	2.02926	1.01177	0.327371	1.66086	2.70297	2.84537	2.76244	1.86202	2.25283	2.94741	3.97566	2.11882	3.57548	2.26504	2.48176
ADCY7	6.9282	11.5368	4.80194	2.1004	0.114707	0.784889	22.1029	5.25542	15.677	0.67755	12.2611	20.6989	1.00072	6.4922	0.661803	8.02138	8.04825
ADCY8	1.14718	1.27739	1.0384	0.983182	0.812702	1.20412	1.93871	1.30199	1.28782	1.21901	1.34108	1.87326	1.09493	0.957731	1.19189	1.21111	1.16472
ADCY9	1.47434	1.50435	1.53101	1.01224	0.695465	1.29229	1.51544	1.83001	1.03205	1.61593	0.705692	1.2546	1.94244	1.8767	1.78958	1.84151	2.32033
ADD1	1.24056	1.66445	1.03558	0.737169	0.615651	1.64718	2.46714	1.0419	1.3012	1.4344	1.35009	2.51729	0.987846	1.0265	0.987345	1.22468	1.25833
ADD3	2.03432	1.13188	1.15649	0.966106	0.992082	1.04181	1.43877	1.4922	0.834987	1.28724	0.743693	1.12681	1.58462	1.17997	0.996342	2.72547	0.956061
ADORA1	0.88265	1.83171	1.33011	0.850341	1.08184	1.06782	2.57698	1.19169	1.35967	1.764	1.3468	2.42259	0.898862	0.942764	0.756813	0.715041	1.12652
ADORA2A	1.72627	1.02677	1.26281	1.69595	0.837974	0.466077	1.06679	1.82232	0.767985	1.65679	0.650302	1.14943	2.32093	2.45168	2.37367	1.00427	1.49013
ADRA1A	2.08637	0.925739	1.10163	0.946742	0.525016	1.52824	0.952621	1.30796	0.708945	2.78036	0.584419	1.02603	1.42467	1.80248	1.40471	1.25356	1.18996
ADRA1B	4.02299	1.37239	4.1972	0.982228	0.900684	1.11709	1.44654	3.47198	0.956736	3.19982	0.666153	1.90795	2.87045	3.18018	3.8796	2.66965	2.07261
ADRA1D	3.71553	0.638619	2.62486	0.827273	0.74739	1.42534	0.66319	2.72463	0.53738	3.43228	0.422598	0.721262	1.48306	1.98655	1.58118	3.23016	1.43217
ADRA2B	0.606124	1.30621	1.037	1.29049	0.928188	0.781322	0.886345	1.12686	0.889262	1.27014	0.746458	1.65939	2.44446	1.03927	1.46185	0.541799	1.39077
ADRA2C	0.669056	1.38835	0.905509	0.787241	1.16802	1.04474	1.10239	0.782897	1.02897	0.983726	0.92565	1.99339	0.819801	0.73039	0.831459	0.754485	1.11779
ADRB1	1.36431	0.923662	0.841752	0.628536	0.878268	1.4932	0.672935	1.18634	0.695154	1.26995	0.537864	1.19739	1.40899	0.966802	1.32135	1.29034	1.14559
ADRB2	1.23583	1.72707	0.978875	0.823995	1.40205	0.773954	0.92558	1.08967	1.01345	1.34811	0.73316	2.62039	1.34514	1.07403	1.11377	1.06118	1.6106
ADRB3	1.39059	0.891682	0.849133	0.60195	0.9407	1.45735	0.849501	1.16664	0.714331	1.06429	0.522234	1.0613	2.003	1.72413	1.86759	1.67625	1.86202
ADRBK1	0.765836	2.1176	0.806948	1.24621	1.20301	0.550785	1.35809	0.759502	2.12806	0.979195	1.74235	3.33207	1.59341	1.13635	1.2755	0.781257	1.76823
ADRBK2	1.81171	1.65401	1.29851	0.658162	0.980209	1.36163	1.23797	1.43401	1.00209	1.65834	0.780391	2.23392	2.28646	2.38087	1.72756	1.52088	1.74711
AGO1	0.554764	3.34815	1.06975	1.72118	1.26436	0.0144595	1.92006	0.712116	2.93802	0.916252	2.39718	5.48724	2.11247	1.20534	1.40945	0.577498	2.44403
AGO2	0.69902	3.28103	1.27225	1.48022	1.08403	0.435752	1.88337	1.0259	2.2109	1.07188	2.15959	5.12166	2.14147	1.29446	1.47942	0.756982	2.36993
AGPAT9	0.911506	2.75064	2.05843	1.51156	0.658476	0.829967	1.26999	0.996465	1.79487	1.12342	1.5547	5.28465	1.76956	0.695323	0.963697	0.857024	2.30483
AHR	2.47662	0.789575	2.89933	0.70965	0.955693	1.33466	1.12261	2.15561	0.437518	2.77001	0.27705	0.25861	0.908879	1.12038	1.02471	2.22911	0.842022
AHRR	1.83015	1.52321	1.36487	0.886626	0.833017	1.28036	1.44275	1.27083	1.64046	1.29919	1.63695	1.44898	0.998658	1.09722	0.992528	1.94902	1.48942
AIFM1	0.900945	0.879713	0.504773	0.722822	0.874223	1.40295	1.03828	0.645677	0.731447	0.640886	0.594617	0.617102	0.95562	0.869	1.04733	1.2244	0.736073
AIP	0.574862	1.01812	0.609859	0.699805	0.71937	1.58083	1.1766	0.477221	1.11937	0.606828	1.20899	1.0466	0.704374	0.739518	0.764321	0.635813	0.934877
AKAP1	0.747375	0.782156	0.764647	0.576204	0.529494	1.8943	0.830454	0.610186	0.867173	3.20591	0.979792	0.915751	0.718515	0.45836	0.780916	0.763542	0.841949
AKAP10	1.12353	1.14099	0.538865	0.865296	0.97375	1.16095	1.32616	0.743982	0.984856	1.07945	0.906013	0.928706	1.2509	1.24639	1.44951	1.00221	1.20431
AKAP11	1.30072	1.31751	0.664961	0.802997	0.878238	1.31876	1.34961	0.824704	1.0955	0.649653	0.549046	0.843048	1.57945	1.517	1.7378	1.88396	1.21
AKAP12	1.11942	1.17155	1.80333	0.748036	0.996899	1.25507	1.28669	1.36249	1.06931	1.18396	1.17142	1.21407	0.421858	0.187609	0.337408	1.30541	0.852284
AKAP13	1.02965	1.87869	1.2327	0.744676	0.845943	1.40938	1.61292	1.43713	1.81185	0.93143	1.4738	2.14924	0.971149	0.682776	0.800813	0.889929	1.58678
AKAP3	0.629645	1.18884	0.732013	0.55946	0.586748	1.85379	1.10609	0.571323	1.12673	0.599618	0.954402	1.33737	0.735397	0.509817	0.823221	0.548212	1.16245
AKAP4	0.973573	1.27617	0.826046	1.02809	0.866297	1.10561	1.45442	1.06964	1.0559	1.27538	0.803423	1.02995	1.14154	0.821232	1.3741	0.896273	0.995484
AKAP5	2.36826	1.41285	1.14248	0.526384	1.07704	1.39658	1.35093	1.08324	1.25211	1.13133	0.976785	1.42887	0.643038	0.69019	0.787892	3.23963	0.908856
AKAP6	1.00241	1.51405	0.895489	0.547614	0.683967	1.76842	1.38943	0.746733	2.29955	0.918798	1.87544	2.46953	0.704207	1.28557	0.693691	1.10703	1.69136
AKAP7	1.934	1.94058	1.93133	0.615038	0.849922	1.53504	1.49416	1.65065	3.02201	2.29947	2.77057	2.5872	0.662771	2.04627	0.843922	1.85396	1.75907
AKAP8	1.6079	1.89699	1.02335	0.642366	0.905793	1.45184	1.59004	1.54454	1.82765	1.14025	0.89745	1.95262	1.39887	1.31143	1.77364	1.2994	1.74887
AKAP9	1.56338	0.877718	1.27558	1.24191	0.715557	1.04253	0.882084	1.35377	0.818601	3.35993	0.499126	0.833707	1.44398	1.21455	2.14587	1.14329	1.02903
AKT1	1.1509	2.20765	1.23809	0.990117	0.661741	1.34814	2.12505	1.18062	2.78126	1.49521	1.65313	2.51887	1.18243	0.816426	1.25773	0.898448	1.64018
AKT1S1	2.09646	1.3586	1.2786	1.00574	0.52955	1.46471	1.4018	1.71225	1.22999	1.75155	0.690925	1.11113	1.71957	1.96425	1.93735	1.93538	1.16678
AKT2	2.26417	1.37111	1.77183	0.794166	0.645892	1.55994	1.52701	1.93154	1.72566	1.8035	0.926326	1.74468	1.64156	1.3542	2.08778	1.8664	1.48067
AKT3	1.63395	1.04325	1.77622	0.883785	0.920464	1.19575	1.12663	1.59291	1.02035	2.09595	0.637451	0.621925	0.904928	0.99595	1.07198	1.73268	0.607331
ALK	0.815198	1.31822	1.06838	0.605774	0.890641	1.50359	1.96989	1.05092	1.73246	0.765667	1.19294	2.29428	1.03011	0.977135	0.900759	0.682203	1.19351
ANAPC1	0.299959	1.44079	0.514577	0.0901885	0.818159	2.09165	2.00879	0.436826	0.88664	0.696334	0.635021	2.26171	0.405503	0.36397	0.50148	0.239196	0.747702
ANAPC10	1.11832	1.24986	1.05905	0.43025	0.54777	2.02198	1.62834	1.07284	1.18411	1.13073	0.536908	2.18592	0.754613	0.650143	0.842047	0.990851	1.26036
ANAPC11	1.03834	0.774138	0.686145	0.846767	0.591397	1.56184	0.878653	0.921971	0.721681	1.14864	0.442277	0.684268	0.786508	0.912951	0.673	1.14823	0.564617
ANAPC13	0.448862	0.586597	0.558625	0.821316	0.746748	1.43194	0.657849	0.650468	0.483033	0.525019	0.247811	0.405515	0.65278	0.679444	0.545241	1.21079	0.329372
ANAPC2	2.95532	2.54758	2.55668	1.31589	0.666093	1.01802	3.74466	2.47999	2.89626	4.47789	1.84416	4.63655	1.90027	2.1439	2.03633	2.80804	3.09945
ANAPC4	4.25621	1.88991	3.06324	1.14398	0.562826	1.29319	2.36928	2.57083	2.32317	5.17138	1.52524	2.8755	1.99158	1.96187	2.8293	3.5862	2.23309
ANAPC5	0.92175	1.2282	0.719921	0.876254	0.812837	1.31091	1.71329	0.766473	1.654	0.780408	1.08839	1.79147	1.20246	1.18265	0.957746	1.41945	1.07639
ANAPC7	0.61372	1.62981	0.649804	0.653646	0.396096	1.95026	2.38406	0.513882	1.34366	0.766444	1.31523	2.59939	0.935454	1.07315	0.912516	0.685616	1.48371
ANGPT1	0.316332	1.48639	0.420612	0.485614	0.624209	1.89018	1.87287	0.364132	1.04148	0.633762	1.0462	1.91531	0.665065	0.801846	0.748345	0.38306	1.09651
ANGPT2	1.80362	1.79498	0.924039	1.06728	0.238267	1.69445	2.38379	1.06135	2.8411	1.36071	1.75127	2.49621	1.97788	2.45124	2.0713	1.35833	2.07623
ANGPT4	1.42804	1.58037	1.13491	0.951397	0.488122	1.56048	2.35495	1.0764	1.71269	1.36934	1.31132	2.09537	1.43268	1.49004	1.59508	1.2046	1.57295
ANGPTL1	0.516889	1.34273	0.850418	0.543446	0.0961491	2.3604	2.62867	0.67504	2.07574	0.826555	1.39061	2.64563	0.638129	1.20812	0.734875	0.590967	1.42194
ANGPTL6	1.17295	1.36638	0.662334	0.904032	0.721637	1.37433	1.89407	0.860175	1.29497	0.811323	0.936166	1.55938	2.29809	1.41793	1.95502	1.4111	1.36655
APAF1	0.826348	2.50109	1.49992	0.745598	0.333168	1.92123	3.62815	1.07985	2.72793	1.18003	2.1441	4.0777	0.555391	1.25747	0.558366	0.752792	1.87243
APC	0.999622	1.90449	1.3672	0.979121	0.583902	1.43698	2.80036	1.20802	2.94677	1.13681	2.13888	2.6493	1.22746	1.5261	1.36399	0.925714	1.53017
APH1A	2.42956	1.29318	1.91284	1.34482	0.647344	1.00784	2.11982	2.40494	1.91778	1.35604	1.21214	2.09461	4.04609	3.03726	4.12877	1.33845	2.16824
APH1B	0.628839	2.12857	0.648256	0.738737	0.870651	1.39061	2.2932	0.450476	1.83096	0.563405	1.57476	2.36764	0.84742	1.27342	0.893939	0.597756	1.20679
AR	2.07864	1.49007	1.33887	0.948913	0.666191	1.3849	1.90697	1.66578	1.48538	1.61958	1.04648	1.64954	2.01472	2.24057	2.0692	1.54105	1.7097
ARAF	2.03243	2.35515	2.55314	0.733427	0.569304	1.69727	4.01207	2.23657	3.33754	1.69919	2.53611	2.99712	0.884579	1.53863	0.189197	2.30259	1.24877
AREG	2.77336	1.91421	2.57939	0.732809	0.834807	1.43238	3.03291	2.3609	0.630859	1.73055	0.765604	2.99477	0.0102136	0.562583	0.011279	2.87707	2.04036
ARF1	2.412	1.44553	2.01213	0.829462	0.66283	1.50771	1.52435	2.52887	1.33239	1.68264	0.960252	1.46686	1.84755	2.62949	1.5957	2.37547	1.93488
ARF6	0.901088	0.693756	1.32275	1.67382	0.659754	0.666429	0.705437	1.09522	0.572996	1.70203	0.417297	0.837213	2.29729	2.91432	1.3961	0.845854	0.593766
ARFGAP1	0.908349	0.490534	0.631262	0.86532	0.841739	1.29294	0.554014	0.846708	0.394681	1.43262	0.272554	0.486552	0.919174	1.08563	0.983716	0.765636	0.886835
ARFGAP3	1.05396	0.449302	1.27189	0.869724	0.881358	1.24892	0.516118	1.14084	0.45215	1.60161	0.417583	0.420361	0.581569	0.883746	0.677942	1.19226	0.716766
ARFIP2	1.26167	1.22208	1.96359	1.62392	0.847765	0.528316	0.96054	1.68807	1.19218	1.30062	0.91378	1.97309	2.23107	1.37172	1.42052	1.05358	1.25622
ARHGDIB	1.98819	0.995575	1.31687	0.716974	1.38906	0.893966	0.913817	1.769	0.641164	2.05186	0.471655	1.22301	2.05814	2.29693	1.98295	1.10848	1.31042
ARHGEF1	1.59842	0.655615	1.40777	0.992465	0.695748	1.31179	0.475078	1.68856	0.548224	3.01249	0.367599	0.983399	1.41334	1.1523	1.53454	1.23888	0.994552
ARHGEF10	0.795445	3.1806	1.00261	1.20882	1.47134	0.319835	0.733778	0.953039	1.01503	1.41388	0.255612	4.66693	2.47988	1.06838	1.82556	0.687793	2.65721
ARHGEF11	1.91502	1.34416	1.70279	1.07848	0.836192	1.08533	0.974439	1.99247	1.1323	2.2501	0.76544	2.17454	2.037	1.47575	2.0149	1.53031	1.64694
ARHGEF12	0.499991	1.80571	0.638284	1.11872	0.969322	0.911953	1.18423	0.433741	1.0872	0.738358	0.842869	2.6241	1.59053	1.25174	1.19407	0.773856	1.46319
ARHGEF15	1.62181	0.891365	1.55031	0.894766	0.650107	1.45513	0.753743	1.43488	0.81487	4.30088	0.618984	1.23087	1.54398	1.47376	1.56429	1.12756	1.10742
ARHGEF16	1.19133	1.1693	1.63462	0.974849	0.863235	1.16192	0.688691	1.23148	1.56754	1.52966	1.58751	1.31331	0.505318	0.178556	0.00912931	0.890961	1.41632
ARHGEF2	0.652758	1.02602	0.941414	0.984055	1.04052	0.975421	1.38375	0.68829	1.06123	0.749471	1.1621	0.777517	0.7876	1.14733	0.726117	0.621402	0.79078
ARHGEF3	0.398331	0.949173	0.444979	0.656108	0.905443	1.43845	1.07554	0.414011	1.03544	0.680863	1.00167	0.855027	0.594731	0.61672	0.527866	0.862018	0.781926
ARHGEF4	0.759359	0.995282	0.872008	0.761493	0.611836	1.62667	0.978839	1.0597	1.12455	1.33723	1.12461	1.12625	0.842122	0.819095	1.18676	0.694061	1.17058
ARHGEF5	0.814384	0.824179	0.88294	0.595883	0.820761	1.58336	1.0006	0.719333	0.840939	0.616758	0.965612	0.827314	1.04879	1.13057	0.828422	0.61022	1.24609
ARHGEF6	0.93714	1.04474	1.0782	0.828121	1.11286	1.05902	1.21994	0.822503	1.00824	2.7617	1.15551	1.24883	0.726185	0.567202	0.653252	0.763072	1.37741
ARHGEF7	0.675715	1.14329	0.46214	0.918346	1.24641	0.835249	1.30972	0.602	0.904259	0.727747	0.810959	0.875664	0.819208	1.07738	0.882039	0.924116	0.909612
ARHGEF9	1.27853	1.25325	1.18377	0.867755	0.885066	1.24718	1.77872	1.3822	1.02856	1.3731	0.795749	0.81492	0.919983	0.858239	0.909982	1.81604	0.885683
ARID1A	1.53729	1.40065	1.04857	0.923799	0.850819	1.22538	1.60297	1.22996	1.0365	1.47698	0.644489	0.813897	1.22944	1.33274	1.33009	1.58047	1.22665
ARNT	1.1048	1.01407	0.836805	1.18713	0.719458	1.09341	1.00297	0.931392	0.919093	1.4698	0.705483	0.879015	1.07077	1.10114	1.33953	0.956519	0.934445
ARNTL	1.23007	1.23413	0.597888	0.889936	0.60976	1.5003	1.05101	0.961863	0.999143	1.75959	0.602908	1.20617	0.822178	0.629612	0.916838	1.03189	1.0054
ARRB1	0.816493	1.58349	0.651566	0.771259	0.748274	1.48047	1.42704	0.552708	2.35488	1.01439	2.14318	1.85434	0.734071	1.12897	0.824254	0.688053	1.29304
ARRB2	1.43589	1.51656	1.65881	1.17668	0.787477	1.03584	1.56684	1.9336	1.98523	1.60844	1.69546	1.55783	0.779089	1.11272	0.77568	1.37978	1.14554
ATF1	0.988192	1.27886	0.910027	0.917802	1.14552	0.936675	1.31002	1.07032	1.43584	0.902616	1.10419	1.38681	1.2258	1.11509	1.59133	0.871866	1.27095
ATF2	0.802955	1.02009	0.416524	1.01414	1.10875	0.877102	1.08718	0.670458	0.758603	0.608645	0.421475	0.700153	1.38424	1.27108	1.32069	0.832367	0.800668
ATF3	1.30203	1.57685	1.94168	0.673092	0.853618	1.47329	1.4324	1.48592	1.89546	1.58228	1.29517	2.22618	0.694414	0.544883	0.735858	1.51662	1.50783
ATF4	2.98151	1.60448	1.96248	0.640953	0.804105	1.55494	1.2796	2.99787	1.67985	2.09553	0.822108	1.967	0.7832	0.623417	1.09482	2.07246	1.54825
ATF5	0.747784	1.2088	0.989227	0.88712	1.17766	0.935222	1.48629	1.31114	1.63433	0.577166	0.826166	1.49825	0.605479	0.574486	0.733233	0.690945	0.990906
ATF6	0.59754	1.36384	0.55461	0.524751	0.783963	1.69129	1.34626	0.542749	1.82398	0.561286	0.83146	1.75301	0.681674	0.573831	0.67484	0.711072	0.83881
ATF7	1.51529	1.43798	1.05941	0.646521	0.941535	1.41194	1.46868	1.48833	1.88229	1.19853	1.19434	1.61125	2.60886	2.3441	4.27153	1.49594	1.67522
ATIC	1.46942	0.91265	1.50998	1.58826	0.536484	0.875255	1.18051	1.38132	0.980617	2.30699	0.488762	1.17489	1.34041	1.1766	1.38659	1.09586	1.12615
ATM	2.52717	1.2968	2.02536	1.04402	0.366643	1.58934	2.01351	2.48275	1.70062	1.56697	0.413943	2.43125	2.03356	1.20915	2.02021	2.49797	2.00688
ATP2C1	2.50286	1.77787	1.87688	1.19075	0.477783	1.33147	2.49372	1.81997	2.58844	1.8814	1.41014	2.83865	2.01066	1.92846	2.43309	1.98262	2.15767
ATR	0.789941	0.811688	0.762686	1.42559	0.640065	0.934347	1.11449	0.943001	1.00065	0.810253	0.545241	1.0908	1.09971	0.780669	1.31694	0.764622	0.90876
ATXN1	0.787037	0.756123	0.422589	1.05451	0.692583	1.25291	0.797725	0.474641	0.633791	0.303848	0.303446	0.633465	1.71648	1.0829	1.57989	1.05736	0.949007
ATXN10	1.43153	0.740495	0.982233	1.2204	0.468395	1.31121	1.07882	1.37989	1.01247	0.904265	0.528799	0.998458	2.40884	1.55578	2.37548	0.924546	1.36555
ATXN2	0.755575	1.70953	0.844354	0.862024	0.559909	1.57807	2.25237	0.70746	2.32276	1.08993	1.54198	2.43567	1.06842	1.49364	1.19714	0.612721	1.76406
ATXN3	5.16878	1.30594	1.88003	0.964052	0.39013	1.64582	1.82728	2.86421	1.59912	3.0121	0.918795	1.69259	2.07337	2.31423	1.93144	2.22991	1.68306
ATXN7	0.686534	1.65404	1.21534	0.741909	0.132417	2.12567	2.89035	0.762551	3.1483	4.91294	2.0204	2.83521	0.401657	1.29503	0.469074	0.539199	1.25814
AURKA	1.75191	1.27539	1.71883	1.25479	0.625847	1.11936	1.93175	1.54918	1.57588	1.02876	0.98196	1.51702	2.52499	2.21044	3.16765	1.12524	1.62183
AXIN1	1.48659	1.31358	0.865526	1.02375	0.720949	1.25531	1.86731	0.922647	1.55166	0.866453	0.926764	1.68118	2.05813	1.77845	2.36093	0.719087	1.53457
AXIN2	0.836131	1.80925	1.00983	0.823712	0.771357	1.40493	2.25204	0.875894	2.12825	0.960711	1.46531	2.13231	0.876622	1.32778	1.00613	0.790234	1.34052
AXL	0.434061	1.5357	0.519249	0.856547	0.871752	1.2717	1.9124	0.386327	1.75401	0.485353	1.43962	1.74982	0.902163	1.23949	0.943513	0.488633	1.17481
BAD	1.74566	1.22005	2.38395	0.950074	1.08932	0.96061	1.2166	1.9258	1.64233	2.50085	1.00547	1.54378	1.34389	1.49942	1.4949	2.1818	1.66728
BAK1	0.438694	1.66578	0.479405	0.746383	1.07685	1.17677	2.18823	0.432998	1.7619	0.504742	1.35779	1.92005	0.791196	1.20161	0.904104	0.417172	0.977453
BAX	2.82722	0.310509	3.1441	0.823768	0.947517	1.22872	0.442329	1.99992	0.267517	2.74635	0.173557	0.286214	0.966905	1.36706	1.08149	2.15326	0.985067
BBC3	2.0458	1.85497	1.71142	1.02913	0.773937	1.19694	1.80707	1.77181	1.40642	1.99707	0.976216	1.93499	1.92426	2.25222	2.87	1.52048	1.96221
BCAP31	0.68947	2.66295	1.13524	0.862658	0.859985	1.27736	2.87861	0.867397	2.16333	1.13425	1.82464	2.7261	0.860801	1.26944	0.7868	0.735072	1.59063
BCAR1	2.72185	1.82391	1.54387	0.90636	1.10363	0.990014	2.15549	2.92615	1.48746	1.3716	0.969723	2.1263	1.54999	2.48896	2.03882	2.02992	1.97069
BCL10	0.598573	1.21108	0.582559	0.74888	1.12353	1.12759	1.22169	0.679093	0.949488	0.651481	0.845123	1.1874	0.708324	1.02335	0.728454	0.69098	0.826787
BCL2	0.729981	0.71788	0.66695	1.20053	0.717572	1.0819	0.740783	0.876941	0.568635	1.26297	0.490445	0.738446	1.57834	1.09904	1.71936	0.65928	0.942369
BCL2L1	0.899556	1.09884	0.853462	0.852292	0.851823	1.29589	0.959268	1.09281	0.823793	0.826933	0.689871	1.21188	0.80581	1.11281	0.868135	0.840775	0.877619
BCL2L11	1.0932	0.537039	1.44211	0.9214	0.916378	1.16222	0.914282	1.19632	0.489754	1.0266	0.323421	0.562984	0.940401	0.829804	0.89556	1.65039	0.919263
BCL9	0.593163	1.29291	0.57144	0.85412	1.14682	0.999061	0.986703	0.483687	1.26043	0.476746	1.11715	1.93859	0.805248	1.07586	0.879538	0.482041	1.09251
BCR	1.07656	1.68192	0.713193	1.00724	1.19676	0.795996	1.4354	0.6501	1.71644	0.701881	1.52151	2.10308	1.00246	1.27545	0.994694	0.895039	1.26019
BDNF	1.59407	1.78414	2.15929	1.25058	1.08687	0.662555	1.21089	2.24593	1.30266	1.12685	1.0062	2.67303	2.18186	1.27682	2.42101	1.28626	1.53615
BHLHE40	0.84235	1.42831	0.954285	1.11882	0.859359	1.02182	1.36285	0.92075	1.60456	1.06505	1.35055	2.65352	1.36969	1.31818	1.19929	0.74049	1.46927
BHLHE41	1.63097	3.31508	1.84745	2.41018	0.567211	0.0226116	1.24115	1.38753	3.60745	2.23353	2.61594	6.92448	2.35791	1.62423	1.53725	1.54174	3.06291
BID	1.89607	1.88788	1.50207	1.17678	0.980085	0.843136	1.30002	1.79947	1.49753	1.78722	1.0946	2.92806	2.08185	1.8506	1.9768	1.45273	2.09954
BIRC2	1.08809	3.83833	2.04692	2.41653	0.562876	0.0205938	2.49482	1.35366	2.71921	2.22612	1.69283	6.91061	2.87463	1.56169	2.23324	0.995192	3.81163
BIRC3	4.19043	1.63991	2.86676	1.37717	0.761815	0.861018	1.01064	2.43954	1.25458	2.69049	0.895499	2.24393	2.95473	3.04456	2.58036	1.91057	2.75617
BMF	0.734445	1.26977	0.903911	0.972342	0.996675	1.03098	1.29707	0.947039	1.29457	0.657886	1.50379	1.01614	0.83052	1.25416	0.738509	0.742264	0.9952
BMP1	1.61392	1.09348	0.869582	0.868877	0.947501	1.18362	1.27334	1.25809	0.790157	1.43984	0.565574	0.619394	1.44876	1.39049	1.53467	1.2498	1.13958
BMP15	0.845437	0.878109	1.17404	0.575722	0.599308	1.82497	0.85244	0.984771	0.962592	0.961563	1.05588	0.833398	0.468716	0.517927	0.468971	1.14758	0.683966
BMP2	0.716736	0.952725	0.753401	0.549444	0.519908	1.93065	0.951684	0.578041	0.999438	0.483749	1.0331	1.03032	0.618842	0.581099	0.546727	0.90684	1.05874
BMP3	1.2552	1.61032	2.23346	0.70057	0.309892	1.98954	1.59981	1.7357	2.16343	1.6034	1.79953	2.37432	1.14632	1.69578	0.610502	1.5523	2.46373
BMP4	2.21739	2.00971	1.89444	1.01314	0.801393	1.18546	1.71746	1.76111	1.96515	2.29028	1.71154	2.03457	1.40373	0.920392	1.11717	2.02684	1.86239
BMP5	1.65178	0.798831	1.15584	1.3123	0.80616	0.881543	0.794281	1.22581	0.814327	2.12659	0.596238	0.744727	1.30575	1.27463	1.44435	1.40453	0.886787
BMP6	1.31631	1.37141	1.76395	0.805977	0.882539	1.31148	1.34792	1.35164	1.37964	1.56099	1.28595	1.52347	0.653298	0.550996	0.599388	1.59527	1.16428
BMP7	1.19962	1.21742	1.24726	0.550448	0.56271	1.88684	0.854878	1.07455	1.13671	1.11422	0.90305	1.38906	0.535206	0.265146	0.358673	1.39969	1.05397
BMP8A	1.5056	1.99937	2.18696	0.891558	1.0192	1.08924	1.70557	1.4847	2.0365	1.576	1.47771	1.58908	1.18759	1.07962	1.31665	2.20757	1.3569
BMP8B	2.84761	0.545068	3.36949	1.00678	1.02321	0.970007	0.654628	2.1854	0.369833	2.08862	0.28222	0.35935	1.1625	1.42289	1.46911	2.56228	1.33286
BMPR1A	0.945769	1.28249	1.09471	0.609033	0.856499	1.53447	0.938098	0.764733	1.97058	0.995994	1.91803	1.82962	0.510953	1.12043	0.531378	0.970634	1.39424
BMPR1B	0.742765	1.67609	0.928789	0.68835	0.903773	1.40788	1.2391	0.900629	2.11069	1.03322	1.99044	1.79041	0.698643	1.05264	0.786898	0.781562	1.19088
BMPR2	1.16198	1.60652	1.41323	0.480669	0.864057	1.65527	1.33949	1.38095	2.0069	1.18368	1.56341	2.15456	0.484069	0.524854	0.627376	1.19809	1.35458
BRAF	0.719287	1.50278	0.966922	0.576085	0.958295	1.46562	1.2345	0.651526	1.61014	0.908376	0.99837	1.99967	0.677637	0.471295	0.666246	0.532541	1.27871
BRCA1	0.512023	0.813069	1.17962	0.204892	2.01943	0.775674	0.669503	0.896919	0.828803	0.645254	0.462087	1.16308	0.276654	0.0900989	0.259006	0.726163	0.702015
BRF1	1.88216	1.5857	1.58948	0.825793	0.639044	1.53516	1.45477	1.35589	1.87015	2.03569	1.15792	1.99814	1.52113	1.17958	1.58262	1.73429	1.76804
BTC	2.17211	1.88149	1.36794	1.014	0.776073	1.20993	1.9295	1.2842	2.20258	1.53015	1.14383	2.39458	1.81718	1.72339	2.08517	1.37198	2.02488
BTK	0.719405	1.86268	0.950201	0.673145	0.889123	1.43773	1.67475	0.757472	1.97234	0.691731	1.0873	2.15215	0.612703	0.491763	0.723319	0.702226	1.13611
BTRC	1.0072	1.82515	1.20466	0.769201	0.823749	1.40705	1.85152	0.801803	2.34708	1.12521	1.57176	2.35554	1.17723	1.23123	1.06617	0.945049	1.34918
CACNA1A	1.36128	0.784071	1.13284	1.13076	0.597657	1.27158	0.945084	1.32126	1.06638	2.39042	0.592744	1.10181	1.03867	0.94367	1.47098	1.02426	0.932624
CACNA1B	0.399348	1.48244	0.806677	0.701006	0.771904	1.52709	1.85194	0.528302	1.96372	0.66713	1.0552	2.49152	0.964255	0.886236	0.905226	0.334638	1.59114
CACNA1C	1.39426	0.782093	0.689455	1.01956	0.567494	1.41295	0.904685	1.10012	0.83213	1.1312	0.468204	0.740774	1.25503	1.25015	1.04185	1.33603	0.791928
CACNA1D	1.0217	1.6919	1.6665	1.07055	0.755093	1.17436	1.89946	1.2423	2.45387	1.07198	1.41068	2.14902	0.861262	0.981546	1.24054	0.818965	1.29369
CACNA1E	0.825595	1.83779	0.890236	0.84872	0.70326	1.44802	2.20265	0.822163	2.1537	1.26309	0.835061	2.30132	1.28124	1.21566	1.44177	0.85849	1.57597
CACNA1F	1.03439	1.68295	1.12026	1.04979	0.485173	1.46504	2.40037	1.33459	2.55921	1.31503	1.30584	2.57038	1.14702	1.25206	1.19442	1.13981	1.71059
CACNA1G	1.034	0.741098	0.724099	1.09839	0.516275	1.38534	0.795191	1.13057	0.662287	1.33894	0.272923	0.604382	1.03435	0.318552	0.991814	1.42726	0.457607
CACNA1H	0.43903	1.52502	0.600892	0.709057	0.458813	1.83213	1.91159	0.496038	1.97984	0.718738	1.11826	1.81205	0.736022	0.988259	0.851115	0.534002	1.12326
CACNA1I	0.95116	0.735039	0.911074	0.890034	0.637321	1.47265	0.702632	1.04102	0.71487	1.31333	0.423775	0.560991	0.557736	0.759483	0.681936	1.60492	0.459532
CACNA1S	2.1085	0.918473	2.07872	0.86874	0.533509	1.59775	1.13951	2.32759	1.11764	1.13481	0.561401	1.02694	1.21015	1.09638	1.09029	3.30068	0.817499
CACNA2D1	0.605711	1.13546	1.00619	0.643748	0.607443	1.74881	1.58796	0.857281	1.72632	0.643639	1.03671	1.57155	0.455008	0.795312	0.547027	0.789898	0.90583
CACNA2D2	0.721819	0.774721	0.598616	0.842643	0.809114	1.34824	0.880108	0.723809	0.615286	0.81547	0.421809	0.588575	1.03573	0.995143	1.01666	0.875409	0.90543
CACNA2D3	0.546956	1.11484	0.653649	0.813582	0.814456	1.37196	1.39379	0.555118	1.40234	0.711225	0.914928	1.28899	0.951263	0.887985	0.931677	0.617869	0.90762
CACNA2D4	1.45798	1.32959	1.9465	0.784117	1.12124	1.09464	1.56092	1.54656	1.52539	2.41585	1.02531	0.989973	1.07399	1.24863	1.14116	1.83446	1.26791
CACNB1	1.35133	1.6331	1.97143	0.966799	1.17638	0.856821	2.01723	1.41077	1.57602	1.81504	1.06006	1.1758	1.41545	1.21742	1.50319	1.83496	1.54028
CACNB2	0.610685	1.353	0.701883	1.06629	0.911071	1.02264	1.60928	0.769821	1.26854	0.560072	0.939288	1.51504	2.42945	1.22197	1.40222	0.546467	1.01371
CACNB3	0.459519	1.41983	0.445039	0.803016	0.948028	1.24896	1.6172	0.446994	1.49177	0.493103	1.05019	1.44679	1.15748	1.31021	1.13168	0.38162	0.98929
CACNG1	0.913127	1.8057	1.96599	1.12282	1.09367	0.783507	2.25932	1.6064	2.41114	1.00017	1.57048	2.39511	1.78883	2.49401	1.82726	1.65633	2.33228
CACNG2	1.0506	1.74347	1.06461	0.785315	1.11285	1.10183	1.93776	0.889469	1.81004	0.899058	1.52082	1.65758	0.921702	1.14741	0.906828	1.45782	1.00178
CACNG3	0.737864	2.26543	0.758502	0.855256	0.943575	1.20117	2.30875	0.551289	1.9767	0.804044	1.41801	2.38482	0.861885	1.27538	0.885191	0.813612	1.31436
CACNG4	0.801632	1.52393	1.21101	1.26487	0.959733	0.775399	1.6393	1.143	1.42179	1.17327	1.21794	1.44242	1.39062	1.28539	2.2077	0.810092	1.4104
CACNG5	1.66263	1.15255	0.859866	0.771823	0.954738	1.27344	1.27671	1.14885	0.884003	1.00183	0.677933	1.02714	1.69399	1.61465	1.662	1.75805	1.32127
CACNG6	1.55302	0.868816	0.964453	0.777539	0.945923	1.27654	1.19318	1.21547	0.88346	0.834334	0.470977	1.00932	1.69895	1.66196	1.65543	1.36048	1.66774
CACNG7	0.7298	1.51631	0.679873	0.761292	1.21234	1.02637	1.20857	0.565145	1.2252	0.638785	1.09666	1.58321	0.668891	0.992939	0.750248	0.70474	0.876446
CACNG8	1.73867	1.16617	2.46005	0.79541	1.05833	1.14626	1.46734	1.78551	1.43111	2.88727	1.29393	1.30825	0.697058	1.05577	0.824616	1.80987	0.872562
CALM1	1.66251	1.71523	2.04298	0.756501	1.20749	1.03601	1.08399	1.33984	1.13088	2.05622	1.19327	1.81029	0.581071	0.864006	0.690336	1.5723	0.872983
CALM2	1.34732	1.39679	1.05228	0.911205	1.04579	1.043	0.896353	1.09048	0.826157	2.53947	0.68876	1.61226	0.910291	0.953325	1.19739	0.87525	1.07376
CALM3	0.848989	0.571086	0.67932	0.978484	0.684135	1.33738	0.542315	0.839168	0.518013	1.355	0.404297	0.73798	1.23389	0.942127	1.28348	0.625283	0.726312
CAMK1	0.868779	2.06942	0.855293	1.1076	1.21585	0.676549	1.4469	0.723923	1.52943	1.18695	1.18461	2.84177	1.04163	1.18732	1.00366	0.800608	1.43958
CAMK1G	0.723111	0.691398	0.580371	0.841793	0.864862	1.29334	0.695641	0.624468	0.547816	0.466244	0.374818	0.713457	1.13586	1.38869	0.856456	0.835738	0.745258
CAMK2A	1.78505	1.93074	1.53331	1.15053	1.23752	0.611949	1.03007	1.9006	1.60414	1.11395	1.37872	2.65255	3.93813	2.69794	3.79833	1.30663	2.19021
CAMK2B	2.0195	1.59569	1.66714	1.11418	0.921211	0.96461	1.28307	1.99558	1.49832	1.72942	1.18808	2.51897	1.93551	1.63077	1.75952	1.8295	1.84446
CAMK2D	1.98488	1.1003	1.11468	0.757567	0.74086	1.50157	0.842433	1.64979	0.929944	1.23859	0.638346	1.40616	1.99453	1.69842	1.95695	1.7876	1.44772
CAMK2G	1.28005	1.35241	1.06242	1.15127	0.765675	1.08306	1.22895	1.50719	1.17713	1.24696	0.943315	2.05325	2.04149	1.91082	1.92134	1.10227	1.7418
CAMK4	0.664909	1.11735	0.865312	0.956666	1.13635	0.906987	1.28369	0.74518	1.27146	1.02986	1.50568	0.921835	0.542453	0.919831	0.523952	0.841245	0.98067
CAMKK1	0.992655	1.14927	1.01368	0.776699	0.999254	1.22405	1.16885	1.00304	1.32799	1.21006	0.991142	1.06862	1.01389	0.975428	1.19333	0.908396	1.20247
CAMKK2	1.67199	1.45379	2.15831	0.717626	1.05102	1.23136	1.56283	1.76825	1.59232	2.13642	0.975625	1.16239	0.855715	1.01133	1.0432	2.06014	1.39255
CAPN1	0.748894	0.679084	1.17094	0.524062	0.876082	1.59986	1.05993	1.02117	0.791484	0.778723	0.641265	0.716084	0.398608	0.443203	0.417401	0.881063	0.600409
CAPN11	0.886972	0.706697	0.73769	0.898488	1.03328	1.06823	0.937547	0.771455	0.604772	0.791879	0.460894	0.477287	0.951745	1.33453	0.817161	0.937567	0.744344
CAPN2	2.38455	1.08538	1.20443	0.870269	0.895733	1.234	1.1051	1.45581	1.10851	2.00336	0.719092	0.947664	1.63358	1.96414	2.02997	1.86269	1.44855
CAPN3	1.14508	0.725069	1.46345	1.55721	0.933963	0.508829	0.90601	1.62294	0.71524	3.18748	0.595944	0.596501	0.766442	0.963454	1.5608	1.28131	0.836565
CAPN5	1.16401	1.63337	0.809634	0.954744	1.0191	1.02616	1.36282	0.826303	1.87117	0.853909	1.65887	1.70226	0.94124	1.07081	0.982092	1.54645	1.46919
CAPN6	0.60888	1.30866	0.675528	0.896604	1.01835	1.08505	1.60918	0.869182	1.51639	0.621853	1.47756	1.50487	0.704603	0.493633	0.539586	0.619323	1.04662
CAPN7	0.634113	1.2567	0.786063	0.874341	1.02041	1.10525	1.24609	0.700988	1.30502	0.695824	1.22692	1.36717	0.911271	0.92393	1.13874	0.509284	1.17228
CAPN9	0.549502	1.19929	0.439858	0.661908	0.906748	1.43134	1.12068	0.357424	1.15849	0.383267	1.05661	1.08452	0.744698	1.00334	0.825995	0.890486	0.847794
CAPNS1	0.791992	0.839525	1.3654	0.585869	0.731924	1.68221	0.70998	1.134	0.833353	1.06425	0.781415	1.11144	0.406395	0.526268	0.447163	1.03075	0.941371
CARD10	1.60261	0.881728	1.54395	1.37416	0.965765	0.660075	0.892942	1.70371	0.712889	1.97452	0.475324	0.797582	1.48411	1.21882	2.26208	1.28206	0.917703
CASP1	0.962827	1.17558	0.751276	0.767006	0.993217	1.23978	1.0805	0.849339	1.32445	1.1138	1.16438	1.26055	0.872492	1.30508	0.876129	0.981183	1.04625
CASP10	0.843948	1.54388	0.986766	0.553591	0.490603	1.95581	0.982106	0.711394	1.79259	1.05126	1.50912	2.20179	0.942139	0.797566	1.0221	0.829775	1.74075
CASP12	1.46477	1.38548	0.920028	0.848687	0.717956	1.43336	1.19652	1.45009	1.41461	1.28445	0.713892	1.94094	1.20755	0.906876	1.46283	1.15138	1.82137
CASP2	3.2509	1.72879	2.86717	0.86385	0.906824	1.22933	1.47532	2.67108	1.5384	1.84516	0.838886	1.99644	2.12516	2.09576	2.48592	2.48439	1.95875
CASP3	2.2284	1.38206	1.68018	0.757529	0.904443	1.33803	1.20949	1.51883	1.20069	1.92148	0.856344	1.31096	1.49775	1.54337	1.81175	2.04533	1.42286
CASP4	1.36051	0.616604	1.08242	1.41546	0.856447	0.72809	0.635576	1.25303	0.571412	2.21253	0.31459	0.684469	1.43578	1.04689	1.95593	1.01091	1.01396
CASP5	1.35128	1.22912	0.807206	0.744056	0.963848	1.2921	1.35808	1.43646	1.20097	1.25721	0.868727	1.27506	1.10506	1.30403	0.970788	1.61782	1.10237
CASP6	1.40601	1.40794	1.35653	0.674453	0.644671	1.68088	1.56135	2.39752	1.9531	1.75946	1.00954	2.21043	1.03181	0.677493	1.01171	1.01776	1.33202
CASP7	1.66036	0.997048	1.35267	1.19261	0.695682	1.11171	1.06161	1.45215	1.17612	2.18431	0.659536	1.23205	1.24088	1.4044	1.54616	1.25958	1.07836
CASP8	1.17548	1.63561	1.5339	1.04586	0.970404	0.983736	1.75136	1.39684	1.23699	1.06554	0.754062	1.04374	1.21155	1.08912	1.13726	1.82796	0.838663
CASP9	2.13812	0.687449	1.13474	1.15557	0.531607	1.31282	0.878659	1.78044	0.982764	3.32338	0.410467	1.15558	1.05647	1.17835	1.5005	1.41585	1.07825
CAV1	1.4319	0.709765	1.20025	1.50678	0.71452	0.778698	1.13682	1.5745	1.29808	1.18482	0.355605	1.29934	1.53468	1.2067	1.66581	1.12106	1.12006
CAV2	2.58184	3.05454	3.71942	0.855133	0.750208	1.39466	3.63506	3.21842	4.18239	2.07834	1.71546	3.44208	0.953335	0.876045	0.405178	3.29589	2.08528
CBL	2.16147	1.15522	2.30925	1.14367	0.607966	1.24836	1.36084	3.6476	1.58482	1.65928	1.02415	1.68555	1.49265	1.41304	1.39327	2.73273	1.57227
CBY1	1.24217	0.687387	0.918066	1.55283	0.655645	0.791523	0.921671	1.10508	0.93205	1.59842	0.455856	0.812096	1.70299	0.917708	1.6822	1.00413	0.90878
CCL1	1.48057	0.851092	0.917041	1.32322	0.519042	1.15774	1.10799	1.12449	1.07856	1.58703	0.57653	1.18194	1.64871	1.4094	1.74669	1.2547	1.2746
CCL11	0.783654	1.37807	0.689487	0.786129	0.61734	1.59653	1.5492	0.532089	1.83656	1.0097	1.17999	1.6843	0.788682	1.02215	0.862287	0.775747	1.15096
CCL13	1.77108	1.1099	0.97373	1.24566	0.61973	1.13461	1.48765	1.13708	1.57806	1.11884	0.757976	1.33499	3.14515	1.27704	2.32867	1.35162	1.34168
CCL14	0.45845	0.789444	0.462434	0.959712	0.887918	1.15237	0.944307	0.483219	0.857271	0.491583	0.551794	0.722997	0.729318	0.778749	0.506574	0.90764	0.572684
CCL15	0.845676	0.816768	0.807673	0.799048	0.918378	1.28257	0.91623	0.836232	0.634818	1.78384	0.420268	0.432701	0.672979	0.69075	0.77288	0.906977	0.604553
CCL16	0.797288	0.535858	0.775417	1.16389	0.623349	1.21276	0.648757	0.819754	0.609966	1.8399	0.35838	0.540823	1.02677	0.754147	1.30282	0.726469	0.646825
CCL17	0.3211	1.30745	0.474297	0.669734	1.08077	1.2495	1.454	0.39698	1.60258	0.435731	1.18597	1.49798	0.511094	0.802779	0.705853	0.316631	0.770745
CCL18	0.850047	1.32539	0.87505	0.826686	0.892611	1.2807	1.37867	1.01367	1.44719	1.57061	0.967752	1.35097	0.95945	0.973277	1.13133	0.726697	0.820742
CCL19	1.11092	1.31206	0.889462	0.848057	0.813262	1.33868	1.47347	1.04252	1.32648	1.65028	0.840436	1.25079	1.33759	1.42326	1.29854	1.22344	1.15386
CCL2	1.40937	0.830058	1.69239	0.907405	0.902184	1.19041	0.994222	1.5365	0.767556	2.16131	0.486084	0.675635	1.01682	1.19445	1.00726	1.65947	1.01941
CCL20	0.957564	1.64504	1.21873	0.628337	0.781771	1.58989	1.72788	1.15533	1.47134	1.04613	0.995242	1.54441	0.63394	0.845016	0.658696	1.02055	0.643456
CCL21	1.47713	0.936094	0.707349	0.696608	0.742442	1.56095	1.059	1.00601	0.854338	0.967738	0.546171	0.915123	1.537	1.88394	1.37129	1.20725	1.18151
CCL22	1.69254	1.03671	1.30103	1.66773	0.646292	0.685981	1.08958	1.3571	0.885824	2.79897	0.701848	1.01881	3.01943	1.93368	1.81302	1.06713	1.39669
CCL23	1.26264	0.614451	0.766257	1.07569	0.758767	1.16554	0.686933	1.16426	0.438313	1.50941	0.313838	0.495394	1.22721	1.2685	1.28794	1.02505	0.818277
CCL24	1.25989	1.86369	1.13384	0.879949	0.928884	1.19117	1.65243	0.950183	1.42485	1.01492	1.14908	1.72975	1.23675	1.3539	1.12599	1.01061	1.23511
CCL25	0.911021	1.07242	0.888268	0.899436	0.809849	1.29072	0.966968	0.901121	0.848656	1.22985	0.698628	0.99863	0.787366	0.855168	0.882974	0.789684	0.667885
CCL27	1.39796	1.80114	1.42691	0.902085	0.977847	1.12007	1.32129	1.24887	1.33042	1.1873	1.16306	1.64415	1.27312	1.47886	1.32363	1.47151	1.1627
CCL28	0.997319	1.10581	0.662084	0.944937	0.9069	1.14816	1.00123	0.794571	0.913962	0.794827	0.823785	1.04648	1.26902	1.23918	1.34295	0.920794	0.727345
CCL3	1.40226	1.7415	1.06451	0.894065	0.943547	1.16239	1.03652	1.10081	0.901454	1.22763	0.750372	1.71682	1.27375	1.45635	1.22869	1.15015	1.15414
CCL3L1	1.40848	0.997251	0.914353	0.786602	0.759284	1.45411	0.789555	1.1914	0.747858	1.38473	0.556551	1.17019	1.5455	1.6752	1.83163	1.03671	1.12331
CCL4	0.524033	1.43005	0.949619	0.98188	1.05857	0.959547	0.401936	0.812447	1.21013	0.963567	1.25051	2.04748	0.326136	0.563217	0.342875	0.295952	0.620826
CCL4L1	0.585152	1.68779	0.916824	1.11726	1.05757	0.825177	0.661122	1.14678	1.52281	1.07087	1.34062	2.35243	0.922938	0.96765	1.16377	0.616213	1.17677
CCL4L2	0.420688	1.72734	0.781252	0.973313	1.09236	0.934327	0.916028	0.538286	1.3618	0.70337	1.23673	2.13417	0.839486	0.988181	0.79873	0.343476	1.02515
CCL5	0.510752	1.39008	0.689493	1.04414	0.92035	1.03551	1.06391	0.652536	1.62898	0.660847	1.38192	2.04044	1.11357	1.3133	0.92344	0.903498	1.13657
CCL7	0.548386	2.31038	0.877428	1.36517	1.13794	0.496888	1.52134	0.569532	1.97189	0.999673	1.58453	3.45248	1.30506	1.19149	1.23653	0.616177	1.76464
CCL8	0.615928	1.96343	1.02419	1.73775	0.487547	0.774698	0.970279	1.04842	2.64933	0.463594	1.95687	3.53495	2.00573	1.83561	2.68848	0.439118	2.07607
CCNA1	1.40672	2.09608	1.42587	1.3652	0.858372	0.776432	1.52704	1.34633	2.3597	1.67487	1.64184	3.30193	1.3881	1.3503	1.4367	1.48777	1.85817
CCNA2	1.1485	0.604834	1.30211	0.698691	0.96417	1.33714	0.976319	1.17946	0.464501	1.29284	0.365722	0.540425	1.14463	0.950135	1.14596	1.52896	1.11189
CCNB1	1.17185	0.754851	1.42754	0.959274	0.923283	1.11744	1.14377	1.17768	0.953678	1.57698	0.801774	0.692258	0.54255	0.379119	0.469709	1.47861	0.844627
CCNB2	0.542921	0.99827	0.584023	0.836963	1.02861	1.13443	1.17151	0.497487	1.12358	0.669275	0.919158	0.833049	0.670937	0.760308	0.654376	0.63773	0.868628
CCNC	1.14829	0.796523	0.832783	0.829886	0.99051	1.1796	0.808204	1.06161	0.973759	0.856917	0.607106	0.712662	0.887912	1.21297	1.22502	0.949947	0.899699
CCND1	1.24077	1.57292	1.58684	0.80396	1.22585	0.970195	1.36444	1.41028	1.71015	1.14742	0.814177	1.50329	1.14722	0.964551	1.15446	1.75429	1.59074
CCND2	0.97423	0.753933	0.663108	0.657971	1.16148	1.18055	0.87907	0.928851	0.687017	0.873273	0.454602	0.552221	0.480493	0.733474	0.61833	1.97173	0.507124
CCND3	0.544167	0.830316	1.01857	0.963359	1.04549	0.991149	1.37616	0.697489	1.03212	0.71515	1.06777	0.932025	0.559139	0.584899	0.494153	0.613296	1.11457
CCNE1	1.38273	0.809041	0.791474	1.36625	0.794968	0.838784	0.922119	0.886783	0.973213	1.79655	0.617518	0.753155	1.09734	1.23673	1.57585	0.997833	1.04602
CCNF	1.64154	1.33989	2.42345	1.00128	1.03666	0.962056	1.27468	1.66893	1.58498	2.68164	1.479	1.43776	0.82373	0.950839	0.807304	1.66761	1.21713
CCNG1	1.76384	2.21745	1.17166	0.996541	1.13829	0.865165	2.03943	1.7248	1.71016	1.71703	0.8632	1.72028	1.40916	1.0828	1.68462	3.49064	1.17288
CCNT1	1.02514	1.2347	0.96471	0.877583	0.996038	1.12638	1.07612	0.89473	1.41771	1.00041	1.26397	1.39019	0.744398	0.929888	0.840657	0.961094	1.17876
CCNT2	0.483851	1.06661	0.679111	0.68324	0.92121	1.39555	1.00839	0.536492	1.20127	0.649192	1.15689	1.19778	0.601409	0.75235	0.691807	0.515156	1.00643
CCR1	0.458458	0.946126	0.742183	0.557057	0.751742	1.6912	0.971821	0.609379	0.957912	0.604308	0.981962	1.13054	0.531124	0.438729	0.613021	0.484244	0.801872
CCR10	1.33821	0.976943	0.953579	0.82474	1.00008	1.17518	1.00919	1.27169	0.780278	1.68002	0.671448	0.812491	1.31751	1.57527	1.25566	1.09699	1.0176
CCR3	2.27387	1.84026	3.10036	0.813214	1.13445	1.05234	1.75098	2.45361	1.14589	2.07343	0.592362	1.56803	1.31855	0.834203	1.34835	3.25937	1.45869
CCR4	1.00288	1.19121	1.3024	0.674421	0.933292	1.39229	0.985352	0.974702	1.81592	0.990787	1.89566	1.54637	0.55276	1.16604	0.736347	1.21399	1.22397
CCR5	0.513038	0.84492	0.515015	0.616276	0.884967	1.49876	0.548613	0.376877	0.772184	0.383435	0.952906	1.12052	0.288582	0.62507	0.336688	0.50401	0.694101
CCR6	2.12932	0.281726	2.57277	1.00329	0.990374	1.00633	0.31447	1.45033	0.233122	3.27207	0.158977	0.230398	0.818578	0.931707	0.972252	1.44746	0.884139
CCR7	0.961187	1.41917	1.08214	0.651801	0.781883	1.56632	1.05644	0.831643	1.34126	1.42284	0.95741	1.62629	0.738979	0.767144	0.673244	0.905914	1.2087
CCR8	1.49826	0.948287	1.68921	0.874123	0.779922	1.34596	0.780083	1.83104	0.984585	1.56977	0.536878	1.56518	1.10717	1.09664	1.34452	1.07149	1.70373
CCR9	1.41912	1.04295	1.07844	1.22514	0.749646	1.02522	1.0173	1.42881	1.07068	1.60971	0.898687	1.15984	1.71279	1.44704	1.91516	0.975267	1.24499
CCRL2	0.162473	1.04918	0.741872	0.496073	0.824951	1.67898	0.915028	0.373922	1.3467	0.334716	0.910407	1.77902	0.427081	0.274469	0.400406	0.150177	0.938198
CD14	0.647979	1.30127	0.707838	0.77238	0.856724	1.3709	1.33188	0.607442	1.66193	0.661491	1.19667	1.93012	0.992434	1.11645	1.11509	0.535418	1.29915
CD2	1.84835	1.06984	1.09739	0.990752	0.970777	1.03847	1.24194	1.41316	1.04386	1.38487	0.689977	1.26005	1.97175	1.69578	1.72733	1.75532	1.46655
CD247	0.961176	1.33516	1.01377	0.99684	0.705681	1.29748	1.57998	0.88213	1.97505	1.31813	1.46066	2.31568	0.994757	1.04417	0.928273	0.859718	1.55633
CD27	0.652161	1.55079	0.954258	0.99374	0.787193	1.21907	1.72352	0.857504	2.05933	1.15126	1.29469	2.33817	0.923226	0.923298	0.915349	0.610511	1.51263
CD3D	1.18591	0.780217	1.00101	1.23391	0.505071	1.26102	0.921162	1.24488	0.999257	1.74473	0.660572	1.03574	1.29279	0.903115	1.3662	0.951074	0.903058
CD3E	0.834549	1.43313	1.11293	0.774654	0.59485	1.6305	1.57088	0.994061	2.02101	0.743781	1.23548	2.02866	0.766527	0.899396	0.778056	1.00414	1.18774
CD3G	0.807185	1.19351	1.08209	0.778728	0.759087	1.46218	1.3003	0.862364	1.48491	0.733186	1.01483	1.49163	0.826705	0.927824	0.759411	1.13405	0.924487
CD4	3.95226	0.739272	6.05824	0.871169	0.84592	1.28291	0.959962	4.7321	0.812803	2.34484	0.429862	0.766679	1.73144	1.82983	1.36679	5.25308	1.17901
CD40	0.720213	1.07546	0.538	0.744632	0.7571	1.49827	1.12706	0.510427	1.04331	0.740665	0.652831	1.06152	0.756819	0.80215	0.816544	0.993009	0.635349
CD40LG	0.407255	1.07511	0.559403	1.02829	0.844953	1.12676	1.16905	0.733635	1.1592	0.7762	0.833406	1.17428	0.720442	0.730451	0.801193	0.45758	0.780407
CD70	1.65865	1.11249	2.29536	0.72205	1.04717	1.23078	1.36549	1.74539	1.35305	2.32534	0.939823	1.23384	0.828199	1.05251	0.967721	2.00687	1.05081
CD79A	1.42093	1.58142	1.36509	0.811923	0.70858	1.4795	1.51647	1.13626	1.45148	1.47284	1.0368	1.52546	1.21903	1.3977	1.31871	1.39618	1.1796
CD79B	1.03793	0.718257	0.622704	0.810147	0.744752	1.4451	0.960436	0.946588	0.627148	0.958911	0.369913	0.644918	1.19725	1.16575	1.16046	1.46008	1.14696
CD80	0.44109	1.41047	0.579586	0.730778	0.854292	1.41493	1.41466	0.474139	0.985207	0.421249	0.918094	1.36532	0.658911	0.790348	0.701079	0.436934	0.749367
CD86	0.957305	0.667235	1.15851	0.801082	0.81655	1.38237	0.872605	1.32658	0.52307	0.885544	0.292199	0.532823	0.889767	0.96296	0.903368	1.41707	0.80836
CDC16	1.75198	1.80498	1.25673	0.907883	1.05268	1.03943	1.55704	1.34049	1.37923	1.48994	1.18299	1.62638	1.30398	1.51236	1.28873	1.47691	1.21021
CDC23	1.38639	2.12026	1.6376	0.976874	0.876101	1.14703	1.33526	1.08645	1.16823	1.57744	1.01414	1.78097	0.66946	0.883952	0.702766	1.49599	1.03387
CDC25A	1.19417	1.91118	0.822201	0.902471	0.931821	1.16571	1.27801	0.711856	1.11175	0.830845	0.970223	1.6066	1.03118	1.12538	1.07816	1.40873	1.01781
CDC27	0.729929	1.63469	0.852702	0.954357	1.01217	1.03347	1.18958	0.529215	1.07621	0.283532	1.21379	1.76459	0.377567	0.596387	0.472477	0.591123	0.561102
CDC37	1.80067	1.27546	1.52191	1.23935	0.877331	0.88332	0.672475	1.98916	0.472264	1.52234	0.211517	1.16211	2.76025	2.23819	2.75207	1.34624	1.30107
CDC42	1.90349	1.52417	1.21475	0.872119	0.84357	1.28431	1.15698	1.53583	1.22957	1.58279	1.0269	1.45429	1.23512	1.84048	1.37855	1.33564	1.35755
CDH1	0.647189	1.04191	0.509134	0.874468	1.01531	1.11022	0.965958	0.616442	0.744584	0.597228	0.565289	1.12799	1.01601	1.30994	0.834154	0.767097	0.684637
CDH10	0.790947	1.17073	0.482893	0.604912	0.975767	1.41932	0.914831	0.554623	0.832393	0.845988	0.547447	1.27798	1.01729	1.04012	0.755674	1.57127	0.709134
CDH11	0.502433	1.64276	1.04197	1.08294	0.923315	0.993741	1.08029	0.649049	1.30422	0.851521	1.1963	2.95825	0.812525	0.725916	0.633514	0.516354	1.10769
CDH12	0.343217	2.24374	0.58901	1.01184	1.29103	0.697138	1.03763	0.461624	1.45364	0.52606	1.27884	3.06702	0.773536	0.81078	0.842128	0.548528	1.35857
CDH13	0.534389	1.95402	0.824825	1.29681	0.857155	0.846039	0.923037	0.553758	2.11089	0.726846	1.60292	2.98134	0.74171	0.801605	0.796708	0.589489	1.22295
CDH15	1.18974	1.36891	0.827557	0.949646	0.842995	1.20736	1.07198	1.05389	1.21165	0.691575	0.981608	1.87823	1.88607	1.82336	1.61449	1.46407	1.42464
CDH16	0.915294	2.66946	1.04555	1.20058	1.26083	0.53859	1.43704	0.819211	1.95465	1.00039	1.28754	3.23286	1.25484	1.16289	1.38334	0.78305	1.77389
CDH17	0.446451	2.02487	0.631204	1.20284	0.830178	0.96698	1.50881	0.476082	2.00198	0.685734	1.32192	3.02309	1.03217	0.886226	1.09992	0.53104	1.61094
CDH18	1.49794	0.670384	1.42183	0.885994	0.838521	1.27548	0.936197	1.83847	0.822422	1.7831	0.402384	0.470639	0.915181	0.629799	1.08251	1.22713	0.840464
CDH19	0.531966	0.605866	0.890572	0.577261	0.709175	1.71356	0.787649	0.613655	0.964101	0.966295	0.65436	0.573645	0.487475	0.236103	0.270395	0.551438	1.00015
CDH2	0.632189	0.5969	0.723709	0.829732	0.746357	1.42391	0.773597	0.584181	0.897061	0.398187	0.830269	0.510692	0.350136	0.551638	0.345414	0.325842	0.651146
CDH20	0.614605	1.22348	0.806486	0.475433	1.03598	1.48858	1.14451	0.878194	1.08902	0.588699	0.781353	0.832598	0.882012	0.619717	0.993005	0.548892	0.934044
CDH22	0.364346	0.999834	0.727213	0.942347	0.944872	1.11278	1.18091	0.625758	1.28122	0.774311	1.10061	0.988126	0.865264	0.800348	0.74541	0.415521	0.920708
CDH23	0.6731	0.920581	0.671254	0.690943	1.11513	1.19393	1.20435	0.601497	0.919904	0.486158	0.732352	0.755801	0.661113	0.694037	0.592939	1.48082	0.72785
CDH24	1.45901	1.14304	0.905571	0.99911	1.03396	0.966927	1.30299	0.777729	1.38094	0.873397	1.01063	1.17132	1.4932	1.46384	1.59336	0.905685	1.57698
CDH26	1.82388	1.12409	1.88855	0.912374	1.10284	0.984783	1.14586	1.25043	1.25853	2.41842	1.07608	1.10318	0.802614	0.903546	0.83103	2.19246	1.1258
CDH3	3.24135	0.932925	2.33622	1.12998	0.788348	1.08167	0.966259	2.16184	0.961409	3.34297	0.411485	0.954007	1.58792	1.782	2.18573	2.50905	1.44731
CDH4	2.14522	1.07249	1.94264	1.08899	0.893924	1.01708	1.28303	2.23376	1.22683	2.81392	0.906473	1.1579	0.852201	0.628461	0.84822	1.95924	1.03582
CDH6	1.70834	1.18063	0.779386	1.06557	0.952765	0.981669	1.15744	1.33749	0.792721	1.21044	0.447494	0.614656	1.6177	1.45483	1.67031	1.55161	1.4381
CDH7	0.418636	1.12236	0.58977	0.656056	0.856134	1.48781	1.09714	0.535507	1.28441	0.49382	1.09165	1.26753	0.521311	0.599427	0.583045	0.445035	0.885078
CDH8	1.50309	0.789064	0.571679	0.702449	1.03161	1.26594	0.871286	0.810608	0.733184	0.663314	0.610014	0.843669	0.743015	0.908431	0.780732	2.27565	0.742974
CDH9	0.555926	0.793232	0.73239	0.518978	0.66695	1.81407	0.612886	0.665124	1.01806	0.745806	0.986931	0.977885	0.159081	0.330657	0.24903	0.681932	0.770361
CDK10	1.03207	1.04167	1.1148	1.05207	0.906101	1.04183	1.00745	1.45467	1.06993	1.37843	0.90754	1.15395	0.929621	0.765503	0.947372	1.01011	0.948727
CDK16	1.57776	1.32651	1.85391	0.77564	0.966286	1.25807	1.12675	1.30362	1.43543	1.76986	1.31458	1.72047	0.968151	1.20844	1.12543	1.48995	1.48636
CDK19	0.738581	1.09448	0.900007	0.444078	0.828616	1.72731	0.721051	0.605133	1.09848	0.910324	1.12599	1.87933	0.408107	0.157029	0.504565	0.895945	1.49496
CDK2	1.21214	1.23591	0.872442	0.803065	0.854765	1.34217	0.94276	0.800686	1.17594	0.918639	1.16355	1.54816	0.793574	0.959037	0.792944	1.14059	1.17416
CDK3	1.42524	0.889601	1.02688	0.920229	0.837155	1.24262	0.893296	1.17421	0.606816	1.4473	0.472014	0.599018	0.869966	0.933447	0.931856	1.25927	0.730474
CDK4	0.750519	0.906625	0.82029	0.611012	0.851849	1.53714	0.751036	0.672941	1.05508	0.781354	0.939476	1.59509	0.341426	0.327783	0.385153	0.877884	1.12385
CDK5	1.06337	0.77863	1.11824	0.9679	0.940244	1.09186	0.922803	1.11364	0.711181	1.02067	0.441381	0.686034	1.13663	1.08244	1.13782	1.6724	0.952845
CDK6	0.832318	1.14643	0.89324	0.759848	0.837725	1.40243	0.838312	0.75268	1.264	0.885895	0.960724	1.80316	0.597094	0.669723	0.876313	0.97849	1.21128
CDK7	2.27783	1.20042	1.34802	0.793334	0.848318	1.35835	1.16796	1.65825	1.12255	1.66295	0.946974	1.38665	0.952193	0.982561	0.880372	2.25904	1.04825
CDK8	0.758	1.24916	0.96671	0.825447	0.866444	1.30811	1.20178	0.653149	1.64073	0.842649	1.29062	2.25812	0.670906	0.606405	0.606577	0.847036	1.33647
CDK9	0.819677	1.46759	1.16785	0.850418	0.612422	1.53716	1.55017	0.729593	2.16728	0.95659	1.47738	2.51257	0.863929	0.882207	0.808404	0.808291	1.54267
CDKN1A	3.21241	1.08872	2.26933	1.06822	0.332046	1.59973	1.33222	2.52695	1.53039	2.86792	0.573136	1.95123	1.85122	1.67551	2.41331	2.01527	1.8083
CDKN1B	1.36958	0.816968	0.799736	1.1243	0.899336	0.976369	0.91303	1.0714	0.925986	0.807663	0.813317	1.08439	1.76756	1.25822	1.61688	1.19194	1.20764
CDKN2A	1.94313	0.887673	2.28587	0.79719	1.11591	1.0869	1.23167	1.95593	1.39387	3.36342	0.794503	0.828076	0.705661	1.03259	0.773891	1.9188	0.910293
CEBPA	0.678843	1.39286	1.22304	0.69343	0.2461	2.06047	1.39974	0.841039	1.74799	1.17521	1.33366	2.02535	0.584771	0.645559	0.60156	0.838991	1.04212
CEBPB	1.73274	1.29104	1.39575	0.820076	0.662307	1.51762	1.31459	1.05742	1.59233	1.01954	1.06884	1.57515	0.747473	0.941917	0.769017	3.53992	0.990325
CEBPD	0.614459	1.35653	0.680783	0.797372	0.534994	1.66763	1.3379	0.529832	1.50751	0.666379	1.03664	1.77883	0.798672	0.846845	0.897197	0.551931	0.970125
CER1	0.970476	0.650309	0.678759	1.08261	0.882475	1.03491	0.647882	0.853311	0.551873	0.596869	0.325185	0.663784	1.73271	1.60037	1.68139	0.734855	0.995274
CES1	0.426317	1.54275	1.08481	0.789164	0.983529	1.22731	1.371	0.707778	1.5519	0.578778	1.17118	1.62497	0.70988	0.912999	0.787157	0.491847	1.00234
CFL1	2.04642	1.16967	1.37341	1.02664	0.532008	1.44136	1.07614	2.00006	1.01817	1.8409	0.753461	1.19568	1.91968	1.99652	1.67111	1.41832	1.31333
CFL2	1.70716	1.00058	1.099	0.912232	0.760126	1.32764	0.953143	1.53262	0.938692	1.46574	0.63307	0.966263	1.67856	2.06164	1.56054	1.20016	1.32368
CFLAR	0.94968	0.899221	0.964945	0.740422	0.999366	1.26021	1.04075	1.67026	0.597901	0.695918	0.501519	0.783924	1.66249	1.0938	1.09974	1.53358	1.05214
CHEK1	0.702092	2.11018	1.35256	0.812907	0.487033	1.70006	1.63783	1.05524	1.24103	1.01679	1.0312	1.96567	1.03064	0.970205	0.958769	0.782989	1.07651
CHEK2	1.10645	0.769187	0.852884	1.04754	0.943613	1.00885	0.698967	0.999789	0.535303	1.44926	0.41286	0.668909	1.18908	0.992048	1.37609	0.87535	0.828848
CHRNA1	1.01028	1.74352	1.01346	0.905018	0.894371	1.20061	1.30123	0.766144	1.07277	1.0519	1.07964	1.50057	0.698033	0.875972	0.807456	0.830806	0.764377
CHRNA10	0.900352	1.92611	1.18464	0.921582	0.994042	1.08438	1.36578	0.841769	1.13743	0.777044	1.18086	1.6707	1.39395	1.11546	1.59542	0.700732	1.25365
CHRNA2	0.835056	1.65608	1.01337	1.11023	0.970107	0.919664	1.18207	0.885884	1.17649	0.812148	1.14711	1.49819	1.69744	2.0751	1.44283	0.665252	1.26125
CHRNA3	1.83802	3.31099	1.56262	0.916591	0.0493552	2.03405	1.01284	1.73971	0.734232	1.36687	0.759802	2.35602	0.394621	0.710226	0.493592	1.30654	0.918276
CHRNA4	1.75648	0.964417	1.51994	1.04575	1.11525	0.839	1.21159	1.54835	0.933595	1.90949	0.528437	0.984996	1.38206	1.55207	1.32943	1.74209	1.36699
CHRNA5	0.863409	1.77879	1.05195	1.14164	1.04505	0.813306	0.929747	0.736346	1.15733	0.692129	1.26687	1.52956	0.652263	0.902314	0.664946	0.734338	0.711419
CHRNA6	0.503703	1.83488	0.682176	1.11963	0.990873	0.8895	1.16924	0.500795	1.4761	0.731601	1.31691	1.98965	0.882672	0.992078	0.906964	0.520468	1.02242
CHRNA7	1.05409	1.80187	1.40422	1.03836	0.693666	1.26797	1.0947	1.29015	1.30523	1.27471	1.05109	2.13832	0.646784	0.81773	0.779859	0.986072	0.881076
CHRNA9	0.771515	0.35419	0.542553	1.42786	0.601485	0.970653	0.301765	0.572533	0.292251	1.30167	0.208556	0.371748	1.8818	1.47599	1.28606	0.414186	0.784676
CHRNB1	0.698824	1.58153	0.562994	0.892848	0.731639	1.37551	1.07489	0.534054	1.36625	0.833358	0.929947	2.08724	0.941637	1.11973	0.909384	0.613145	1.16601
CHRNB2	1.22717	2.07198	0.924575	0.988189	0.879934	1.13188	1.25704	0.73525	1.77076	1.01279	1.27815	2.74203	1.12712	1.20987	1.10286	0.778324	1.47505
CHRNB3	0.710896	1.52808	0.767847	0.691673	0.946143	1.36218	1.07002	0.752777	1.29575	0.81627	1.05198	1.94862	0.971687	1.1034	0.910087	0.872626	1.08959
CHRNB4	0.534057	0.735561	0.711961	0.751932	0.774129	1.47394	0.939824	0.853918	0.614076	0.556334	0.398471	0.684551	0.914041	0.840255	0.902201	0.969884	0.870566
CHRNE	1.18093	0.552437	0.852031	0.79123	0.688424	1.52035	0.668077	1.14027	0.436504	1.48218	0.272366	0.566263	1.39862	1.20224	1.33854	0.864527	1.39638
CHRNG	4.0988	5.98933	6.50551	0.540516	0.559211	1.90027	3.71364	5.07216	5.17998	3.72395	2.5006	10.7051	2.70294	1.2249	3.06417	2.83713	5.03793
CHUK	0.829922	0.539843	0.864606	1.16587	0.848115	0.986017	0.839325	0.674651	0.76752	0.942776	0.948517	0.14638	0.350511	0.281678	0.362807	0.771059	0.731579
CISH	0.938945	0.821126	0.818807	0.749299	0.76726	1.48344	0.937273	0.664832	0.841236	1.21134	0.788008	0.599549	0.75276	0.798203	0.677795	0.961015	0.906798
CLCA1	4.16326	0.476333	2.52024	1.32423	0.633119	1.04265	0.525695	2.62423	0.508412	7.28675	0.387822	0.322459	1.78609	1.35135	1.45732	2.42433	1.07883
CLCA2	2.33048	0.611508	1.54914	0.962278	0.657664	1.38006	0.710984	2.08312	0.722622	2.62817	0.32182	0.464348	1.37423	1.13053	1.62714	1.85337	1.04103
CLCA3P	0.752405	0.87623	0.584121	0.719885	0.991331	1.28878	1.06225	0.673067	0.992239	0.630753	0.665896	0.678993	0.505389	0.729157	0.469264	1.08928	0.627295
CLCA4	0.578769	0.79055	0.660218	0.83242	1.07764	1.08994	0.893746	0.581916	1.00106	0.522755	1.08683	0.732195	0.543282	0.652634	0.593453	0.598538	0.845187
CLCN1	1.26234	1.08039	0.76585	1.05392	1.08581	0.860272	1.16335	1.0971	1.0151	0.797161	0.683798	0.754144	1.75639	1.61654	1.90315	0.888378	1.49891
CLCN2	0.821613	1.29473	1.04061	0.941906	1.22491	0.833184	1.83982	1.18184	1.49879	0.82082	1.19856	1.20627	1.52011	1.00149	1.68346	0.825527	1.32994
CLCN3	0.585986	0.980882	0.879649	0.975772	1.00487	1.01935	1.02191	0.721819	1.23117	1.00205	0.952753	1.11108	1.06708	1.0696	1.34001	0.691376	1.32371
CLCN4	0.465343	0.898045	0.65241	0.770154	1.08087	1.14898	0.866283	0.463667	1.05346	0.644666	0.833326	1.00359	0.524121	0.590163	0.560147	0.499588	1.01278
CLCN5	0.436422	1.0499	0.498174	0.838505	1.13469	1.02681	1.02354	0.389576	1.23126	0.531103	1.1842	1.10092	0.533854	0.889991	0.621248	0.682576	0.75457
CLCN6	1.65961	1.97136	2.40753	0.775526	1.34114	0.883337	1.99994	1.77853	2.07852	2.44836	1.69582	1.70034	0.954702	0.864807	1.1293	1.95226	1.21554
CLCN7	0.91119	0.967596	1.19452	0.578592	1.03841	1.383	1.06453	0.801086	1.07635	1.08805	1.09898	1.18386	0.516326	0.732067	0.642951	0.975699	0.815635
CLCNKA	0.601656	1.03172	0.804594	0.606651	0.942127	1.45122	1.0983	0.538407	0.984581	0.573726	1.13396	1.13709	0.746801	0.503951	0.918041	0.55317	0.946448
CLCNKB	1.20996	1.13873	0.797656	0.738729	0.86148	1.39979	1.08122	0.869442	1.05454	0.837311	1.07399	1.14199	1.32666	1.37256	1.0551	1.1041	1.10793
CLEC11A	0.782858	1.0429	0.950558	0.611142	0.827017	1.56184	0.829263	0.615622	1.08916	1.00567	1.06447	1.53778	0.545275	0.561682	0.566076	0.891816	1.10546
CLEC14A	1.89898	1.10164	2.84908	0.744186	0.938097	1.31772	0.956607	1.96286	1.23944	1.89421	1.36685	1.64018	0.452387	0.463838	0.484534	2.16717	1.09223
CLIC1	0.920547	0.966249	0.877479	0.98121	0.809263	1.20953	0.870577	0.786158	1.02023	1.12664	0.999033	1.2033	0.769675	1.01334	0.828068	0.861022	1.05858
CLIC2	0.945775	0.544981	0.90038	1.38469	0.760474	0.854841	0.568485	1.08052	0.564904	2.4586	0.413314	0.596981	1.06361	0.987195	1.66633	0.859282	0.748827
CLIC5	0.38874	0.841456	0.503365	0.579603	0.902666	1.51773	0.732069	0.383446	0.940602	0.543905	0.902911	1.54205	0.539345	0.483918	0.584822	0.32721	1.1486
CLIC6	1.29461	0.742007	0.823032	0.754864	0.966736	1.2784	0.713833	0.817737	0.723224	1.03524	0.569838	1.31685	0.836156	0.627773	0.879121	1.28743	1.08625
CLNS1A	2.29748	1.54403	2.73569	0.783571	0.589708	1.62672	1.18379	1.98422	1.84838	3.34749	1.59012	2.91952	0.594388	0.57113	0.578859	2.04465	1.66583
CLOCK	2.26745	0.641789	1.12174	1.24645	0.567137	1.18641	0.679134	1.67761	0.698031	1.89819	0.467257	0.734726	1.29317	1.85447	1.16501	1.29306	0.959953
CNGA1	0.91621	0.840064	0.874206	1.41081	0.763535	0.825658	0.955019	1.02722	1.00075	0.895633	0.727627	1.09746	1.68523	1.26693	1.63378	0.751888	1.01492
CNGA2	0.659568	0.900731	0.96771	0.664739	1.064	1.27126	0.87576	0.678779	1.08609	0.842354	1.06069	1.37022	0.592484	0.6396	0.568684	0.655534	0.732561
CNGA3	1.53311	1.15858	1.99614	0.722461	1.15685	1.12069	1.21868	1.54922	1.21077	2.32675	0.942912	1.04244	0.807762	0.956679	0.95842	1.73634	0.955779
CNGA4	0.427171	1.37806	0.583404	0.830363	0.868831	1.30081	1.35538	0.429125	1.66478	0.610858	1.26786	1.67905	0.853833	1.0619	0.844998	0.540859	0.930049
CNGB1	2.69645	0.738263	2.74815	1.09338	1.12626	0.780359	1.16863	1.98284	0.305023	2.39339	0.254031	0.325528	1.20536	1.43948	1.27602	1.96542	1.41153
CNGB3	0.429899	1.04383	0.704423	0.751588	0.777356	1.47106	0.963295	0.498128	1.11929	0.666358	0.802475	1.39751	0.525628	0.726478	0.515337	0.493091	0.728734
CNKSR1	0.824067	0.758424	0.626995	0.975641	1.11903	0.905326	1.1041	0.79822	0.51348	0.940986	0.368249	0.599396	1.14256	0.918733	0.82919	1.05725	0.730454
COL10A1	0.476867	1.04492	0.744279	0.712004	0.840685	1.44731	0.786346	0.593313	0.93537	0.602528	0.718568	1.1408	0.386686	0.527721	0.415299	0.522596	0.509047
COL11A1	0.670367	0.822093	0.457135	1.03872	1.03348	0.927799	0.802139	0.546707	0.607717	0.549557	0.494393	0.793671	1.47501	1.15069	1.19595	1.09902	0.734438
COL11A2	0.873059	1.05643	0.727165	1.15217	0.802057	1.04577	1.01335	0.787471	0.835296	0.63261	0.8159	1.01176	1.80579	1.64397	1.37257	0.686174	1.18558
COL12A1	0.327171	1.67705	0.516947	0.848012	0.939599	1.21239	1.28509	0.301721	1.3971	0.591486	1.12508	1.68714	0.781846	1.04986	0.79848	0.385911	0.898048
COL13A1	0.747406	1.97982	0.6628	0.826442	0.91367	1.25989	1.49636	0.4962	1.42682	0.673002	1.493	1.86228	1.20221	1.13803	1.16351	0.702405	1.06574
COL14A1	0.815481	1.4418	1.10019	0.526772	0.961799	1.51143	0.970401	0.892555	0.735986	0.69473	0.795777	1.29548	0.448018	0.577873	0.423885	0.873838	0.555882
COL15A1	1.0247	1.07681	0.987828	0.819491	0.934087	1.24642	1.30994	0.998188	0.872471	0.949227	0.516553	1.10624	1.07643	1.0979	1.0233	1.20304	1.05249
COL16A1	1.45171	0.617025	0.851897	0.840841	0.691365	1.46779	0.653418	1.26448	0.427999	1.48621	0.328286	0.469613	1.2326	1.15897	1.28161	1.15457	1.08819
COL17A1	1.71812	1.52717	1.78497	0.790251	0.839945	1.3698	1.81737	1.59012	1.32673	1.82431	0.799951	1.5553	1.11493	1.17298	1.19305	1.99511	1.20673
COL18A1	0.649559	1.31236	0.744666	0.965407	1.00272	1.03187	0.973821	1.02376	0.915152	0.776849	0.831685	1.06424	1.41352	0.771194	1.49304	0.623328	0.724394
COL19A1	0.443042	1.93365	0.829341	1.05195	0.882221	1.06583	1.06536	0.621331	1.04481	0.678572	1.07617	1.43922	0.58003	0.798612	0.694929	0.416696	0.842654
COL1A1	1.27485	1.53549	1.12196	1.25479	0.966768	0.77844	0.957623	1.25481	1.0513	1.07971	0.782122	1.26946	2.9684	2.5852	3.96188	0.903053	1.87915
COL1A2	1.00193	1.26736	0.849739	1.12336	1.02727	0.849376	1.1419	0.973777	0.900578	1.08493	0.726332	1.07355	1.20192	1.18873	0.928214	1.56191	0.906589
COL20A1	1.33139	1.61226	1.10995	0.978875	0.93674	1.08438	0.927878	1.07354	1.14564	1.16993	0.955044	1.45811	1.18888	1.26393	1.03741	1.25864	1.09438
COL21A1	2.05145	1.95942	2.49911	1.0488	0.89395	1.05725	0.667438	1.66754	1.20243	1.90977	0.913684	1.71278	0.781784	0.94842	0.787474	2.00935	0.924459
COL22A1	1.3209	1.66758	1.55214	1.04324	0.785445	1.17132	0.910874	1.00722	1.48659	1.43156	1.19532	1.93567	0.790967	0.95432	0.797781	1.21329	1.08461
COL23A1	1.20506	2.35426	1.2633	0.830593	0.934589	1.23482	0.918624	1.00276	1.59949	0.972124	0.837073	2.53539	1.23291	1.07569	1.11112	1.0678	1.50707
COL24A1	0.446546	1.88282	0.560873	0.920074	0.90707	1.17286	0.593804	0.268653	1.5665	0.388704	1.03176	2.23308	0.451172	0.486174	0.458553	0.461051	0.974006
COL25A1	0.915905	0.805956	0.95406	0.823309	0.816201	1.36049	0.689303	0.959697	0.814776	0.987425	0.611146	0.995387	0.975534	0.870873	1.17129	0.904816	0.762314
COL27A1	1.32263	0.981724	1.87485	0.688866	0.948527	1.36261	1.10871	1.39539	0.993183	1.88634	0.84782	1.06762	0.833276	0.951741	0.978996	1.54878	1.14531
COL2A1	1.46015	1.15795	1.13737	0.701306	0.831845	1.46685	0.747155	1.37757	1.08734	1.97312	0.683703	1.3303	0.874662	0.904769	1.04264	1.14669	0.942605
COL3A1	1.16664	4.01784	1.47145	0.134169	1.27769	1.58814	1.28755	1.08147	3.39924	0.804713	1.27039	4.28959	0.448096	0.0148175	0.545859	1.15361	1.66867
COL4A1	1.53817	0.845604	1.37377	0.894698	0.769976	1.33533	1.03434	1.37679	1.05895	1.53776	0.679345	0.628565	1.28153	0.979854	1.24158	1.21035	1.06058
COL4A2	0.394173	1.07409	0.352892	0.771017	0.921132	1.30785	1.57463	0.498499	0.930755	0.406584	0.576217	0.412827	0.642719	0.433119	0.471625	0.549866	0.447073
COL4A3	0.939384	0.8334	0.867956	0.713751	0.679832	1.60642	0.951157	0.948834	1.08035	0.925586	0.81764	0.743814	0.906346	0.94405	0.91744	0.682675	1.03622
COL4A4	0.508127	0.41744	0.634799	0.649376	0.808452	1.54217	0.890606	0.555962	0.638552	0.561323	0.622419	0.293819	0.621624	0.374375	0.412105	0.37977	0.66887
COL4A5	0.991808	0.822821	0.916653	0.949808	1.08484	0.965357	0.941306	0.891085	1.02284	0.672448	0.676874	0.709067	1.06417	1.33994	1.45692	0.643876	1.17562
COL4A6	1.61581	1.10397	1.81536	0.68769	1.08409	1.22822	1.16854	1.45394	1.00669	2.30404	0.548281	0.671999	0.82453	0.84725	0.974578	1.82559	0.930225
COL5A2	0.597291	0.326672	1.08658	0.823063	1.14047	1.03647	0.591232	0.982324	0.367869	0.804587	0.142815	0.235256	0.378163	0.429961	0.461725	0.974624	0.6548
COL5A3	1.29422	0.79829	1.20615	1.24297	1.13064	0.626385	1.13025	1.64188	0.943553	0.791622	0.497194	0.647174	1.5248	1.56964	1.70764	1.13546	1.27874
COL6A1	1.18041	0.843993	0.866795	1.07456	0.853199	1.07224	0.914598	0.917987	1.15068	0.997497	0.77088	0.844167	1.01509	1.72095	1.1384	0.976536	1.1486
COL6A2	1.81719	1.06036	1.09111	0.835633	0.997904	1.16646	1.11878	1.47973	0.919418	2.01245	0.455979	0.622784	0.999544	1.24836	1.14159	1.65319	1.23572
COL6A3	0.930664	0.833419	1.23696	0.710742	1.21316	1.0761	0.725713	1.118	0.963661	1.32768	0.694319	0.795707	0.489574	0.594693	0.598868	1.20349	0.761758
COL7A1	0.33932	0.897598	0.571224	0.795679	1.25492	0.9494	1.02643	0.410505	1.08613	0.482391	1.11317	0.889141	0.341286	0.753287	0.51722	0.367077	0.654345
COL8A1	1.73131	1.78893	2.85813	0.781102	1.35249	0.866409	1.77492	2.1179	1.92218	2.5799	1.32699	1.6043	1.06005	0.95087	1.23774	2.29456	1.38913
COL8A2	0.600731	0.858715	0.52681	0.657371	0.99234	1.35029	0.847537	0.376167	0.942693	0.327036	1.05849	0.95937	0.318903	0.694828	0.548382	1.37307	0.675999
COL9A1	1.02944	1.09508	0.500025	0.940467	1.05643	1.00311	1.16008	0.785282	0.78215	0.850292	0.578828	0.746803	1.21582	1.13532	1.20228	0.900859	1.12456
COL9A2	0.474294	0.84724	0.474	0.875636	0.846893	1.27747	0.744376	0.388699	0.82602	0.45495	0.838008	0.948909	0.794246	0.888399	0.704339	0.431907	0.907029
COL9A3	1.12153	0.723613	0.970321	1.24845	0.852776	0.898777	0.748384	0.95515	0.818241	2.28123	0.718161	0.769958	0.967365	1.18195	1.39346	0.923074	0.954544
COPS5	1.62258	1.0639	1.8879	0.718533	0.746924	1.53454	0.869393	1.7147	1.09443	2.80977	1.07775	1.51197	0.534847	0.311825	0.516477	1.40362	1.13935
CRADD	2.2844	0.877965	1.92523	1.09753	0.894358	1.00811	0.84092	2.27903	0.790692	1.81689	0.523312	1.03849	1.21904	1.35638	1.97474	1.98605	1.15211
CREB1	1.79397	0.249462	2.36972	1.04105	1.14139	0.817566	0.270315	1.3041	0.178525	2.02152	0.138158	0.200093	1.16871	1.054	1.14939	1.26374	1.5878
CREB3L4	0.853854	1.10201	1.05446	0.801908	0.955224	1.24287	1.12646	0.803541	1.13725	0.738616	1.09688	1.39051	1.02686	0.743465	0.90338	0.741707	1.09934
CREBBP	0.905903	0.844974	1.03594	0.8971	0.966324	1.13658	0.89701	0.748166	1.05433	0.931486	1.48	1.45359	0.640047	0.911762	0.713246	0.879595	1.05549
CREM	0.611025	0.376617	0.755375	0.776514	0.829524	1.39396	0.337427	0.471483	0.459958	0.496981	0.635664	1.47596	0.0158323	0.00819178	0.166194	0.590321	0.67179
CRHR1	0.768031	1.51768	0.939038	0.838259	0.912487	1.24925	1.39715	0.603889	1.85301	0.944585	1.89652	2.15181	0.887748	1.05143	0.871143	0.780177	1.46576
CRHR2	1.21787	1.44395	1.64893	0.974037	0.736212	1.28975	1.33129	1.08802	1.80298	1.28303	1.66934	2.33868	0.910292	0.891406	0.678928	1.12906	1.3668
CRK	0.663146	1.26525	0.807832	0.929938	0.93334	1.13672	1.21452	0.748103	1.54895	0.872762	1.56875	1.78819	0.882181	0.910097	0.891414	0.529677	1.16378
CRKL	1.48268	0.778357	1.17251	1.34265	0.580421	1.07692	0.783674	1.48549	0.890333	1.45808	0.753431	1.05551	1.49077	1.47255	1.50068	1.05762	1.10855
CRP	1.01764	0.564751	0.808096	1.12314	0.837317	1.03954	0.642424	0.968979	0.52507	1.87813	0.351099	0.492692	1.25728	1.01079	1.17815	0.825123	0.691549
CRY1	0.834187	1.08046	1.10885	0.876492	0.827427	1.29608	0.968573	0.900758	1.33162	1.28253	1.07892	1.4307	0.724956	0.834612	0.858847	0.897938	0.829057
CRY2	1.0598	0.971867	1.02265	1.13477	0.529129	1.3361	0.965661	1.35691	1.07794	1.19281	0.736605	1.13034	1.42181	0.985908	1.1475	1.01314	0.759124
CSF1	0.886556	0.731477	0.752284	0.89985	0.946443	1.15371	0.692042	0.922802	0.66743	0.948486	0.626959	0.878819	0.986429	0.856811	1.36209	0.815976	0.770264
CSF1R	1.46656	1.14554	1.77068	0.832059	1.13986	1.02808	1.18527	1.48244	1.13268	2.01366	0.593557	0.976628	0.984605	1.043	1.0958	1.84417	1.00912
CSF2	1.1773	0.930968	0.866718	0.85684	0.903844	1.23932	0.801222	0.75018	0.901595	0.972132	0.808868	1.06043	0.707894	0.998911	0.720462	0.91994	0.700169
CSF2RA	2.51103	0.694539	3.00425	0.983157	1.15976	0.857088	0.699956	2.09213	0.409379	2.38487	0.191118	0.429268	1.44989	1.30099	1.29091	1.82296	1.4901
CSF2RB	2.38857	0.944908	1.46959	1.07388	0.958526	0.967591	0.757674	1.98534	0.725408	1.50548	0.704364	0.945154	2.13111	2.45788	2.04764	1.45662	1.62189
CSF3	1.04914	1.21695	0.800171	0.969369	0.984098	1.04653	0.968632	0.816014	1.02973	0.873439	0.915074	1.21051	1.18704	1.2878	1.39377	0.897987	1.10672
CSF3R	1.13426	0.691021	0.847552	0.849743	1.11166	1.0386	1.12721	0.884042	0.439183	1.1317	0.286891	0.702893	1.45273	1.05181	1.26416	1.15475	1.35376
CSK	0.329528	1.34748	0.336337	0.847681	0.840263	1.31206	0.886191	0.231437	0.860512	0.25628	0.681277	1.20589	0.667431	0.851893	0.562872	0.225918	0.814973
CSNK1A1	1.63848	1.17597	2.2287	0.726234	1.02812	1.24564	1.36194	1.78315	1.21512	2.61495	0.626521	1.16385	1.02181	1.08093	1.10572	2.05281	1.16092
CSNK1D	0.726721	0.818479	0.791046	0.860366	0.834456	1.30518	1.24083	0.953692	1.33949	0.36815	0.579897	1.07073	1.08058	1.39984	0.917738	1.27529	1.10364
CSNK1E	0.7959	1.16724	0.690403	0.966228	0.900251	1.13352	0.699652	0.79295	0.705889	0.486235	0.600193	0.858237	1.07399	1.10172	1.37486	0.737369	0.926133
CSNK1G1	0.969555	0.967077	0.483079	0.568774	1.08349	1.34773	1.12373	0.519942	0.814349	0.465206	0.517734	0.829147	0.907374	0.793715	0.912967	1.96709	0.63939
CSNK1G2	0.878544	1.40351	1.17617	0.909925	0.9483	1.14177	0.581968	0.937219	0.636794	0.750311	0.729591	0.840827	0.667423	0.863273	0.569002	1.06367	0.695073
CSNK1G3	1.34977	0.663518	0.752625	0.638043	0.961874	1.40008	0.726635	0.979339	0.527677	0.916868	0.357997	0.502939	1.09345	1.1103	1.04087	1.39506	0.893734
CSNK2A1	0.700624	1.82896	0.677717	0.957744	0.803938	1.23832	0.828099	0.598122	1.01071	0.721435	1.11735	1.20239	0.665221	0.759104	0.824738	0.628721	1.04783
CSNK2A2	0.845013	1.3375	0.724393	1.07206	0.82425	1.10369	0.575549	0.978839	0.816678	0.546267	0.80717	1.17674	1.4884	1.29425	1.66553	0.546515	1.13123
CSNK2B	0.871733	1.96903	0.772914	0.841114	0.971405	1.18748	1.05964	0.837906	1.58263	0.879663	1.33207	1.58681	1.1045	1.43072	1.13445	0.601228	1.2744
CTBP1	1.17588	1.01701	0.74857	0.864421	1.07868	1.0569	0.876336	0.895534	0.720437	0.934224	0.523847	0.77984	1.90164	1.55217	1.72732	1.22538	1.18042
CTBP2	1.94331	0.825195	1.36644	0.693393	0.825725	1.48088	0.997953	1.64611	0.783757	2.53125	0.474837	0.774061	1.04819	1.38641	0.98967	1.623	1.04307
CTGF	1.02921	2.02752	1.18443	0.924765	0.832317	1.24292	0.993328	1.8412	1.57846	0.960359	1.10034	2.20055	1.02532	0.995788	0.948345	1.18317	1.11452
CTLA4	0.968327	0.531831	0.693546	0.958687	0.559197	1.48212	0.411157	0.831269	0.456627	1.87662	0.315857	0.559818	1.24867	1.01155	1.38606	0.636922	0.848147
CTNNA1	0.884758	1.5523	0.889269	0.516353	0.938621	1.54503	1.00221	0.999803	1.29201	0.82264	0.967735	1.66934	1.56504	1.41582	1.6445	0.803189	1.28604
CTNNB1	1.43361	2.10752	2.55635	0.431077	1.37092	1.198	1.31512	1.8371	2.12093	2.00086	1.56864	2.39655	0.738416	0.848107	0.981819	1.4783	1.21327
CUL2	1.48171	0.0165576	1.75922	1.20922	0.437351	1.35343	0.583824	1.29308	0.0234433	1.40178	0.0297364	0.0163334	0.257155	0.164807	0.0928763	1.38464	0.374371
CX3CL1	1.32555	1.08568	1.08291	0.86621	0.538577	1.59521	1.11066	0.733367	1.34018	0.968373	0.988826	0.805324	1.00681	0.888545	0.993088	1.0802	1.23778
CX3CR1	0.64246	0.709406	0.714319	0.681867	0.85174	1.46639	0.771566	0.578043	0.565322	0.508967	0.61553	0.38919	0.534366	0.692639	0.50575	1.14675	0.529735
CXCL1	0.716108	0.685954	0.730805	0.596982	0.861581	1.54144	0.795569	0.568666	0.855719	0.794669	0.792549	0.682924	0.501519	0.43049	0.430153	1.01516	0.747679
CXCL10	0.857097	1.16025	0.545131	0.763498	1.12795	1.10855	1.17666	0.540011	0.944014	0.468391	0.658803	0.701854	0.968152	0.930186	0.915377	0.884753	1.0474
CXCL11	0.418601	0.760105	0.672206	0.853676	1.1227	1.02363	0.842364	0.34218	0.912191	0.531606	0.789453	0.613969	0.49641	0.725369	0.564875	0.543343	0.717778
CXCL12	1.4331	0.804424	1.81602	0.930228	1.03576	1.03401	0.993003	1.38729	1.04236	1.80349	0.733927	0.711766	0.961281	0.959581	1.23435	1.54621	1.10371
CXCL13	1.06328	0.923189	0.950569	1.20123	1.02467	0.774105	1.07957	1.18514	1.02888	0.72196	0.651819	0.785173	1.74951	1.22949	2.38528	1.0992	1.446
CXCL14	0.720843	0.999565	0.620232	0.804337	1.04603	1.14963	1.07528	0.855434	0.956877	0.526575	0.384324	0.830804	0.801679	0.811159	0.741108	1.18418	0.861754
CXCL16	0.931009	1.10162	0.781694	0.944499	0.96301	1.09249	1.17169	0.682777	1.35264	0.874214	1.14494	1.08752	0.847472	1.20417	0.902497	0.843449	1.09067
CXCL2	0.52038	0.945534	0.69223	0.716124	1.27842	1.00545	1.00016	0.453764	1.11204	0.595721	1.39971	1.04852	0.414504	0.529436	0.529162	0.639679	0.772939
CXCL3	0.612474	1.03755	0.886954	0.723084	1.22991	1.047	1.03512	0.573994	1.54804	0.41135	1.31545	1.07889	0.192031	0.381359	0.263089	0.708521	0.73534
CXCL5	1.19808	0.84725	0.642578	0.908447	1.02978	1.06177	0.872222	0.885986	0.794952	0.499516	0.56027	0.62542	1.21495	1.47429	1.19158	1.32144	0.92803
CXCL6	0.693804	0.330478	0.55545	1.14426	1.15529	0.700454	0.576871	0.692896	0.393417	0.245013	0.219624	0.234716	1.05796	1.06152	1.64222	0.49655	0.493775
CXCL8	0.437861	0.681091	0.506147	0.570833	1.02662	1.40255	0.623055	0.40863	0.846549	0.474243	0.805535	0.907234	0.474612	0.460205	0.443978	0.450407	0.764439
CXCL9	0.835435	0.863345	0.726591	0.774187	0.807739	1.41807	0.75369	0.584018	1.0092	0.790087	1.22958	1.05842	0.672244	0.923372	0.834437	0.708305	1.00977
CXCR1	1.61934	0.985807	1.44989	0.985995	0.90311	1.1109	0.861354	1.9454	0.956196	1.2909	0.788438	1.07778	1.02067	0.655001	1.06206	1.20282	1.04188
CXCR2	1.79915	1.03361	1.55175	1.02416	0.82398	1.15186	0.992883	2.18786	1.05721	1.60065	0.706214	1.15832	2.21419	1.24772	2.95376	1.25071	1.45743
CXCR3	0.560529	1.02229	0.673092	0.781745	0.904937	1.31332	0.890552	0.49895	1.22696	0.696898	1.32348	1.42099	0.576484	0.603661	0.622405	0.469862	1.14081
CXCR4	1.08095	0.703041	1.23305	1.17702	0.511442	1.31153	0.500194	1.29676	0.657761	1.19791	0.592674	1.08782	0.35025	0.311048	0.226103	0.806494	0.893024
CXCR5	0.928557	0.877696	0.803273	0.83209	0.945204	1.22271	0.84667	0.813619	0.944496	1.06438	0.889479	0.997873	0.697121	1.028	0.742029	1.13261	0.889855
CXCR6	1.68668	1.30701	1.79696	0.81031	0.989845	1.19984	1.31239	1.48955	1.46206	2.06623	0.803392	1.03013	0.91569	1.04567	1.06065	1.75034	1.10707
CYCS	0.820057	0.839084	0.942428	0.739796	1.06604	1.19416	0.758444	0.722115	0.861857	1.0063	1.23238	1.15983	0.365475	0.470537	0.459681	0.840715	0.727258
CYP17A1	1.71645	1.36182	3.24662	1.03078	0.882755	1.08647	1.40029	2.39233	1.07922	2.88295	0.343916	1.06737	1.31737	1.04354	1.21796	2.7194	1.30414
CYP19A1	0.48144	1.47339	0.473101	0.948353	1.22744	0.824211	1.57551	0.655426	1.67885	0.77279	0.847596	1.31376	1.03184	0.886594	0.90812	0.859163	0.707894
CYP2C19	1.06801	0.779341	1.06013	1.0402	0.880139	1.07966	0.667036	0.818772	0.766582	0.954402	0.804966	1.17738	0.424757	0.409679	0.376726	1.0561	0.678425
DAAM1	1.03128	0.666868	2.23296	0.875371	0.872877	1.25175	0.3734	1.86004	0.535927	1.5424	0.609373	0.91802	0.211861	0.424441	0.363865	0.957951	0.263705
DAAM2	0.994287	0.636583	0.719638	1.09492	0.724186	1.1809	0.461606	1.24336	0.502921	1.15557	0.176916	0.75045	0.83551	0.659808	0.930886	0.73627	0.415547
DAP	1.8805	1.19626	2.85427	0.716899	1.17425	1.10885	1.35655	2.01962	1.46986	3.26348	1.16758	1.32822	0.768668	0.978922	0.89926	2.06547	0.973286
DAPK3	1.17874	1.41548	1.64519	0.796236	0.969133	1.23463	0.999347	1.31755	1.13532	1.73706	1.12564	1.38293	0.939982	0.80819	0.866452	1.13313	0.829136
DAXX	0.988059	1.22866	0.747312	1.06802	1.00296	0.929023	0.866205	0.993858	0.83492	0.630775	0.905294	1.15616	1.16834	1.33757	1.20471	0.72562	1.23877
DBT	0.75698	0.957873	0.960895	0.883016	1.06326	1.05372	0.579576	0.68085	0.513273	0.501673	0.594887	0.829255	0.691968	0.862644	0.561557	0.465351	0.687962
DCC	0.68166	0.482716	0.465196	0.740108	0.977811	1.28208	0.629698	0.855467	0.410002	0.932582	0.274025	0.35546	0.644024	0.671689	0.620605	0.812289	0.545047
DCHS1	0.479726	1.45727	0.541178	0.721325	1.10813	1.17055	0.845193	0.443232	1.05275	0.448594	1.11702	1.03682	0.34593	0.493357	0.443956	0.523612	0.559498
DCX	0.55631	1.66186	0.520834	0.842319	1.20464	0.953038	1.10742	0.414049	0.909126	0.481596	0.904888	0.999833	1.00686	0.70113	1.09263	1.0288	0.767163
DDIT3	0.862969	1.05153	0.719961	0.976741	0.908657	1.1146	0.799231	0.90813	0.838018	0.831596	0.748539	0.808376	1.47608	1.21904	1.45778	0.873536	1.06991
DDIT4	0.724039	1.64444	0.702907	0.924131	0.958289	1.11758	0.75552	0.690166	0.947111	0.557976	1.10369	0.989752	0.720423	0.905649	0.753257	0.803652	0.831978
DDR1	1.25204	0.751218	0.904704	0.855447	0.718747	1.42581	0.795064	1.3513	0.53449	0.624591	0.402924	0.467657	1.83225	1.90746	1.1771	1.25429	0.912466
DDR2	0.725634	1.38441	0.657528	0.920477	0.944294	1.13523	0.739317	0.715133	0.873628	0.603748	0.960537	0.851083	1.14984	1.15696	1.13563	0.728119	0.926599
DDX17	1.16058	1.6654	0.90074	0.896684	0.796283	1.30703	0.78171	0.714238	1.04566	1.23478	1.09841	1.10809	0.75706	0.815865	0.821633	0.844037	1.03395
DFFA	1.24522	0.702012	0.810359	0.942168	0.751891	1.30594	0.536549	0.989192	0.611161	2.44075	0.457902	0.557619	1.24498	1.34991	1.32991	0.779052	1.09465
DFFB	0.414867	1.92194	0.549006	0.608328	0.999218	1.39245	1.01008	0.411151	1.51593	0.667318	1.20972	1.48869	0.908499	1.17143	1.08178	0.370066	1.25304
DGKZ	0.82486	1.976	1.01462	0.643021	1.06827	1.28871	1.24864	0.906418	1.75021	1.05867	1.50927	1.71033	1.01807	1.28094	1.16786	0.595743	1.43508
DHH	0.948063	2.72474	1.6558	0.406532	1.25689	1.33658	1.30879	1.23102	2.39628	1.28471	1.97648	2.90771	0.818416	1.00537	0.838548	1.13588	1.53568
DIABLO	1.22226	1.12463	1.21973	0.660011	0.905992	1.434	0.953166	1.58519	1.00586	1.39085	0.705795	1.27219	1.7066	1.36592	1.68824	0.969347	1.06294
DIRAS3	1.48534	1.01856	1.78126	0.65745	0.915395	1.42715	1.46189	1.65836	0.704963	2.30616	0.551412	0.857468	1.02162	1.12935	1.11111	1.63133	1.23685
DKK1	1.86996	0.297658	2.70197	0.691475	0.944443	1.36408	0.644233	1.67604	0.558235	2.73132	0.327798	0.0151291	0.332425	0.0967077	0.286267	1.8184	0.438107
DKK2	0.846555	0.581866	1.37949	0.701758	0.889432	1.40881	0.9487	0.900375	0.752936	1.25717	0.93074	0.364369	0.453141	0.439474	0.337943	0.909667	0.606512
DKK4	0.424989	0.68453	0.517951	0.62849	0.765777	1.60573	0.892149	0.424593	0.806446	0.498098	0.725583	0.541346	0.569019	0.610647	0.650511	0.444385	0.619717
DLG4	1.21794	0.79063	0.601944	0.895399	1.12495	0.979656	1.10724	0.834365	0.608406	0.985025	0.282039	0.482451	1.28249	1.27247	1.14784	0.997156	1.08655
DOCK1	3.10136	0.879261	2.29052	1.14474	1.19063	0.664634	1.15697	2.7221	0.993112	2.55258	0.340926	0.584699	1.43564	1.106	1.8838	2.32218	1.25423
DOK1	1.31728	1.58844	1.74465	0.740047	1.25182	1.00814	1.6105	1.99457	2.02016	1.29762	0.838219	0.848977	1.07145	0.810654	1.07275	1.39927	1.13848
DOK2	0.72955	1.00404	0.767306	1.04279	1.21928	0.737927	1.37481	1.10351	1.11246	0.828769	0.65386	0.801206	1.37682	0.811371	1.56405	0.762676	0.941701
DOK3	1.05123	1.01889	1.02677	0.950362	1.07254	0.977095	1.13637	0.958971	1.22511	0.912071	0.941986	1.07182	1.03593	1.09684	1.25041	0.847341	1.31746
DOK4	1.64403	0.963598	1.1676	1.33991	0.983306	0.676785	1.12081	1.3532	0.964188	1.64591	0.597069	0.681728	1.80356	1.43104	2.30879	1.27309	1.33092
DOK5	0.920405	1.0516	1.02852	0.892925	1.15463	0.952447	1.09488	0.737286	1.49004	0.904927	1.48971	1.07809	0.661853	0.9477	0.802976	1.02306	1.00186
DOK6	0.662571	0.800202	0.726313	0.631218	1.15341	1.21537	0.710883	0.481223	1.07125	0.586979	0.943138	0.885121	0.429095	0.550906	0.517029	0.871937	0.936018
DSCAM	1.13149	0.983218	0.903798	0.81616	0.944515	1.23932	0.98179	0.818297	1.28547	0.816169	1.05261	1.05326	1.05666	0.964314	1.15192	0.749704	1.10294
DUSP1	1.5438	0.453091	1.39226	0.933965	0.787494	1.27854	0.407377	1.32766	0.49586	1.27825	0.358135	0.504598	0.597858	0.614937	0.813094	1.25168	0.698555
DUSP10	1.50271	1.18099	0.720999	0.843786	1.13283	1.02338	1.32232	0.990679	1.07783	0.65167	0.679637	0.959993	1.70036	1.63692	1.5743	1.9181	1.53932
DUSP14	0.662459	0.757514	0.861139	0.721927	0.84337	1.4347	0.710833	0.57763	0.959005	0.805257	1.09579	0.830037	0.359465	0.512237	0.470951	0.719098	0.670986
DUSP16	1.1239	0.955548	0.884318	0.892353	0.85576	1.25189	0.839917	0.722509	1.03213	1.10466	1.20243	1.07712	0.619798	0.763499	0.750653	1.49851	0.960219
DUSP3	1.59762	0.261813	1.29909	1.63007	1.00431	0.365619	0.316898	1.1812	0.239036	2.96392	0.16347	0.205673	1.55685	1.40029	1.23328	0.848117	0.863661
DUSP4	0.957474	0.835346	0.696386	0.830732	1.06054	1.10873	0.801756	0.593319	0.84614	0.793811	0.860266	0.847502	0.772923	0.854686	0.765417	1.21493	0.864799
DUSP6	1.28885	0.762283	2.30301	0.668415	1.2479	1.08369	0.845865	0.965837	0.678752	2.09147	0.486109	0.641394	0.550185	0.450285	0.585855	1.33794	0.468203
DUSP7	0.681013	0.925057	0.75334	0.810794	0.859343	1.32986	0.934925	0.707921	0.983548	0.771894	0.95115	0.99662	1.12816	1.08929	1.08441	0.592946	1.14722
DUSP9	0.766242	0.773873	0.831228	1.05121	0.858892	1.0899	0.750299	0.773753	0.829338	0.938547	0.750753	0.789128	1.02815	0.815775	1.03087	0.781838	0.897834
DVL1	1.61392	0.556328	0.889478	1.26403	0.761761	0.974206	0.59158	1.29652	0.672831	1.93883	0.472057	0.621457	1.0349	1.17555	1.05	0.95296	0.84129
DVL2	0.931654	1.21433	1.15476	0.899084	1.034	1.06692	0.950531	0.937663	1.46396	1.15586	1.92496	1.38164	0.635184	0.832525	0.694616	0.775628	0.955981
DVL3	0.672811	0.750255	1.45053	1.26065	0.863746	0.8756	0.667849	1.36552	0.908886	0.620463	1.16265	0.884963	0.752185	0.888048	0.763236	0.542279	0.690302
DYNLL1	1.82078	0.988696	1.35056	0.892938	0.553572	1.55349	0.569181	2.42993	1.19831	2.8119	1.20293	1.19908	0.665571	0.57933	1.01141	1.20136	0.943368
DYNLL2	1.74658	0.860672	2.57859	0.847519	0.948521	1.20396	0.817837	1.95657	0.968509	2.50843	1.03183	1.05657	1.00954	0.675948	0.774845	1.72358	0.863705
ECM1	0.634138	0.657581	0.596484	0.695005	1.05142	1.25357	0.695143	0.734939	0.456571	0.634832	0.305271	0.50315	0.889556	0.634645	0.808459	0.786447	0.723245
ECM2	0.343348	0.766166	0.550544	0.925664	0.960949	1.11339	0.60687	0.346635	0.804232	0.320796	0.857509	0.8511	0.48903	0.651303	0.55996	0.295288	0.54842
EFEMP1	0.681468	0.478812	0.340982	1.1125	1.05853	0.82897	0.535211	0.387088	0.442172	1.07553	0.390733	0.435511	1.14905	1.10109	0.993487	0.504716	0.753923
EFEMP2	0.502759	1.16468	0.463715	0.835608	0.793146	1.37125	0.928291	0.362393	1.19879	0.59517	1.2273	1.33398	0.751092	0.82288	0.77362	0.519439	0.885992
EGF	0.422799	1.04906	0.577793	0.772555	0.929692	1.29775	0.786646	0.500053	0.894694	0.513455	1.07666	1.08527	0.60609	0.401563	0.460646	0.586029	0.55861
EGFR	0.448849	1.06411	0.504383	0.769939	0.799464	1.4306	0.587772	0.51623	0.858398	0.344668	0.98188	1.01023	0.401429	0.543442	0.378378	0.655223	0.434727
EGLN1	1.0063	1.16341	0.580979	0.74854	1.1308	1.12066	0.864256	1.05265	1.00434	0.708	0.968274	1.07949	1.10855	1.47418	0.959678	1.03969	1.24458
EGLN2	0.644786	0.906309	0.692187	1.13623	1.00422	0.859546	0.792907	0.784188	0.766377	0.674825	0.694699	0.89009	1.41382	0.990612	1.53423	0.67694	1.01048
EGR1	1.42579	0.748806	1.29211	0.917523	1.31243	0.770047	0.482321	1.27784	0.323818	0.9038	0.352726	0.600046	1.53498	1.01713	2.12134	1.24135	0.887381
EIF2A	1.51778	1.00086	1.97253	0.68556	1.19941	1.11503	1.14219	1.58198	0.881109	2.15817	0.603814	0.850365	0.898104	0.948134	0.973998	1.581	0.99477
EIF2AK3	1.85558	1.8769	3.09638	0.970868	0.956637	1.0725	0.809161	1.73722	0.918912	1.95372	1.17484	1.18947	0.466475	0.505291	0.671039	1.85051	0.964362
EIF2B1	0.863869	0.669247	0.545901	0.829811	1.00665	1.16354	0.534189	0.763875	0.431389	0.437777	0.357754	0.41078	1.62989	1.15138	1.37719	0.776562	1.09283
EIF2B2	0.807706	1.72577	0.925446	0.719457	1.02922	1.25132	0.749928	0.580245	0.918229	0.769495	1.05482	0.889262	0.549318	0.779563	0.738735	0.864059	0.843968
EIF2B3	1.03443	1.44003	1.17246	0.702942	1.16937	1.12769	0.82781	1.02668	0.956701	0.985319	1.04118	0.928646	0.946051	0.896979	1.05707	1.04934	1.07825
EIF2B4	1.35284	0.74069	0.692044	0.706272	0.951785	1.34194	0.818062	0.976144	0.628256	1.10223	0.455565	0.564849	1.18528	1.09821	0.98142	1.59836	0.884449
EIF2B5	0.975104	1.04757	0.785355	0.823662	0.921474	1.25486	0.774356	0.966254	0.874925	0.860084	0.806844	0.766995	1.18164	0.987136	1.10248	0.876907	1.05368
EIF2S1	0.814317	1.60247	1.11739	0.59721	0.968284	1.43451	0.950035	0.945893	1.22762	0.684772	1.39964	1.16553	0.538939	0.719159	0.521128	0.893297	0.837922
EIF2S2	0.765108	1.67344	0.523406	0.444817	0.811502	1.74368	0.903152	0.476204	1.06383	0.661716	0.843432	1.17899	1.09708	1.23198	1.07717	0.708653	1.2075
EIF2S3	1.00107	1.23654	0.964838	0.586657	0.962908	1.45044	0.96876	0.956545	1.01296	0.910953	0.960835	0.982196	1.31982	1.36391	1.11877	0.884959	1.02385
EIF3B	1.47145	0.969004	1.13163	0.953211	0.863521	1.18327	0.728741	1.5665	0.811318	1.06546	0.525796	0.860218	2.15633	2.05935	2.4017	1.03506	1.79345
EIF4A1	1.04881	1.37622	1.00957	0.624734	0.947051	1.42822	0.946848	1.31881	1.07015	1.80898	0.781502	1.35672	1.64089	1.37191	2.13691	0.790817	1.45356
EIF4A2	1.56569	1.02771	1.66041	0.627043	1.2278	1.14516	0.58379	1.68927	0.860786	2.56323	0.736778	1.00627	0.768291	0.859965	0.752057	1.45354	0.837909
EIF4B	1.82379	2.1878	2.98066	0.242352	1.28936	1.46828	1.16375	2.25372	1.87568	3.12132	1.27775	2.58213	0.644034	0.79356	0.813905	2.31459	1.52434
EIF4E	3.47749	0.423149	3.75939	0.594449	0.829447	1.5761	0.390249	2.20672	0.421392	2.51547	0.332361	0.502011	1.19484	1.73238	1.20023	2.26904	1.40595
EIF4EBP1	1.05695	1.65379	1.13958	0.751478	1.22237	1.02615	1.14173	1.07884	1.4935	0.980662	1.27333	1.67389	0.750977	0.816749	1.06412	0.821873	0.896169
ELF1	0.494068	0.602678	0.595169	0.8128	0.980139	1.20706	0.929203	0.493693	0.830427	0.530531	0.867958	0.525631	0.58083	0.636843	0.620277	0.465863	0.590241
ELK1	1.02639	0.894201	1.08144	0.831664	1.35906	0.809279	1.04335	1.31253	0.996711	0.940954	0.712969	0.654826	0.998507	0.751	1.06764	1.05077	0.956576
ELK3	1.94782	1.32446	1.28805	1.04088	1.17583	0.783295	1.37479	2.05664	1.30737	1.43634	0.643465	0.82155	1.37187	1.55622	1.50252	2.22768	1.54528
ELK4	1.67715	0.703585	1.02096	0.914288	1.45862	0.627092	0.92488	1.07092	0.496232	0.992748	0.339008	0.393483	1.17667	1.15869	0.956926	1.2814	0.830059
ELN	1.14066	0.976534	1.18494	1.08381	1.19994	0.716249	1.39117	1.24083	1.20262	0.934135	0.866376	0.863617	1.52968	1.14424	1.53305	1.15484	1.20777
ENDOG	1.14336	0.997012	0.84577	0.905895	1.20323	0.890878	1.18995	1.0962	1.08474	0.870003	0.894975	0.811622	0.659666	0.840683	0.722404	1.99165	0.860462
EP300	2.66908	0.872507	1.83548	1.13691	0.964676	0.89841	0.857821	1.73591	1.08554	2.43977	0.702957	0.824757	1.04455	1.60343	1.31626	2.19975	1.22954
EPHA1	1.48481	0.831529	1.99578	1.29402	0.882267	0.823713	0.945629	1.63519	0.97618	1.30026	0.65179	0.719993	2.03719	2.13949	2.17999	1.46645	1.58553
EPHA2	0.852361	0.961341	1.00388	0.780819	0.938182	1.281	0.938762	0.678346	1.18843	0.989572	1.10379	0.937848	0.64352	0.918373	0.709611	1.0831	0.861312
EPHA3	2.98285	0.475388	3.43676	1.02865	1.13224	0.839117	0.533572	2.07947	0.329502	2.07662	0.262577	0.251439	1.28516	1.70802	1.36817	2.1079	1.74119
EPHA4	1.35075	0.68623	0.765694	0.750751	0.954412	1.29484	0.719147	0.593461	0.759181	0.832697	0.812834	0.621622	0.439734	0.789159	0.474271	1.82379	0.532647
EPHA5	1.11696	1.56048	1.40936	1.426	0.754201	0.819796	1.66311	1.40584	2.18537	0.31837	0.678506	1.6103	1.62715	1.43419	1.49512	2.22796	1.94321
EPHA6	0.9021	0.943772	0.738446	0.864054	0.708776	1.42717	0.889414	0.736165	1.18414	0.838768	1.16661	0.993307	0.746055	1.17062	0.739886	0.748785	1.06286
EPHA7	0.810571	1.00488	0.931399	0.942465	0.910175	1.14736	1.04862	0.80555	0.944587	0.500059	1.08633	0.830195	0.585261	0.8309	0.650996	1.87911	0.68198
EPHA8	0.613013	0.67953	0.875244	0.676319	1.13744	1.18624	0.651015	0.630989	0.804413	0.753676	0.956157	0.760332	0.45581	0.566874	0.52745	0.633555	0.816423
EPHB1	1.22114	0.606939	1.1283	1.34173	0.879266	0.779007	0.677893	1.34784	0.609	1.14822	0.467743	0.498407	1.35609	1.00535	1.5932	1.09356	0.778569
EPHB2	0.415187	0.942446	0.727183	0.802962	0.990134	1.2069	0.933494	0.497131	1.11723	0.631446	1.21043	0.904803	0.562264	0.679936	0.735042	0.443992	0.933908
EPHB3	0.535804	0.861529	0.801154	0.867433	0.876736	1.25583	0.655928	0.762005	0.891815	0.678153	0.973685	0.916731	0.602837	0.567981	0.596423	0.443101	0.871748
EPHB4	0.566858	1.02802	0.60968	1.14399	0.961148	0.894858	1.03984	0.649471	1.02316	0.71243	1.1491	0.878693	1.06818	1.11427	0.866508	0.706432	0.843696
EPHB6	1.42762	0.619103	1.12395	1.25004	0.804401	0.945558	0.663772	1.27077	0.730974	2.03769	0.561533	0.613262	0.984606	1.04252	1.08653	1.10218	0.792009
EPO	1.19413	1.00202	1.13308	1.02866	0.913374	1.05796	0.992278	1.17642	1.23503	1.06594	1.23493	1.16281	1.54106	1.50545	1.73048	0.922722	1.29846
EPOR	1.0318	0.984659	0.881696	0.750465	1.11985	1.12969	0.951622	0.992386	1.07935	0.801219	1.17732	1.08173	1.13234	0.897949	1.11473	1.48357	1.0037
EPS8	0.419858	0.784734	0.545023	0.835004	1.01843	1.14657	0.520048	0.398691	0.814177	0.381471	1.2591	0.73683	0.359964	0.381174	0.340771	0.295339	0.466457
EPYC	1.52038	0.664307	0.709021	0.911714	1.0928	0.995491	0.624451	1.72213	0.632834	0.978233	0.62047	0.645098	1.54089	1.45997	1.76697	0.979878	1.49304
ERBB2	0.257235	0.991238	0.498186	0.861687	1.07232	1.06599	0.879516	0.272154	1.14107	0.494206	1.29377	1.10344	0.563472	0.757414	0.591786	0.228872	0.673628
ERBB3	1.34376	1.63703	2.13041	0.727714	1.19495	1.07733	1.8208	1.69547	1.83574	2.43148	1.3405	1.94722	1.21196	0.87782	1.28176	1.74577	1.20209
ERBB4	0.918771	0.79515	1.29617	0.769151	1.06801	1.16284	0.668006	0.993341	0.810267	1.18408	1.16582	0.913711	0.356787	0.362392	0.420683	1.19859	0.386717
EREG	0.262851	0.862212	0.547254	0.831298	0.685537	1.48317	0.685168	0.34185	0.694372	0.287118	1.07151	0.820477	0.314439	0.19654	0.178552	0.237956	0.345504
ESR2	0.856186	0.874323	0.680854	0.905539	0.932671	1.16179	0.712607	0.839791	0.719913	0.575818	0.788569	0.857827	1.25578	1.03736	1.36409	0.740756	0.96887
ETS1	0.817434	0.310957	0.708738	0.843846	1.43337	0.722784	0.147662	0.902857	0.068606	0.652313	0.0982807	0.253026	0.893522	0.785009	1.15346	0.588313	0.493702
ETS2	1.55566	1.02689	2.29067	0.900837	0.868332	1.23083	0.520122	1.74173	0.671077	1.95688	0.875791	0.825803	0.586335	0.535318	0.503784	1.53472	0.634503
EXO1	1.30553	1.12307	1.23212	0.816221	1.08386	1.09992	0.736798	1.17322	0.908819	1.25916	1.14081	0.919291	0.789233	0.975655	0.858563	1.32748	0.819569
F2	0.436862	0.959921	0.612046	0.790552	1.21433	0.995119	0.792878	0.490924	0.771689	0.450956	0.811915	0.836106	0.532535	0.614037	0.649236	0.290268	0.511314
F2RL3	1.59937	1.02194	2.23598	0.727604	1.21004	1.06236	1.13363	1.79773	1.05389	2.2453	0.524541	0.967101	0.977639	1.12464	1.04721	1.94115	1.15898
FADD	0.818802	1.26668	1.02201	0.826861	1.15857	1.01457	0.877793	0.98245	0.919062	0.796934	0.91832	0.940245	0.844865	0.632197	0.951417	0.791868	0.742855
FAS	0.579461	1.52162	0.682687	0.868103	1.10811	1.02378	0.503055	0.538989	0.864411	0.731542	1.0962	0.787794	0.460137	0.666707	0.484242	0.388235	0.672492
FASLG	0.707427	1.32003	0.551507	0.839694	1.1855	0.97481	0.980048	0.615681	0.952597	0.718733	0.940665	0.872414	1.27362	1.06628	1.02529	0.945263	1.07879
FASN	1.45782	0.570094	1.59982	0.772768	1.32185	0.905385	0.706857	1.18435	0.389334	1.06091	0.312799	0.340786	1.89732	2.32755	1.60295	1.04277	2.19507
FBLIM1	2.82752	1.7733	1.99164	0.595757	0.962712	1.44153	1.01462	1.787	1.08506	1.47878	1.03328	1.08319	1.33831	1.42093	1.24458	1.54033	1.54966
FBN1	0.51138	0.902769	0.60052	0.977384	1.18925	0.833365	0.552294	0.74149	0.455328	0.314986	0.493165	0.45043	1.49183	1.18486	1.35634	0.353671	0.951522
FBN2	1.35291	1.27703	1.07311	0.5648	1.02957	1.40563	0.969505	1.29184	0.989908	1.09281	0.958031	1.14918	1.51857	1.44641	1.39581	1.17863	1.41295
FBN3	1.73692	1.05948	1.69024	0.759953	0.999542	1.24051	0.921231	1.79201	0.95398	1.67265	0.831724	0.995159	1.89782	1.47008	1.74308	1.84803	1.36138
FBXW7	1.60174	1.83138	2.35658	0.771121	0.877882	1.351	2.34835	2.22658	1.14848	1.15939	0.627029	2.16728	2.62276	2.43202	3.02574	2.3344	2.52397
FCGR1A	0.97083	1.32225	0.803508	0.566072	1.08098	1.35295	0.995138	0.814344	0.984562	0.822044	0.986281	1.06391	1.21831	1.24562	1.5013	0.885584	1.10851
FCGR3A	0.645363	0.938506	0.731151	0.775684	0.973136	1.25118	1.069	0.805964	0.602179	1.07995	0.434962	0.74867	1.07387	0.938748	1.10817	0.931375	1.06935
FEN1	1.31438	0.809489	0.895883	0.753269	0.92589	1.32084	0.603149	1.10865	0.705332	2.20521	0.56655	0.674044	0.770422	0.89292	0.969136	1.03068	0.724015
FERMT2	0.504274	1.81083	0.554902	0.580145	1.01398	1.40587	1.66683	0.564312	1.67901	0.52544	1.33038	1.91923	1.18379	1.15733	0.89819	0.667689	1.14953
FGF1	2.07707	0.614802	1.99814	0.655016	0.98862	1.35636	0.763444	1.97693	0.390224	1.75038	0.249225	0.490489	1.22982	1.41274	1.28773	2.34298	1.58052
FGF10	1.76278	1.27211	2.01442	0.960049	1.0628	0.977147	1.02482	1.98914	1.16796	2.18381	1.1608	1.27615	1.44245	1.12824	1.5823	1.77033	1.29475
FGF11	1.75366	1.37999	2.28222	0.617002	1.2007	1.1823	1.45661	1.88681	1.53935	2.80325	1.11799	0.858617	0.635534	0.72976	0.739994	1.97168	0.734909
FGF12	0.97124	1.01074	0.88026	0.751564	1.17089	1.07755	1.02631	0.925454	0.824367	0.906762	0.593324	0.560362	0.698008	0.863626	0.737845	1.41084	0.680233
FGF13	0.909148	0.407655	1.16495	0.526431	0.776527	1.69704	0.555167	0.799022	0.452522	0.989482	0.479059	0.235293	0.202691	0.194482	0.203011	1.08233	0.336876
FGF14	0.664762	0.238889	0.722867	0.662322	1.06282	1.27486	0.51513	0.479589	0.443618	0.509471	0.388042	0.162099	0.31625	0.223683	0.296245	0.67204	0.640188
FGF16	0.983269	1.3456	0.967729	0.895991	1.0987	1.00531	1.44666	0.700718	1.50574	0.999405	1.25672	1.18258	1.07513	0.872231	1.03056	1.20683	1.26647
FGF17	1.78467	0.950237	1.60121	1.00803	1.13209	0.859883	1.1263	1.36507	0.984166	1.66789	0.638219	0.693117	1.31544	1.10259	1.43775	1.81563	1.3518
FGF18	2.41315	1.82233	2.81249	0.890939	0.901664	1.2074	1.88297	2.27052	1.91493	3.3833	1.12328	1.23135	1.00702	1.18914	1.21677	2.55969	1.29033
FGF19	1.66781	1.12104	2.45452	0.838468	1.24816	0.913376	1.44594	1.85159	1.42699	1.33054	1.097	0.879852	0.797201	0.97969	1.03142	1.89211	1.14574
FGF2	1.00328	0.587713	0.858866	0.951682	1.3076	0.740715	0.78337	0.882266	0.728424	0.791373	0.3346	0.512881	0.518872	0.639465	0.678241	1.0278	0.71789
FGF20	1.27541	0.481012	0.857718	1.21736	1.04368	0.738962	0.67604	1.12429	0.515208	1.87174	0.264185	0.389652	0.867024	0.80238	1.1494	0.897307	0.722011
FGF21	1.03596	1.07002	0.742106	1.09757	1.14257	0.759862	1.23429	0.929939	0.948553	1.13889	0.681946	0.749425	1.37531	1.39128	1.20197	1.08666	1.23603
FGF22	1.00236	0.604963	0.885865	0.80621	0.95896	1.23483	0.841631	0.993971	0.626612	1.39653	0.283	0.397987	0.655575	0.794354	0.765982	1.28142	0.711226
FGF23	0.441784	0.392502	0.621018	0.809047	1.18431	1.00664	0.47667	0.553529	0.63072	0.654979	0.591122	0.424529	0.268951	0.688004	0.542514	0.479269	0.526033
FGF3	0.574463	0.780339	0.310903	0.769931	1.11191	1.11816	0.865783	0.404965	0.90719	0.523232	0.732946	0.800697	0.738716	1.12093	0.80998	0.294642	0.964749
FGF4	0.604081	0.907434	0.69306	0.745289	1.2043	1.05042	0.933578	0.711216	1.12454	0.923162	1.0184	0.849798	0.704527	0.820512	0.89997	0.525147	0.906168
FGF5	0.862894	0.500651	0.845912	1.11529	0.823233	1.06148	0.488305	1.24217	0.612473	1.05919	0.371254	0.358902	0.161072	0.222623	0.272031	0.761004	0.297572
FGF6	0.425916	0.655143	0.597734	0.88799	1.09187	1.02014	0.735392	0.74643	0.792683	0.541135	0.542072	0.519893	0.589025	0.361103	0.569797	0.35296	0.650494
FGF7	0.274819	0.456301	0.732529	0.555194	0.902342	1.54246	0.471217	0.33234	0.737654	0.473965	0.840998	0.471774	0.261928	0.480176	0.284111	0.275152	0.57054
FGF8	1.3599	0.890047	0.937319	0.729716	1.09687	1.17341	0.888589	0.871736	0.978877	0.738407	0.845177	0.722041	0.63573	0.979583	0.586442	2.97133	0.685542
FGF9	0.540085	0.533231	0.709075	0.730798	1.00513	1.26407	0.592832	0.565934	0.613038	0.563312	0.703202	0.504944	0.36907	0.574597	0.451621	0.722108	0.510613
FGFR1	1.55851	0.80713	1.28545	1.09654	1.0251	0.878368	0.830978	1.53362	0.74006	1.43757	0.41215	0.55787	1.14179	1.37705	1.277	1.60674	1.26789
FGFR2	0.697202	0.759576	0.621573	1.00534	1.01982	0.974843	0.737222	0.751905	0.639349	0.778709	0.351104	0.530688	0.792264	0.655006	0.841681	1.24043	0.813449
FGFR3	1.02957	0.64762	0.768723	1.37564	0.69228	0.932081	0.687735	1.09197	0.772925	1.20803	0.478944	0.572688	2.05349	1.48031	1.84202	0.853886	1.18379
FGFR4	0.705418	0.931597	0.747159	0.928894	0.9652	1.10591	0.92936	0.534306	1.14766	0.913786	1.24506	0.978006	0.782151	0.876977	0.740738	0.773556	0.952578
FGR	0.545927	0.862099	0.718964	1.29643	1.02771	0.675863	0.931791	0.523192	1.14628	0.395978	0.943222	0.848585	0.725861	0.724227	0.983961	0.410696	0.54744
FIGF	0.681147	0.687595	0.608512	1.53755	0.721697	0.740757	0.661816	0.704042	0.843432	1.8428	0.879678	0.817618	0.85282	0.729977	0.62231	0.589877	0.700953
FKBP1A	1.85599	0.424345	1.58502	1.75898	0.611161	0.629862	0.369639	1.24203	0.518626	5.63289	0.528896	0.436888	1.8046	1.82021	0.892973	1.08804	0.551685
FKBP4	1.15577	0.622256	1.04247	1.12917	0.832024	1.0388	0.360077	1.09058	0.78119	1.6086	1.26234	0.76646	0.672648	0.766637	0.55562	0.765552	0.597564
FLNA	0.944698	1.31452	1.15747	0.726903	0.921604	1.35149	1.11624	0.928067	0.988143	1.15877	1.16738	1.01483	0.706185	0.422652	0.673601	0.966896	0.667315
FLNB	0.91105	0.548097	1.41094	1.3235	0.916734	0.759768	0.494073	0.96369	0.536103	1.16602	0.649181	0.429452	0.981485	0.950568	0.909185	0.860921	0.52146
FLNC	0.730468	0.854432	0.95631	0.752554	1.10536	1.14209	0.686514	0.818165	0.762132	0.859789	0.927472	0.696254	0.719133	0.537779	0.723688	0.767718	0.584244
FLT1	0.102629	0.345815	0.158269	0.270779	2.35724	0.371984	0.270432	0.125531	0.38144	0.118605	0.458661	0.2786	0.126259	0.15462	0.166531	0.0900991	0.12384
FLT3	1.01861	1.03832	1.29021	0.467019	0.99171	1.54127	0.68569	1.48189	0.871758	1.14857	0.698455	0.755629	0.494479	0.4888	0.667035	0.992021	0.484304
FLT3LG	0.897432	1.01847	1.0742	0.871691	0.922434	1.20588	0.852241	0.794041	0.890941	0.874262	1.02011	0.817311	0.72627	0.719288	0.790154	0.958703	0.690491
FLT4	1.38702	0.554697	1.54211	0.731834	0.886729	1.38144	0.779835	1.35875	0.658178	1.57509	0.407985	0.534621	0.68326	0.821732	0.65202	1.60879	0.731302
FN1	1.68405	0.896457	1.16857	0.87053	0.890912	1.23856	0.705747	1.28415	0.799848	0.977615	0.778716	0.751949	1.43973	1.59912	1.54926	1.22846	1.08103
FOS	0.579472	0.732493	0.648092	0.574759	1.16741	1.25783	0.411708	0.391866	0.498662	0.614552	0.659678	0.494035	0.484137	0.372016	0.39377	0.553438	0.454961
FOSB	1.31868	0.731636	1.12471	1.05623	0.828366	1.11541	0.499352	1.00254	0.389273	0.589419	0.396879	0.450791	1.37085	1.39979	1.34346	1.38185	0.954499
FOSL1	1.32207	0.893475	1.81619	0.666032	1.02156	1.31241	1.09948	1.53006	1.12952	1.12829	0.546152	1.04391	1.07536	1.07532	0.993568	1.80823	1.12243
FOSL2	0.752692	0.553864	0.645193	1.00591	1.01871	0.975374	0.550685	0.709305	0.449367	1.05317	0.362517	0.442197	1.20684	0.941318	1.28043	0.641325	0.875535
FOXH1	0.788514	1.48582	0.690793	0.727992	1.15622	1.11579	0.814739	0.56667	0.974698	0.727084	1.09416	0.805226	0.806167	0.605287	0.709764	0.806743	0.737572
FOXO1	0.898279	1.89806	0.977104	0.612474	1.20007	1.18745	1.07709	0.557142	1.18496	0.916914	1.4189	0.952454	0.863928	0.857596	0.867147	0.975374	0.862755
FOXO3	2.19788	1.47423	1.71523	0.834377	1.03933	1.1263	1.05864	1.53182	1.2633	2.09503	1.22169	1.10877	1.78965	1.30621	1.59616	1.77474	1.62206
FPGS	0.645525	1.49076	0.726517	0.733793	1.28189	0.984317	1.11972	0.694666	1.28934	0.753371	1.33209	1.12444	1.14625	1.32941	1.18265	0.545593	1.21365
FPR2	1.01588	1.16133	0.917391	0.63853	1.37068	0.990789	0.818804	0.895978	0.536702	0.820672	0.712483	0.460215	1.0641	1.39273	1.00083	1.1316	0.747819
FRAS1	0.547733	1.17572	0.701724	0.579016	1.20506	1.21592	0.800284	0.614824	0.737006	0.690634	0.98261	0.796624	0.595753	0.794316	0.557852	0.600082	0.677558
FRAT1	0.921721	0.722543	0.906282	0.690479	0.914062	1.39546	0.906451	1.08617	0.637124	1.3097	0.484943	0.677569	0.737159	0.852306	0.717425	1.18589	0.811145
FRAT2	0.621135	0.944299	0.716033	0.846135	0.942011	1.21185	0.729295	1.07526	0.71743	1.67191	0.831939	0.903908	0.797682	0.814888	0.874036	0.500999	1.07838
FREM1	1.8528	0.9537	1.5679	0.718131	0.756344	1.52552	0.771201	1.8618	0.67299	3.9131	0.54864	0.783003	1.24889	0.658233	0.967879	1.07874	0.810947
FREM2	1.09541	0.522186	0.876058	0.853063	0.825776	1.32116	0.703461	1.2388	0.514173	2.42332	0.479037	0.498698	1.08768	1.16909	1.27534	0.943755	1.0635
FRZB	0.424973	0.859424	0.400944	0.640388	1.16798	1.19163	0.809107	0.464367	0.638333	0.37727	0.704911	0.669364	1.24917	0.989256	1.08358	0.609649	0.625538
FYB	0.323334	0.920052	0.608799	0.441362	1.08773	1.47091	0.49538	0.359263	0.503197	0.416878	0.714321	0.735171	0.390129	0.439296	0.592373	0.16814	0.371388
FYN	1.07498	0.811371	0.989909	0.834788	1.04213	1.12308	0.799015	1.41612	0.674995	1.04688	0.650466	0.883053	0.880589	0.695029	1.11208	0.8708	0.738052
FZD1	2.09841	1.18311	2.77046	0.682986	1.06201	1.25501	1.49075	2.19785	1.02101	2.85317	0.715804	1.16851	1.09053	1.3654	1.31123	2.43271	1.45081
FZD10	1.15079	1.06376	1.66157	0.598558	1.25433	1.14712	0.997402	1.39582	0.977333	1.1974	1.33186	1.2635	0.368779	0.395397	0.536187	1.27168	0.258246
FZD2	1.21666	1.12345	1.3916	0.651788	1.30355	1.04466	1.10768	1.33375	1.15176	1.55225	0.707927	0.852237	0.742688	0.671977	0.789088	1.40319	0.922229
FZD3	0.696209	0.416165	0.928328	0.708805	1.03606	1.25514	0.531328	0.759292	0.377067	0.889596	0.141277	0.2663	0.379189	0.443748	0.423165	0.792786	0.472569
FZD4	1.42939	0.549194	0.736789	0.813436	0.595385	1.59118	0.693185	1.05566	0.532255	1.16218	0.0956929	0.313394	0.650721	0.680533	0.735897	1.17845	0.908199
FZD5	0.687328	0.596845	0.835869	0.919845	1.04316	1.037	0.807867	0.601706	0.723264	0.627435	1.18508	0.414109	0.516711	0.753696	0.511976	0.768403	0.971804
FZD6	0.712229	0.294064	0.59439	1.43956	1.17608	0.384364	1.24965	0.520835	0.354515	0.541578	0.911506	0.219687	0.358602	0.248447	0.268435	0.756313	0.629391
FZD7	0.462527	0.90167	0.55441	1.27225	1.08656	0.641197	0.959528	0.418958	1.0175	0.574875	1.02445	0.83737	0.73816	0.853301	0.688205	0.586076	1.01487
FZD8	1.80718	1.17877	1.23925	1.17958	0.987532	0.832883	1.31205	1.44531	1.25722	0.957595	0.842027	0.997501	1.82982	2.14112	1.98931	1.31988	2.15091
FZD9	0.441803	1.20845	0.668027	0.754744	1.24907	0.996186	1.31033	0.484629	1.16878	0.795356	1.11889	0.889741	0.754055	0.753237	0.795852	0.432426	0.763542
GAB1	2.03597	2.10613	2.98224	0.762715	1.21194	1.02534	2.12688	2.12444	2.487	3.0141	1.89733	1.63709	0.911485	1.02421	1.11467	2.33136	1.17356
GAB2	0.630284	0.944397	1.00061	0.943267	1.28491	0.771822	1.19468	1.13067	1.30757	0.978463	1.22305	0.797888	0.489165	0.749429	0.71086	0.678978	0.679003
GABRA1	0.568418	0.829348	0.984824	0.97481	1.22552	0.799675	1.0354	0.698473	1.12147	0.689857	1.16259	0.7901	0.501273	0.712282	0.53527	0.708108	0.716775
GABRA2	1.10397	0.811985	0.704707	0.966598	1.15643	0.876967	0.774118	0.89313	0.667418	1.0927	0.427276	0.458549	0.790832	0.969819	1.06838	1.46882	0.735635
GABRA3	2.06208	0.829086	1.35079	1.07424	1.13748	0.788279	0.900403	1.70283	0.788683	2.80353	0.421625	0.541966	1.15518	1.52206	1.38604	1.72753	1.31417
GABRA5	1.78491	1.6571	2.75011	0.931788	1.34582	0.722391	1.77557	2.04265	1.78566	2.66228	1.01253	1.49305	1.25458	1.01476	1.42456	2.17604	1.43716
GABRA6	0.98285	0.958619	0.715663	0.829241	1.2212	0.949558	0.939001	0.700508	1.11018	0.662292	0.909195	0.853273	0.718603	1.3039	0.958903	0.931527	0.948977
GABRB1	0.544549	0.514954	0.639562	0.656776	0.84115	1.50207	0.583417	0.290364	0.711663	0.478885	0.96853	0.554141	0.267898	0.375338	0.300831	0.64258	0.53029
GABRB2	0.892591	1.04521	0.584935	0.853723	1.06021	1.08607	1.07552	0.57002	0.901578	0.531787	0.724895	0.748201	0.810349	0.803323	0.67341	1.78924	0.765788
GABRB3	1.42287	0.915432	0.854108	0.863175	0.905422	1.2314	0.961594	0.67154	1.20595	0.928568	1.24147	0.928949	0.650966	0.981406	0.686208	1.53595	0.871479
GABRD	1.93622	0.797827	1.41553	0.936151	0.940014	1.12383	0.891862	1.61291	1.02937	1.50806	0.845515	0.816767	1.04783	1.48609	1.16666	1.68334	1.11197
GABRE	2.06625	1.25331	2.60049	0.858514	1.14552	0.995968	1.3164	1.9893	1.59992	2.29094	0.66773	0.9613	0.864374	1.1443	1.06541	2.16062	1.08984
GABRG1	0.502807	0.585626	0.757833	0.839093	1.02872	1.13219	0.570469	0.584626	0.671627	0.545947	0.867878	0.486705	0.418378	0.674535	0.526695	0.396572	0.515584
GABRG2	0.187767	0.363081	0.471227	0.804457	0.762018	1.43352	0.346757	0.269664	0.371369	0.267775	0.65965	0.371638	0.137443	0.297374	0.205032	0.141734	0.384486
GABRG3	0.629142	0.739179	0.805771	0.866634	0.953568	1.1798	0.801334	0.685043	0.781581	0.718677	0.800862	0.787755	0.86046	0.753524	0.753417	0.629267	0.844894
GABRQ	1.35437	0.531301	1.08366	1.34977	0.924003	0.726225	0.59113	1.37854	0.645677	1.65629	0.460134	0.536718	1.1688	1.01302	1.38081	1.00428	0.839343
GART	1.39112	0.478247	1.5515	1.03874	1.29671	0.664554	0.555706	1.41904	0.504604	0.886777	0.537218	0.523676	1.24188	1.60174	1.05301	0.84524	1.00983
GAS1	0.422012	0.647352	0.330655	1.03716	1.13363	0.829203	0.659206	0.445127	0.569807	0.536597	0.509594	0.477802	0.578738	0.743751	0.534938	0.90169	0.374003
GAS2	0.532642	0.851824	1.12381	0.87068	1.05574	1.07358	0.548343	0.636168	0.687419	0.831446	1.19903	1.08645	0.672872	0.683093	0.544225	0.526602	0.89069
GAS6	1.80472	0.665196	1.30511	1.28756	0.969853	0.742583	0.696499	1.73312	0.725442	1.76322	0.52801	0.786206	2.20804	1.49374	2.01079	1.23104	1.45411
GAS8	1.21936	0.525535	0.897375	1.05048	0.957025	0.992493	0.511477	1.25643	0.611977	1.04121	0.45993	0.613806	1.10548	0.975644	1.28455	0.951658	0.887522
GATA1	1.05722	0.598816	1.05814	1.21504	0.963836	0.821126	0.618477	1.10948	0.63562	0.8677	0.630176	0.616152	1.80807	1.73045	1.5679	1.07758	1.24613
GCFC2	0.605491	1.23509	0.885562	0.792146	1.38918	0.818678	1.40082	0.955173	1.62962	0.680056	0.62812	1.15825	0.386925	0.722444	0.422996	1.07613	0.265149
GCGR	0.968289	1.15134	1.11482	0.797635	0.865524	1.33684	0.889578	0.874037	1.22498	1.21826	1.27756	1.11638	0.709336	0.829105	0.693944	1.08793	0.840567
GDF1	0.999294	0.971179	0.71302	0.632921	1.11951	1.24756	0.858567	0.543104	1.00002	0.840555	1.05703	0.927518	0.815786	0.975884	0.796308	0.885088	0.824016
GDF10	0.978646	0.706611	0.63453	0.820537	1.00529	1.17417	0.730817	0.841813	0.629175	0.603175	0.606191	0.626051	1.66013	1.37182	1.18418	1.30346	0.942028
GDF15	0.267696	0.843574	0.35119	0.705894	0.84161	1.4525	0.40296	0.282244	0.727548	0.346164	1.05674	0.573394	0.457473	0.467756	0.40683	0.325021	0.525947
GDF2	0.357099	0.88008	0.451799	1.04336	1.07955	0.877089	0.783105	0.562541	0.842355	0.564605	0.997442	0.734263	1.09008	0.723773	0.980467	0.414977	0.791384
GDF5	0.800649	0.705516	0.401741	0.898675	0.879071	1.22225	0.571537	0.522189	0.605292	0.583353	0.61933	0.579676	1.35978	1.30942	1.03634	0.866635	1.00048
GDF6	0.704701	0.560278	0.566164	0.930947	1.14874	0.920317	0.562977	0.711123	0.588662	1.08704	0.550979	0.495145	1.02366	0.928841	0.978137	0.659453	0.700417
GDF9	0.717702	1.03555	0.756683	0.739807	1.0394	1.22079	0.767658	0.554269	0.988524	0.876338	1.02594	0.885033	0.827788	0.807104	0.737225	0.886912	0.861138
GDNF	1.05223	0.685467	0.988547	0.857386	1.15164	0.990978	0.531114	1.0531	0.555851	1.11354	0.572788	0.498863	1.1552	0.830685	1.1769	0.907552	0.653183
GFER	0.849557	1.23511	1.00453	0.741561	1.25428	1.00416	0.99416	0.977338	1.22398	0.964968	1.18262	1.02627	1.47137	1.32142	1.5031	0.662651	1.13565
GFRA1	0.637236	0.681501	0.381796	0.734136	1.45114	0.814723	0.696624	0.396253	0.557872	0.422394	0.584594	0.619641	1.48539	1.12788	0.995005	1.06723	1.21595
GFRA2	1.05337	1.15233	1.24302	0.283208	1.48786	1.22893	1.23586	1.07683	1.11753	1.04258	1.10563	1.17041	0.919284	1.1476	0.871462	1.59182	0.799101
GFRA3	1.5211	0.889768	1.6689	0.931225	1.16239	0.90638	0.893511	1.51439	0.892959	1.37906	0.950497	0.875172	2.45203	2.20478	2.12389	1.36192	1.48694
GFRA4	0.843219	1.19598	0.706735	0.516735	1.35085	1.13241	1.24479	0.643781	1.28213	0.840364	1.30956	1.24666	1.12335	1.17645	1.03238	0.838353	1.08444
GH1	1.57702	1.16181	0.99671	0.555357	1.12151	1.32314	1.14353	0.935094	1.25954	1.13952	1.18992	1.44387	1.50689	1.59406	1.47497	1.01828	1.52819
GH2	0.675418	1.17647	0.782936	0.66422	1.14852	1.18726	1.10993	0.688859	1.09966	0.673885	1.23668	1.36888	1.09126	1.04236	1.20681	0.683689	0.946786
GHR	0.748108	0.665394	0.702347	0.592519	1.21607	1.19141	0.723544	0.513271	0.640558	0.738172	1.18616	1.22472	0.323855	0.646294	0.387634	0.907587	0.541982
GHRH	1.33349	0.347577	1.14077	1.13213	1.06951	0.798359	0.440277	0.902521	0.355265	2.51457	0.419534	0.443099	1.20334	1.16294	0.992485	0.737967	0.620743
GLI1	1.72178	0.728294	1.53905	0.600658	0.973073	1.42627	0.923029	1.53558	0.748131	1.23617	0.801245	1.02182	1.50511	1.29834	1.32616	1.40938	1.13212
GMFG	1.71112	0.989796	2.61732	0.472614	1.09399	1.4334	0.982944	2.11521	0.995839	2.3728	1.1788	1.49746	1.21396	0.891585	1.53704	1.40272	0.824111
GNA11	1.09502	0.747202	0.683813	0.725666	0.886583	1.38775	0.839122	0.818325	0.616717	0.835306	0.336142	0.403288	0.897586	0.884983	0.84613	1.44238	0.922518
GNA12	1.79523	0.406981	1.3108	0.854819	1.32422	0.82096	0.552969	1.78211	0.360262	2.63478	0.0547591	0.152135	1.1026	0.625934	1.50846	1.31622	0.852694
GNA13	0.413501	0.242183	0.383666	0.736188	0.704502	1.55931	0.332665	0.337962	0.437036	0.472154	0.471019	0.0825268	0.318156	0.239733	0.434933	0.329522	0.311082
GNA14	0.809887	1.36826	0.94752	1.22749	1.032	0.740505	1.21159	0.849826	1.05962	0.880713	1.0888	0.857447	0.993622	1.26328	1.05724	0.859606	1.12605
GNA15	1.1403	0.99649	1.25943	1.10007	0.915592	0.984336	1.10147	1.02368	1.15031	1.10106	1.06442	0.910172	0.925381	0.886175	0.820349	0.976429	1.22459
GNAI1	0.542586	0.882692	0.72514	1.11089	1.1926	0.69651	1.12422	0.600151	0.894877	0.643157	0.958503	0.559847	0.641222	0.821706	0.705993	0.52087	0.77601
GNAI2	0.556848	0.953074	1.02907	0.796929	1.37219	0.830883	1.11458	0.673949	1.33039	1.05249	1.03202	0.855785	0.993455	0.718695	0.877675	0.531834	1.09941
GNAI3	0.542922	0.820208	1.31309	1.01209	1.41928	0.568627	1.11557	0.747275	0.806484	0.996088	0.755002	0.777708	0.596595	0.378763	0.548747	0.533638	0.842597
GNAL	1.26144	1.19109	0.78526	0.95559	1.13763	0.906784	1.34616	1.00473	1.35998	1.25284	1.20812	1.22663	1.33032	1.39079	1.38705	0.923182	1.43566
GNAO1	1.03509	0.999792	1.2555	0.915268	1.18385	0.900881	1.15394	1.35684	1.12274	1.21612	0.909065	0.843687	1.37709	1.59459	1.16096	0.925552	1.49768
GNAQ	1.00407	0.405846	1.45702	1.21922	1.21433	0.566454	0.631332	1.13023	0.736888	1.2227	0.663852	0.303566	0.382991	0.804145	0.498972	1.10095	0.5433
GNAS	1.73291	1.09869	0.999268	1.12159	1.00525	0.873161	1.06512	1.44297	1.15794	1.55712	0.792083	0.784213	1.21128	1.74121	1.26049	1.82069	1.33735
GNAT1	1.64973	1.32473	0.862279	1.11335	1.10855	0.778106	1.42208	1.17345	1.04654	1.5971	0.487918	0.964312	1.47782	1.60202	1.4435	1.37735	1.48934
GNAT2	0.711617	0.883917	0.815684	0.787862	1.17303	1.03911	0.905	0.65625	1.05912	1.00492	0.688544	0.821087	0.639542	0.883431	0.720854	0.908255	0.838391
GNAZ	0.620608	0.734571	0.874266	0.756782	1.1823	1.06092	0.808961	0.731234	1.03009	0.704132	1.04878	0.663307	0.401161	0.6844	0.622146	0.591035	0.607136
GNB1	0.853122	0.679232	0.617135	0.863314	1.04051	1.09618	0.697679	0.688489	0.689666	1.14421	0.607219	0.541308	0.589464	0.782286	0.707259	1.13458	0.801002
GNB2	0.838545	0.606087	1.23822	0.702855	0.886666	1.41048	0.624582	0.902996	0.952988	1.5144	0.838239	0.735967	0.328113	0.508255	0.378558	1.06132	0.716322
GNB2L1	2.61061	0.431701	2.64227	0.954846	1.05453	0.990628	0.47647	4.02524	0.543985	3.04573	0.419911	0.407133	0.480527	0.911414	0.603574	2.54146	1.17694
GNB3	1.38888	0.754109	1.03412	0.783813	0.864296	1.35189	0.86698	1.02787	0.986445	1.43679	0.68197	0.803249	0.845512	1.05634	0.873151	1.10672	1.06988
GNB4	1.75598	0.294579	1.34959	1.36425	1.12787	0.50788	0.376597	1.4255	0.259275	1.50973	0.171358	0.215653	1.52717	1.18281	1.2804	0.922001	1.03518
GNB5	1.12681	0.588056	0.873766	1.11957	0.873864	1.00657	0.596817	1.21824	0.550502	0.678988	0.349627	0.535176	1.44971	1.12205	1.38681	0.852638	1.17839
GNG10	0.534726	0.857077	0.80993	0.741541	0.907367	1.35109	0.777558	0.678101	1.07088	0.705245	1.1317	0.982289	0.534394	0.574752	0.674755	0.563516	0.753483
GNG11	0.67207	0.719966	0.927625	0.783249	0.841861	1.37489	0.72916	0.736526	0.834236	0.747659	0.88405	0.982391	0.558883	0.899921	0.545381	0.664738	0.900508
GNG12	1.0555	0.0097361	1.14622	0.938969	0.769999	1.29103	0.00875684	1.15683	0.0468821	1.10099	0.0542077	0.366799	0.476476	0.625389	0.502511	0.888076	0.417183
GNG13	2.17155	0.61585	1.74528	0.941466	1.01309	1.04544	0.756845	1.88861	0.800765	2.63625	0.345354	0.513001	0.798451	1.11303	0.878101	1.72408	0.997131
GNG2	0.846529	0.641808	0.817796	0.86088	1.0817	1.05742	0.691585	0.684749	0.810345	0.950133	1.02031	0.8903	0.564861	0.706441	0.590152	0.801764	0.555878
GNG3	1.02504	1.0687	1.37541	0.925831	0.88029	1.19388	1.07462	0.932783	1.29378	1.23261	1.32392	1.62135	0.735509	0.667616	0.687828	1.03169	0.874465
GNG4	0.889768	0.983397	0.958363	0.860991	0.988662	1.15035	0.980806	0.557533	1.33385	0.814227	1.62279	1.46145	0.75972	0.96888	0.748406	1.01565	0.994084
GNG5	0.647646	0.814138	0.964347	1.04952	1.02189	0.928594	0.957159	0.604079	1.11972	0.654591	1.446	1.17053	0.961253	0.817998	0.688802	0.611716	0.827196
GNG7	0.483707	0.387038	0.553062	0.690934	1.02981	1.27926	0.573664	0.324826	0.914885	0.400553	1.13073	1.02905	0.49771	0.632735	0.321606	0.804123	0.536611
GNG8	0.754402	0.548672	0.733241	0.838341	1.03405	1.12761	0.679284	0.634	0.75778	0.735083	1.0899	0.828807	0.519874	0.655642	0.370388	0.770258	0.656096
GNGT1	1.11852	0.845567	0.990225	0.909883	0.718238	1.37188	0.866428	0.700317	1.14344	1.03031	1.26204	1.17294	0.821034	0.839902	0.65978	0.902538	0.917465
GNGT2	1.81559	0.437758	1.57691	1.06789	0.866519	1.0656	0.522196	1.50831	0.615965	1.64677	0.538673	0.594201	0.870796	1.13347	0.919346	1.42838	0.784062
GNRH1	2.34392	1.03234	2.96077	0.802815	1.14385	1.05333	1.20403	2.31814	1.33328	3.29354	0.631823	0.974471	0.948695	1.21491	1.07822	2.37935	1.18274
GNRH2	0.947412	0.625647	0.591897	0.886559	1.24509	0.868355	0.809606	0.658786	0.578439	0.669697	0.363684	0.576979	1.33201	1.06222	1.22814	1.12769	1.2403
GPC6	1.34195	0.339437	0.959342	1.09153	0.777758	1.13071	0.34101	1.16209	0.479374	0.689785	0.736046	0.319083	1.35177	1.27242	1.29467	1.0513	0.915882
GPLD1	0.956955	0.554278	1.42231	0.912632	0.834411	1.25296	0.460763	1.12987	0.65804	0.934592	0.965416	0.559843	0.627489	0.625562	0.372022	1.16916	0.606244
GRAP2	0.708542	0.932534	0.730964	0.743263	1.18182	1.07491	0.78154	0.822634	1.09395	0.787944	1.21626	0.892748	0.729686	0.975948	0.794869	0.644063	0.743772
GRB10	0.824016	0.934224	0.716848	0.850005	0.920377	1.22962	0.877392	0.715762	1.09997	0.832683	1.14227	0.89884	1.02316	1.35185	0.997053	0.652524	1.04197
GRB14	1.92155	0.959911	1.87839	0.807236	0.823216	1.36955	1.37233	1.66942	1.13888	1.2734	0.503393	0.837283	1.15855	1.58481	1.28634	1.99462	1.36951
GRB2	0.387661	0.788799	0.497822	0.853354	1.18002	0.966624	0.799933	0.40213	0.873632	0.379081	0.906726	0.807294	1.51566	1.48578	1.14881	0.402944	1.01773
GRB7	0.623891	0.570472	0.622219	0.730425	0.978111	1.29146	0.832965	0.88519	0.370546	0.710116	0.261679	0.415395	0.977445	0.761593	0.797434	1.27744	0.808929
GRIA1	1.21326	1.17388	1.55929	0.645819	1.13193	1.22225	1.13374	1.46104	1.26552	1.27257	1.38917	1.37348	1.17149	1.10959	1.22559	1.02707	1.13923
GRIA2	0.43341	0.939361	0.679824	0.413475	1.365	1.22153	0.821145	0.480404	1.03038	0.57569	1.15549	1.20771	0.592611	0.765109	0.54271	0.452008	0.796325
GRIA3	1.45548	1.61689	2.2799	0.781231	1.29377	0.925004	1.80556	1.6696	1.58397	2.57893	1.29582	1.65086	1.18779	1.1209	1.21691	1.75822	1.36698
GRIA4	1.15649	1.09392	0.924063	0.568281	1.31394	1.11778	1.21632	1.07338	1.01351	1.15494	1.0619	1.2877	1.25	1.46207	1.15138	1.37332	1.17447
GRID2	0.725771	0.632189	1.39315	0.695834	1.11043	1.19373	0.838207	0.951578	0.87429	1.11526	1.21872	1.15791	0.534197	0.80802	0.382818	0.958692	0.563401
GRIK1	1.18046	1.58828	1.99958	0.80746	1.24627	0.94627	1.75278	1.5117	1.46838	2.10344	1.21294	1.7192	1.29131	1.17543	1.34463	1.75367	1.49199
GRIK2	1.27041	1.53375	1.8036	0.786624	1.21472	0.998657	1.6586	1.42955	1.32153	1.9664	1.22516	1.60424	1.10639	1.12303	1.20614	1.57797	1.20886
GRIK3	0.451997	0.868748	0.465687	0.597867	1.08581	1.31632	1.06877	0.396684	1.14989	0.659611	1.28197	1.40928	0.829891	0.984234	0.680853	0.472112	0.728054
GRIN2A	0.64485	0.5146	0.811901	0.134766	1.02303	1.8422	0.956658	0.582747	0.80765	0.917879	1.07722	1.65708	0.125928	0.52458	0.193271	0.629406	0.42957
GRIN2B	0.418498	0.527777	0.440791	0.336951	0.728793	1.93426	0.797764	0.423006	0.707295	0.640732	0.839727	1.19186	0.280735	0.446624	0.326547	0.406359	0.453554
GRIN2C	0.961118	0.232962	0.598512	0.7754	0.808831	1.41577	0.36541	0.844339	0.277431	1.74929	0.29792	0.446902	0.779539	0.645435	0.952356	0.593995	0.537312
GRK1	1.41387	0.394759	0.862195	0.363962	0.680969	1.95507	0.700169	1.07153	0.531619	0.911671	0.538783	1.07797	1.39743	1.2164	1.63294	0.909774	0.933608
GRK4	1.41545	0.710515	1.29463	0.60495	0.891606	1.50344	1.02864	1.16361	0.859013	1.30146	1.00677	1.4144	2.09408	1.77626	2.69237	1.10244	1.54776
GRK5	1.33836	0.288865	1.28794	1.17446	0.951033	0.874503	0.617869	1.0517	0.243215	1.37391	0.0627731	0.0689461	0.745694	0.55151	0.454859	1.08809	0.616826
GRK6	2.40043	1.07595	1.21722	1.22938	0.674587	1.09603	1.25762	1.94332	0.912651	2.09246	0.599877	0.652086	2.34323	2.20708	1.95972	1.53031	2.78457
GRK7	0.670124	0.581634	1.0773	0.852832	0.631427	1.51574	0.746677	0.731208	0.541599	0.770837	0.346202	0.361823	0.535916	0.419012	0.430844	0.865912	0.730381
GRM1	1.12974	0.861568	1.13707	0.876334	0.871882	1.25178	0.947176	0.882437	0.953502	1.40927	0.582207	0.548576	0.959957	0.620179	0.721461	1.5985	0.991102
GRM2	4.45595	0.706297	2.37894	1.5248	0.722263	0.752938	0.929006	2.7781	0.222526	1.71663	0.0376246	0.266533	2.14262	2.50227	2.22082	3.43488	1.87276
GRM3	1.76723	1.08181	1.39938	0.996554	1.08424	0.919206	1.28911	1.544	0.694294	1.33698	0.230164	0.772516	1.63821	1.20627	1.6581	1.8634	1.94865
GRM4	2.62446	0.920734	2.12762	1.34809	1.0205	0.631415	1.22603	2.4983	0.839264	1.90653	0.290759	0.675087	2.96838	2.07452	3.45629	1.94462	2.1635
GRM5	2.08495	1.0495	2.60434	0.718708	1.37735	0.903945	1.37724	1.90506	1.40184	2.15981	1.24844	1.01723	0.760575	0.6436	0.776808	1.94711	0.966243
GRM6	2.51116	0.892446	2.03286	1.20585	1.38728	0.406872	0.882296	1.63506	0.599718	1.34156	0.433787	0.557075	1.98306	1.92616	1.9509	1.57303	2.56155
GRM7	1.82294	1.524	2.75397	0.99	1.02646	0.983542	1.54354	2.31471	1.80496	1.65661	0.715467	1.01854	1.21813	1.37729	1.39601	2.75653	1.49088
GRM8	0.483965	0.638495	0.879135	0.97876	1.40964	0.611601	0.909203	0.602598	0.914624	0.594275	0.905788	0.366376	0.353874	0.486033	0.535997	0.442262	0.475234
GSK3A	0.659492	0.645677	0.835005	1.51052	1.06342	0.426057	0.686642	1.25028	0.811808	0.698497	0.461095	0.355737	0.335552	0.601432	0.565118	0.678926	0.404918
GSK3B	1.17186	1.19472	1.08739	1.08663	1.25725	0.656112	1.10284	1.22746	0.767736	0.916294	0.381304	0.671766	1.2775	1.08556	1.23611	1.60087	1.40116
GSN	1.41489	1.16483	1.19431	1.09163	1.10395	0.804425	1.45979	1.45325	1.58687	0.729354	0.543857	0.843163	1.20988	1.67928	1.35816	2.06943	1.35516
GTF2A1	1.06926	0.579214	0.880855	1.26199	1.14523	0.592783	0.657027	1.17597	0.629297	2.02908	0.350654	0.397469	1.17914	0.978835	1.65325	0.812841	0.974384
GTF2A2	0.932428	0.61718	0.772038	1.26837	1.00797	0.723658	0.70129	1.10579	0.759895	1.09742	0.445515	0.490246	1.27824	1.12803	1.39023	0.781004	1.03722
GTF2B	0.643257	0.658487	0.731909	0.98005	0.883267	1.13668	0.721151	0.572094	0.946735	0.663385	0.933597	0.735092	0.772086	1.09082	0.837468	0.441896	1.05275
GTF2E1	0.38614	0.203887	0.715851	1.01367	0.913351	1.07298	0.397483	0.553061	0.431578	0.399947	0.22174	0.229027	0.983294	0.880763	1.49775	0.279212	0.827801
GTF2E2	0.756307	0.899566	0.889092	0.95152	0.658317	1.39016	0.887016	1.07369	1.0927	1.0183	0.871753	0.916128	0.920407	1.13426	1.06814	0.791155	1.23271
GTF2F1	0.678845	0.335288	0.821634	0.610889	0.839365	1.54975	0.460174	0.598752	0.532341	0.801853	0.686338	0.536481	0.517649	0.700989	0.479823	0.590553	0.640838
GTF2F2	0.791196	0.770849	1.24709	0.623712	0.818001	1.55829	0.648887	0.895123	0.748094	1.48565	1.23951	0.757716	0.287308	0.532972	0.400555	0.921053	0.569637
GTF2H1	0.495287	0.560974	0.738058	0.885429	0.981318	1.13325	0.642379	0.564054	0.782045	0.699374	1.02671	0.820322	0.452257	0.682736	0.54072	0.673584	0.563482
GTF2H2	0.848063	0.957372	1.00606	1.10985	1.0064	0.883743	1.04033	1.01053	0.927905	0.793269	0.508121	1.00315	1.20263	1.01481	1.05018	1.80249	1.13955
GTF2H3	0.921785	0.661012	1.38814	0.883807	1.06886	1.04733	0.721263	0.891448	0.878254	1.25751	1.31539	1.22421	0.633177	0.865877	0.590121	1.21864	0.723434
GTF2H4	1.13841	0.449601	1.45163	0.669897	1.11097	1.21913	0.698919	1.13633	0.660639	1.4914	0.601545	1.12188	0.592405	0.741652	0.690592	1.44924	0.922819
GTF2H5	0.637849	0.331874	1.21182	0.629189	0.952437	1.41837	0.327584	0.721811	0.55155	0.908555	1.00384	0.862977	0.19129	0.216235	0.210191	0.736644	0.291642
GYS1	0.652595	0.480703	0.63888	1.29423	1.09072	0.615052	0.62615	0.663974	0.625626	0.495675	0.851408	0.791669	1.00269	1.14979	0.848839	0.940138	0.757523
GYS2	0.8888	0.631133	1.68354	1.29101	0.9982	0.710793	0.695338	2.15186	0.797665	2.02323	1.02383	0.934966	0.547976	0.621581	0.703614	1.17253	0.733876
GZMB	0.987854	0.586049	0.744344	1.04213	1.27195	0.685921	0.676526	1.14905	0.532165	0.449805	0.45698	0.557593	1.256	1.0024	1.2903	2.54531	1.06615
H3F3A	0.765771	0.661811	0.69699	0.919809	1.07375	1.00644	0.709019	0.600957	0.83103	0.940565	0.904188	0.771208	0.715753	0.851476	0.61744	0.743762	0.703499
H3F3B	0.728197	0.569048	0.761987	0.99703	0.945438	1.05753	0.576791	0.664584	0.757738	0.732913	1.07192	0.897198	0.480041	0.574942	0.523471	0.735687	0.64866
HACE1	0.650443	0.531524	0.660212	1.32216	1.15512	0.522727	0.64787	0.734338	0.551889	0.687841	0.483717	0.561626	1.59624	1.06569	1.66825	0.570068	0.618161
HAPLN1	0.543771	0.596985	0.675949	0.883624	1.14262	0.973755	0.639339	0.622906	0.617279	0.539845	0.764505	0.674222	0.562805	0.582961	0.453101	0.61049	0.417431
HAPLN2	0.885355	0.820742	0.923811	0.830274	0.825068	1.34466	0.800509	0.706075	1.01138	0.625247	1.10554	0.87772	0.507945	0.629658	0.523785	0.87173	0.693281
HAPLN3	1.31644	0.608693	0.740568	0.85929	0.88713	1.25358	0.530607	0.811245	0.679117	0.779697	0.758295	0.664064	0.98053	1.13158	0.971581	0.934001	0.954083
HAPLN4	1.10102	0.495333	1.08341	0.586264	0.626844	1.78689	0.164773	0.863881	0.624174	1.10374	1.01326	0.404532	0.369279	0.339752	0.316593	1.33436	0.421645
HAT1	0.910534	0.749029	1.07424	0.818819	0.935038	1.24614	0.626145	0.999893	0.790949	0.906583	1.09437	0.611307	0.690534	0.536583	0.561587	0.925236	0.565666
HBEGF	0.543907	0.740135	0.556156	0.743503	1.0719	1.1846	0.68051	0.647582	0.838069	0.635106	0.88028	0.725364	0.651681	0.625159	0.569213	0.613983	0.609243
HCK	1.34406	1.23221	2.15337	0.659371	1.16758	1.17305	1.44679	1.65608	1.44698	2.49701	0.926926	1.46786	1.00841	0.928174	1.07681	1.48119	1.1962
HDAC1	1.0155	0.718651	0.873569	0.657199	1.26895	1.07385	0.810516	0.853469	0.620271	0.756683	0.601592	0.59484	1.23137	1.22052	0.969027	0.870219	0.999513
HDAC10	0.979445	0.712358	0.805949	0.656353	1.16441	1.17923	0.620684	0.935628	0.777281	0.980696	0.708894	0.729273	0.889453	1.0099	1.26228	0.754342	0.929271
HDAC11	0.574603	0.986663	0.703796	0.55142	1.24322	1.20536	0.754948	0.553006	1.13764	0.656915	1.20466	0.991354	0.790459	0.949147	0.792909	0.578325	0.823782
HDAC2	1.38593	0.533647	1.7772	0.70926	1.24324	1.0475	0.723125	1.65134	0.334557	2.05322	0.219455	0.420337	1.05283	0.828375	0.931589	2.27358	0.982761
HDAC3	0.731656	0.992502	0.857548	0.645515	1.23985	1.11464	0.940212	0.841751	1.16648	0.816188	1.26693	1.23688	1.19927	1.32838	1.19992	0.637654	1.04312
HDAC4	0.403557	0.787719	0.653476	0.724396	1.24414	1.03146	0.636567	0.441339	0.988883	0.430256	1.3682	1.16296	0.385336	0.645723	0.388575	0.292067	0.521057
HDAC5	0.887397	0.811099	0.774747	0.830039	1.21027	0.95969	0.881015	1.18459	0.84994	0.840943	0.837171	0.974067	1.25045	0.890716	1.26278	0.745443	0.722223
HDAC6	0.744353	0.999085	0.688348	0.702877	1.19209	1.10503	1.11979	0.8137	1.11511	0.587423	1.09885	1.5631	1.53171	1.52612	1.49691	0.517351	1.25276
HDAC7	0.700646	1.08687	0.777832	0.475865	1.15994	1.3642	1.23765	0.741743	1.30949	0.703523	1.25843	1.76852	1.4078	1.38223	1.27484	0.62879	1.27397
HDAC8	0.188989	0.994932	0.387012	0.325814	1.20871	1.46548	0.984648	0.24351	1.04131	0.362988	1.16231	1.48806	0.516774	0.711452	0.609053	0.207511	0.604849
HDAC9	1.12896	0.719842	1.13882	0.862618	1.03537	1.10201	0.762629	1.27988	0.7472	1.33317	0.685377	0.845055	1.60415	1.50408	1.92684	0.994067	1.41039
HDGF	0.948319	0.5076	0.839762	0.45026	1.03627	1.51347	0.612067	1.013	0.582914	0.699317	0.689254	1.01046	1.42135	1.24198	1.2708	0.7531	0.784589
HECW1	0.394977	1.25081	0.562985	0.550957	1.17976	1.26928	1.50186	0.463146	1.17958	0.378835	1.1524	1.6467	1.22421	0.827587	0.746593	0.813014	0.783672
HECW2	0.435555	0.59548	0.646542	0.536099	0.89892	1.56498	0.787357	0.381801	0.872264	0.499476	1.00618	1.39632	0.471544	0.550035	0.502298	0.628647	0.25052
HELLS	0.310161	0.552122	0.352576	0.254944	0.915392	1.82966	0.749048	0.274622	0.877612	0.573064	1.1341	1.58835	0.610901	0.722456	0.776704	0.329051	0.665016
HGF	2.12901	0.684711	1.36291	0.757282	0.771279	1.47144	0.947697	1.5972	0.688447	1.97741	0.464094	0.80453	1.6673	2.09584	1.90982	1.70631	1.88762
HIF1A	1.86471	1.19117	2.16432	0.704199	0.954655	1.34115	1.37773	1.62222	0.897812	2.51878	0.51612	1.06483	1.06965	1.32677	1.29213	1.98828	1.36916
HIF1AN	0.667093	0.553726	1.3283	1.32605	1.25198	0.421964	0.813396	0.940452	0.441893	0.964694	0.262773	0.142553	0.748342	0.902334	0.88486	0.744626	0.476329
HIST1H3A	1.04011	0.40548	1.27703	1.0628	0.456821	1.48038	0.614942	1.17078	0.454883	1.33646	0.170309	0.265478	1.03955	0.73468	1.06477	1.02496	0.944645
HIST1H3B	1.99572	1.22782	1.45084	0.951516	0.96828	1.0802	1.33687	1.62077	1.1624	1.79295	0.96505	0.922581	1.53354	1.57747	1.9446	2.82397	1.65831
HIST1H3C	2.88042	0.662985	1.09339	1.37326	1.08457	0.542168	0.783494	2.32392	0.501801	4.37764	0.82451	0.323894	1.44844	1.66863	1.48359	2.51144	1.19373
HIST1H3D	5.51982	0.369561	3.28446	1.92716	1.02879	0.0440492	1.07406	6.32768	0.325223	4.95076	0.0358612	0.179209	2.81324	0.965355	3.70262	2.3961	1.49427
HIST1H3E	3.02039	0.977183	2.19609	1.38379	1.18201	0.434198	1.2925	4.75206	0.85907	2.32729	0.465814	0.136136	1.13249	0.191379	1.45121	2.28522	0.986184
HIST1H3F	3.859	1.51006	3.00862	0.908416	0.965106	1.12648	2.10547	5.26884	1.78014	3.17413	1.26379	0.763919	2.80128	1.1419	3.03976	3.12021	1.86507
HIST1H3G	3.1738	1.34548	4.40861	1.23934	1.09451	0.666141	1.80737	4.1929	1.56547	3.94476	0.734077	0.740659	1.58323	1.44138	1.79265	2.81095	1.41007
HIST1H3H	0.766298	1.17514	0.954467	1.02769	1.26975	0.702559	1.31222	0.745805	1.48186	0.852402	1.17528	1.19578	0.974993	1.27881	1.21591	0.915676	1.29681
HIST1H3I	1.9783	1.09961	1.0285	1.0244	1.23411	0.741489	1.29123	3.44654	1.34702	0.8774	0.823265	0.886609	0.992532	1.37002	1.5481	0.948076	1.0725
HIST1H3J	0.553357	0.322991	0.719158	0.981168	1.3202	0.698632	0.548652	0.590595	0.463394	0.386549	0.297718	0.030983	0.324049	0.40389	0.449898	0.460764	0.240184
HIST3H3	1.49973	1.51887	1.2521	1.18132	1.03744	0.781247	1.55338	1.4792	1.11833	1.04552	0.471171	0.818937	1.38994	1.33289	1.47745	2.28759	1.58763
HLA-DMA	1.4833	1.37179	1.97796	0.832805	1.18728	0.979917	1.37992	1.66765	1.4996	2.17027	0.75473	1.16719	1.04616	0.890898	1.15896	1.70563	1.22012
HLA-DMB	1.00101	0.73361	1.21506	0.857469	1.20867	0.933865	0.78617	0.89658	0.99153	1.14693	0.612219	0.645633	0.694009	0.853741	0.942174	1.1752	0.722985
HLA-DOA	1.17325	0.715487	0.919083	1.02613	1.06593	0.907947	0.757811	0.991677	0.859028	0.897337	0.49954	0.66616	1.1649	1.30038	1.86935	0.890577	1.29991
HLA-DOB	0.849499	0.827751	0.85021	0.816078	0.924311	1.25961	0.729851	0.850551	0.945337	0.928477	0.767932	0.7014	0.686046	0.676322	0.71164	0.731336	0.797321
HLA-DPA1	0.440133	0.669888	0.824197	1.03333	0.838418	1.12825	0.654476	0.4708	0.910883	0.784613	1.03816	0.743691	0.479785	0.761879	0.94589	0.531877	0.686334
HLA-DQA1	0.53529	0.469393	0.629832	0.875309	1.01339	1.1113	0.516925	0.500073	0.511973	0.617874	0.465077	0.395806	0.697533	0.612523	0.676329	0.701443	0.546377
HLA-DQA2	0.739858	0.87035	0.726111	0.778624	1.10439	1.11698	0.902157	0.628679	0.864393	0.660269	0.763049	0.748259	0.585019	0.681503	0.750526	1.59856	0.659633
HLA-DQB1	0.714523	0.769739	0.99174	0.987213	0.843762	1.16903	0.85742	1.00319	0.994401	1.01134	1.09688	0.890585	0.846861	0.854467	0.730057	0.860121	0.791004
HLA-DRA	1.29584	0.565772	1.23742	1.38367	0.873216	0.743111	0.657731	1.47816	0.65374	1.79085	0.324404	0.532374	1.50465	0.914313	1.43857	0.955709	0.674538
HLA-DRB1	0.351194	0.667718	0.472183	0.806957	0.961575	1.23147	0.748896	0.346935	0.973312	0.579937	1.11071	0.91867	0.517816	0.866731	0.621893	0.702023	0.68349
HLA-DRB3	0.402993	0.688037	0.614927	0.774493	0.894349	1.33116	0.697099	0.36795	0.921097	0.681736	1.06634	1.1465	0.567556	0.768412	0.651547	0.635998	0.739166
HLA-DRB4	1.01533	0.9222	1.00554	0.836745	0.863059	1.3002	0.994987	1.15728	1.07183	1.20479	1.06549	1.55285	0.922387	1.0019	1.10445	0.987855	1.06917
HLA-DRB5	0.340981	0.710888	1.02396	1.12185	1.03528	0.84287	0.673206	0.456968	0.954791	0.644131	1.75204	1.55781	0.582458	0.552813	0.674494	0.299029	0.674751
HLTF	0.384003	0.680521	0.715272	1.33087	1.0787	0.590439	0.770878	0.877557	0.933529	0.523534	1.33542	0.892586	0.428682	0.585606	0.442705	0.379205	0.371916
HMGA1	0.740116	1.28824	2.47343	0.90077	0.888876	1.21035	1.15683	1.5022	1.44172	1.12144	1.87157	1.91763	0.887168	1.08694	0.88091	0.652957	1.07226
HMGN1	0.754076	1.0466	1.20194	0.973981	0.997182	1.02884	1.16941	0.883298	1.3736	1.24179	1.66716	1.46693	0.8815	0.708533	0.698469	0.774861	0.835541
HNF1A	0.865595	0.534517	0.721457	1.26988	1.05515	0.674975	0.573282	0.895923	0.621428	1.11574	0.535337	0.567203	1.05004	0.87136	1.24275	0.744077	0.690269
HNF1B	0.910321	0.638702	0.672243	1.10953	1.0038	0.88667	0.603551	0.743393	0.746829	0.686974	0.818683	0.835577	1.1328	1.16309	1.37351	0.708455	0.95005
HNF4A	0.264641	0.724919	0.320187	0.821545	1.23108	0.947372	0.604335	0.20304	0.757904	0.453297	0.860156	0.88851	0.666325	0.835877	0.897048	0.285242	0.654135
HRAS	1.11934	1.17378	1.87044	0.88281	1.21183	0.905364	1.24064	1.60144	1.40197	1.4146	0.75096	1.16387	1.18719	1.01443	1.20829	1.71427	1.23343
HRH4	1.65062	0.499209	2.13735	1.0842	1.18115	0.73465	0.534601	1.86516	0.482707	1.06255	0.573431	0.514471	1.80022	2.18814	1.57272	1.33335	2.14826
HSP90AA1	2.40763	0.139075	1.49368	1.4249	0.972369	0.60273	0.179842	2.04702	0.211399	4.41931	0.230283	0.179162	2.41086	2.18813	1.68381	1.35775	1.49995
HSPA1A	1.01401	0.00971017	1.3722	0.683693	0.715012	1.60129	0.00873352	1.05864	0.0220028	0.816199	0.655746	0.00957869	0.00414138	0.00600077	0.0315815	1.25835	0.0471234
HSPA1B	1.10505	0.227268	1.13493	0.8735	0.970265	1.15623	0.121699	1.49175	0.229473	0.939394	0.364508	0.221574	1.23939	0.808059	1.24988	1.32271	0.823502
HSPB1	1.17427	0.817899	0.879384	0.754071	1.08326	1.16267	0.639763	1.09689	1.04388	1.00438	1.10058	0.738469	0.854734	1.04614	0.864651	1.07108	0.865498
HSPD1	0.919742	0.445343	0.913157	1.09627	1.06085	0.842884	0.384135	1.25578	0.511938	1.43488	0.524892	0.423411	0.945044	0.784506	0.779584	0.817525	0.697042
HSPG2	1.05494	0.595537	1.09075	0.866429	1.1799	0.953667	0.705839	0.915195	0.527897	0.8907	0.461821	0.498303	1.3932	1.22296	1.25968	0.990104	1.06845
HTRA2	0.804636	0.50393	0.63053	0.777087	1.27349	0.949425	0.763819	0.77677	0.659571	0.671771	0.365892	0.54542	0.918991	0.902217	0.697543	1.4063	0.750021
HTT	0.243179	0.891568	0.525422	0.584595	1.20339	1.21202	0.570614	0.336432	1.11044	0.455098	1.43416	1.15318	0.452088	0.916339	0.593616	0.171695	0.6645
IFNA1	0.461561	0.317835	0.701754	0.00594996	1.2907	1.70335	0.0151188	0.433242	0.364248	0.579406	1.02045	1.62798	0.101133	0.482191	0.200462	0.373092	0.531156
IFNA10	0.193432	0.585556	0.483419	0.314223	1.35005	1.33573	0.18551	0.276181	0.685376	0.435471	1.13197	1.52043	0.244334	0.541363	0.369292	0.196341	0.538176
IFNA13	0.619594	0.633334	0.395099	0.570485	1.21113	1.21839	0.820489	0.679749	0.532364	0.595745	0.461919	0.632529	1.2479	1.06291	1.11697	0.817322	0.81809
IFNA14	0.240659	0.610493	0.186211	0.630146	1.09565	1.2742	0.789153	0.273455	0.42207	0.266178	0.308499	0.504727	0.671713	0.594318	0.591313	0.601349	0.490796
IFNA16	0.52676	0.473609	1.94686	0.0550499	1.15452	1.79043	0.491923	1.28207	0.79657	0.717835	1.01017	2.10031	0.290625	0.629028	0.519544	0.534222	0.550964
IFNA17	0.300707	0.152437	0.701131	0.00579958	0.849195	2.14501	0.0147366	0.37374	0.0231983	0.40128	0.806316	2.15079	0.00698802	0.25019	0.00771693	0.136084	0.161739
IFNA2	0.251591	0.55936	0.457801	0.245311	1.07097	1.68372	0.659652	0.280397	0.748912	0.424611	1.06028	1.47305	0.279617	0.591653	0.429842	0.258189	0.316463
IFNA21	0.322466	0.23589	0.589494	0.352173	1.10035	1.54748	0.5179	0.407512	0.427152	0.301208	0.784628	1.50797	0.427771	0.666719	0.438537	0.395226	0.255529
IFNA4	0.833499	0.746203	0.728877	0.457245	1.09927	1.44349	1.01379	0.794982	0.934142	0.8153	1.21946	1.84815	1.24941	1.20289	1.19142	0.69446	0.88632
IFNA5	1.28666	0.329204	0.919398	1.15997	0.776679	1.06335	0.439918	1.27658	0.411202	3.23108	0.365075	0.589133	1.67472	1.46811	1.38116	0.929861	1.17393
IFNA6	1.14152	0.445291	1.34301	0.449822	1.1737	1.37648	0.783418	1.62486	0.591294	1.18644	0.73181	1.56778	1.39829	1.22432	2.06407	1.01835	0.863257
IFNA7	0.544391	0.667	1.03167	0.208409	1.02387	1.76772	0.992118	0.754608	1.21729	0.727471	1.40053	2.56014	0.259741	0.604833	0.861476	0.653768	0.414029
IFNA8	0.636085	0.566173	0.726522	0.587629	1.12186	1.29052	0.557416	0.629645	0.7334	0.63313	0.841971	1.38514	0.260783	0.52423	0.617531	0.899532	0.00675949
IFNAR1	2.75511	0.423789	2.98749	1.5298	0.556439	0.913757	0.472205	3.32421	0.087848	2.04476	0.0271708	0.0149242	2.93774	2.10633	3.46284	2.46536	1.71451
IFNAR2	0.875726	0.513159	0.977834	1.03225	0.796258	1.1715	0.462499	0.898366	0.504158	1.69669	0.879097	0.219422	0.389725	0.316354	0.292458	0.741582	0.358526
IFNB1	1.00293	0.815709	1.3474	0.904941	0.914099	1.18096	0.772873	0.851919	0.900177	1.14278	0.650867	0.591931	0.785782	0.581965	0.655877	0.968901	0.934415
IFNG	0.750756	0.544734	0.869971	1.09161	1.17684	0.731545	0.441397	0.602074	0.56648	0.838424	0.685175	0.35303	0.671149	0.469612	0.514097	0.729156	0.794232
IFNGR1	0.935602	1.06975	1.26111	1.28007	1.31642	0.403503	0.96342	1.02892	0.979346	1.45491	1.28676	0.822571	0.699577	0.605988	0.740891	0.888083	0.798027
IFNGR2	0.971993	0.809984	1.18771	1.30666	1.09929	0.594051	0.65121	0.948778	0.788525	1.29493	1.00363	0.631565	0.861462	0.625372	0.71614	0.940336	1.28887
IGF1	0.586872	0.881758	1.34734	1.33801	1.28176	0.380227	0.724736	0.877711	0.872143	1.04535	0.98874	0.589757	0.72554	0.843041	0.658136	0.828661	0.6628
IGF1R	1.13345	1.69771	1.44721	1.08668	0.803529	1.10979	1.67353	1.6191	2.04368	0.653373	0.560294	1.63676	1.27361	1.44494	1.16788	1.83584	1.4947
IGF2	2.4387	1.77094	3.53307	0.945152	1.25485	0.799996	1.83458	2.67053	2.10245	2.63482	0.949436	1.35648	1.03567	1.36027	1.31275	3.06114	1.40316
IGF2-AS	1.66457	1.1244	1.95147	1.13062	1.31492	0.554453	1.17671	2.1721	1.26895	1.96213	0.947267	0.955702	0.939102	1.10094	1.31148	1.9108	1.05126
IGF2R	1.33305	1.81823	2.20637	1.04841	1.16964	0.781948	1.81203	1.81161	2.18797	1.18007	0.939469	1.22493	1.04391	1.18864	1.2398	2.27581	1.16361
IGFBP4	0.842378	1.03568	0.759389	1.00917	1.15766	0.833169	0.553447	0.670202	1.15672	0.837903	0.993266	0.756119	0.729235	0.809071	0.862555	0.653803	0.766804
IHH	0.884119	0.664278	0.920144	1.38032	1.01083	0.60885	0.675629	1.15973	0.771946	1.16322	0.548777	0.527734	0.997616	0.811168	1.31022	0.93201	0.70821
IKBKB	0.820353	0.692228	1.0296	1.21475	0.956434	0.828812	0.529279	1.16297	0.770406	0.857017	1.10551	0.633083	0.481381	0.592267	0.572715	0.87243	0.405715
IKBKE	4.72736	0.718046	4.23147	1.15676	0.794153	1.04909	0.895154	3.85489	0.705553	2.4552	0.605671	0.589572	1.58582	1.78344	1.3637	4.43263	1.39643
IKBKG	0.687352	0.342595	0.714827	0.77186	0.943153	1.28499	0.231382	0.609141	0.439472	0.537166	0.649716	0.65407	0.360484	0.592395	0.453552	0.682602	0.371936
IL10	2.26577	0.248453	2.88638	1.1706	1.19291	0.63649	0.255298	1.78028	0.33188	1.15879	0.396488	0.428948	1.01739	1.74249	1.06487	1.65892	1.11616
IL10RA	1.60174	0.706202	0.991106	1.25333	0.952396	0.794276	0.76709	1.37268	0.617432	1.04193	0.479958	0.693165	1.4965	1.68242	1.5131	1.46375	1.5184
IL10RB	0.848465	0.800885	0.907759	0.961731	1.13727	0.900998	0.76262	0.924638	1.0799	1.05331	1.30731	1.24573	0.741714	0.854344	0.813937	0.877102	0.929379
IL11	0.57848	0.54829	0.765255	1.31654	1.01225	0.671216	0.533613	1.22455	0.746847	0.846472	0.936465	0.980236	0.59282	0.41621	0.722622	0.680864	0.51176
IL11RA	0.702829	0.451466	0.938353	1.46967	1.17109	0.359232	0.512593	1.18672	0.598383	0.785731	0.364929	0.54569	0.771866	0.394902	0.848367	0.627471	0.415973
IL12A	0.375145	0.750194	0.977723	1.2314	1.13705	0.631555	0.6625	0.675315	1.17235	0.538234	1.71451	1.26406	0.745761	0.835703	0.536996	0.3728	0.566306
IL12B	0.452273	0.477042	1.0228	0.872358	1.181	0.946641	0.643904	0.55136	0.700734	0.664882	1.22349	0.906373	0.386509	0.366467	0.383041	0.400448	0.431018
IL12RB1	1.0407	0.375064	0.829431	1.22483	0.978906	0.796265	0.409632	0.963622	0.422808	2.22968	0.339225	0.386031	1.0354	0.870637	1.25607	0.708647	0.547102
IL12RB2	0.53729	0.549389	0.388818	0.710811	1.23883	1.05036	0.582842	0.505709	0.590367	0.563207	0.60893	0.652495	0.532347	0.645306	0.507253	0.749768	0.577498
IL13	0.54091	0.801743	0.457729	1.02416	1.18063	0.795203	0.84762	0.479114	0.891489	0.593063	0.910474	0.851577	0.857314	0.998054	0.769362	0.484179	0.794577
IL13RA1	0.930499	0.393574	0.873739	1.13199	1.17569	0.692321	0.499494	1.40899	0.430642	1.04324	0.36526	0.509209	1.09053	0.795864	1.23729	0.9846	0.768988
IL13RA2	0.69608	1.04625	1.0071	0.852618	1.08041	1.06698	1.2084	1.17707	1.46214	0.995878	0.916377	1.11535	0.896193	1.0771	0.805627	1.45966	0.862391
IL15	0.720678	0.784589	0.919734	0.772855	1.11145	1.11569	0.824748	0.798746	0.976713	0.811544	1.09789	0.914242	0.87148	1.00136	1.00258	0.752014	0.924018
IL15RA	1.30618	0.717446	0.973272	0.936069	1.06203	1.0019	0.740848	1.20795	0.85038	1.10237	0.874178	0.735756	1.33175	1.44389	1.46864	0.979527	1.22724
IL16	2.14228	0.392762	2.88733	1.53363	0.673389	0.792984	0.390814	2.57334	0.497337	4.06508	0.571464	0.353793	0.814162	0.924293	1.33736	2.41334	0.781227
IL17A	0.499237	0.533506	0.600559	0.595192	1.29313	1.11168	0.617737	0.540643	0.681122	0.424035	0.832406	0.454712	0.67157	0.765801	0.453362	0.836027	0.492578
IL17RA	1.08568	1.47314	1.09357	0.834179	1.14453	1.02129	1.67467	1.25625	1.4421	0.829139	0.661923	1.41679	1.2908	1.19356	1.32543	1.36222	1.36411
IL17RC	1.12232	0.715302	0.699026	0.742315	1.13958	1.11811	0.87096	0.883051	0.778247	0.94005	0.643831	0.8989	1.36565	1.67609	1.13645	1.05928	1.50511
IL18	2.97137	0.352517	3.55945	0.855216	1.27859	0.86619	0.599472	2.31397	0.243093	2.0373	0.227597	0.334937	1.44947	1.83319	1.43433	2.23579	1.79456
IL18R1	0.933671	0.811796	1.07134	0.390502	1.25002	1.35948	0.834809	0.768604	0.951014	1.17155	1.14408	1.75963	0.663455	0.767545	0.729571	0.819182	0.940841
IL19	1.10577	0.518594	0.726832	0.829368	1.00666	1.16397	0.767905	0.899024	0.453273	2.01272	0.330689	0.473189	1.06955	0.997744	1.12519	0.864414	0.927624
IL1A	1.33895	0.569037	2.27349	0.34794	1.16558	1.48648	0.788424	1.59667	0.714101	2.01821	1.08606	1.58205	0.457438	0.637842	0.566226	1.29625	0.479911
IL1B	0.992403	0.895443	1.11857	0.498027	1.46964	1.03234	1.09712	1.198	0.918676	1.11367	1.06198	1.44017	1.02721	1.12847	0.875426	1.47305	0.90954
IL1R1	0.783669	1.08505	1.88495	0.397945	0.939465	1.66259	1.26387	1.00353	1.27203	1.1533	1.88234	2.32082	0.859498	1.01633	0.642759	0.954538	0.961692
IL1R2	1.1686	0.334215	1.19913	0.492318	1.02216	1.48552	0.633656	1.29344	0.400118	0.882744	0.603932	1.35731	1.71855	1.46011	1.54111	1.11795	1.08616
IL2	1.19981	0.761281	1.57175	0.462833	1.06853	1.46863	0.944886	1.07492	0.810485	1.25078	1.05983	1.31427	0.698405	0.794214	0.536279	1.77971	0.422018
IL20	1.8431	1.09148	2.63197	0.707534	1.09778	1.19468	1.16421	2.00879	0.787292	2.99739	0.557096	0.768261	0.802886	1.06635	0.943455	1.94942	0.898342
IL20RA	1.06974	0.58629	1.10488	0.821902	0.952389	1.22571	0.800868	1.07678	0.70268	0.96956	0.654511	1.07582	1.63567	1.51105	2.31158	1.03744	1.04802
IL21	0.643303	0.408927	0.624036	0.826815	0.891654	1.28153	0.550357	0.821914	0.368049	1.06249	0.300222	0.499021	0.986508	0.896424	1.09443	0.756888	0.614825
IL22	0.979201	0.645689	0.753311	0.545313	1.04641	1.40828	0.815236	0.77583	0.574132	0.870282	0.688623	1.08239	1.22083	0.814668	0.854914	1.18141	0.461947
IL22RA1	1.08944	0.751806	1.39919	0.847826	0.935867	1.21631	1.0687	1.83085	1.11716	1.29366	1.64725	2.09253	0.727404	0.68976	0.673781	1.33373	0.00604764
IL22RA2	1.898	0.593107	1.97535	1.30722	0.510879	1.1819	0.851207	2.17183	0.54996	4.56551	0.232138	0.288746	1.49496	0.834136	2.1574	1.65845	0.933716
IL23A	1.7496	0.884168	1.04736	1.39348	0.631115	0.975409	0.967044	1.47997	0.744707	1.65219	0.433102	0.560941	2.15503	1.57507	2.23732	1.34347	2.02787
IL23R	1.47428	1.53572	1.15126	1.07599	1.06856	0.855449	1.51536	1.52841	1.22656	1.42639	0.485981	0.965318	1.12617	1.01481	1.17778	1.87522	1.21612
IL24	1.07821	0.856982	0.693952	1.2298	1.02603	0.744171	0.870967	0.390159	0.64181	0.472342	0.591303	0.513777	0.615864	1.01926	0.595155	1.46974	0.551779
IL26	0.492201	0.825303	1.03019	1.42578	1.55852	0.0156993	1.17291	0.639134	0.767513	1.03138	1.52513	0.415155	0.581133	0.441219	0.621469	0.478069	0.669737
IL2RA	0.666794	1.76005	0.892075	1.23259	1.23602	0.531393	1.88231	0.670073	1.64433	0.861449	1.65028	1.3951	1.16092	1.14225	1.12671	0.705796	1.24515
IL2RB	0.459072	0.776992	0.759684	1.41989	1.16389	0.416219	1.01583	0.698687	0.775831	0.771422	0.616608	0.571704	0.804443	0.655271	0.686168	0.32505	0.818322
IL2RG	1.05954	0.915018	0.769431	1.49861	1.2238	0.277588	0.933092	1.27983	0.656857	1.02743	0.35614	0.631968	1.93539	1.62641	2.48199	0.674278	1.87735
IL3	0.33043	0.836677	0.426109	1.20695	1.20116	0.591884	1.01552	0.381186	1.0178	0.500707	0.881057	0.660468	0.516813	0.986436	0.626896	0.369864	0.67601
IL3RA	0.707539	0.804695	1.0549	1.27966	1.30171	0.418631	0.964376	1.00544	0.782759	0.940561	0.726865	0.51529	0.578585	0.552667	0.635365	0.968718	0.517968
IL4	1.47654	0.612579	1.0172	1.26947	1.15947	0.571062	0.801549	1.34414	0.814447	1.33792	0.527009	0.538296	1.44277	1.48942	1.84465	1.00516	1.12462
IL4R	1.18579	0.818368	0.74842	1.01217	1.12596	0.86187	0.893833	0.993043	0.923364	1.30334	0.521766	0.563524	0.857723	1.10651	1.05767	1.15694	0.869022
IL5	1.09365	0.784646	1.06294	1.14224	1.26288	0.594883	0.906715	1.36359	0.905419	0.98319	0.634256	0.603556	1.66491	1.29222	2.07128	1.00203	1.13761
IL5RA	0.582167	0.931898	0.937486	1.08322	1.27722	0.639555	0.850841	0.738833	1.11825	0.925421	1.22689	0.714166	0.597117	0.724644	0.637163	0.616111	0.642118
IL6	0.804307	0.809633	0.963569	0.64828	1.09699	1.25473	0.788385	0.692783	1.28481	0.923136	1.29087	0.979689	0.600853	0.892281	0.632782	0.788611	0.960263
IL6R	0.767457	1.0097	0.88392	1.20593	1.07681	0.717261	1.04371	0.7925	1.015	0.564653	0.597122	0.797131	1.88112	1.25086	1.85859	0.931689	1.0984
IL6ST	0.455151	0.641422	0.278706	0.761543	1.07596	1.16249	0.570766	0.243618	0.669344	0.479654	0.648192	0.558019	0.396245	0.540216	0.541169	1.19542	0.441785
IL7	0.42685	0.809275	0.383262	1.01573	1.07625	0.90802	0.866451	0.366071	0.916744	0.587338	1.04905	0.758443	0.72749	0.777306	0.856968	0.528689	0.730051
IL7R	0.781289	0.57075	0.687491	0.966866	0.753382	1.27975	0.576381	0.638433	0.661636	0.685419	0.711581	0.645564	0.58651	0.742473	0.56348	0.738009	0.636454
IL9	1.20741	0.879331	0.650545	1.07362	1.11362	0.812763	0.826143	1.0344	0.68393	0.907143	0.410582	0.668894	1.15891	1.08763	1.24595	1.61463	1.1768
IL9R	1.04113	0.563905	1.26815	0.652124	1.04958	1.29829	0.664079	0.946204	0.740806	1.55205	0.730838	0.785005	0.48655	0.693433	0.547064	1.05602	0.606903
ILK	1.86568	1.3079	2.36474	0.792471	1.20357	1.00396	1.35109	1.9116	1.48267	2.9569	0.882738	1.04273	0.8584	0.946892	1.06946	1.97656	0.871857
IMPG1	0.885572	0.79392	0.970101	0.90441	1.06539	1.0302	0.870011	0.988096	1.05623	1.13633	1.06523	1.13594	0.789952	0.970855	0.944229	0.98141	0.874806
INS	2.3194	1.09211	2.52889	1.14713	0.869255	0.983614	1.15078	1.93902	1.46021	2.62836	1.79211	1.81433	1.15582	1.34264	1.12847	2.44197	1.25737
INSR	0.247547	0.0220241	0.0919515	0.959452	0.434602	1.60595	0.0198089	0.156107	0.0561464	0.332959	0.862346	1.71596	0.00939324	0.0136106	0.010373	0.6276	0.143327
INSRR	0.815089	0.525024	0.882244	1.11339	1.29357	0.593038	0.697753	0.940536	0.68771	0.736324	0.806971	0.908136	1.06527	0.913391	1.47965	0.753604	0.850675
IRAK1	1.19652	0.705794	1.07897	1.26271	1.04534	0.691959	0.81051	1.18283	0.983361	1.06235	1.08897	1.05126	1.15102	1.2126	1.18923	1.00423	0.880192
IRAK2	0.708118	0.484638	0.799721	1.13612	1.24216	0.62172	0.572193	1.11231	0.58417	0.997698	0.621485	0.635572	0.758985	0.544216	0.920397	0.776927	0.48209
IRAK3	0.901056	0.943358	0.898129	1.14541	0.953294	0.901299	0.819242	0.787674	1.02797	0.814615	1.51126	1.25717	0.826981	0.93908	0.794159	0.990385	0.867611
IRAK4	1.00338	0.634016	1.03292	1.01253	0.997215	0.990251	0.692048	0.829424	0.782323	0.999107	0.98029	0.78311	0.612354	0.713981	0.524209	1.3889	0.636878
IRF9	0.696203	0.730488	0.476486	1.04842	1.39388	0.557703	0.838881	0.710238	0.481482	0.627928	0.505273	0.559721	0.735832	0.537729	0.597032	1.28748	0.432118
IRS1	1.32504	0.728005	0.757325	0.876839	1.13299	0.990168	0.851491	0.986155	0.612282	0.75024	0.710299	0.758817	1.79563	1.15629	1.21508	1.14454	0.954381
IRS2	0.554282	0.866662	0.663383	0.667216	1.07899	1.2538	0.853276	0.472463	1.13882	0.651219	1.33071	1.11022	0.668595	0.662217	0.690777	0.625047	0.709477
IRS4	0.894593	0.656494	1.20793	0.751497	0.923517	1.32499	0.663398	0.969963	0.944129	1.14931	1.35013	0.828102	0.542231	0.51851	0.461731	1.10756	0.552208
ITCH	0.713473	0.198644	0.915707	0.92798	0.885714	1.18631	0.333121	0.825987	0.302154	0.767922	0.890752	0.287828	1.04031	0.948943	1.14357	0.681069	0.596395
ITGA1	0.30444	0.65067	0.458426	0.813387	0.951243	1.23537	0.600221	0.372524	0.842732	0.380258	1.2811	0.747899	0.49495	0.527998	0.613573	0.419305	0.727177
ITGA10	0.480519	0.736995	0.575592	0.818861	0.932105	1.24903	0.702264	0.442615	0.87813	0.559938	1.10481	0.691139	0.846547	0.709633	0.689853	0.445085	0.765715
ITGA11	0.374559	0.981161	0.940068	0.771222	0.796749	1.43203	0.890843	0.575404	1.24835	0.574416	1.45319	1.03002	0.759564	0.786975	0.688637	0.342467	0.930136
ITGA2	0.777309	0.628375	0.564811	0.740466	1.06024	1.19929	0.64144	0.74506	0.867537	0.657254	0.991777	0.745537	0.950177	1.21469	0.85882	0.607666	0.895657
ITGA2B	0.369922	0.624286	0.524309	0.39894	1.07658	1.52448	0.507466	0.417263	0.882418	0.554769	1.13313	0.9938	0.550926	0.65208	0.549418	0.275373	0.721806
ITGA3	1.49542	0.740811	1.10995	0.89302	0.896514	1.21047	0.786022	1.22403	1.07108	2.33425	0.991425	1.10323	0.79972	1.3052	1.33248	0.850057	1.01438
ITGA4	0.536922	0.714628	0.656243	0.75711	1.15299	1.0899	0.70099	0.607718	0.903668	0.739997	1.23413	1.17285	0.595986	0.905785	0.702466	0.454926	0.728964
ITGA5	1.16005	0.855751	1.03714	0.793622	1.11078	1.0956	1.11268	1.24227	0.657249	1.33622	0.335584	0.759235	1.24372	1.03009	1.06828	1.17837	1.11113
ITGA6	0.574134	0.793263	0.934961	0.523046	1.28108	1.19588	0.928806	1.07504	0.841175	0.70416	0.937261	1.37992	0.87459	0.732457	0.997525	0.66167	0.614628
ITGA7	1.56507	1.10676	1.47421	0.797351	1.16104	1.0416	1.41703	1.79808	0.926353	1.96028	0.45017	0.937687	1.26829	1.41581	1.23129	1.89927	1.36802
ITGA8	0.761667	1.05183	0.798835	0.449879	1.0308	1.51932	1.24324	0.68861	1.31321	1.00016	1.46975	2.00358	0.928905	1.09549	0.948444	0.840935	0.985612
ITGA9	0.576913	0.756101	0.717961	0.411617	1.15856	1.42982	0.955003	0.551729	0.819154	0.659557	1.26478	1.65681	0.798653	0.7448	0.559747	0.7323	0.626433
ITGAD	0.694365	0.541311	0.998909	0.147821	0.602317	2.24986	0.974611	0.711299	0.702779	0.538484	1.17936	2.46167	0.753491	0.719451	0.407544	0.597636	0.677733
ITGAE	1.34385	0.516609	0.900911	0.990831	0.986888	1.02228	0.685104	1.04722	0.607496	1.72233	0.559353	0.861439	1.33951	1.40676	1.52691	0.976852	0.986429
ITGAL	2.49971	1.25593	3.63121	0.865727	0.938189	1.19608	1.6712	3.11578	1.15547	0.767398	0.728103	1.28963	2.3377	2.71164	2.38528	3.56905	2.47378
ITGAM	0.515387	0.477746	0.606351	0.306646	0.669566	2.02379	0.710148	0.556417	0.537075	0.528007	0.656727	1.12755	0.739788	0.685842	0.749057	0.580231	0.516415
ITGAV	0.393419	0.53511	0.290262	0.464091	0.887535	1.64837	0.685079	0.383853	0.434726	0.409694	0.537815	0.750375	0.768767	0.582717	0.466249	0.581513	0.221336
ITGAX	0.448668	0.797517	0.228171	0.734296	0.924835	1.34087	0.89295	0.362039	0.465661	0.663617	0.405328	0.656507	1.20417	0.910438	0.993292	0.818611	0.796931
ITGB1	1.23567	0.218473	1.12008	0.949132	1.04473	1.00614	0.327944	1.21148	0.180861	1.87712	0.186775	0.437724	1.38851	1.11003	1.57743	0.997688	0.841281
ITGB2	0.914234	0.354725	0.871808	1.16104	0.915241	0.923719	0.419478	1.08005	0.313333	1.83147	0.346537	0.520086	1.42442	0.799703	1.46131	0.872678	0.614999
ITGB3	0.719318	0.652723	1.09877	1.1402	0.982382	0.877416	0.823305	1.42324	0.653391	0.877896	0.492582	0.37497	0.679785	0.777702	0.634656	0.96307	0.442265
ITGB4	1.22421	0.656311	0.917108	0.929148	0.461721	1.60913	0.771396	1.1961	0.828544	1.07087	0.437438	0.551873	0.953689	1.15814	0.933771	1.74377	1.12649
ITGB5	1.32821	0.686411	1.17343	1.3345	0.799692	0.86581	0.878562	1.38873	0.596415	1.78167	0.194719	0.363833	1.48881	1.08232	1.66528	1.02849	0.905658
ITGB7	2.43054	2.11166	2.90782	0.952965	0.897594	1.14944	2.01259	2.29943	2.37583	2.37103	1.13745	2.00455	1.32856	1.13782	1.32661	2.8556	1.63461
ITGB8	1.04589	1.08774	1.17235	1.11339	1.14373	0.742881	1.25891	0.882774	1.20499	1.05309	1.31574	0.970923	0.807191	0.989207	0.785091	1.44467	0.797334
ITK	0.977667	1.23103	0.888454	1.09101	1.07446	0.834528	1.32285	0.848808	1.43294	0.905873	1.13173	1.17019	1.28593	1.46708	1.4514	0.842703	1.62794
ITPR1	1.18644	0.676034	1.68246	1.26587	1.14936	0.584765	0.856817	1.18109	0.767618	1.4137	0.88154	0.427863	0.599478	0.895927	0.678137	1.34902	0.618949
ITPR2	1.57436	1.41438	2.11658	0.877619	1.16677	0.95561	1.49072	1.78298	1.54893	2.16165	0.771868	1.24901	1.16678	0.994973	1.27682	1.83751	1.48647
ITPR3	1.11399	0.230938	1.3935	0.608037	1.43878	0.953187	0.590187	1.16182	0.293077	1.2985	0.018675	0.20101	0.317675	0.46093	0.48572	1.17929	0.510931
JAK1	0.546243	0.34014	0.611035	1.06261	1.21489	0.722496	0.488572	0.571738	0.46274	0.880079	0.467672	0.263349	0.402294	0.431157	0.397121	0.546227	0.407458
JAK2	1.13175	0.460044	0.73989	1.16696	1.15947	0.673569	0.584047	1.00251	0.584647	0.897221	0.33578	0.32978	0.922145	1.11739	1.32534	0.84264	0.834121
JAK3	0.636975	1.114	0.865164	1.02678	1.03371	0.939511	1.1934	0.915164	0.853212	0.506639	0.762728	0.560035	1.16301	1.58429	0.998951	0.898183	0.860482
JUN	0.794736	0.609636	0.988079	0.817064	1.19344	0.989499	0.430676	0.918533	0.937546	1.18447	0.895783	0.388142	0.427922	0.709737	0.544546	0.672622	0.603094
JUNB	0.624964	0.731906	0.969722	0.720827	1.37709	0.902084	0.632483	0.841003	1.12569	0.807429	1.15792	0.754264	0.453059	0.608598	0.52062	0.567933	0.648315
JUND	2.8469	0.208635	2.83707	0.885207	1.3928	0.721988	0.220315	3.84048	0.364377	2.90338	0.588111	0.224902	0.454058	0.704099	0.444954	2.10809	1.7373
KAT2B	0.517113	0.699276	0.726024	0.719318	1.10604	1.17464	0.696128	0.482815	1.01531	0.74732	1.38398	0.933128	0.480522	0.810334	0.506059	0.37154	0.839386
KCMF1	0.598534	0.703536	1.17174	0.556764	1.08186	1.36138	0.604565	0.837283	0.955442	0.873106	1.09987	0.871553	0.374928	0.458612	0.530932	0.695098	0.773557
KCNK1	0.492173	0.758233	0.713882	0.678595	1.10337	1.21804	0.804958	0.522026	0.940824	0.730105	1.25506	0.807751	0.445753	0.560573	0.437146	0.50525	0.571782
KCNK10	1.75423	1.02861	1.14254	1.0242	1.14418	0.831619	1.02308	2.11214	1.20248	1.05061	0.686323	0.772043	1.25985	1.69309	1.5045	2.11208	1.12053
KCNK12	1.33616	0.345478	1.06784	0.78635	1.11129	1.10236	0.470167	1.33951	0.611663	1.18923	0.494035	0.659182	0.537824	0.571081	0.703188	1.38532	0.469712
KCNK13	0.494124	0.435899	0.420045	1.56407	0.883431	0.552496	0.439254	0.693342	0.534822	0.641533	0.255565	0.415603	0.691184	0.398202	0.709387	0.582327	0.325251
KCNK15	0.67681	0.389388	0.598595	1.75735	0.735006	0.507644	0.458969	0.565182	0.527823	2.56346	0.472303	0.442551	1.4269	1.29143	1.11677	0.495419	0.562137
KCNK16	1.1756	0.553845	0.83862	1.41209	0.830558	0.757347	0.637018	1.06134	0.704636	1.97172	0.56678	0.685412	1.04972	0.918794	1.234	1.00496	0.678743
KCNK17	1.2078	0.647671	0.935568	1.85489	0.619459	0.525655	0.727779	1.3515	0.777505	1.13552	0.667145	0.84015	1.37539	0.966007	1.57629	1.2148	0.790605
KCNK2	0.837518	0.613399	0.773449	1.57481	0.878968	0.546225	0.761023	1.18556	0.700197	0.798268	0.631632	0.821854	1.46615	0.979316	1.81666	0.768505	0.780247
KCNK3	1.90832	1.05037	1.68764	1.06349	1.01714	0.919379	1.14244	1.85612	1.4464	1.98865	1.48534	1.52997	0.971742	1.31878	1.23656	1.96442	1.13199
KCNK4	1.57303	1.78535	1.67106	1.25361	0.910649	0.835737	1.79904	1.75789	2.38725	1.29059	1.00635	1.83825	1.70791	1.57811	1.73935	2.07903	1.8791
KCNK5	0.941609	0.731307	0.964871	1.55388	0.951167	0.494957	0.769737	1.03793	0.779892	0.882774	0.692623	0.726121	1.51634	0.978807	1.85812	0.780989	0.995968
KCNK6	0.734475	0.442412	0.895184	1.34366	1.23282	0.423517	0.545975	1.07579	0.5039	0.618016	0.657025	0.622182	1.01882	0.912891	1.41002	0.581271	0.81615
KCNK7	0.899455	0.874438	1.10914	1.01405	1.05117	0.934776	0.838295	0.796678	0.899364	0.827303	1.36527	1.03611	0.984556	0.899473	0.795378	1.44819	0.80543
KCNRG	0.898616	0.926354	1.09717	0.915907	1.09238	0.991709	1.04092	0.768813	1.11044	0.895278	1.45068	1.13699	0.928836	1.03226	0.838632	0.997266	0.872962
KCNT1	0.728101	0.775226	0.833953	0.96356	0.85172	1.18472	0.832716	0.629965	0.970984	0.689755	1.45897	1.08564	0.817296	0.866346	0.735619	0.836533	0.91123
KCNT2	0.806749	0.858554	0.600661	0.976476	1.28801	0.735512	1.06913	0.623	0.896127	0.531248	0.705928	0.873759	1.33958	1.01298	0.915765	1.63754	0.678063
KCNU1	0.425074	0.522779	0.631235	0.7463	0.885137	1.36856	0.298122	0.36788	0.476266	0.435228	1.50341	0.579785	0.363341	0.160783	0.318712	0.509244	0.425588
KCNV1	0.450555	0.374532	0.776739	0.784746	0.809401	1.40585	0.692819	0.494111	0.674388	0.400117	1.45043	0.601243	0.403924	0.199288	0.230309	0.553901	0.25573
KCNV2	0.734089	0.693661	1.16663	0.751587	0.941035	1.30738	0.673433	0.732539	0.975265	0.951633	1.46119	0.755322	0.49972	0.500596	0.428872	0.981943	0.529117
KCTD1	0.997115	0.431832	1.37382	0.686158	0.823964	1.48988	0.359041	1.13049	0.736244	0.920617	1.29213	0.398246	0.27686	0.191106	0.174148	1.46883	0.344515
KCTD11	0.744525	1.14283	0.543779	0.821761	1.18046	0.997782	1.60208	1.02325	1.47954	0.33814	0.778038	1.3271	1.71933	1.58896	1.1558	1.54534	1.24015
KCTD12	0.564442	0.72531	0.460733	0.770558	1.20723	1.02221	1.1032	0.649065	0.689859	0.50951	0.595769	0.494567	0.89814	1.04313	0.513404	1.01757	0.532223
KCTD13	0.671908	0.458788	0.5239	0.755777	1.17057	1.07365	0.743542	0.735803	0.393333	0.618422	0.266442	0.381198	1.03313	0.850776	0.925844	0.885339	0.953432
KCTD14	0.739473	0.427949	0.849716	0.659779	1.11119	1.22903	0.469587	0.752067	0.52279	0.674514	0.633022	0.642464	1.54085	0.983902	1.52739	0.756621	0.840552
KCTD15	1.33587	0.964102	1.4892	0.83438	1.25284	0.91278	1.09283	1.31028	0.66391	1.23356	0.318902	0.835361	1.34026	1.09775	1.30478	1.41157	1.49023
KCTD2	0.711803	0.657459	0.972815	0.710139	1.01331	1.27655	0.671953	0.91266	0.889778	0.780545	3.22508	1.29252	0.752832	0.855414	0.725767	0.736048	0.753796
KCTD3	0.44445	0.402759	0.718679	0.337377	1.03633	1.62629	0.499661	0.48764	0.747795	0.625266	1.10241	1.61099	0.6045	0.556948	0.472853	0.352824	0.763103
KCTD4	0.559969	0.903326	0.674175	0.363263	0.9102	1.72654	0.96629	0.513194	1.21325	0.780544	1.67581	2.09729	0.944392	0.876703	0.689692	0.409445	1.01567
KCTD5	0.291737	0.874044	0.641031	0.372763	1.21184	1.41539	0.994781	0.440848	1.04881	0.681718	1.38765	1.84407	0.797793	0.871178	0.589075	0.430001	0.694566
KCTD6	0.857804	0.672141	0.801019	0.814369	1.19911	0.986526	0.951174	1.10909	0.752797	0.796053	0.827514	1.31849	2.03552	1.48946	2.09764	0.796683	1.19952
KCTD7	1.44376	0.668845	1.29276	0.750007	0.855394	1.3946	0.847687	1.17314	0.780972	1.08068	0.951516	1.39969	1.78797	1.78016	1.47822	0.888965	1.36037
KCTD8	1.32392	0.329589	1.87005	0.918768	1.02316	1.05807	0.605908	1.80457	0.253019	1.07874	0.538866	0.970088	1.8711	1.67358	2.00287	1.18277	0.824951
KCTD9	0.566533	0.561252	0.998224	0.307107	0.78439	1.9085	0.979131	0.734974	0.781394	0.807361	1.2516	1.54337	0.662145	0.700575	0.49554	0.619495	0.264232
KDELR1	0.257193	0.405236	0.626316	0.30154	0.603037	2.09542	0.666622	0.39537	0.39521	0.215466	0.956548	1.58463	0.544413	0.598691	0.574897	0.274974	0.356993
KDELR2	0.575742	0.580385	0.620295	0.456164	0.705155	1.83868	0.922099	0.62735	0.683124	0.643402	0.938707	1.32767	0.79834	0.782859	0.792188	0.650038	0.412984
KDELR3	0.491524	0.731005	0.427921	0.568246	0.970073	1.46168	0.750735	0.490691	0.542423	0.629452	0.562286	0.802455	1.1116	0.84315	0.908296	0.564801	0.499353
KDR	1.82006	1.80512	2.29901	0.678375	1.06184	1.25979	1.83724	2.06957	1.45269	3.07057	0.854445	1.8188	1.14012	1.20028	1.33437	2.1743	1.33671
KIT	0.337404	0.341391	0.337268	0.463091	0.651934	1.88498	0.496658	0.37386	0.339085	0.498111	0.603966	0.823084	0.210098	0.33856	0.347935	0.394678	0.0504147
KITLG	0.924529	1.06783	1.36167	0.983631	0.784906	1.23146	1.18313	1.17281	1.15936	0.857952	0.396398	0.906716	1.29001	1.56607	1.13208	1.74375	1.34684
KLF10	2.34125	1.57656	3.25056	0.718266	1.07072	1.21102	1.34219	2.63188	1.36886	2.59906	0.477981	0.833687	0.966134	1.06174	1.17617	2.99615	1.1883
KLRC3	0.601133	0.515265	0.804333	0.878975	0.853194	1.26783	0.612552	0.532219	0.543039	0.536397	0.776015	0.197537	0.422423	0.566071	0.445972	0.430217	0.449182
KNDC1	1.75548	1.26836	1.35176	1.15647	0.984347	0.859181	1.27351	1.62778	1.11476	1.08304	0.739849	1.03935	2.00975	1.75759	2.2855	1.32684	2.08085
KPNA1	0.408047	0.81789	0.781901	1.19835	1.0243	0.77735	0.876761	0.527446	0.893354	0.524633	1.06691	0.403654	0.36799	0.687791	0.441638	0.897381	0.354033
KRAS	2.38218	2.39349	3.60222	0.895481	0.692214	1.4123	2.47572	2.91679	2.79089	2.82904	1.35623	1.88432	0.95233	1.20009	1.24329	2.78208	1.23967
KREMEN1	1.82773	0.877916	1.73381	1.25275	1.08969	0.657567	1.03079	1.64741	1.10319	2.21006	0.808903	0.774971	1.10077	1.32272	1.42807	1.5126	1.01499
KREMEN2	1.6863	1.32638	1.20986	1.06151	1.14959	0.788905	1.39144	1.39414	1.18828	1.4612	0.792811	1.02566	1.18698	1.66007	1.28744	1.3224	1.47753
LAMA1	1.11107	1.06463	1.36922	0.728505	0.96634	1.30516	1.15658	1.34556	1.23209	1.2627	0.725396	0.79397	0.676002	0.817148	0.821907	1.48217	0.788634
LAMA2	1.50203	0.736036	1.28814	1.02836	0.987707	0.983932	0.807755	1.50065	0.459708	1.34757	0.240917	0.465394	1.18591	0.978836	1.1625	1.92579	1.31746
LAMA3	1.1012	0.953352	1.38257	0.755692	0.989889	1.25442	0.929111	1.25192	1.09623	1.46739	0.568195	0.686134	0.666906	0.751424	0.663166	1.55393	0.810374
LAMA4	0.660067	0.558173	0.898891	0.891504	1.2183	0.890198	0.594077	0.713505	0.867648	0.800864	0.94224	0.484531	0.423615	0.680882	0.524352	0.938406	0.523013
LAMA5	0.673113	0.373128	0.987576	0.664145	1.35234	0.983518	0.414692	0.732094	0.848588	0.657833	0.703989	0.493846	0.373528	0.426999	0.443565	0.578578	0.738924
LAMB1	0.619035	1.03612	0.982872	1.08525	1.23757	0.677187	0.951795	0.901645	1.34099	0.982071	1.51345	0.929767	0.665896	0.933916	0.772213	0.585025	0.7328
LAMB2	0.562281	0.958003	0.802779	0.906931	1.26058	0.832488	0.946527	0.753381	1.2796	0.958311	1.27735	0.980637	0.659667	0.730606	0.701412	0.498126	0.808377
LAMB3	1.62804	0.508147	0.8999	1.27176	1.02917	0.69906	0.541079	1.84579	0.53151	1.30224	0.370943	0.49846	1.19555	1.57294	1.56212	1.2028	1.2989
LAMB4	0.438286	0.236211	0.638824	0.738279	1.03565	1.22607	0.27163	0.454467	0.42339	0.53927	0.84088	0.453742	0.228723	0.293828	0.298532	0.371477	0.394537
LAMC1	0.587995	0.404736	1.29265	0.691255	1.05042	1.25832	0.407961	0.833499	0.540679	0.925047	0.762786	0.514134	0.273672	0.358374	0.325094	0.76666	0.261953
LAMC2	1.26854	1.76848	2.37093	0.825885	1.23397	0.940144	1.75818	1.74915	2.02468	1.86732	1.59475	1.83194	1.00126	0.860913	1.10461	1.69236	1.14207
LAMC3	1.19662	1.74629	1.20646	1.10339	1.16499	0.731618	1.52797	1.51425	1.66914	0.74338	0.799528	1.53896	1.18468	1.08817	1.15753	1.75205	1.24987
LAMTOR3	0.342733	0.793295	0.529788	0.839745	1.12304	1.03721	0.764845	0.35572	0.973797	0.440064	1.18212	0.943974	0.442345	0.702101	0.573485	0.322369	0.633393
LAT	1.5555	0.653753	1.18003	1.27544	0.963733	0.760826	0.709362	1.31409	0.726556	1.53499	0.598593	0.767267	1.576	1.31142	1.98784	1.17991	1.28681
LCK	0.973806	0.70701	0.949409	1.59081	0.727079	0.682112	0.753713	1.20668	0.851287	1.65431	0.869834	0.811596	1.23959	0.881379	1.92002	0.827255	0.861934
LCP1	1.38592	0.418682	1.5836	1.31951	1.00232	0.678171	0.528083	1.49941	0.516217	1.93129	0.631181	0.779828	1.11394	0.682609	1.14915	1.06339	0.885187
LCP2	1.17484	1.50619	1.10203	1.2364	0.772859	0.990746	1.52666	1.32893	1.42125	1.16809	0.67771	1.2381	1.42096	1.25431	1.30589	1.52399	1.266
LEF1	1.84576	0.789365	1.69575	1.22138	0.8075	0.971123	1.03676	1.91332	0.879457	0.926404	0.974814	0.973296	1.25226	1.14085	1.10225	3.1472	0.882476
LEFTY1	1.32791	0.448281	1.15999	1.48654	0.635034	0.878427	0.635968	1.37766	0.628165	1.53431	0.818861	0.783498	1.05418	1.20768	1.23804	1.11703	0.827641
LEFTY2	1.48228	0.94838	1.33888	1.11222	0.881632	1.00614	1.11013	1.36161	1.30096	1.02955	1.534	1.53405	1.51172	1.41271	1.50311	1.31209	1.34561
LFNG	1.39612	0.285977	1.30615	1.19267	0.673179	1.13415	0.627126	1.35447	0.0246785	9.97637	0.957942	0.747771	1.34609	1.06249	1.50427	1.26541	1.08231
LHB	2.85594	0.756793	2.23983	1.13301	1.00088	0.866108	0.852484	2.35398	0.589201	2.18896	0.836502	1.0394	1.9011	1.66139	2.19663	2.41706	1.43873
LIF	0.93353	0.860746	1.54624	0.846558	0.793314	1.36013	1.05977	0.912564	0.776999	0.734401	1.60825	0.910519	0.989942	0.734366	0.866893	1.06763	0.752352
LIFR	0.544037	0.615632	0.766486	1.02001	1.17252	0.807466	0.700445	0.814244	0.565792	0.654671	0.855089	0.609405	0.624265	0.481027	0.627859	0.620995	0.495416
LIMK2	0.970975	0.609628	0.540803	0.990629	1.4165	0.592868	0.744447	0.680105	0.561459	2.46274	0.556479	0.603787	1.49899	1.27412	1.10056	1.86917	1.13535
LIMS1	0.569704	0.49784	0.887264	1.07149	1.10799	0.820526	0.681323	0.894308	0.530426	0.961942	0.997347	0.471609	0.995549	0.637326	1.03901	0.568764	0.574937
LIMS2	0.406932	0.595475	0.556237	0.862745	1.21042	0.926837	0.605734	0.732538	0.733273	0.637122	1.02353	0.546327	0.59691	0.322321	0.505136	0.360838	0.44325
LIPE	0.265951	0.62106	0.358518	0.865564	0.986189	1.14825	0.648365	0.277345	0.765914	0.260701	1.23889	0.438102	0.832016	0.862689	0.741938	0.211376	0.535205
LIPF	0.302059	0.700777	0.654214	0.605144	1.08403	1.31082	0.671646	0.375978	0.754805	0.541506	1.08691	0.554811	0.523809	0.442878	0.658984	0.278167	0.438066
LMNA	0.712688	0.882325	0.759827	0.772634	0.924701	1.30267	0.852977	0.836264	1.02747	0.856317	1.27701	0.822848	0.847327	0.781328	0.785317	0.636934	0.787003
LMNB1	0.823769	0.790974	0.629856	0.936425	1.18843	0.875148	1.03895	0.908425	0.722078	0.861876	0.424565	0.744325	1.19191	0.902291	0.97171	1.11716	1.05059
LMNB2	0.920039	0.737797	0.556468	0.708593	1.19504	1.09636	0.744747	0.870573	0.67061	0.883511	0.640735	0.689915	0.683159	0.862945	0.776548	1.14752	0.677112
LMTK2	0.348511	0.63114	0.562722	0.678164	1.0501	1.27173	0.671539	0.553639	0.655527	0.563877	0.980537	1.05196	0.600068	0.499608	0.524513	0.29701	0.427667
LMTK3	0.50406	0.512239	0.650904	0.220453	0.929782	1.84977	0.480204	0.548827	0.613483	0.57598	0.92835	1.74111	0.812262	0.564832	0.67828	0.516017	0.558707
LRP5	0.623971	0.791979	0.572635	0.744073	1.37129	0.884639	1.12078	0.76426	0.556164	0.605799	0.524242	0.750829	1.35602	1.05046	0.98161	0.726047	0.987629
LRP6	0.649117	0.550501	0.716279	0.907188	1.15469	0.938122	0.761973	1.11321	0.572512	0.974036	0.636881	1.04915	0.969282	0.660028	0.841772	0.767456	0.612174
LTA	1.57951	1.19731	1.02436	0.497381	1.16996	1.33266	1.54038	1.296	1.2221	1.11343	1.20229	1.81975	1.85983	1.71373	1.49082	1.45681	1.32817
LTBP1	0.663067	0.375726	0.87161	0.621929	1.27611	1.10196	0.719786	1.15625	0.149102	0.334411	0.413226	1.21736	1.9999	1.29292	2.17696	0.636875	0.782127
LTBP2	0.719217	0.629397	0.912912	0.441921	0.806115	1.75196	0.863057	1.07936	0.494585	0.84973	0.645126	1.39512	0.93917	0.490725	0.669635	0.802465	0.422145
LTBP3	1.6184	0.71984	1.01135	0.748847	1.20331	1.04784	0.837259	1.27056	0.379698	1.04557	0.295868	0.594018	1.94103	1.53902	1.72012	1.6493	1.67217
LTBP4	1.30256	0.950701	1.07588	0.575866	1.00306	1.42107	1.2002	1.46718	0.750994	1.05219	0.720176	1.14666	1.83961	1.62309	1.26925	1.30069	1.09767
MAML1	0.680301	1.5068	0.607753	0.708939	1.07411	1.21695	1.44101	0.778329	0.701207	2.03566	0.601072	0.990165	1.31367	1.089	1.15263	0.781965	0.986382
MAML2	0.316862	0.451579	0.513092	0.50784	0.948268	1.54389	0.739677	0.284136	0.232089	0.184682	1.03949	1.27383	0.596539	0.285966	0.478888	0.561032	0.00410612
MAML3	0.452375	0.520432	0.895102	0.536211	0.930292	1.5335	0.829153	0.531312	0.537095	0.311646	1.43382	1.40971	0.526074	0.287346	0.460152	0.460877	0.00536023
MAP1B	1.0242	0.895298	0.878572	0.925414	0.891147	1.18344	0.900557	0.824355	0.838099	0.790663	0.630581	0.572304	1.18553	1.2289	1.26988	1.21883	1.32658
MAP2	2.36381	1.15586	1.26916	1.27445	0.96311	0.762437	1.07815	1.71382	0.944214	1.84441	0.542893	0.627106	1.70884	1.89236	2.02298	1.98973	1.56189
MAP2K1	1.03322	1.18405	0.570662	1.27815	0.88259	0.839265	1.32105	0.634739	0.911371	0.677853	0.771171	0.687018	1.46655	1.29958	1.20665	2.45531	0.969624
MAP2K2	1.97114	0.711427	2.05477	1.81112	1.00196	0.186919	0.959481	2.10148	0.662353	3.55096	0.429417	0.397317	2.3459	1.26964	2.67491	1.7306	1.33345
MAP2K3	1.60423	1.17581	1.82355	1.19899	1.21658	0.58443	1.48189	2.11323	1.34591	2.57183	1.05623	0.8288	1.28259	0.978998	1.50406	1.32173	0.836144
MAP2K4	0.980598	1.40688	1.50506	1.18539	1.05692	0.757689	1.68838	1.2466	1.75823	1.52546	1.81586	1.17145	1.28649	1.42813	1.36316	0.810611	1.32649
MAP2K5	1.36567	0.929575	0.857261	1.3483	1.09779	0.55391	0.919733	1.33863	0.639527	1.53531	0.429453	0.577679	1.67289	1.35728	1.6721	1.52975	1.74102
MAP2K6	1.29923	0.558523	0.933813	1.35364	1.0789	0.567461	0.726816	1.20497	0.580792	2.02437	0.392487	0.429544	1.35411	1.14019	1.5356	0.876689	1.20827
MAP2K7	2.1902	0.836699	1.39344	1.24181	1.03994	0.718252	0.918757	2.025	0.815088	1.61552	0.494147	0.606257	1.19643	1.71693	1.43275	1.43075	1.3338
MAP3K1	0.38478	0.473497	0.518217	1.16976	1.2781	0.552145	0.403903	0.35519	0.508778	1.20633	0.676721	0.286076	0.302803	0.339511	0.412115	0.260154	0.304839
MAP3K10	0.506706	0.875857	0.686439	1.20185	1.17867	0.619483	0.89632	0.801203	1.18635	0.619099	0.81129	0.662724	0.921295	0.909881	1.18329	0.485109	0.72848
MAP3K11	0.653454	0.811739	0.763905	1.01597	1.36171	0.622315	0.803829	0.628822	1.27353	0.681795	1.32289	0.755575	0.692404	0.962695	0.822839	0.735769	0.749676
MAP3K12	0.687499	1.04033	1.116	1.10336	0.94283	0.953811	0.745128	1.22086	1.48112	0.639501	0.973428	0.815541	0.313969	0.364126	0.488077	0.786606	0.585622
MAP3K13	0.542746	0.749099	0.618656	1.16841	1.15161	0.679975	0.768875	0.697506	1.01292	0.654605	1.19469	0.697246	0.775943	1.16814	0.992657	0.599711	0.698639
MAP3K14	1.56187	0.850782	0.853257	1.0483	1.12355	0.828149	0.994814	1.72829	0.720704	0.914761	0.401025	0.591517	1.47137	1.45489	1.63025	1.07735	1.5473
MAP3K2	0.774253	0.683649	1.32144	0.985706	1.00728	1.00701	0.631131	0.911801	0.821646	1.16545	1.21093	0.621768	0.455477	0.729431	0.625729	0.876564	0.453948
MAP3K3	0.983653	0.787655	0.736335	0.891188	1.00219	1.10662	0.87425	1.03732	0.700575	0.98236	0.352231	0.591453	0.921662	0.83881	0.927377	1.60015	0.971413
MAP3K4	0.639426	0.737227	0.517978	0.842609	1.1521	1.00529	0.73725	0.513598	0.781544	0.848236	0.865399	0.818621	0.512603	0.672644	0.650525	1.15213	0.586288
MAP3K5	0.693968	0.562613	0.568977	0.787232	0.917237	1.29553	0.5979	0.60764	0.6678	0.936948	0.864051	0.932878	0.457046	0.597789	0.512572	0.755987	0.6556
MAP3K6	0.922252	0.943985	0.969025	0.822646	1.11705	1.06031	0.973232	0.975521	0.945634	1.67074	0.460247	0.625265	0.725412	0.721283	0.885419	0.965398	0.759819
MAP3K7	2.08208	1.05954	2.56396	0.841709	1.11146	1.04683	1.1398	2.17838	1.32616	2.67341	0.558688	0.867725	0.739555	1.01109	0.930434	2.25215	0.903704
MAP3K8	1.52188	0.428648	1.62377	1.04998	0.818516	1.13151	0.485075	1.45277	0.635088	1.58366	0.944702	0.794146	0.630401	0.934428	0.63791	1.51482	0.655078
MAP3K9	0.759308	0.595124	0.923794	1.0904	1.05996	0.849642	0.642958	0.777438	0.857807	0.823173	1.72112	1.16628	0.622266	0.606514	0.732074	0.886179	0.526469
MAP4K1	1.35217	0.617097	1.20804	1.76964	0.52331	0.707052	0.751418	1.61485	0.855293	1.08034	1.07172	0.975626	1.32575	1.45337	1.77055	1.15402	1.1307
MAP4K2	0.445842	0.45665	1.19225	1.18277	0.775432	1.0418	0.556308	0.832077	1.07691	0.672194	1.76072	0.861869	0.783072	0.812223	0.718478	0.587587	0.857546
MAP4K3	1.73591	0.552693	1.73494	1.10145	0.950479	0.948069	0.81581	1.87443	0.852182	1.70019	1.19035	0.965393	1.14246	0.832858	1.25141	1.67948	0.972089
MAP4K4	4.82292	0.976355	7.01526	1.06328	1.07993	0.85679	1.1408	5.53281	0.923451	3.51563	0.769486	1.01045	1.50106	1.1831	1.28151	6.63898	1.16428
MAP4K5	0.908393	0.618969	1.30463	1.04756	1.16834	0.784093	0.690798	1.01405	0.860993	1.99037	1.60549	1.06252	0.533728	0.633797	0.573508	1.0598	0.567838
MAPK1	1.83445	0.307548	1.23804	1.08879	0.809059	1.10215	0.470951	1.23329	0.406153	1.24808	1.16671	0.87848	1.27318	1.03689	1.22473	1.38593	0.848833
MAPK10	0.84228	0.630638	0.495313	1.06094	1.12203	0.817029	0.698523	0.732397	0.576712	0.574134	0.558681	0.624325	1.26164	1.10608	1.15561	0.952616	0.972829
MAPK11	0.76589	0.577551	0.549004	0.939943	1.1175	0.942562	0.597892	0.737104	0.614828	0.838658	0.770108	0.584741	0.469537	0.658768	0.425287	1.4148	0.448017
MAPK12	0.970966	0.641362	0.854759	1.25648	1.01629	0.727226	0.682212	0.778422	0.725159	0.754451	1.12261	0.719986	1.28652	1.23484	1.30246	0.792429	1.00204
MAPK13	0.537045	0.27852	0.818717	1.09276	1.01854	0.888706	0.374895	0.698562	0.494037	0.507539	1.22801	0.418315	0.510429	0.433829	0.467001	0.558118	0.421752
MAPK14	1.17167	0.651435	0.861642	1.09755	1.04185	0.860593	0.649911	0.880808	0.792532	0.802197	1.09212	0.595715	1.33141	1.4787	1.44384	0.685579	1.03531
MAPK3	1.44573	0.725023	0.96789	1.10682	1.03118	0.861997	0.75471	1.13123	0.913143	1.45985	0.962352	0.69926	1.07986	1.74241	1.0611	1.03073	1.20736
MAPK4	1.5684	1.41666	2.43938	0.810261	1.19517	0.994573	1.7111	1.85204	1.74296	2.63513	1.10614	1.54375	1.30699	1.40312	1.30348	1.81066	1.39937
MAPK6	0.471913	0.40431	0.754469	0.672471	0.966657	1.36087	0.443086	0.508041	0.654463	0.571786	1.15042	0.619677	0.357238	0.354502	0.349716	0.450954	0.364163
MAPK7	0.714412	0.560695	0.652574	1.00876	1.0087	0.98254	0.62506	0.89205	0.6806	0.865261	0.715691	0.747116	1.07541	0.857549	0.992299	0.621629	0.639587
MAPK8	1.92571	1.32482	2.22436	0.903575	1.26426	0.832167	1.60672	2.01778	1.13563	1.96178	0.54483	1.30898	1.68811	1.41529	1.62617	2.03223	1.79321
MAPK8IP1	1.63891	1.11175	1.19293	0.937183	1.22077	0.842042	1.33763	1.41897	0.646657	1.66631	0.307108	0.810902	1.98723	1.41388	1.90728	1.34556	1.87268
MAPK8IP2	1.35196	0.727195	1.1405	0.613468	1.21037	1.17616	0.831406	1.17404	0.861043	0.983908	0.998675	1.20156	1.50049	1.42989	1.25039	0.99332	1.34539
MAPK8IP3	0.722349	0.836546	0.944853	0.674253	0.979632	1.34611	0.912486	0.75368	1.0524	0.71157	1.47129	1.86173	1.49934	1.25928	1.35188	0.695493	1.25804
MAPK9	0.382226	0.76526	0.573724	0.684438	1.06591	1.24966	0.885138	0.444995	0.918901	0.578217	1.03876	1.65773	0.904479	0.854394	0.69337	0.356985	0.781763
MAPKAPK2	1.35715	1.51601	1.92732	0.857597	1.27866	0.863743	1.80591	1.56535	1.45079	2.09311	0.80368	1.64408	1.69264	1.18367	1.33376	1.75507	1.47563
MAPKAPK3	1.14267	0.875912	1.10478	0.879424	1.10179	1.01879	0.982339	1.14473	0.947242	1.06452	0.997392	1.41746	1.24647	1.83793	1.40673	1.10282	1.1397
MAPKAPK5	1.12928	1.39632	1.50211	0.909048	1.20987	0.881084	1.68827	1.31823	1.06647	1.76503	0.493247	1.32418	1.65036	1.11242	1.40783	1.74989	1.34451
MAPT	0.45342	1.05359	0.633487	0.404675	1.15051	1.44481	1.33665	0.472015	1.14798	0.514899	1.38062	1.98161	1.40082	1.05044	1.14168	0.501319	0.898706
MCF2L	0.526702	0.778938	0.841414	0.503066	0.853602	1.64333	1.16216	0.579618	1.01409	0.731275	1.33555	2.039	0.99618	0.846636	0.73899	0.562013	0.675651
MCM5	1.31211	1.04674	1.85928	0.753487	1.03285	1.21367	1.20695	1.54756	0.598398	1.56497	0.333599	0.68358	1.22429	1.10912	1.1363	1.87178	1.13705
MDK	1.50998	0.829924	0.892103	0.632671	0.862527	1.5048	0.981373	1.14229	0.861304	0.98575	1.18154	1.35744	1.76621	1.63718	1.55343	1.05848	0.893957
MDM2	2.27127	0.549625	3.44239	0.604973	1.60682	0.788204	1.12126	2.09924	0.0973264	2.18436	0.0571284	0.0399145	0.869232	0.922095	0.941002	1.76647	1.03098
MED1	0.569755	0.647399	0.576749	1.01247	1.1733	0.814236	0.724459	0.6379	0.604417	0.700134	0.542465	0.398823	0.875112	0.717849	0.990994	0.510978	0.662534
MEF2A	1.54568	0.832939	1.3138	0.769994	1.14587	1.08414	0.933818	1.31726	0.832371	1.81853	0.436386	0.579151	0.750242	0.879026	0.870349	1.46744	0.857089
MEF2B	0.928712	1.06652	0.928301	1.05179	0.943158	1.00505	1.03105	0.959276	1.07551	0.461765	0.374805	0.947649	1.42902	1.15009	1.43851	1.76986	1.80275
MEF2C	1.44818	0.885402	1.88703	1.12105	1.20244	0.676515	0.939064	1.3561	1.18457	1.63571	1.38714	0.796803	0.701068	0.978418	0.860596	1.43549	0.925743
MEF2D	2.34476	0.977141	1.74517	1.07263	1.03626	0.891108	1.19644	2.49384	1.25861	3.00165	0.920276	0.684676	1.6455	0.926968	1.5364	1.73599	1.15042
MEP1B	1.23891	0.865562	1.23131	1.55025	0.861387	0.588363	1.09144	1.70659	1.10981	1.36733	0.952062	0.762375	1.23212	1.22574	1.50881	1.12118	1.04906
MEPE	0.379958	0.919363	0.69948	1.09332	1.10562	0.801055	1.00838	0.416137	1.12465	0.641696	1.26208	0.779145	0.675459	0.843106	0.655249	0.373693	0.760456
MERTK	1.29479	1.23822	1.48047	0.931672	1.1279	0.94043	1.30925	1.25092	0.920468	1.50624	0.464695	0.878943	1.0611	0.852823	1.02245	1.60192	1.14289
MET	1.14152	0.87695	1.4358	1.09446	1.05509	0.850448	1.07546	1.17138	1.18558	1.1127	1.02407	0.934621	1.10823	1.45002	1.16285	1.36039	1.15495
MFNG	0.936914	0.990919	1.09453	1.32328	1.30054	0.376179	0.907911	1.49731	1.13648	0.969509	0.953389	0.618654	0.656237	0.721635	0.735107	0.927559	0.517399
MITF	2.0544	2.3527	3.15819	0.977386	1.21515	0.80746	2.41134	2.32333	2.76825	2.3522	1.67037	2.31108	1.21305	1.17708	1.51629	2.46774	1.617
MKNK1	1.36343	0.652905	0.844361	1.23756	1.34677	0.415675	0.680918	1.03635	0.6718	1.06358	0.403623	0.512869	1.55285	1.05542	2.05773	0.937191	1.45661
MKNK2	1.81303	0.796708	0.97846	1.40877	1.05527	0.535963	0.790961	1.09666	0.955149	1.43875	0.810062	0.761635	1.58246	1.7028	1.51217	1.31807	1.81731
MLH1	1.04052	0.856401	1.01169	1.16028	1.10563	0.734084	0.967775	1.03148	1.02062	0.794539	0.869289	0.745092	1.47559	1.65524	1.63294	0.789048	1.17188
MLLT4	0.540722	0.785581	0.525837	1.19546	1.23194	0.572594	0.718757	0.635511	0.883493	0.552733	1.06962	0.607169	0.64731	1.00472	0.997274	0.819488	0.59794
MLST8	0.502339	0.89896	0.477961	1.06176	0.798565	1.13968	0.839421	0.402948	1.13232	0.497435	1.29942	1.00483	0.841923	0.97307	0.818523	0.48493	1.01919
MMP1	1.51279	0.55154	1.78273	1.49335	0.921125	0.585524	0.576792	1.389	0.596266	3.0266	0.555824	0.516132	1.34625	1.41915	2.83257	0.855352	1.75445
MMP10	0.323619	0.800683	0.495918	0.964672	1.06412	0.971206	0.800227	0.404965	0.903246	0.557857	1.38906	0.859126	0.645233	0.650007	0.762429	0.404134	0.630917
MMP12	0.169718	0.499995	0.592457	0.734627	1.23732	1.02806	0.53002	0.336612	0.651036	0.497489	1.17284	0.898587	0.243523	0.29881	0.445932	0.273896	0.493381
MMP13	0.529691	0.587852	0.764278	0.695255	1.28301	1.02173	0.682113	0.550486	0.721521	0.657186	0.908829	0.93656	0.42917	0.524777	0.576559	0.621491	0.46773
MMP14	1.55654	1.27074	2.14609	0.935144	1.1172	0.94766	1.33411	1.79214	1.66501	2.23399	0.705623	1.29521	0.981726	1.06534	1.22059	1.59423	1.16162
MMP15	2.00601	1.08558	0.849216	0.919928	1.08438	0.995695	1.11405	1.11059	1.32066	1.37788	1.40601	1.34609	0.969309	1.31614	1.05272	1.0822	1.17692
MMP16	0.753501	0.728809	0.776669	1.02575	1.232	0.742252	0.748747	0.606205	0.921005	0.773654	1.90046	1.14053	0.514873	0.549852	0.647786	0.617583	0.58228
MMP2	1.26758	0.710549	0.759227	1.10206	1.01924	0.878692	0.837985	1.13926	0.622021	1.50034	0.519599	0.504888	0.906719	0.993408	1.0062	0.964505	0.812372
MMP3	0.441417	0.671967	0.380644	0.792207	1.0597	1.1481	0.815399	0.298397	0.979176	0.337164	1.32421	0.851343	0.484459	0.641942	0.498085	0.31935	0.508952
MMP7	1.04252	0.366536	0.979384	1.19335	1.07136	0.73529	0.503086	1.63838	0.514113	1.095	0.683121	0.424764	0.980374	0.714046	1.33449	1.08381	1.07906
MMP9	0.587122	0.68206	0.486315	0.756065	0.7419	1.50203	0.821992	0.403804	1.17022	0.480543	1.30722	1.43473	0.895027	1.10369	0.729962	0.471967	0.976534
MMRN2	0.683004	0.395295	0.646914	1.19732	1.13544	0.667246	0.600003	0.852984	0.47852	1.01091	0.437212	0.605947	1.3456	0.75834	1.40578	0.633807	0.620624
MRAS	1.1589	0.554061	1.35704	0.841355	1.06528	1.09337	0.926775	1.00989	0.839126	0.750144	0.93538	1.49097	2.22028	1.79407	2.60515	0.941993	1.74451
MRGPRF	1.5894	0.615118	0.982041	0.8686	1.00324	1.12816	1.09495	1.20857	0.792761	0.683074	1.0137	1.6209	2.45617	2.29274	1.79889	1.82426	1.33404
MS4A1	0.438253	0.910337	0.946762	0.654944	1.10065	1.2444	1.33271	0.686792	1.23791	0.719973	1.7175	2.01667	0.86883	0.956294	0.580338	0.500632	0.664384
MSH2	1.61588	0.819873	1.121	0.654951	1.06531	1.27974	1.2575	1.36675	1.14567	1.30019	1.37842	1.99495	1.5657	1.5593	1.34654	1.60013	1.17717
MSH6	1.22248	0.702553	1.48113	0.420717	0.894343	1.68494	1.13087	1.15596	1.17732	1.11135	1.62636	2.46789	1.18763	0.844224	0.667182	1.03697	0.79534
MST1R	0.859063	0.945554	0.906611	0.541526	1.02216	1.43631	1.39646	0.802409	1.19693	0.615688	1.46925	2.35418	1.64976	1.36802	1.2677	0.802272	1.20926
MTOR	0.67329	0.731534	1.12848	0.260738	0.767131	1.97213	1.55638	0.728467	1.51507	0.626028	2.07184	3.13101	1.27113	0.830985	0.52513	0.788252	0.76934
MUC1	1.0327	0.584306	1.33538	0.765302	0.97193	1.26277	1.11968	1.47286	1.0578	0.879796	1.36409	2.09273	1.18639	1.07479	0.940752	1.04993	0.81622
MUSK	0.784593	0.613914	0.955391	0.649858	0.932982	1.41716	1.17547	0.69361	1.0929	0.70889	1.62029	1.93426	0.807672	0.751824	0.455972	0.741512	0.296808
MYC	0.436169	1.08358	0.440983	0.79894	1.04789	1.15317	0.908745	0.622934	0.705064	0.358059	0.602876	0.721096	0.632118	0.782747	0.442943	1.37194	0.322998
MYD88	1.23731	0.409878	1.69676	0.740636	0.528517	1.73085	0.992568	2.11338	0.858799	1.25201	1.3226	1.71542	0.808799	0.626139	0.491799	1.76004	0.0060228
MYH10	0.9369	0.546083	0.936876	0.808339	1.1151	1.07656	0.599091	1.20682	0.507119	0.846036	0.528417	0.290159	0.577975	0.645506	0.739996	1.13748	0.443589
MYH11	1.11397	1.33481	1.61865	0.735004	1.33163	0.933361	1.2798	1.37735	1.56659	1.58656	1.0799	1.23517	0.778885	0.735411	0.821751	1.49051	0.997226
MYH13	0.402274	0.651258	0.59326	0.944504	1.24262	0.812878	0.781392	0.329544	1.05651	0.609717	0.912014	0.601676	0.629085	0.957583	0.739039	0.387096	0.649499
MYH14	1.45282	0.67627	1.0995	0.998173	1.18065	0.821173	0.816099	1.38008	0.852065	0.998689	0.695491	0.548823	1.34321	1.51564	1.29674	1.17728	0.987955
MYH15	0.59905	0.796051	0.539888	0.946985	1.26232	0.790698	0.834826	0.569007	1.10377	0.753145	0.943784	0.644101	0.76084	0.995679	0.827645	0.511079	0.725953
MYH16	1.77173	0.523788	1.21739	1.3427	1.12663	0.53067	0.645126	1.40296	0.793385	2.94242	0.528151	0.549124	1.16867	1.41049	1.23552	1.16809	1.16096
MYH2	0.707141	0.577013	1.03752	1.0588	1.168	0.773206	0.821506	0.736613	1.05007	1.03008	1.2591	0.535132	0.718397	0.954498	0.701863	0.633144	0.749772
MYH3	2.83692	1.0478	1.89596	1.13832	0.978743	0.882932	1.28545	1.85281	1.53228	2.11121	1.2782	1.10012	1.54445	1.60869	1.62614	1.9008	1.4905
MYH4	0.40957	0.981108	0.578192	0.950423	1.18466	0.864918	1.05659	0.428875	1.04292	0.537075	1.01454	0.74705	0.686747	0.852847	0.83083	0.623699	0.680434
MYH6	0.606813	0.629518	0.517017	1.07741	1.1198	0.802791	0.87481	0.448596	0.83432	0.633236	0.752303	0.557406	1.00294	0.846621	0.936221	0.657301	0.80108
MYH7	0.826786	1.0663	1.06903	1.04759	1.29653	0.655879	1.10829	0.852629	1.31413	0.791636	1.23597	0.955221	1.199	1.15054	1.2962	0.716888	1.11799
MYH7B	0.889953	0.997045	1.13414	0.929166	1.2191	0.851732	0.930249	0.819243	1.35275	1.51971	1.14599	1.02383	0.698145	1.06723	0.888962	0.984287	0.869086
MYH8	1.07841	1.80241	2.12159	0.940072	1.13528	0.924649	1.84944	1.56173	2.30015	1.1245	1.37983	1.92891	1.32814	1.11185	1.56459	1.67617	1.5818
MYH9	0.760363	0.343273	0.758197	1.0822	1.1007	0.817098	0.582984	0.819162	0.698023	1.027	0.709654	0.509999	0.708354	0.807806	0.799513	0.654126	0.734331
MYL1	1.69385	1.09312	1.59057	0.921336	1.1169	0.961764	1.08277	1.53406	0.84085	2.45294	0.338512	0.59826	1.03355	1.09898	1.2141	1.44758	1.17424
MYL12A	1.20915	0.557573	0.810474	1.18319	1.03884	0.777969	0.644071	1.20846	0.575731	1.40451	0.689916	0.461392	1.2873	1.22453	1.10002	1.01169	0.92434
MYL12B	0.849579	0.883857	0.48169	1.18781	1.06144	0.750758	1.03755	0.70684	0.670549	0.537298	0.524985	0.601942	1.7767	1.43847	1.66735	1.44628	1.25369
MYL2	1.34153	0.658176	0.726426	1.06822	0.962607	0.969178	0.737854	0.873465	0.956428	0.819238	1.0343	0.855595	1.24587	1.4963	1.96957	0.963432	1.55268
MYL3	1.18483	0.66697	1.07104	1.07103	0.992368	0.936605	0.681549	1.1128	0.981288	0.846228	1.68579	0.915579	0.950458	1.13029	1.01566	0.881349	0.929178
MYL4	0.616476	0.625547	0.638291	1.00142	1.16238	0.836197	0.785678	0.784597	0.773915	0.69861	1.09596	0.757325	0.893692	0.860446	0.969169	0.873767	0.784538
MYL5	1.07121	0.527917	0.666904	1.22473	0.953467	0.821808	0.61451	1.27293	0.739829	1.21074	1.00611	0.730493	0.571628	0.763734	0.802404	0.905075	0.776403
MYL6	1.60324	0.754984	0.970505	1.43228	0.88045	0.687274	0.871972	1.45047	1.03021	1.10483	1.35421	1.12685	1.33307	1.79457	1.67959	1.24269	1.52972
MYL7	0.469037	0.563606	1.14985	0.844836	1.04139	1.11377	0.68767	0.680841	0.90665	0.582946	1.85282	1.12688	0.389586	0.571718	0.565713	0.70035	0.505376
MYL9	1.67291	1.32608	1.73232	1.16991	1.11943	0.710653	1.40134	1.95749	1.25063	2.25158	0.549271	1.24783	1.48095	1.19391	1.60914	2.25432	1.45221
MYLK	0.387356	0.708184	0.850725	1.50986	1.0207	0.469433	0.828107	0.821104	0.90399	0.526184	1.19781	0.771226	0.838086	0.586523	0.885618	0.422824	0.623175
MYLPF	0.765209	0.665886	0.794146	1.11296	1.08936	0.797675	0.725685	1.06243	0.9367	1.03935	1.32478	0.916801	0.682133	0.723063	0.821431	0.895503	0.683908
MYO10	1.00142	0.600681	0.611843	0.88978	1.1884	0.921819	0.734091	0.725848	0.77808	0.488618	0.746264	0.630176	0.579304	0.779604	0.57829	2.85334	0.474673
MYO15A	0.633869	0.464843	0.687159	1.40755	1.05112	0.541327	0.485869	0.799202	0.518375	1.26792	0.519203	0.421018	0.951897	0.672409	1.20529	0.609933	0.513516
MYO18B	0.729862	0.36674	0.76298	0.953518	1.15136	0.895118	0.439331	0.603264	0.672083	0.617218	1.74298	0.827437	0.464676	0.511416	0.612071	0.847851	0.511003
MYO1A	1.06842	1.02518	0.918057	1.06079	0.996225	0.942982	0.953403	0.894099	1.25358	0.724748	2.04985	1.24488	1.14657	1.19908	1.1609	1.06276	1.15509
MYO1B	1.06326	0.845809	1.14903	1.29764	1.10217	0.600184	0.911827	1.26161	0.997676	0.712718	1.32516	0.978273	1.58274	0.962388	1.8965	1.04577	1.04029
MYO1C	0.673579	0.655519	2.7034	0.905524	1.36724	0.727234	0.717832	0.896085	0.71721	0.541384	1.05355	0.692813	1.14595	0.774865	1.10517	1.56352	0.850505
MYO1D	0.645987	0.385161	0.803643	1.26875	0.952377	0.778877	0.421891	0.76983	0.484382	0.581058	0.941868	0.497272	0.934749	0.942404	1.20703	0.592342	0.724595
MYO1E	1.47299	0.670612	1.9511	1.12907	0.933143	0.937786	0.73643	1.82881	0.866038	1.24547	1.33415	0.778857	0.612415	0.568371	0.504087	1.37386	0.475953
MYO1F	1.08626	0.711478	1.57141	0.958671	0.809978	1.23135	0.669647	1.15252	0.882599	1.08955	1.80706	0.811646	0.60993	0.508049	0.489371	1.3215	0.601408
MYO1G	0.550135	0.793675	0.680699	0.862802	1.24207	0.895132	0.759394	0.567251	0.868948	0.5651	1.14362	0.765266	0.673694	0.784107	0.657358	1.00682	0.779395
MYO3A	0.571803	0.781396	0.576181	0.771891	0.974129	1.25398	0.847848	0.490574	0.985936	0.538823	1.36743	0.875768	0.768115	0.735098	0.664825	0.624372	0.821732
MYO3B	0.903718	0.53229	1.24698	0.774777	0.983396	1.24183	0.525748	0.913859	0.738948	1.06557	1.23505	0.602733	0.594129	0.499512	0.47119	1.06713	0.589674
MYO5A	0.807352	1.29444	0.752824	1.16096	1.25556	0.583478	1.28019	0.982626	1.28045	0.966616	0.659752	1.07476	1.44363	1.42794	1.19111	1.20916	1.26784
MYO6	0.515756	0.836451	0.668521	0.935678	1.00249	1.06183	0.786386	0.476835	1.1861	0.91685	1.34014	1.00605	0.680917	0.790729	0.831231	0.437136	0.740657
MYO7A	0.719044	0.612583	0.679227	0.744063	1.04725	1.20869	0.663567	0.745484	0.802955	0.444248	1.05142	1.03786	1.15862	0.970643	1.09791	0.474757	0.91164
MYO9A	0.611502	0.608338	0.625981	0.890365	1.033	1.07663	0.629174	0.794349	0.809874	0.67606	0.967342	1.17932	0.961746	0.772411	0.873029	0.44024	0.701914
MYO9B	0.556532	0.904021	0.739412	0.724015	1.11448	1.16151	0.963091	0.517567	1.05344	0.665451	1.20751	1.54476	1.0285	0.876964	0.817405	0.610754	0.81415
NACA	1.3382	0.732047	0.823662	1.10165	0.914095	0.984257	0.814515	1.61395	0.897965	2.96126	1.11061	1.43084	0.929641	0.860951	0.999904	0.561821	1.1604
NCAN	1.15739	0.412291	2.38363	0.00759772	0.547181	2.44522	1.19317	1.86715	0.778248	1.60953	1.48039	4.00099	1.35545	0.55071	0.145685	2.16381	0.642755
NCK1	0.572208	0.505446	0.847321	0.540778	0.943627	1.51559	0.751459	0.630289	0.69094	0.739405	1.23071	2.21715	0.971912	0.402141	0.455216	0.650578	0.428529
NCK2	1.33092	1.23967	1.38237	0.859394	1.34431	0.796298	1.34112	1.30474	0.798008	1.16488	0.56204	0.931956	1.39917	1.16581	1.07043	2.53447	1.15763
NCOA1	1.7631	1.43425	2.33436	0.865279	1.24122	0.893498	1.60504	1.95707	1.04474	1.95358	0.507217	1.13354	1.96871	1.51094	1.56398	2.09325	1.66664
NCOA2	0.960985	1.18605	0.625959	0.61669	1.12928	1.25403	1.36256	0.589153	1.09093	0.768927	1.18809	1.52442	1.63262	1.36681	1.29152	0.77251	0.935481
NCOA3	1.64515	1.58002	2.72633	0.00546467	0.961379	2.03316	1.40394	2.0174	1.3491	1.70381	1.71916	3.02237	1.26671	0.438084	0.564683	1.7995	0.238385
NCOA7	1.29083	1.26186	1.02492	0.324488	0.961661	1.71385	1.20494	0.978952	1.29004	1.47922	2.09606	2.9441	1.2365	0.702794	0.687601	1.12342	0.112814
NCOR1	0.693164	1.36684	0.799843	0.235811	1.11297	1.65122	1.71864	0.764161	1.89575	0.828299	2.54421	3.25409	1.50916	0.833933	0.950456	0.697658	0.628187
NCOR2	0.893893	0.417605	0.630968	1.02049	0.741057	1.23845	0.476458	0.939539	0.431679	1.69626	0.476336	0.716187	0.688777	0.612015	0.943572	0.836825	0.335173
NCSTN	1.21657	0.97099	1.43899	0.69407	0.903646	1.40228	0.845272	1.44847	1.1911	0.956897	1.53423	1.265	1.4861	1.6012	1.81872	1.12978	0.727269
NEDD8	1.59847	0.521891	1.58808	1.32877	1.0254	0.645828	0.64925	1.78641	0.486653	1.09678	0.0502166	0.0696642	2.05504	1.6039	2.46477	1.32226	1.3183
NET1	1.21013	0.661922	1.08869	1.00528	1.07288	0.921843	0.756682	1.15632	0.868908	1.06217	0.633527	0.510837	0.952357	0.755911	1.01178	1.17683	0.717066
NFAT5	2.72458	1.14219	3.34601	0.891775	1.16395	0.944279	1.29491	2.77256	1.15103	3.35639	0.438629	0.75711	1.03174	1.10042	1.16947	3.16554	1.20657
NFATC1	1.63253	0.730002	1.94235	1.15314	0.962001	0.884857	0.790439	1.66474	0.951432	2.66278	0.762303	0.574036	0.978384	1.13322	1.63198	1.32429	0.948011
NFATC2	1.22741	1.55242	1.89447	0.883025	1.39259	0.724385	1.53633	1.46462	1.92446	1.10403	0.728882	1.57815	1.17598	1.04131	1.30285	1.60822	1.4539
NFATC3	4.04124	1.15943	5.41595	0.958601	1.26538	0.776019	1.21058	3.68749	1.10403	4.0218	0.454442	0.755839	1.30569	1.35244	1.49041	4.69032	1.41444
NFATC4	1.34152	0.899106	0.859142	0.878821	1.34756	0.773614	0.865264	1.01384	0.573449	1.23169	0.302717	0.447782	0.989729	1.03883	1.12665	1.52096	1.18169
NFE2L1	1.26116	0.664123	0.757125	1.0112	1.50792	0.480875	0.769394	0.882802	0.540116	1.22055	0.370377	0.403691	1.32233	1.08697	1.34069	0.834495	1.20871
NFE2L2	0.764116	0.625573	0.577355	1.19563	1.21836	0.58601	0.650007	0.749888	0.860829	1.45666	0.706811	0.482729	0.797422	0.920356	0.894777	0.709913	0.895495
NFKB1	0.638325	1.04054	1.01105	1.13492	1.43674	0.428332	0.667269	0.640618	1.27451	0.797777	1.65059	0.531744	0.448129	0.70054	0.730569	0.558507	0.544762
NFKB2	2.08903	0.825107	1.4277	1.32306	0.869053	0.807888	0.904171	1.85334	0.933656	1.49602	0.607686	0.604587	1.2811	1.73231	1.52019	1.91191	1.23266
NFKBIA	0.803845	0.777892	0.72427	1.17576	1.15149	0.672756	0.747207	0.810708	1.03264	0.689957	1.02462	0.679777	0.975294	0.917945	1.27596	0.600919	0.962755
NFKBIB	0.686619	0.860017	0.684255	1.20656	1.17301	0.620425	0.96237	0.937489	0.951778	0.726931	0.71304	0.679399	1.19065	0.741796	1.4278	0.562769	0.936884
NFKBIE	0.516024	0.826256	0.474863	0.768178	1.36619	0.865632	0.836987	0.706425	1.27519	0.497235	0.641598	0.837972	0.752928	0.781993	0.858462	1.42468	0.559501
NGF	0.793374	0.960424	0.785375	0.909005	1.07591	1.01508	1.02334	0.647457	1.06575	0.602666	1.07398	0.808398	0.949508	0.937805	0.903251	1.11921	0.985967
NGFR	0.634934	0.648451	0.706355	1.47149	0.842881	0.685628	0.502154	1.01332	0.794139	0.652451	0.974791	0.403066	0.720868	0.35928	0.710434	0.616815	0.498534
NOS3	0.512213	0.787739	0.329697	0.920958	1.06118	1.01787	0.706174	0.308311	0.98854	0.287948	1.34331	0.711284	0.878559	0.769678	0.887342	0.442362	0.963875
NOTCH1	0.476731	1.13105	0.740753	0.819537	0.914689	1.26577	1.02168	0.469229	1.60496	0.56641	2.35994	1.22431	0.70022	0.790294	0.760478	0.52705	0.949392
NOTCH2	0.573337	0.912299	0.791329	0.864094	0.994485	1.14142	0.854823	0.568857	1.20329	0.703447	1.8953	0.988489	0.649226	0.828967	0.69273	0.535418	0.879201
NOTCH3	0.770005	0.985051	1.08113	1.0429	1.15516	0.801942	1.01219	0.7695	1.21378	0.974546	2.00605	1.12359	0.830699	0.926051	0.735022	0.91906	0.945735
NOTCH4	1.00191	1.38903	1.45461	0.917892	1.17522	0.906887	1.26214	1.08117	1.60267	1.76963	2.41623	1.43683	0.724913	0.931259	0.72192	1.22697	0.862043
NPTN	0.709819	0.760927	0.579969	1.14098	1.19073	0.668294	0.777563	0.681618	0.744528	0.76473	0.916812	0.731931	0.605148	0.735016	0.596284	0.89154	0.518202
NR0B1	0.96747	1.26267	1.94809	0.888473	1.26075	0.850782	1.27694	1.63113	1.49779	0.756463	0.375882	1.10614	0.936523	0.739614	0.93078	1.48897	0.739665
NR2F1	1.40227	0.480443	0.785713	1.11479	1.04691	0.838307	0.59854	0.985548	0.441768	2.64624	0.359856	0.346286	0.865305	0.967741	0.962331	0.968343	0.905695
NR3C1	0.95767	0.987002	0.822701	1.06792	0.984027	0.948056	0.845847	0.771076	1.2259	0.99096	1.79461	1.16446	1.17536	1.15025	1.31387	0.815874	1.20492
NRAS	1.42714	0.839075	2.71253	1.16995	0.898292	0.931759	0.633539	2.03184	1.15729	2.25298	2.02146	1.10528	0.809414	0.672077	0.994828	1.57385	0.739777
NRG1	1.19453	0.851664	1.36221	0.922393	1.20142	0.876186	0.963704	1.41987	0.871283	1.0189	0.769598	0.741765	0.566289	0.831674	0.632038	2.65946	0.529691
NRG2	0.887424	0.769828	0.938235	0.934741	1.13799	0.927265	0.821641	1.30769	0.691933	0.962561	0.467582	0.615289	0.722626	0.674096	0.687557	1.32879	0.720212
NRG4	0.912926	0.532383	0.66848	1.03836	1.11713	0.844501	0.593201	0.824256	0.552347	0.958424	0.548529	0.44961	0.872904	1.06295	0.963183	1.11222	0.740134
NRIP1	1.28853	0.574759	1.78671	0.787686	0.845715	1.3666	0.339749	1.26669	0.788208	1.09088	1.54685	0.655309	0.54534	0.511512	0.617397	1.7211	0.563053
NRP1	1.3067	0.619306	1.30844	1.13668	0.990102	0.873215	0.582963	1.42501	0.731973	1.33674	0.795907	0.550654	1.00161	0.801673	0.965121	1.1361	0.532819
NRP2	1.19908	1.53377	2.39818	0.910207	1.24903	0.840763	1.71201	1.67765	1.76369	1.30591	0.890643	1.50706	1.28077	1.23759	1.28108	1.72487	1.44567
NTF3	0.817878	0.582458	0.918422	1.06938	1.14069	0.789933	0.616544	0.998033	0.717368	0.844815	0.796837	0.601804	0.745047	0.710802	0.842091	0.812016	0.547006
NTF4	0.82367	0.786838	0.880129	0.870035	1.10566	1.02431	0.73671	0.768183	0.911241	0.593629	1.043	0.821759	0.873014	0.877424	0.903103	0.87982	0.787565
NTN1	1.08347	1.40319	1.65168	0.989257	1.22298	0.787767	1.70427	1.25567	1.67488	1.6529	0.973572	1.49587	1.78417	1.62177	1.36182	1.45994	1.47047
NTRK1	1.44537	0.87084	1.02442	0.986129	1.13618	0.877691	1.21107	1.1325	0.825295	1.05632	0.554385	0.952503	1.3498	1.30799	1.06961	1.35914	1.24459
NTRK2	1.414	1.25391	1.79029	0.925779	1.33714	0.73708	1.53296	1.40751	1.12282	2.02372	0.540196	1.20233	1.58154	1.13322	1.36417	1.54684	1.37139
NTRK3	1.08454	0.631097	1.00628	0.941144	0.9953	1.06356	0.607959	1.00387	0.748327	0.895835	0.865838	1.2924	1.24098	1.49321	1.20392	0.856472	1.01744
NUDT6	1.21882	0.535712	0.877531	1.0936	1.07229	0.834112	0.59905	0.99541	0.696343	1.01776	0.664246	1.06716	1.2404	1.36857	1.46084	0.823331	1.14297
OGFR	0.704141	0.953506	0.756927	0.891787	1.06921	1.039	1.07622	0.574668	1.07805	0.50129	1.14269	1.73338	1.70611	1.49707	1.38931	0.544977	1.20974
OGN	0.424839	0.48735	0.966828	0.73453	0.84015	1.42532	0.19115	0.544929	0.538679	0.448142	1.1666	1.72508	0.407332	0.322729	0.220883	0.385462	0.0721239
OSM	1.83718	1.13413	1.58953	0.785171	0.983286	1.23154	1.12293	1.57428	1.23647	1.40093	1.19817	2.26467	1.76091	1.74982	1.46554	1.5788	1.3917
OSMR	1.43569	0.515306	2.28477	0.892412	0.532405	1.57518	0.270639	1.56853	0.545374	2.08902	1.04966	2.02099	0.803548	0.322262	0.277213	1.59394	0.372137
PAK1	2.34008	0.520933	2.6004	1.21876	0.938213	0.843028	0.676128	2.26581	0.548889	3.12804	0.564112	1.01261	1.69061	1.51563	1.94533	1.73455	1.22358
PAK1IP1	1.32335	0.897405	1.17028	0.615555	0.958806	1.42564	1.05749	1.29065	0.976904	1.12498	1.08476	1.85818	1.31204	1.28034	1.30248	1.23098	1.05588
PAK2	0.406293	1.37999	0.625546	0.604371	1.0233	1.37233	1.23125	0.408918	1.44683	0.594304	1.50392	2.0037	0.989831	1.07674	0.921057	0.556601	0.954148
PAK3	1.58564	1.10503	2.12636	0.732354	1.05773	1.20991	1.19932	1.69393	0.455345	1.72821	0.297563	0.570744	1.29277	1.01425	1.06277	1.99587	0.98007
PAK4	0.801402	1.45029	1.39603	0.497425	1.27368	1.22889	1.08706	1.01483	1.56889	0.729116	1.94221	1.8422	0.923183	1.10704	0.831592	1.20181	0.516856
PAK6	0.985387	1.72054	1.3164	0.374055	1.09217	1.53377	1.25218	0.837558	1.97163	0.986719	2.23568	2.32083	1.12449	0.994283	1.00729	1.44921	0.517116
PAK7	1.31767	1.57003	2.23953	0.40041	1.1829	1.41669	1.05931	1.37926	1.7533	1.27541	2.08226	2.40953	1.04801	0.736181	0.805786	2.1816	0.27596
PAN2	1.12898	1.21202	1.45991	0.400142	1.09708	1.50278	1.0246	1.20929	1.45944	1.12616	1.81919	1.93563	1.00779	0.91337	0.994817	1.40001	0.457575
PARP1	1.12737	0.202726	2.26275	1.15936	1.07648	0.764156	0.0963122	1.52434	0.450317	1.59397	0.778193	0.0162512	0.408399	0.626372	1.16943	1.05684	0.36613
PARP10	1.36657	0.752825	1.47428	1.01378	0.87657	1.10965	0.837425	1.15676	1.30585	1.51427	0.917951	0.629441	1.10568	1.16226	1.05137	1.11616	1.15288
PARP11	1.00419	0.999209	1.50179	0.999473	1.19169	0.80884	0.959675	0.962285	1.2602	1.43788	1.61279	0.796914	0.964525	0.943493	0.894668	1.02632	0.991131
PARP14	0.889866	0.968057	1.51157	0.934579	1.12793	0.937488	0.957713	1.1219	1.30736	1.03941	0.786079	0.43008	1.16663	0.795991	1.42081	0.779414	0.910137
PARP15	0.779227	0.686713	1.31999	1.01038	1.42455	0.56507	0.700907	0.925333	1.02273	0.789476	0.760229	0.344017	0.471302	0.671542	0.70141	0.563748	0.492717
PARP16	0.458992	1.15803	0.649428	1.01895	1.29817	0.682887	1.1181	0.457421	1.27408	0.666967	1.21308	0.879417	1.05124	1.04389	1.06005	0.473286	0.984256
PARP3	0.973265	0.674752	1.16502	0.944983	1.37967	0.675344	0.64366	0.852275	0.885862	1.17969	0.821733	0.452085	0.549429	0.676571	0.6119	0.963299	0.683102
PARP4	0.947777	1.24165	0.755872	0.917501	1.2848	0.797696	1.17854	0.977246	1.19863	0.502865	0.743054	0.923721	1.62917	1.34804	1.76305	1.65519	1.51293
PARP6	0.390832	1.02697	0.824149	1.0596	1.35525	0.58515	0.867335	0.524572	1.43025	0.665831	1.66994	0.722838	0.535274	0.719891	0.62697	0.356735	0.656871
PARP8	0.626321	0.408135	0.820785	1.85486	0.779405	0.365738	0.326319	0.589305	0.514466	1.38404	0.74349	0.218222	0.649062	0.701637	0.451504	0.344566	0.28751
PARP9	0.266904	0.785817	0.527604	1.00984	1.19305	0.797111	0.611858	0.363561	0.936024	0.478465	1.07641	0.472433	0.453376	0.612654	0.611214	0.281959	0.465543
PARVA	1.32243	1.30277	1.38492	0.888899	1.08822	1.02288	1.3258	1.34763	1.35237	1.52254	0.577866	0.918603	0.978468	0.98061	1.19343	1.5682	1.05219
PARVB	1.30165	0.644626	1.04401	1.40971	1.09991	0.490372	0.66306	1.25147	0.692933	1.95486	0.591562	0.468774	1.34583	1.2546	1.66294	1.07303	1.09581
PAX6	1.44975	0.842557	0.634295	1.28683	1.14328	0.569889	0.971242	1.02349	0.604473	0.692219	0.579881	0.605508	2.34318	1.69864	2.20442	1.1333	2.51151
PCDHGA12	0.829972	0.880996	1.17589	1.04254	1.09077	0.866687	0.800126	0.93257	1.28507	0.925701	2.15353	0.765294	0.488788	0.633905	0.558859	1.00275	0.690076
PCNA	0.604592	1.03709	0.737453	0.786859	0.986639	1.2265	0.96241	0.433171	1.41245	0.680599	1.89997	1.1299	0.735608	0.922327	0.770283	0.622964	1.00976
PDE3B	1.37609	0.792072	2.09779	0.758858	1.25425	0.986893	0.469883	1.38979	1.09822	1.88798	2.15318	0.893548	0.351307	0.33998	0.398197	1.42739	0.339279
PDGFA	0.578423	0.687792	0.737409	1.3515	1.07975	0.568748	0.691676	0.817307	0.774221	0.595075	0.907981	0.64876	0.941414	0.73569	1.10351	0.590896	0.611314
PDGFB	1.00991	1.07918	1.43225	1.0434	1.05923	0.897369	1.12975	1.41764	1.19873	1.2007	0.482472	0.913262	1.12688	0.857061	1.12133	1.59564	1.08202
PDGFC	0.945823	0.421316	1.30607	1.09808	1.04325	0.858663	0.524022	0.966566	0.7754	0.767051	1.46417	0.975081	0.254132	0.388064	0.493427	1.39276	0.262103
PDGFD	1.16076	0.626832	1.03073	1.49882	0.957704	0.543471	0.672472	1.27545	0.752976	0.906133	1.13302	0.786765	1.09484	0.880218	1.57971	0.88423	0.766637
PDGFRA	0.705214	0.972291	0.588503	1.03456	1.17837	0.787064	1.17549	0.620652	0.833087	0.476126	1.03703	1.00013	1.12142	0.647343	0.877676	1.7365	0.731721
PDGFRB	0.646163	0.804718	0.788334	1.20731	0.97239	0.820296	0.884114	1.02017	1.23093	0.765224	1.57861	1.08451	0.703996	0.50699	0.708815	0.698114	0.602628
PDK1	0.468769	0.420882	0.825714	1.08652	1.01983	0.893648	0.524083	0.500176	0.739525	0.509375	1.6299	0.693968	0.337159	0.452855	0.458013	0.487799	0.314124
PDPK1	1.27962	0.440252	1.06773	1.32327	1.15068	0.526049	0.577193	1.41666	0.507182	1.51216	0.720328	0.525655	1.37663	0.832717	1.60362	0.970964	0.734088
PELP1	2.34783	1.20514	2.45613	1.0639	1.10061	0.835492	1.24086	2.07079	1.54759	2.01787	1.44617	1.29016	0.940513	1.22436	1.72945	2.16973	1.05009
PENK	2.03258	0.783399	1.36114	1.06375	1.12849	0.807768	0.824773	1.23917	0.8532	1.02933	1.11947	0.804232	2.1874	1.77315	2.14029	1.33156	1.51063
PER1	0.417132	0.384252	0.998931	1.18929	0.775278	1.03543	0.318234	0.640837	0.827973	0.549686	1.67902	0.341892	0.54336	0.612645	0.435171	0.271805	0.282578
PER2	0.270377	0.824117	0.505174	1.14588	0.923177	0.930942	0.822602	0.390847	0.94479	0.42216	1.2455	0.733639	0.839646	0.769189	0.79192	0.199928	0.702807
PER3	0.217171	0.484856	0.252245	0.787528	0.723753	1.48872	0.569803	0.15737	0.850356	0.269235	1.76378	0.604692	0.637736	0.426236	0.320178	0.162119	0.425805
PF4	0.214597	0.00834901	0.32959	0.872481	1.02658	1.10094	0.00577292	1.00251	0.123634	0.176602	0.767767	0.0202549	0.282625	0.156341	0.0353948	0.0726084	0.0552152
PF4V1	0.457441	0.662956	0.634749	0.880519	0.636035	1.48345	0.589202	0.516892	0.906123	0.678873	1.55236	0.936259	0.865446	0.785673	0.63087	0.39798	0.783776
PFKFB3	0.780932	0.587926	0.630701	1.03678	1.0413	0.921924	0.867875	0.723595	0.724627	0.470491	0.743465	0.870626	1.90563	1.65594	1.92619	0.483854	1.15415
PFKM	0.296941	0.62641	0.451332	0.873778	0.95318	1.17304	0.667512	0.295345	0.842372	0.418653	0.917566	1.09716	0.668772	0.755226	0.5459	0.337938	0.51644
PGF	0.354043	0.922817	0.505741	0.82554	0.982843	1.19162	0.957054	0.403454	1.14312	0.639894	1.31858	1.50494	0.76411	0.86939	0.733353	0.524586	0.727615
PHB2	0.843889	0.932935	0.576742	1.01083	1.28258	0.706595	1.15121	0.841298	0.645302	0.816618	0.385723	0.728903	1.40737	0.924299	1.05006	1.29774	1.04224
PHKA1	1.57166	1.08243	1.77682	0.991386	1.27111	0.737509	1.33212	1.65915	0.804498	1.62065	0.348367	1.04041	1.97556	1.29032	1.53059	1.95245	1.56893
PHKA2	0.763208	0.542237	0.693427	0.822183	1.00077	1.17705	0.554004	0.743548	0.513261	1.21829	0.720828	1.47431	0.874171	0.716839	0.742817	0.711251	0.559223
PHKB	1.86543	0.848262	1.06217	1.07312	1.42921	0.497673	1.39397	1.36647	0.71049	1.10173	0.410765	0.884608	2.98635	2.13898	2.09027	1.6947	2.29738
PHKG1	0.612511	1.08596	1.15097	0.669444	0.817587	1.51297	0.979512	0.780292	1.07112	0.793562	1.31699	2.00037	0.942529	0.848291	0.689082	0.660983	0.762402
PHKG2	1.04595	0.666747	1.37479	1.28261	0.796626	0.920761	0.786207	1.67095	0.614447	1.51357	0.594104	1.13696	1.29911	1.27522	1.74257	1.08998	1.11397
PIAS1	1.21429	0.627903	0.981502	0.863451	0.980937	1.15561	0.616664	0.910014	0.643948	1.59815	0.632637	0.920428	0.929316	0.977714	0.975371	1.26064	0.90709
PIAS2	0.709433	0.975137	0.944592	1.00379	1.05112	0.945093	1.00907	0.896828	0.799673	0.62784	0.369544	0.669849	1.52126	1.39641	1.19665	1.26601	1.40691
PIAS3	0.766616	1.16129	0.760509	0.74312	0.959207	1.29767	0.910494	0.737709	0.971893	0.591801	0.95508	1.16983	1.64356	1.55519	2.0713	0.715872	1.186
PIAS4	1.33712	1.15587	1.08467	0.553662	0.585675	1.86066	0.641046	1.11952	0.802765	1.00501	0.819891	1.26832	1.09463	1.39537	1.22464	0.989338	0.593529
PIK3C2A	0.683183	1.55118	0.750921	0.412875	0.950333	1.63679	1.02965	0.600075	1.44492	0.713737	1.54198	1.4375	0.718139	0.782655	0.710266	1.043	0.260356
PIK3C2B	0.8817	1.01888	0.941156	1.02138	1.04606	0.932555	1.02582	0.843079	1.14693	0.983692	1.0718	0.697524	0.905674	0.989267	0.928417	1.04819	0.793703
PIK3C2G	0.592954	0.879643	0.800228	1.15193	1.33812	0.509951	0.746605	0.639077	1.07968	0.611466	1.22706	0.544586	0.680167	0.9116	0.772524	0.858682	0.651203
PIK3C3	1.11752	1.10391	1.37136	1.37766	1.34491	0.27743	1.01047	1.3592	1.2788	1.4337	1.37894	0.676341	1.32782	1.00614	1.37495	1.0391	0.939038
PIK3CA	0.9876	0.821261	0.787555	0.938682	1.0206	1.04072	0.826569	0.917438	0.774905	0.908278	0.648805	0.532107	0.984989	0.856998	1.04949	2.11869	0.769576
PIK3CB	1.19876	0.98869	1.16422	0.918757	1.40414	0.6771	0.938819	1.24417	1.2919	1.04864	1.19896	0.77417	1.00524	1.07409	1.25603	1.04307	1.15894
PIK3CG	1.30598	0.874749	1.37045	1.13392	1.29201	0.57407	0.826365	1.04066	1.06071	1.27874	0.952526	0.752706	0.646152	0.877727	0.781083	1.01758	0.756012
PIK3R1	1.71382	1.37351	2.03298	0.753763	1.40398	0.84226	1.4344	1.73229	1.4291	2.52393	0.78071	1.20418	0.900304	0.855462	1.02747	1.64912	1.09467
PIK3R2	0.637054	0.938403	0.714437	1.01147	1.274	0.71453	1.05958	0.508229	1.33396	0.577734	1.14279	0.802005	1.11914	1.24452	1.1226	0.479968	0.946211
PIK3R3	0.497533	1.05805	0.893666	0.97622	1.39955	0.624228	0.784487	0.531241	1.64195	0.480623	2.11649	0.667836	0.294804	0.495289	0.392607	0.433992	0.494982
PIK3R4	0.697344	1.19955	0.777026	0.98565	1.39667	0.617676	1.13723	0.581962	1.37054	0.71074	1.26258	0.902454	1.46805	1.07961	1.35718	0.999175	1.23414
PIK3R5	0.473017	0.783357	0.861513	0.995628	1.20335	0.801019	0.644508	0.596887	1.23727	0.370911	1.24781	0.397998	0.558624	0.419586	0.84894	0.298776	0.67522
PIK3R6	0.62306	1.14612	0.545222	0.9391	0.788353	1.27255	1.0225	0.980395	0.915776	1.05983	0.550386	0.823372	0.762083	0.741917	0.831165	0.950566	0.81569
PIM1	0.166261	0.829097	0.363116	0.992416	1.21241	0.795174	0.769524	0.295458	1.09415	0.304793	1.41799	0.626428	0.458657	0.58681	0.731641	0.111131	0.564767
PIN1	0.351896	1.06186	0.680172	0.964382	1.10565	0.929968	0.869604	0.451791	1.26568	0.689335	1.97591	0.780598	0.562544	0.635586	0.636647	0.304896	0.737156
PKIA	0.286175	0.552285	0.237064	1.05282	0.86589	1.08129	0.398545	0.35301	0.393059	0.272656	0.413704	0.247479	0.24041	0.288758	0.29753	0.630174	0.232435
PKIB	0.560503	0.950105	0.505363	0.945943	1.23198	0.822072	0.858204	0.51409	0.917229	0.620556	1.22642	0.663132	0.699147	0.780687	0.669385	0.951786	0.644497
PKIG	1.69161	0.215329	1.1952	1.23384	0.933074	0.833084	0.253234	1.15513	0.251839	3.801	0.231796	0.161027	1.14146	1.00596	0.934542	0.928611	0.846502
PLA2G10	0.637536	0.95068	1.19818	0.870884	1.18132	0.947791	0.865635	0.923969	1.1172	0.916175	1.64799	0.751307	0.64339	0.758544	0.806641	0.862684	0.6731
PLA2G12A	1.15726	0.765304	2.69382	0.929385	1.05013	1.02048	0.679222	1.84917	1.08471	1.94965	1.45773	0.65805	0.440429	0.632056	0.597294	1.34455	0.575671
PLA2G12B	0.81954	0.885471	1.02667	0.854916	1.12532	1.01976	0.858912	0.946483	1.2771	0.947887	2.14281	0.895862	0.954282	0.741686	1.02706	0.977134	0.899237
PLA2G1B	0.943816	0.826513	1.07519	0.857578	1.18595	0.956473	0.766547	2.02214	0.947755	1.03026	1.44486	0.861887	0.805629	1.05729	0.988188	1.43474	0.910401
PLA2G2A	0.777986	0.994953	0.589553	1.23232	1.16209	0.605587	1.12421	0.789736	0.717923	0.497838	0.471829	0.68816	1.63981	1.22455	1.66879	1.05412	1.63982
PLA2G2D	1.66656	0.276616	1.93171	1.12758	1.07536	0.797063	0.324104	1.15978	0.2948	2.2138	0.289985	0.258963	0.920516	1.01572	1.09207	1.00272	1.05875
PLA2G2E	0.974396	0.719276	0.765179	1.12661	1.09017	0.783218	0.743874	0.813009	0.763086	0.862059	0.828547	0.765843	1.14093	1.04335	1.24224	1.03144	1.08131
PLA2G2F	1.76573	0.876039	1.14692	1.16002	1.02161	0.818376	0.912741	1.36428	1.04474	1.56015	0.9953	0.931165	1.05061	1.35583	1.05663	1.47175	1.00501
PLA2G3	1.38748	0.958612	1.28437	0.9759	0.690929	1.33317	0.608138	0.783528	1.79798	0.948593	3.98364	1.85165	0.642313	0.323261	0.729055	1.44174	0.675947
PLA2G4A	1.30899	0.719807	1.45535	1.03623	0.889795	1.07398	0.932115	1.28825	1.40002	1.23694	2.5931	1.42704	1.24698	0.869936	1.27251	1.28558	1.02969
PLA2G4C	0.760991	0.567727	1.23096	1.29778	0.742921	0.959299	0.58508	0.733234	1.24022	0.636165	1.80962	1.30494	0.782657	0.687924	0.805241	0.829587	0.758268
PLA2G4D	2.72026	0.429133	3.25564	1.05032	1.1374	0.81228	0.491303	2.10562	0.639235	1.6622	0.736564	0.572979	0.990032	1.63121	1.15452	1.79799	1.23832
PLA2G4F	1.50031	1.11181	1.35322	1.1454	0.754723	1.09988	1.17957	1.12665	1.49354	1.07901	2.1025	1.39198	1.64067	1.481	1.76997	1.27665	1.42662
PLA2G5	0.815576	0.76893	0.819107	1.15474	0.968103	0.877154	0.708993	0.634314	1.09582	0.711889	1.23185	0.844682	0.652975	0.790545	0.796534	1.38277	0.644486
PLA2G6	0.98101	0.610978	0.567051	1.15967	0.923705	0.916627	0.653409	0.821181	0.589941	0.939004	0.586697	0.506726	0.805486	0.997299	0.84999	0.943191	0.690411
PLA2G7	1.10308	0.383715	0.902352	1.30375	1.03271	0.663536	0.494158	1.02119	0.612247	0.914753	0.674107	0.392009	1.11693	0.912097	1.28132	0.96341	0.651998
PLCB1	0.831749	0.908658	0.655099	1.04104	0.896627	1.06233	1.05138	0.697916	0.892715	0.628042	0.667452	0.714758	1.18694	1.23815	0.844123	1.45743	0.8012
PLCB2	0.29883	0.495236	0.448016	1.50174	0.851018	0.647247	0.517723	0.387628	0.565357	0.460895	0.69773	0.381623	1.33646	0.877455	1.29857	0.236524	0.620479
PLCB3	0.351372	0.642983	0.572362	1.29314	0.955273	0.75159	0.647643	0.805713	0.809742	1.00547	0.838264	0.598871	0.67188	0.738181	0.933805	0.343905	0.738627
PLCB4	1.80524	0.733122	1.46303	1.05764	0.924124	1.01824	0.78671	1.5931	0.898022	1.34021	0.940129	0.702225	1.334	1.30084	1.53317	1.35447	1.10181
PLCD1	0.46643	0.917268	0.755775	1.00802	0.927389	1.06459	0.829579	0.565259	1.07662	0.620902	1.47045	1.02151	0.838133	0.92097	0.696221	0.475898	0.72764
PLCD3	1.05153	0.632615	0.791977	1.28927	1.01849	0.692245	0.777797	1.00331	0.740763	0.640348	0.702237	0.758948	1.46208	1.11741	1.74086	0.787623	1.08493
PLCD4	1.0293	1.21346	1.07559	1.01829	1.15967	0.822032	1.73364	1.07546	1.30784	0.562499	0.520976	1.21545	1.7679	1.34582	1.46579	1.45462	1.48047
PLCE1	0.386524	1.5096	0.411265	1.0522	1.12986	0.817946	2.2367	0.423174	1.87959	0.316592	0.791749	1.8038	2.14074	2.29649	1.42264	1.10455	1.65232
PLCG1	1.13393	0.471673	0.992674	1.56298	0.783585	0.653436	0.521691	1.09945	0.528511	2.65979	0.524208	0.703182	1.12862	0.941099	1.0903	0.818819	0.471416
PLCG2	0.572114	0.761271	0.737697	0.941363	0.952432	1.10621	0.699069	0.428527	0.826913	0.729523	1.05281	1.45672	0.848647	0.630599	0.659386	0.745243	0.640112
PLCH1	0.415134	0.838372	0.583693	1.02144	0.813495	1.16506	0.776441	0.415192	0.928598	0.540903	1.1698	1.65897	0.872596	0.767732	0.654922	0.416578	0.67764
PLCH2	0.863349	1.08561	0.743255	0.880878	0.852415	1.26671	1.06679	0.703822	1.19059	0.65298	1.26943	1.85089	1.15448	1.28272	1.0297	0.667047	1.03888
PLCZ1	0.315599	1.15293	0.760714	0.602715	0.875969	1.52132	0.99195	0.442418	0.927559	0.437566	1.46845	1.99189	0.767998	0.768631	0.490423	0.263191	0.448548
PLD1	0.692639	1.08233	0.837951	0.64484	0.674398	1.68076	0.640214	0.720958	0.691538	0.383071	1.13008	2.28982	0.888601	0.501634	0.381791	0.525905	0.319508
PLD2	0.706362	1.69855	0.606414	0.482837	0.865761	1.6514	1.41044	0.635224	1.44683	0.547193	1.55893	2.20405	1.30863	1.22336	0.989959	0.760389	0.980943
PLD3	0.684347	1.64786	0.835311	0.734063	0.906283	1.35965	1.37617	0.636811	1.67309	0.962468	1.70609	2.17663	1.09172	1.23011	1.02121	0.737982	1.0772
PLK1	1.1972	0.708846	0.802861	0.941226	1.09386	0.964915	0.756595	1.25054	0.325243	1.0157	0.249338	0.414954	1.51903	1.3132	1.10293	1.16233	1.1096
PLN	0.419488	0.899257	0.367106	0.67225	1.15866	1.16909	0.739784	0.400678	0.653146	0.395205	0.640321	0.908353	0.843948	0.927797	0.815235	1.24922	0.531382
PLS1	0.584779	1.32918	0.590116	0.0369056	0.713449	2.24965	0.773282	0.460065	1.03856	1.26614	1.15242	1.50065	0.725794	0.470647	0.506638	0.472522	0.175588
PLS3	0.443854	1.3289	0.641998	0.184366	0.668435	2.1472	0.796551	0.505694	1.21416	0.697453	1.38893	1.6744	0.803201	0.716309	0.709428	0.491027	0.536122
PMAIP1	0.655214	0.900207	0.511156	0.237046	0.530631	2.23232	0.446263	0.465487	0.643234	0.552495	0.777546	0.939835	0.690357	0.755636	0.75112	0.382598	0.301425
PML	1.51802	2.22296	2.21142	0.697183	1.01189	1.29092	1.60265	1.78771	1.52594	2.72964	1.2979	1.76203	1.02479	1.0484	1.2091	1.77133	1.20628
PMS2	1.28088	0.730392	1.25677	0.931183	1.25296	0.815857	0.676953	1.017	1.05394	1.0676	0.972732	0.377366	0.826495	0.81836	1.0284	0.974949	1.01624
PNLIP	0.530407	0.967675	0.809043	1.04706	1.19566	0.75728	0.852661	0.562472	1.48422	0.728578	1.44534	0.80823	0.77788	0.919814	0.702362	0.491527	0.92642
POLA1	0.818135	1.05829	1.58549	1.14685	1.46513	0.388019	0.489581	0.996679	1.55265	0.892604	1.93309	0.195615	0.394279	0.301326	0.397149	0.935727	0.457031
POLD1	0.729549	0.857991	0.899776	0.67412	1.06858	1.2573	0.728119	0.627646	1.62852	0.880177	1.68716	0.933061	0.593321	0.955897	0.546198	0.753522	0.930462
POLE	1.02939	0.905315	0.781297	0.982372	1.09554	0.922092	0.810321	0.717855	0.953813	0.757202	0.972521	0.530684	0.81872	0.777042	0.932833	1.76684	0.689773
POLR1A	1.13762	0.763853	0.63518	1.0289	1.05936	0.911738	0.850811	0.871511	0.876597	0.965727	0.579685	0.576491	0.96409	1.11473	1.19634	0.990809	0.944377
POLR1B	1.61245	1.77916	2.55244	0.923989	0.886008	1.19	1.89634	2.00309	2.20025	2.12899	0.866528	1.85715	1.17853	1.02948	1.2319	2.14706	1.4207
POLR1C	0.87771	0.935806	0.859711	0.948049	1.16863	0.883316	1.0037	0.753695	1.17068	0.84174	1.12965	0.799953	1.07734	1.32304	1.25981	1.04746	1.01653
POLR1D	1.03198	0.939708	0.780197	1.04102	1.21759	0.741394	0.890079	0.932245	1.01716	0.739608	0.98998	0.694143	1.27498	1.28401	1.48657	0.968613	1.40291
POLR1E	0.592385	0.834535	0.454458	1.27543	1.05607	0.668499	0.818469	0.6385	0.777288	0.66837	0.897578	0.575093	1.17449	0.908613	1.2649	0.532784	0.905332
POLR2A	0.337115	0.687123	0.435815	0.927261	1.44281	0.629929	0.524643	0.365151	0.834291	0.485982	1.44192	0.526213	0.557823	0.492745	0.620137	0.29541	0.641932
POLR2B	0.553656	1.12759	0.8247	0.841258	1.39291	0.765837	0.84735	0.568779	1.47199	0.817907	2.08405	0.843656	0.49407	0.495102	0.582158	0.550443	0.722981
POLR2C	0.895031	1.11903	0.671015	1.2462	1.12581	0.62799	1.04538	0.791981	1.09392	0.802644	1.51787	0.773939	1.34242	0.955908	1.23238	0.889383	1.196
POLR3D	0.615378	1.16856	0.804341	0.985649	1.1818	0.832551	0.757382	0.690398	1.20654	0.975881	2.05258	0.662613	0.586446	0.522595	0.686141	0.726263	0.678051
POLR3F	0.889802	1.23275	1.02302	0.938599	1.09446	0.966939	1.2811	1.04736	1.30911	1.43667	0.603871	0.921822	1.0354	0.782502	1.16098	1.1285	0.916419
POLR3K	0.618391	0.92124	0.741542	1.24216	1.12746	0.630382	0.862134	1.01167	1.17201	0.836131	1.39119	0.623086	0.981668	0.678676	1.19937	0.68125	0.686053
POU2F1	1.44532	0.915793	1.25537	1.08229	1.06311	0.8546	0.831371	1.26538	1.19184	1.62629	1.4902	0.827026	0.740175	0.853228	0.850413	1.38487	0.867433
PPAP2B	1.10783	1.37465	1.2253	1.07254	1.26912	0.658338	1.40626	1.36274	1.22794	1.12896	0.527247	1.07448	1.20944	0.970687	1.23201	1.82604	1.12734
PPARA	1.36955	1.3369	2.09263	1.05962	0.979369	0.961011	1.60176	1.55551	1.75013	1.15883	0.584068	1.00888	1.3152	1.31339	1.5981	1.90796	1.40229
PPARD	0.907245	1.0611	1.30633	0.770805	1.22121	1.00799	0.812348	1.25146	1.43191	0.965693	2.15113	0.730004	0.554755	0.520976	0.794921	0.661288	0.658105
PPARG	1.43031	1.1222	1.60401	1.10049	1.16441	0.7351	1.30751	1.7224	1.06044	0.696499	0.852275	0.975158	1.79111	1.41557	1.50267	2.23678	1.06387
PPARGC1A	1.48174	0.982498	1.90396	1.02713	0.799689	1.17318	0.821633	1.48165	1.49748	1.48073	1.81842	1.02585	0.603194	0.532075	0.785812	1.48379	0.709012
PPBP	1.33055	0.807738	1.63807	1.03037	0.899484	1.07014	0.737884	1.11034	1.11257	1.40164	1.60997	0.857726	0.512941	0.604186	0.587247	1.40405	0.568829
PPP1CB	0.662595	0.732367	0.780398	0.992973	0.99298	1.01405	0.741107	0.610281	1.11044	0.953855	1.30843	0.842787	0.874461	0.648049	1.13956	0.575123	0.724551
PPP1R10	0.699832	0.702741	0.395698	1.15199	0.938063	0.909947	0.711031	0.480383	0.794835	0.4531	0.670183	0.657676	0.627241	0.552854	0.547589	1.45917	0.502242
PPP1R11	1.36045	0.801787	1.60354	1.54434	0.685811	0.769851	0.80752	1.8322	1.25526	1.31736	1.52183	0.939685	1.2196	0.97111	1.19814	1.67629	0.83778
PPP1R12A	0.794712	0.947198	0.998337	1.3784	0.900791	0.720812	0.910748	0.817086	1.42885	0.783755	1.33112	1.12221	0.776799	0.881018	0.92639	1.52131	0.603328
PPP1R12B	1.14266	1.25176	1.15885	1.10789	0.730292	1.16182	1.1318	0.980554	1.96169	1.32498	2.03472	1.52028	0.956516	0.950384	1.11245	1.02094	1.00083
PPP1R12C	1.42196	0.739293	1.23029	1.59678	0.585537	0.817685	0.801379	1.21078	0.997825	2.11453	0.856869	0.772093	1.12551	1.46597	1.39305	1.02169	1.03182
PPP1R13B	2.04207	1.11621	1.23121	1.13627	0.736167	1.12757	1.167	1.15896	1.45477	1.53251	1.80054	1.2508	1.36741	1.61666	1.4255	1.06459	1.40869
PPP1R14A	2.12087	0.777863	1.28349	1.66306	0.478073	0.858862	0.830685	1.3245	0.877601	2.7617	0.800451	0.730406	1.64275	1.86347	1.59318	1.33862	1.7654
PPP1R14B	0.972825	1.02059	0.643443	1.23861	0.839678	0.921707	1.11622	0.775572	1.14601	0.981957	1.03917	0.875837	1.22337	1.32907	1.22693	0.734788	1.05333
PPP1R15A	1.07823	0.684036	0.82937	1.24104	0.886997	0.871967	0.773418	0.979537	0.861059	1.11204	0.895771	0.571017	1.05544	0.849558	1.281	0.849822	0.692972
PPP1R16A	0.927567	1.05788	1.2013	1.02342	0.83434	1.14224	1.01721	0.902424	1.50049	1.13166	1.51613	1.0399	0.910082	1.02383	0.861683	0.965272	1.12966
PPP1R1A	0.917068	0.668016	0.757558	1.25363	0.961144	0.785227	0.701605	0.870664	0.80692	0.830808	0.873821	0.581813	0.848409	0.908425	0.942347	0.712182	0.717454
PPP1R1B	0.830841	0.694667	0.850055	1.01464	1.04517	0.940188	0.737863	0.985714	0.638255	0.433868	0.33294	0.507161	1.3055	1.27842	1.03921	1.63697	1.03364
PPP1R2	0.335257	0.738545	0.599484	1.06411	0.773228	1.16266	0.650778	0.46263	1.05598	0.539937	1.1143	0.676328	0.70891	0.74491	0.553619	0.577326	0.601522
PPP1R3A	1.86815	0.607047	0.817941	0.939526	1.24392	0.816559	0.780511	1.16099	0.609468	1.12729	0.536182	0.5256	1.11618	1.40101	1.14362	2.06139	0.676073
PPP1R3B	0.367259	0.753323	0.355007	0.922562	1.2181	0.859336	0.806679	0.357133	0.802147	0.265055	0.637769	0.704795	0.718071	0.76847	0.742989	0.948105	0.601274
PPP1R3C	0.273794	0.859268	0.337006	0.972307	1.04777	0.979927	0.86319	0.246345	0.905492	0.28899	0.932554	1.09039	0.67839	0.798492	0.626745	0.430003	0.59403
PPP1R3D	0.930505	0.6944	0.549883	1.02905	1.12357	0.84738	1.09368	0.734054	0.580832	0.755309	0.464021	0.703265	1.19136	1.24622	1.03301	0.781597	1.048
PPP1R3F	0.774952	0.492253	0.75273	1.45467	0.995865	0.549463	0.645314	0.885009	0.496777	1.17623	0.441534	0.783762	1.2894	0.841866	1.30424	0.669327	0.666979
PPP1R7	0.303212	0.950978	0.558413	1.11392	0.896276	0.989804	0.751565	0.351644	0.954781	0.544632	1.18358	1.6094	0.832855	0.749202	0.615754	0.321779	0.745002
PPP1R8	0.90572	0.827851	0.597691	1.08106	1.0784	0.840543	0.909592	0.713396	0.703598	0.564183	0.672841	1.0345	1.68433	1.79822	1.76172	0.718888	1.35533
PPP1R9A	1.19136	0.954904	0.471477	1.10188	0.722628	1.17549	0.803629	0.758954	0.823435	0.624758	1.01569	1.50982	1.38669	1.22881	1.42857	1.03498	0.942032
PPP1R9B	0.405234	1.2751	0.596559	0.980618	0.873353	1.14603	0.994624	0.442455	1.107	0.655344	1.29359	1.91249	1.01562	0.902987	0.919904	0.428468	0.835094
PPP2CA	0.743958	0.597331	0.623732	1.25881	1.15169	0.589503	0.452597	0.891861	0.420933	0.658244	0.521344	1.02723	1.10806	0.969179	1.42553	0.734267	0.69591
PPP2CB	1.09062	1.71553	0.904246	0.792588	0.926594	1.28082	1.34852	0.726762	1.46739	0.85711	1.53996	2.11845	1.51656	1.79261	1.47964	0.781824	1.54454
PPP2R1A	1.32029	1.41016	1.1497	0.901819	0.968311	1.12987	1.08199	1.21015	1.3186	1.11327	1.37846	1.97593	1.1365	1.34901	1.24888	1.04154	1.04454
PPP2R1B	1.39727	1.91201	1.4519	0.600447	0.998356	1.4012	1.29443	1.20058	1.37844	1.52674	1.51	2.43145	1.4995	1.36495	1.40659	1.2816	1.15141
PPP2R2A	0.535552	1.92584	0.845425	0.241333	0.646365	2.1123	0.82862	0.751187	1.45093	0.936468	1.71732	2.80394	1.087	0.772784	0.983718	0.818774	0.435324
PPP2R2C	1.66705	2.37468	1.69977	0.4754	1.24761	1.27699	2.55906	2.63727	1.53475	1.33191	0.973143	2.3944	1.75305	1.4772	1.50147	2.48256	0.57364
PPP2R3A	3.14383	1.18317	3.48598	0.810098	1.12616	1.06375	0.951549	3.33742	0.885147	2.66758	0.822728	0.947094	0.890252	1.13087	0.897295	2.76713	0.970511
PPP2R3B	0.7931	1.68567	0.863957	0.565847	0.790964	1.64319	1.14558	0.904489	1.26751	0.789454	1.27717	1.73712	1.09111	1.08788	1.3027	0.628739	0.924106
PPP2R4	0.927202	2.33009	1.76807	0.998635	0.605991	1.39537	1.94312	1.58981	1.59897	0.304403	0.80888	1.84626	2.32228	2.20711	1.91302	1.79411	2.18587
PPP2R5A	0.936961	0.945235	0.837017	1.0271	1.09279	0.880104	1.00173	0.762225	0.903608	0.674114	0.712424	0.566252	1.19278	1.01301	0.936605	1.56294	0.957633
PPP2R5B	0.635273	1.32504	0.616655	1.13731	1.23571	0.626979	1.50977	0.742297	1.24559	0.485005	0.623614	0.964072	1.37182	1.42767	1.08718	1.26655	1.40785
PPP2R5C	3.88068	0.946512	2.81069	0.906412	1.13514	0.958445	0.941057	2.50054	1.30181	2.65987	0.930027	0.729015	1.61513	1.72559	1.52067	2.66959	1.59231
PPP2R5D	1.41777	1.21563	1.16244	0.919561	1.04179	1.03865	1.12484	1.00566	1.78843	1.13729	1.5968	1.0611	1.24483	1.44356	1.31703	0.975792	1.36781
PPP2R5E	0.620139	1.20658	0.398096	0.700978	1.14432	1.1547	1.32953	0.70082	1.2959	0.443744	0.618847	0.827743	0.727981	0.820505	0.6281	1.12174	0.536903
PPP3CA	1.03706	0.92466	1.06439	0.841896	1.1668	0.991304	0.872442	0.799885	1.18688	0.577847	1.35629	0.598808	0.695269	0.77948	0.617806	2.8807	0.645873
PPP3CB	1.1416	0.914874	0.722422	1.08247	1.23319	0.684348	0.896792	0.822966	0.995156	0.657279	0.997651	0.72942	1.69895	1.37971	1.90007	0.725734	1.43957
PPP3CC	0.365496	1.2083	0.430738	0.805413	1.36437	0.830218	1.03183	0.358658	1.21619	0.39917	1.07769	0.929594	0.688629	0.753307	0.818474	0.470053	0.747383
PPP3R1	0.228259	0.801019	0.462857	0.74407	1.50329	0.75264	0.698421	0.345247	1.05683	0.361539	1.14177	0.535155	0.492748	0.512319	0.624601	0.228655	0.54797
PPP3R2	0.768338	0.710185	0.597505	0.780297	1.46453	0.75517	0.618793	0.770968	0.994602	0.510635	1.2253	0.496858	0.83295	0.627633	0.95209	0.633954	0.819782
PREX1	0.481147	1.06638	0.683687	0.964057	1.41296	0.622987	0.783588	0.504511	1.28047	0.565483	1.99976	0.739701	0.746289	0.660782	0.778752	0.420438	0.786081
PRF1	2.01827	1.19986	0.99569	1.10587	1.25661	0.637526	1.2995	1.55697	0.951906	1.30119	0.796368	1.03548	1.79218	1.39884	1.6352	1.95101	1.83739
PRG2	0.909232	0.896188	0.73878	0.907982	1.30387	0.788146	0.773612	0.632166	1.19861	0.754077	1.69951	0.810244	0.855202	1.02147	0.933511	0.64991	1.04768
PRG4	0.487924	0.884978	0.735775	0.912934	1.59883	0.48824	0.366019	0.466523	1.10831	0.510247	2.53722	0.326151	0.428538	0.203614	0.601708	0.457968	0.589152
PRKAA1	0.441538	0.825536	0.795964	0.840148	1.33188	0.827968	0.480405	0.62473	1.1585	0.600126	2.45432	0.473355	0.562515	0.284823	0.59987	0.418562	0.652744
PRKAA2	0.269245	1.09693	0.57219	0.898993	1.35424	0.746762	0.757243	0.382174	1.17713	0.409986	1.81865	0.651334	0.511121	0.493319	0.625333	0.317086	0.603049
PRKACA	0.444936	0.781241	0.540344	1.40067	0.901091	0.698243	0.736957	0.434946	1.11916	0.499947	1.1423	0.613203	0.775785	0.715558	1.01756	0.349391	0.678586
PRKACB	0.449292	0.79098	0.450106	0.834662	1.30518	0.86016	0.728366	0.42077	1.10138	1.14443	1.23053	0.603301	0.54843	0.605091	0.72191	0.361328	0.640528
PRKACG	0.55384	0.446948	0.288263	0.450767	2.1594	0.38983	0.429048	0.472328	0.601028	0.380308	0.692474	0.390552	0.494628	0.466101	0.536564	0.402976	0.478338
PRKAR1A	1.16117	0.750137	1.11467	1.12469	0.834008	1.0413	1.10854	1.18086	0.759252	2.06516	0.474558	0.663338	1.0287	0.982523	1.18684	0.960131	0.967791
PRKAR1B	0.64716	1.15219	0.668917	1.08242	0.80836	1.10922	1.12203	0.527997	1.65096	0.786852	1.43311	1.22071	0.878653	0.88819	0.955446	0.83152	0.989163
PRKAR2A	1.1515	1.43219	1.45509	1.47747	0.456212	1.06632	1.68326	1.55951	2.3169	1.07035	1.64133	1.51341	1.01005	0.737535	0.779161	2.13928	0.781725
PRKAR2B	0.975303	1.08742	1.25014	1.22915	1.07778	0.693068	1.12683	1.41277	1.50384	0.901195	1.38348	0.973718	1.09129	1.06009	0.858291	1.67651	0.842374
PRKCA	1.54184	0.580785	1.78096	1.62863	0.743332	0.628034	0.758487	1.98782	1.12811	1.4126	1.09634	0.555179	2.06069	1.02132	2.32484	1.39501	1.23287
PRKCB	1.00786	1.15943	1.1733	1.11918	1.08356	0.797257	1.43475	1.05532	0.959873	0.821803	0.424463	1.14807	1.63754	1.23165	1.60321	1.56601	1.51687
PRKCD	1.02941	0.906713	0.886027	1.4453	0.650685	0.90401	1.03263	1.08916	1.32214	1.07788	1.29006	0.828314	1.16399	1.16733	1.28302	0.890088	1.00337
PRKCE	0.938838	1.03466	0.874056	1.35641	0.605261	1.03833	1.15474	0.759181	1.67209	0.816236	1.5537	0.80346	1.00746	0.97243	0.997018	0.884789	0.721853
PRKCG	1.07143	0.923262	1.28025	0.971172	0.877127	1.1517	0.924658	1.08214	1.54427	0.859131	1.66585	0.514898	0.784087	0.681943	0.728446	1.25205	0.535686
PRKCH	1.42421	1.18669	2.13958	0.891863	0.963493	1.14464	1.48126	1.89864	1.20804	1.71918	0.405976	1.07477	1.11183	1.06766	1.24404	1.69464	1.11096
PRKCI	0.933118	1.04498	2.88326	0.966559	1.02651	1.00693	1.0714	1.8189	1.44379	0.959892	1.518	0.600582	0.687991	0.743637	0.776219	1.23784	0.451767
PRKCQ	1.61906	0.844598	1.02062	1.12199	1.03587	0.842141	0.972438	1.2713	1.06076	1.14029	0.960172	0.655789	1.17437	1.10645	0.958655	2.5514	0.904503
PRKCZ	1.98714	0.591252	2.03095	0.931898	1.21992	0.848185	0.775087	2.1068	0.977542	1.66911	0.985115	0.511582	0.765869	0.786388	0.897501	1.53021	0.471682
PRKD1	0.622396	0.771363	1.0958	1.24766	0.685245	1.0671	0.659109	0.6441	1.08736	1.1177	1.21591	0.363491	0.757359	0.667348	0.511379	0.684377	0.46319
PRKD3	1.49817	0.333913	1.15076	1.63553	0.948886	0.415584	0.419455	1.09746	0.373622	3.47043	0.306375	0.30475	1.82494	1.59019	1.21096	0.852896	1.31997
PRKDC	1.69549	1.5397	2.35023	1.00085	1.36026	0.638893	2.11451	1.81154	1.66397	2.63014	0.846293	1.75632	1.35948	1.167	1.43167	1.89637	1.3303
PROK1	0.577733	0.899106	0.620948	1.06586	0.919702	1.01444	0.723445	0.604448	0.844855	0.644847	1.13783	1.17121	0.866653	0.76628	0.694767	0.512743	0.668776
PRPS1	0.644772	0.569635	0.483127	1.09215	1.26764	0.640213	0.739296	0.691085	0.405228	0.503035	0.346416	0.603106	1.4811	1.11896	1.40885	0.871258	1.32492
PSEN1	0.337053	0.868811	0.517553	1.22825	0.870657	0.901088	0.754297	0.624824	0.697721	0.606413	0.882477	1.14647	0.711173	0.64363	0.768508	0.345741	0.490724
PSEN2	1.38072	1.00667	0.997217	1.20923	0.890696	0.900075	0.831124	1.12071	0.846776	1.1785	0.987776	1.40502	1.27	1.53731	1.38815	0.987216	1.1386
PSIP1	0.766966	0.555363	0.600038	1.43501	1.09314	0.47185	0.646774	0.872192	0.460526	0.834394	0.450016	0.630828	1.0621	0.986604	1.24679	0.602694	1.03269
PSMA1	2.10671	1.03905	1.26021	1.12669	1.01813	0.855183	1.20966	1.57038	0.806406	1.89709	0.755902	1.15314	1.24441	1.2187	1.30767	2.30394	1.21888
PSMA2	0.221299	1.57213	0.467928	1.14231	0.764023	1.09367	0.87136	0.361111	1.15657	0.508346	1.40507	1.99089	0.827148	0.753747	0.786532	0.235834	0.617474
PSMA3	1.37455	1.57784	0.743097	0.962885	1.0553	0.981812	1.26332	0.812546	1.25296	1.3843	1.33126	1.82884	1.27636	1.50009	1.22801	0.806491	1.09733
PSMA4	0.348511	2.04769	0.429622	0.986111	1.15377	0.860123	1.06991	0.372642	1.48433	0.286341	1.66916	2.24656	1.07805	0.978918	1.0225	0.457452	0.566112
PSMA5	0.790928	1.96214	0.668994	0.636976	1.35306	1.00996	1.3854	0.756533	1.23981	0.969035	1.4195	1.92614	1.30416	0.990681	1.14935	1.36637	0.826497
PSMA6	0.706792	2.60065	0.918177	0.758792	0.842388	1.39882	1.46627	1.00257	1.87873	1.05356	2.06029	2.67946	1.56768	1.0771	1.45783	0.671859	0.905599
PSMA7	1.15654	2.33996	0.931716	0.856667	1.02148	1.12186	1.50501	1.02349	2.00774	1.38351	2.06689	2.34123	1.44058	1.49767	1.50561	0.949803	1.27543
PSMB1	0.707613	0.814222	0.767637	0.942157	0.899201	1.15864	0.83374	0.759431	1.37469	1.16205	1.48883	0.404313	0.935029	0.942959	0.791396	0.669044	1.03811
PSMB10	1.2213	0.679773	0.984751	1.28882	0.996388	0.714791	0.794658	1.44975	1.00843	1.41696	0.875409	0.440588	1.3631	1.01809	1.66744	1.11813	1.02201
PSMB2	0.811098	0.944885	0.910355	1.15986	1.00158	0.838551	0.786934	0.787176	1.5479	1.0009	1.76714	0.668493	1.28294	1.07118	1.10398	0.758045	1.19744
PSMB3	1.55933	0.849042	1.1605	1.0203	1.09422	0.885483	0.781745	1.2136	1.39481	1.57807	1.37756	0.681463	1.06793	1.07952	1.25195	1.21202	1.18882
PSMB4	2.45381	0.962733	1.04551	1.13137	0.991451	0.877177	0.972595	1.49779	1.25334	1.93691	1.23034	0.838841	1.39903	1.62223	1.61577	1.48778	1.36604
PSMB5	0.640625	1.24943	0.800579	0.891114	1.09316	1.01573	1.03495	0.619391	1.59349	0.789005	1.86382	0.897758	0.914532	0.847144	0.86441	0.837695	0.977201
PSMB6	1.37738	1.82727	1.20413	0.876896	1.27413	0.84897	1.61771	1.62444	1.17975	1.33854	0.837742	1.02438	1.09015	0.96555	1.26318	2.43278	1.07469
PSMB7	0.773374	0.999455	1.20383	0.717697	1.20064	1.08166	1.05255	1.16989	1.19569	0.876617	0.52681	0.913218	0.890089	0.867402	0.829278	1.16567	0.942064
PSMB8	0.975287	1.10097	1.6119	0.874849	1.2036	0.921555	1.12392	1.60309	1.40496	1.10465	0.536965	1.00453	1.12753	1.1467	1.16897	1.53842	1.32045
PSMB9	0.678797	0.887116	0.825572	1.18603	1.28181	0.532162	0.817376	0.901389	0.984703	0.650119	1.15855	0.627913	0.843306	0.684048	0.799187	0.657729	0.646815
PSMC1	1.05402	0.71417	0.925366	1.36982	1.21568	0.414495	0.639756	1.10155	0.722861	1.55567	0.813714	0.413929	1.17663	0.636632	1.61723	0.859632	0.618924
PSMC2	1.40576	1.06179	1.23866	0.960023	1.28253	0.757444	0.989257	1.13999	1.3644	1.04108	1.86348	1.00339	1.40309	1.21833	1.62078	1.1146	1.37006
PSMC3	0.978147	1.21545	0.758917	0.811675	1.43488	0.753444	1.06392	0.745241	1.17697	0.76902	1.44929	0.948966	0.639466	0.732901	0.677652	2.21127	0.724035
PSMC4	1.33614	0.678697	1.58511	1.42769	0.797944	0.77437	0.765203	1.59765	0.819117	1.7487	0.806846	0.518799	1.39592	1.17584	1.45109	1.02614	0.93049
PSMC5	0.397352	0.750757	0.522594	0.598858	2.00204	0.399105	0.541484	0.381815	0.87665	0.490704	1.27328	0.553383	0.476402	0.40172	0.501673	0.340484	0.627182
PSMC6	1.30828	1.71566	1.47511	0.978801	1.10111	0.920085	1.60906	1.09359	1.88306	1.03408	2.09592	1.17713	0.881852	0.829284	0.956068	2.77184	0.98432
PSMD1	1.09148	0.818073	0.901049	1.32136	1.07387	0.604762	0.790811	1.16877	0.987581	1.22276	0.951538	0.641759	1.17676	1.02855	1.46699	0.898432	0.996731
PSMD2	0.814664	1.37872	0.970225	0.83896	1.17924	0.981803	1.03195	0.879485	1.7401	0.91949	2.04778	0.979009	0.71994	0.641358	0.862439	0.949569	0.876092
PSMD3	1.18244	0.963766	1.50518	0.982455	0.789249	1.2283	1.01836	1.63981	0.681231	1.30678	0.332559	0.736036	0.941832	0.841693	1.0261	1.61059	0.992463
PSMD4	1.8539	0.790777	1.23812	1.18644	0.997715	0.815845	0.838161	1.22064	1.10384	1.34554	0.884272	0.686821	1.40858	1.47667	1.5975	1.22605	1.20128
PSMD5	0.727462	0.825088	0.394269	1.33984	0.719726	0.940432	0.839398	0.659568	0.637541	0.734696	0.369885	0.38963	1.11569	1.14662	0.811486	0.590492	0.643247
PSMD6	1.69414	0.612003	1.16788	1.47588	0.711105	0.813017	0.674062	1.28108	0.810453	2.66789	0.730961	0.485595	1.21535	0.969654	1.56467	1.06882	0.804734
PSMD7	0.877599	0.999415	0.889812	0.845113	1.21529	0.939593	0.964436	0.856977	1.53561	0.837023	1.50602	0.973379	1.0609	0.715576	1.09114	0.766958	1.01774
PTCH1	1.11416	1.54396	1.13585	1.11586	0.871712	1.01243	1.70333	1.39539	1.09416	0.963856	0.498656	1.40767	1.25338	1.04522	1.39855	1.51846	1.1842
PTCH2	1.60551	0.572936	0.888561	1.27533	0.823425	0.901241	0.651978	1.41665	0.606879	2.09712	0.427815	0.429672	1.05468	1.02986	1.31396	0.978138	0.886305
PTEN	0.771039	1.03246	1.03046	1.07059	0.267807	1.66161	1.10688	0.912778	2.16082	1.4061	1.88572	0.91904	0.904337	0.596001	1.10863	0.665902	1.03468
PTGES3	0.851589	0.912603	0.983539	1.35007	0.755126	0.894799	1.10513	0.926697	1.92438	0.985658	1.58675	0.737575	1.03968	0.831547	1.12852	0.621746	0.750808
PTGS1	1.41245	0.818711	1.69995	1.51453	0.989413	0.49606	0.914475	1.64092	1.28961	1.25927	0.958851	0.649477	0.960942	0.449355	0.961218	1.10634	0.518957
PTGS2	1.03909	0.671921	0.928519	1.77017	0.809356	0.420477	0.87549	1.29973	1.14876	0.838937	1.0481	0.524128	1.58224	0.847236	1.91502	0.813544	0.775984
PTK2	0.552345	1.12802	0.718779	1.31643	0.833813	0.849756	1.26322	0.58297	1.49654	0.683899	1.39862	1.03657	1.01837	1.11242	1.17858	0.404456	0.907883
PTK2B	1.52594	0.929892	1.0372	1.76498	0.571495	0.663527	1.11331	1.34835	1.32623	1.04477	1.10096	0.835601	2.0785	1.31121	2.28343	0.990572	1.16771
PTK7	1.00703	1.37843	1.1918	1.193	0.854782	0.95222	1.52194	1.0768	2.40376	0.969592	2.24761	1.24447	1.20971	1.04362	1.02855	0.789579	0.953922
PTN	0.415602	1.24373	0.60032	1.02459	0.754618	1.22079	1.37082	0.430439	1.95479	0.489559	1.85666	0.863178	0.776343	0.767178	0.7589	0.387493	0.637506
PTPN1	1.20107	0.621324	0.755688	1.3815	0.84272	0.77578	0.760286	1.1067	0.934119	1.15438	0.827725	0.465797	0.712411	0.853129	0.935825	1.02637	0.576845
PTPN11	0.150204	0.755453	0.432368	0.964742	0.984386	1.05087	0.807664	0.292852	1.34293	0.440838	1.43393	0.45419	0.468494	0.448822	0.481525	0.129588	0.360981
PTPN2	0.554279	1.08764	0.714873	0.979731	0.830363	1.18991	1.15157	0.60574	1.58209	0.660223	1.82468	0.963415	0.980698	0.867508	0.996714	0.505209	0.923392
PTPN3	1.07702	0.605446	0.923328	1.38821	1.06411	0.547679	0.774957	1.20507	0.858621	0.722728	0.699169	0.505159	1.20121	1.08704	1.22893	0.748497	0.714416
PTPN6	1.11935	0.655139	0.516635	1.21815	1.23706	0.544784	0.922979	0.918597	0.594262	2.13059	0.458129	0.494512	2.0441	1.66946	1.76294	0.946899	1.37067
PTPRA	1.91879	0.930849	1.08263	1.24119	0.974304	0.784503	1.05267	1.4727	1.02488	2.29615	0.924946	0.914036	1.4532	1.99872	1.69505	1.1636	1.92677
PTPRB	0.759168	0.913781	0.928198	1.11406	0.935869	0.950074	0.872729	0.801327	0.928156	0.802293	1.03826	0.854815	0.730919	0.845904	0.659362	1.35699	0.662492
PTPRC	0.378667	0.704275	0.528499	1.20333	0.964107	0.83256	0.875777	0.832421	0.659107	0.579733	0.445556	0.618933	0.937952	0.790711	0.64668	0.77811	0.763594
PXN	0.574809	1.37479	0.845239	1.21854	0.789468	0.991993	0.928082	0.537006	1.01612	0.662838	1.28045	1.70552	0.878925	0.820455	0.752768	0.573346	0.911191
PYGB	0.817257	1.21297	1.65924	1.43804	0.677069	0.884886	0.742628	0.976562	0.899134	0.999819	1.24873	1.72781	0.845629	0.758751	0.771317	0.909066	0.828768
PYGL	1.03897	1.18834	1.12814	1.18314	0.952162	0.864701	0.935728	0.780872	0.886362	1.37597	1.05555	1.44945	0.961999	0.960347	0.855258	1.08251	1.00931
PYGM	1.03986	0.709459	0.6281	1.18118	1.02948	0.789334	0.758883	0.899409	0.425104	0.999314	0.358049	0.623272	0.888073	0.898505	0.914915	1.09221	1.08706
PYGO1	0.731619	0.665555	0.567266	1.23051	0.930343	0.839145	0.795312	0.757184	0.504136	0.706542	0.468088	0.645644	1.14979	0.916917	1.05051	1.0298	0.83347
PYGO2	1.67429	1.92883	1.6488	1.03161	0.870823	1.09757	1.463	1.55613	1.38706	1.35956	1.64635	2.48707	2.15479	1.62089	2.12256	1.31449	1.66439
RAB5A	1.72948	2.61283	2.69813	0.442766	1.00066	1.55657	1.22236	1.80942	0.879629	1.99025	2.23578	3.51028	1.82328	1.02063	1.79776	1.85092	1.16948
RAC1	1.00827	1.56201	0.67383	0.73014	1.25984	1.01002	1.12941	0.703858	1.03735	0.949121	1.11692	1.32031	1.18452	0.8648	1.297	1.48662	0.892545
RAC2	1.69104	1.44641	1.027	1.07727	0.852052	1.07068	1.11908	1.30575	1.39502	2.80438	1.46461	1.49989	1.50896	1.14379	1.41393	0.750556	1.28783
RAC3	3.12576	2.64561	1.99204	1.32043	0.49502	1.18455	1.87511	2.57717	1.55282	1.91722	1.95397	2.99294	3.32077	2.89747	3.83142	1.80076	2.26061
RAD51	2.60954	0.469348	3.54221	1.02187	1.18718	0.790956	0.691183	2.54827	0.383355	2.04386	0.360332	0.164258	0.921474	1.23957	1.09298	1.8431	1.0404
RAF1	1.12184	0.877475	1.47195	1.23705	1.36295	0.399994	0.524916	1.19525	1.51283	0.940028	2.44256	0.275778	1.10271	0.797805	1.23699	1.18633	1.01719
RALA	0.896801	1.27217	1.24443	1.25041	1.19164	0.557953	0.996231	1.03082	1.58798	1.41393	2.56144	0.87924	1.0373	0.902818	1.12014	0.978987	1.12277
RALB	0.96513	1.02151	1.37931	1.12355	1.20764	0.668805	0.869075	1.01116	1.06243	1.18727	1.41304	0.667648	1.04278	0.843996	1.00933	1.18501	0.874703
RALBP1	1.37134	1.94763	2.4125	0.757629	1.4065	0.835871	2.0495	1.76963	2.1584	2.32986	1.46823	1.95988	1.06531	0.880759	1.23484	1.73636	1.31465
RALGDS	1.06853	0.95416	1.13685	1.11706	1.25253	0.630415	0.905025	0.931724	1.02472	0.921789	1.12554	0.835195	1.32087	1.22542	1.50134	1.30055	1.3082
RAN	0.670057	0.795984	0.611886	1.27994	1.24023	0.479827	0.774866	0.623062	0.896569	0.841921	1.22977	0.543337	1.45214	1.23561	1.54164	0.457131	0.971114
RAP1A	0.638626	1.19417	1.05039	1.00604	1.32159	0.672374	0.601781	0.74428	1.64201	0.942288	3.06824	0.679563	0.552009	0.468407	0.60644	0.513809	0.908181
RAP1B	0.601633	0.54349	0.760184	0.817614	1.33693	0.845456	0.330288	0.382057	1.1829	0.759879	2.2488	0.41409	0.642733	0.326562	0.449005	0.286597	0.853126
RAP2A	1.07361	0.927228	0.856193	0.835786	1.56465	0.599568	0.21285	0.862347	1.18978	1.14877	2.2833	0.427861	0.458274	0.183683	0.559556	0.634405	0.633642
RAPGEF1	1.1771	0.721885	0.694591	1.02894	1.28484	0.686213	0.727239	0.963351	0.57705	1.14752	0.449887	0.472102	1.3525	1.09989	1.28533	0.832011	1.15408
RAPGEF3	1.96031	1.21424	1.61194	1.06902	1.08822	0.842763	1.18991	1.57048	1.52956	1.46644	1.76282	1.10962	1.45241	1.45506	1.45672	1.41014	1.27847
RAPGEF4	1.32098	1.9693	1.46227	1.23641	0.861138	0.902448	1.49521	1.70905	2.51691	1.3886	2.48052	1.28167	1.28505	0.634718	1.26116	1.12702	1.32504
RASA1	0.954416	0.880603	0.923305	1.4511	0.996307	0.552589	0.833661	1.18744	1.00498	0.784357	0.815582	0.671764	1.4301	1.07988	1.77747	0.864407	1.0425
RASA2	0.800889	1.27317	1.09646	1.07725	1.00757	0.91518	1.12127	0.859842	1.65883	0.867097	1.37006	1.12751	1.23843	1.20583	1.30211	0.826831	1.29234
RASA3	0.541063	1.19333	0.491374	1.08683	1.14222	0.770947	1.07294	0.664081	1.21172	0.816432	0.818058	0.797449	0.739371	0.8365	0.69394	0.748521	0.708805
RASGEF1A	0.507441	1.38886	0.662573	1.16803	1.0188	0.813166	1.15049	0.735645	1.60003	0.572748	1.2904	1.01657	0.828259	0.678384	0.779844	0.6268	0.917102
RASGEF1B	0.340396	1.46566	0.437613	1.26486	0.932961	0.802177	1.4377	0.683256	1.6664	0.305706	0.698617	1.44663	1.00303	1.11148	0.961303	1.15553	0.917609
RASGEF1C	2.14245	0.771647	1.29149	1.32828	0.648489	1.02323	0.804474	1.63139	0.769522	2.11071	0.541031	0.575784	1.25618	1.57611	1.32582	1.57588	1.44219
RASGRF1	0.802554	1.00435	1.00774	1.30106	0.960702	0.738239	0.995493	1.34911	1.34814	0.977729	1.10431	0.864988	0.948589	0.868839	0.963577	0.877635	0.964465
RASGRP1	0.678775	0.838358	0.8435	0.98399	1.10216	0.913854	0.911925	0.739395	1.51306	0.609355	1.22994	0.489797	0.509347	0.422724	0.598059	1.02476	0.472902
RASGRP3	0.76837	0.958578	0.68141	0.976382	0.976634	1.04698	1.0128	0.775952	1.29714	0.916677	1.09791	0.810782	0.760194	0.729673	0.74342	1.30946	0.815344
RASGRP4	1.69393	1.62707	1.92903	1.48167	0.816085	0.702244	1.94037	2.49967	1.42905	0.8769	0.7073	1.37872	2.29773	1.97452	2.35876	2.3334	1.8787
RB1	1.19202	1.52339	1.50029	1.43484	0.517585	1.04758	1.68382	1.22626	2.24294	1.39149	1.87436	1.24149	1.28443	1.20417	1.37361	1.38389	1.3197
RBPJ	2.3472	1.43617	2.73747	1.70261	0.0153746	1.28202	1.98284	2.49508	1.7723	1.90089	2.23315	0.926096	1.64791	1.60419	1.79968	2.44843	1.34042
RBX1	0.490727	1.35623	0.898116	1.38806	0.806538	0.805399	1.39561	0.526596	1.49278	0.770378	1.74196	1.09284	0.963019	1.04168	0.973782	0.571356	0.987521
REL	1.84667	0.804809	1.94858	1.76004	0.514671	0.725292	1.06598	1.91632	1.0416	2.03838	0.922317	0.663605	1.71128	1.52115	2.38307	1.62401	1.07192
RELA	0.973536	0.831201	0.681254	1.30353	0.829818	0.866647	1.03588	1.01927	0.837867	0.806998	0.571633	0.63136	1.16964	1.46105	1.11999	1.2469	1.02584
RELB	1.18223	0.900042	0.733195	1.13531	1.15868	0.706015	1.14299	1.14189	0.875663	0.878969	0.727066	0.724986	1.57106	1.72666	1.24893	1.4211	1.08409
RET	2.23859	1.65053	3.26125	0.886751	1.18521	0.928036	2.16021	2.34709	1.92668	3.11447	0.78749	1.47843	1.1021	1.3337	1.27879	2.45405	1.11684
RFC2	0.430438	1.09609	0.658908	1.05296	1.06552	0.881527	1.32292	0.546521	1.57279	0.504974	1.48882	1.0245	1.00808	0.993052	0.955775	0.32304	0.813477
RFC3	0.498475	0.93098	0.536848	1.01045	1.25426	0.73529	1.20585	0.510362	0.821323	0.39257	0.608642	0.659235	1.47982	1.23858	1.22044	0.789034	0.995027
RFC4	1.57433	0.796288	0.945973	0.992905	1.16643	0.840668	0.951687	1.44324	0.852349	1.25468	0.842275	0.586359	1.31108	0.828135	1.03087	1.29613	0.661418
RFC5	0.525336	1.21387	0.620848	1.26439	0.866784	0.868827	1.15981	0.695807	1.25415	0.679578	1.37646	0.950831	1.06174	0.979979	1.09046	0.536001	0.949638
RFNG	1.26127	0.747327	0.888788	0.981271	1.20104	0.81769	1.19419	3.32727	0.637686	1.38495	0.484724	0.635726	1.5394	1.40873	1.46353	1.96268	1.30256
RGS1	0.39868	1.16002	0.584946	1.21313	0.965837	0.821032	1.02782	0.410003	1.08223	0.552125	1.24628	0.946173	0.707506	0.88706	0.812705	0.301707	0.664232
RGS10	0.765455	1.06028	0.887566	1.19453	0.884163	0.921309	0.966625	0.898723	0.892831	0.631096	1.17783	0.966659	1.06687	1.18096	1.19952	0.821914	1.06237
RGS11	1.12807	1.09179	1.32793	1.09044	1.1252	0.784356	1.38232	1.44515	0.739668	1.12131	0.399097	0.856509	1.15639	1.11664	1.13187	1.5431	1.06401
RGS12	0.900144	0.933069	0.735898	1.31202	1.01311	0.674867	0.892007	0.980855	0.809704	0.59969	0.839804	0.955056	1.1509	1.15934	1.55888	0.717829	1.09184
RGS13	0.47287	0.827042	0.908032	1.48032	0.322447	1.19723	0.127886	0.621263	0.0560115	0.350175	0.914898	0.989904	0.437502	0.259615	0.281378	0.562228	0.30947
RGS14	0.950765	0.636992	0.641434	1.0388	0.982831	0.978371	0.828138	0.952959	0.409583	0.938121	0.291032	0.579469	0.896299	0.85588	0.820109	1.44264	0.828323
RGS16	0.714355	1.42371	0.635563	1.36305	0.686125	0.950825	0.995132	0.611722	0.898626	0.677602	1.14807	1.52756	1.08126	0.966316	0.985886	0.839494	1.04917
RGS17	0.550613	1.11272	0.826809	1.509	0.294548	1.19646	0.761566	0.699122	0.686368	0.446108	1.13949	1.67676	0.897804	0.65885	0.714171	0.59319	0.963233
RGS18	0.456318	1.18582	0.792648	1.48624	0.247922	1.26583	0.415859	0.579221	1.00878	0.350284	1.36405	1.5414	0.681043	0.601494	0.614825	0.44391	0.710454
RGS19	0.70714	1.5854	1.06163	1.1336	0.521873	1.34452	1.01892	0.853538	0.996985	0.887723	1.37228	1.85704	1.08896	0.778204	1.03572	0.80111	1.05878
RGS2	0.903381	0.841599	0.672233	0.982806	1.08501	0.932186	0.529493	0.661858	0.713482	0.848568	0.956457	1.0082	0.664884	0.486249	0.563855	0.427996	0.906163
RGS20	1.78715	1.3182	1.18481	1.11213	0.852455	1.03542	1.17427	1.14162	1.22594	1.12779	1.22092	1.40948	1.53093	1.71652	1.75366	1.28399	1.64816
RGS21	0.790604	1.21674	1.0282	0.804023	0.217238	1.97874	0.842537	0.750989	0.862061	0.664587	1.31592	1.48519	1.04748	0.587451	0.827221	0.934542	0.945454
RGS22	0.992092	0.895469	0.61388	0.499702	0.952924	1.54737	0.888943	0.923616	0.588856	0.841821	0.526157	0.713022	1.00384	1.01073	0.859652	1.45842	0.898749
RGS3	1.22987	0.799286	1.22967	0.961948	0.753777	1.28427	0.648845	1.22747	0.570206	2.08899	0.561248	0.708546	1.40077	1.11709	1.79896	0.945115	1.02337
RGS4	1.7736	1.58095	2.60159	0.761055	1.04676	1.19219	1.49781	1.90816	1.58399	2.80899	1.15033	1.09762	0.837391	0.848283	0.922597	1.96004	0.965635
RGS5	0.603629	1.12696	0.548717	1.00451	0.782115	1.21338	1.09624	0.604612	0.665924	0.594567	0.481327	0.75556	0.759735	0.55922	0.675686	0.961772	0.6858
RGS6	0.917995	1.16661	1.25383	0.859562	0.929275	1.21116	1.19689	1.09489	1.15757	1.35024	0.691866	0.959014	0.95087	0.871311	0.801277	1.0574	0.908882
RGS7	0.83346	0.870047	1.16788	1.09453	1.14538	0.760086	0.740081	0.851435	0.969529	0.982666	1.48368	0.521766	0.747402	0.861676	0.8148	0.99438	0.721891
RGS8	1.00665	1.11194	1.6165	1.02903	1.21919	0.751775	0.878233	0.978237	1.52289	1.39396	2.35902	0.972552	0.955607	0.836112	0.810128	1.02914	0.983153
RGS9	0.930207	1.33731	0.884342	0.931651	1.17982	0.888525	1.14778	0.73991	1.98637	0.910063	2.5735	1.24226	1.12937	1.14853	1.11529	0.737048	1.27905
RHEB	0.987494	1.22231	1.06778	1.13486	1.21192	0.65322	1.01175	0.938593	1.50823	1.20457	2.26957	0.917103	1.01137	0.837644	1.02316	0.845497	0.924937
RHOA	0.712682	0.867424	0.929092	1.19588	1.2023	0.601827	0.703857	0.672282	1.05177	1.28549	1.71775	0.618335	0.724925	0.67067	0.79143	0.588234	0.745599
RHOB	0.599893	1.05457	1.03807	1.13325	1.29349	0.57326	0.799366	0.716277	1.18294	0.869255	1.83349	0.745144	0.986908	0.909243	0.989913	0.544559	0.999639
RHOC	0.611794	1.2906	2.04928	1.15807	1.21951	0.622426	0.64222	1.14231	2.29824	1.20209	4.3754	0.842195	1.12164	0.673411	0.809807	0.476339	1.0593
RHOD	0.781799	1.83007	1.20743	1.09603	1.06317	0.8408	1.1983	0.817637	2.47307	1.06577	3.52255	1.3727	1.19468	1.07839	1.16301	0.618625	1.43743
RHOG	0.612035	1.00446	0.755338	1.32973	1.25568	0.414587	0.743164	0.782546	1.08768	0.60575	1.30542	0.72677	1.33654	1.70566	1.25468	0.471459	1.13393
RHOH	0.537361	1.19524	0.730685	1.07549	1.44522	0.479291	0.830152	0.84111	1.63726	0.793203	1.66898	0.831512	0.493581	0.498273	0.530361	0.475225	0.712887
RICTOR	0.445558	1.43723	0.539578	1.19576	1.31621	0.488033	1.01276	0.30323	1.43273	0.360729	1.5818	0.98625	0.616155	0.690448	0.755254	0.321507	0.654728
RIN1	1.32302	0.739923	0.90372	1.31694	1.04058	0.642482	0.71719	1.05775	0.935729	1.78766	0.758961	0.689403	0.98924	1.13392	1.24885	0.878261	0.973164
RIPK1	0.750952	1.24069	0.524082	1.21583	1.13367	0.650503	1.14282	0.71834	1.06346	0.71441	0.618726	0.88028	1.36173	1.13851	1.09589	0.796511	1.22442
RIPK2	0.37132	1.41593	0.793436	0.880332	1.16342	0.956251	1.19272	0.533864	1.76637	0.487261	1.38428	1.14364	0.845291	0.851177	0.868575	0.423895	0.946171
RND2	1.23937	0.854658	0.724038	1.00424	1.13479	0.86097	0.906559	1.12624	0.808393	1.08199	0.493688	0.637152	1.29806	1.24386	1.28811	1.20624	1.0594
RND3	0.575141	1.43949	0.662741	1.04048	1.13743	0.822089	1.08588	0.611354	1.66142	0.597197	1.30958	0.959407	0.79823	0.836496	0.884857	0.524682	0.861694
RNF8	0.663053	1.68557	0.805926	1.38888	0.698161	0.912963	1.571	0.746338	1.97534	0.666588	1.49153	1.27752	1.17898	0.699122	1.12797	0.637921	1.04126
ROCK1	1.04193	1.40401	1.51973	1.05391	0.924014	1.02208	1.27589	1.20156	1.84143	1.16733	1.50272	1.19531	1.14162	0.999938	1.25558	1.21347	1.16179
ROCK2	2.78885	0.617369	3.02719	1.08372	1.03282	0.883459	0.926538	2.38257	0.366504	1.9311	0.257565	0.291726	1.22244	1.48573	1.37297	2.14972	1.40367
ROR1	1.36862	1.99112	1.90566	1.18711	0.836091	0.9768	2.02245	1.43857	2.66564	1.53062	2.32872	1.99988	1.2855	1.43106	1.29092	1.584	1.53818
ROS1	0.630192	1.48648	0.847334	1.12123	0.900764	0.978009	1.3388	0.62676	1.95797	0.694733	1.74704	1.16074	1.09965	0.970676	1.54993	0.871901	1.04466
RPA2	0.396122	1.03985	0.727378	0.863312	1.0978	1.03889	0.974119	0.54262	1.41527	0.624938	1.31922	0.753884	0.537507	0.621469	0.623179	0.267837	0.639608
RPA3	1.54049	0.749415	1.46909	1.82644	0.587866	0.585692	0.886343	1.33427	0.952393	3.32128	0.769687	0.637305	2.18495	1.21472	1.96483	1.01324	1.08097
RPS6	1.63105	0.448854	0.834856	1.34467	0.885378	0.769951	0.521826	2.11482	0.441008	5.42717	0.454866	0.369334	0.794077	0.65571	0.871351	1.40819	1.26596
RPS6KA1	1.38358	1.34562	1.09981	1.60218	0.571437	0.826383	1.66243	1.45448	1.78602	1.62069	1.68106	1.24819	1.93949	1.67778	1.78921	0.991136	1.87477
RPS6KA2	1.32737	1.22004	1.19449	1.50299	0.612914	0.8841	1.44751	1.06605	1.33467	1.1552	1.48882	1.20274	1.30886	1.59805	1.54358	0.981836	1.43817
RPS6KA3	1.16772	1.28495	1.32353	1.46591	0.671586	0.862505	1.63884	1.13363	1.34169	1.3223	1.78023	1.18517	0.915863	1.19921	0.949748	1.46238	0.87346
RPS6KA4	1.54282	1.21604	2.48029	1.47633	0.0209753	1.50269	2.80343	1.80583	3.86482	2.05651	3.90521	1.17457	0.808845	1.34422	0.533022	1.96354	0.667301
RPS6KA5	0.631832	0.900646	0.981954	1.2824	0.827663	0.889935	1.34635	0.583622	1.33717	0.812307	1.61104	0.852192	0.69666	0.871122	0.65021	0.880878	0.527914
RPS6KA6	0.96705	1.08485	1.31462	1.09605	0.943618	0.960332	1.34492	0.938036	1.36338	1.46724	1.50872	1.1144	0.723926	0.936833	0.699393	1.29065	0.767552
RPS6KB1	0.509443	1.19357	0.671114	1.47921	0.563923	0.956862	1.58026	0.510534	1.70701	0.935244	2.10725	1.03539	0.732696	0.795045	0.593233	0.377466	0.621807
RPS6KB2	0.680756	1.30128	0.755187	1.17802	0.985714	0.836267	1.49923	0.516821	1.81668	0.988033	1.98558	1.106	1.16475	1.17736	1.00166	0.551481	1.00107
RPS6KC1	1.51148	1.16769	1.04619	1.10936	1.02926	0.861382	1.41631	1.20464	1.32391	1.12953	1.37075	0.837718	1.91776	1.39354	1.41941	1.1449	1.25657
RPTOR	0.615028	0.801701	0.4922	0.82106	1.24671	0.93223	0.897561	0.547186	0.742327	0.599293	0.772588	0.556522	0.868837	0.767697	0.776786	0.715053	0.647339
RRAS	0.57444	1.12269	0.660437	1.44895	0.626564	0.924482	0.814859	0.733488	0.665556	0.620666	1.13958	1.01643	1.06043	1.24283	0.992743	0.581806	1.07588
RRAS2	0.908708	1.10124	0.587095	1.21107	0.966499	0.822429	0.958359	0.816861	0.89774	0.867163	1.05012	1.02414	1.03186	0.990176	1.02497	0.91262	1.00091
RRM1	0.888218	0.729738	0.653132	1.38063	1.14393	0.475441	0.751989	0.907101	0.534285	0.640116	0.63785	0.825484	1.43731	1.23352	2.14856	0.59083	1.2799
RRM2	0.605678	1.08609	0.665121	1.39772	0.571545	1.03074	0.771344	0.555362	0.715151	0.605434	1.1055	1.26045	0.923824	0.81164	0.872826	0.527333	0.98517
RSU1	1.30781	0.783372	0.838879	1.68259	0.930686	0.386725	0.917322	1.04044	0.541598	0.941718	0.362237	0.525039	1.19585	1.57859	1.1348	0.695534	1.73597
RXRA	0.996006	0.84924	0.77067	1.06247	1.08807	0.849458	0.819329	0.621069	0.506134	0.613552	0.635777	0.943379	1.47644	1.69707	2.00883	0.6215	1.25331
RXRB	0.437414	0.780727	0.260427	1.01789	0.801079	1.18103	0.478087	0.214102	0.346187	0.356055	0.628794	0.841229	1.14586	0.735498	1.16053	0.278002	0.89723
RXRG	2.11488	0.83738	1.26509	0.971424	0.950604	1.07797	0.857261	1.42617	0.690925	1.80821	0.667794	0.772609	2.07183	1.80754	1.97231	1.31718	1.41737
RYK	0.84559	1.56338	1.1887	0.882088	1.01481	1.1031	1.39181	1.11125	0.724694	0.949953	0.402193	1.20959	2.11722	1.34867	1.91199	1.42798	1.88291
RYR1	0.659293	0.931527	0.387149	0.714438	1.02096	1.2646	1.09119	0.742829	0.601944	0.541167	0.575426	0.779666	1.39052	1.28101	0.981767	0.854431	1.00908
RYR2	1.66582	2.25995	2.31422	0.558355	1.19569	1.24595	1.80062	1.82776	1.10037	1.81929	0.600351	1.68462	2.40177	1.75701	2.20114	2.03422	2.20673
RYR3	1.07833	1.29901	1.56753	1.00419	0.558236	1.43758	0.682645	1.14511	0.686445	1.07046	1.09979	1.21371	0.887618	0.402606	0.908171	1.15101	0.664908
SAR1A	1.09293	0.973399	1.27602	1.06666	1.23603	0.697309	0.905431	0.92565	1.34051	1.17985	2.00373	0.629016	0.6838	0.633016	0.582991	1.0796	0.669168
SAR1B	2.60018	1.68953	3.16555	0.955065	1.33073	0.714207	1.72386	2.55423	1.81653	2.9136	0.852702	1.60665	1.4088	1.27385	1.40215	2.97004	1.68222
SCN10A	0.720881	1.20936	0.875303	1.06592	1.04642	0.88766	1.03626	0.772587	1.60847	0.822139	2.17313	1.04251	0.976118	1.07139	0.943992	0.783412	1.09059
SCN11A	0.87591	1.30528	0.962855	1.32363	1.22445	0.451912	0.817953	0.839494	2.03188	0.71728	3.90905	0.755736	1.1648	1.34903	0.916715	0.892371	1.15455
SCN1A	0.82879	1.14511	0.72533	1.23114	1.19867	0.57019	1.00775	0.772118	1.61029	0.648928	2.39543	1.03061	1.45589	1.06226	1.00377	0.82501	1.32444
SCN1B	0.861595	0.753031	0.56445	0.89962	0.985202	1.11518	0.804498	0.944171	0.556118	0.70577	0.50669	0.641782	0.828498	0.661719	0.726918	1.18288	0.721403
SCN2A	3.07957	0.775936	2.57952	1.46884	1.10081	0.430348	0.668941	1.84824	0.887531	2.43681	1.0338	0.587083	1.24474	1.27472	1.89285	1.28735	1.01591
SCN3A	1.36422	1.08143	1.28983	1.26511	1.12441	0.610477	0.944872	1.42568	1.06916	1.11424	1.15127	0.772412	1.40464	1.18377	1.66506	1.32403	1.22468
SCN3B	0.604268	1.36737	1.00513	1.1081	1.29597	0.595933	1.00507	0.846488	1.68223	1.16849	2.00025	1.16046	0.92402	0.78393	0.78682	0.700129	1.0935
SCN4A	1.08432	1.37167	0.927582	1.00753	1.07999	0.912473	1.21506	1.03274	1.97056	1.16751	2.22837	1.35722	1.16839	1.12941	1.05503	0.969884	1.32232
SCN5A	0.795554	1.22943	0.963262	1.21986	1.19389	0.586251	0.984142	1.03681	1.37685	0.905754	1.36686	0.973547	1.09191	0.828974	1.17732	0.721056	1.03839
SCN7A	0.605435	1.38555	0.519126	0.927014	1.50221	0.570779	0.805322	0.417359	1.30872	0.511333	1.19908	0.953845	0.62536	0.60954	0.68875	0.598283	0.846659
SCN9A	0.983582	1.01556	0.919842	0.997315	1.12572	0.876969	1.10037	1.19569	0.653265	0.933214	0.350369	0.668528	1.24245	0.9161	1.07088	1.67348	1.12901
SCNN1A	0.476576	0.960826	0.645034	0.802458	1.28982	0.907726	0.873884	0.426906	1.74712	0.586769	1.56736	0.956953	0.833288	0.678577	0.583195	0.513287	0.965883
SCNN1B	0.863948	1.76853	1.12048	1.1699	0.868081	0.962017	1.54424	0.678221	2.05138	1.01551	1.72353	1.80704	1.50022	1.30331	1.10675	0.828754	1.58674
SCNN1D	1.29128	1.39909	1.36696	1.29618	0.692894	1.01093	1.54353	1.16696	1.31726	1.1495	0.756919	1.08466	1.59381	1.75146	1.47147	1.64588	1.40652
SCNN1G	1.78142	1.41012	2.73556	0.876667	1.20686	0.916475	1.60489	1.98377	1.78288	2.83308	0.814456	1.34277	0.923042	1.07392	1.07528	2.04577	1.13837
SEMA4G	1.1334	1.85059	1.74141	1.11475	1.20704	0.678219	1.86414	1.61891	1.89684	1.66211	0.730297	1.54977	1.37448	1.42246	1.38792	1.58508	1.36208
SEMA5A	0.980289	0.899054	0.921759	1.17791	1.06641	0.755679	1.0149	1.12896	0.638917	1.26466	0.329501	0.64669	1.05063	0.910824	0.953415	1.28175	0.779902
SFN	0.597541	1.71532	0.966959	1.05397	0.916257	1.02978	1.58892	0.86123	1.37514	1.00846	1.59966	1.51435	1.11369	0.911849	1.0335	0.734081	1.18805
SGK1	1.47879	1.33285	1.3736	1.08277	0.392355	1.52487	1.51787	1.05682	1.40857	1.36036	1.59153	1.3791	1.25177	1.00319	1.37638	0.961916	1.20963
SH2B1	0.732515	1.7306	0.699253	0.992652	0.813831	1.19352	1.64224	0.421989	2.02897	0.742557	2.08164	1.69652	0.887001	1.25792	0.936723	0.595362	1.15118
SH3RF1	0.793185	1.72028	0.746767	1.27262	0.651646	1.07573	1.83094	0.422334	2.05817	0.817203	2.38727	1.73582	1.07073	1.32461	1.13422	0.573975	1.34213
SHC1	1.44705	1.62862	1.87995	1.33779	0.538829	1.12338	1.95625	1.49564	1.62562	1.95428	2.19418	1.77646	1.09462	1.50087	1.11483	1.77783	1.45003
SHC2	1.94988	0.858042	2.05651	1.16106	0.789956	1.04898	0.996233	1.71913	0.662646	1.97583	0.418462	0.576326	1.35755	1.63312	1.6178	2.17844	1.37371
SHC3	1.67642	0.560468	1.2831	1.92369	0.543068	0.533242	0.792314	1.48474	0.553874	3.21392	0.573407	0.525332	1.84868	0.982448	1.22359	1.14679	0.6804
SIN3A	1.09759	1.23795	0.846481	1.50164	0.572962	0.925396	1.56481	1.07493	1.66386	1.25271	2.02908	1.31145	1.52065	1.67475	1.39652	0.84663	1.07209
SIRPA	1.9417	0.952643	0.991471	1.25715	0.786992	0.955855	1.2135	1.27675	0.910545	1.16806	0.649296	0.749622	1.63893	1.96457	1.78514	1.3807	1.54221
SIRT2	0.918746	0.685865	0.750158	1.46211	0.622071	0.915823	0.850073	0.893006	0.832117	1.50564	0.789116	0.695771	0.897996	1.19815	1.2038	0.768477	0.886842
SKI	0.599195	1.107	1.0839	1.48007	0.510181	1.00975	1.78357	0.790532	0.874361	1.03615	1.7384	1.27964	0.837664	1.14824	0.832288	0.657396	0.776833
SKIL	0.767352	1.12909	0.900681	1.2665	1.04465	0.688853	1.56039	1.02889	1.10582	2.62482	1.3259	1.074	1.41616	1.17772	1.22201	1.24203	1.01048
SLC22A2	0.551546	1.25079	1.10781	1.51741	0.470115	1.01247	1.58524	0.612044	1.32705	0.631496	1.9578	1.24152	0.718391	0.887907	0.686406	0.6432	0.69894
SLC2A4	0.664264	1.52618	1.17504	1.53249	0.726227	0.741282	1.59567	0.901774	1.69652	0.874611	2.07599	1.15297	0.855237	0.983935	0.833902	0.799194	0.769792
SMAD1	0.869432	1.08489	0.532804	1.12784	1.01496	0.857204	1.25362	0.677039	0.979227	1.03702	0.915994	1.02307	1.31239	1.26792	1.48952	0.749456	1.61396
SMAD2	1.00513	0.549526	0.962029	1.96461	0.561324	0.474069	0.523973	1.07429	0.477992	1.67395	0.523646	0.494147	1.2007	1.20116	1.56081	0.898689	1.53976
SMAD3	1.12396	0.962942	0.617922	1.46269	0.978463	0.558849	0.901732	0.637377	0.765641	0.640638	0.879613	0.785705	1.73445	1.09582	2.03391	0.730759	1.14708
SMAD4	0.409256	0.940466	0.506272	1.40338	0.42082	1.1758	0.662083	0.364653	0.786864	0.389409	1.24099	1.07455	0.718368	0.536419	0.62078	0.341915	0.875079
SMAD5	1.57439	0.44614	1.27297	0.830835	1.27062	0.898544	0.453602	1.11413	0.338586	1.14835	0.393187	0.474515	0.781247	1.21137	0.869285	0.882296	0.939594
SMAD6	1.75909	1.25603	1.93652	1.03355	1.00755	0.958899	1.55777	1.56474	1.05643	2.47363	0.571417	0.927843	1.15276	1.24027	1.2156	1.76342	1.08129
SMAD9	0.160534	0.50065	0.357018	0.545752	1.75742	0.696824	0.355053	0.220415	0.46653	0.199915	0.622205	0.506826	0.382113	0.279768	0.349157	0.134929	0.377499
SMARCA1	0.433531	1.3141	0.732816	1.28181	0.621661	1.09653	0.824926	0.479109	1.02096	0.778223	1.41695	1.29839	0.970273	0.684644	0.897561	0.41233	0.970177
SMARCA2	1.97734	1.29808	1.44655	1.30538	0.898262	0.796355	0.960261	1.69097	0.775601	1.15115	0.986333	1.16438	2.14131	1.62289	1.91961	1.31612	1.71824
SMARCA4	0.558717	0.844916	0.698233	1.23053	0.718019	1.05145	0.698171	0.539432	0.848035	0.609074	1.32272	1.30227	0.952923	0.766633	0.731709	0.42341	0.902959
SMARCA5	1.02296	0.654008	1.73567	0.422433	1.51216	1.06541	0.852838	1.50999	0.340825	1.39237	0.2184	0.561501	1.64613	1.45526	1.73783	1.77915	1.87721
SMARCAD1	0.96771	1.32755	1.50692	1.53313	0.718801	0.748073	1.03347	1.24582	1.00472	1.2407	1.49148	1.76418	1.32705	0.740405	0.891664	1.30462	1.29405
SMARCAL1	1.2079	1.07085	0.847931	1.05586	1.16855	0.775596	1.0875	1.22685	1.34559	0.931362	1.63034	0.849671	1.48186	1.3485	1.87613	0.980031	1.50758
SMARCB1	1.01012	1.17894	1.03676	1.05177	1.16338	0.784848	1.04306	0.836806	1.35951	0.9548	1.85926	1.00444	1.14214	1.05888	0.973407	0.777102	1.18902
SMARCC1	1.08755	0.543007	1.21632	1.52356	0.819353	0.657086	0.538599	0.968218	0.680975	2.04108	0.925642	0.373721	0.657909	0.657126	0.602668	0.712391	0.589444
SMARCC2	1.91124	0.8787	1.34547	0.998403	0.858534	1.14306	0.994893	1.70837	0.54995	2.07324	0.449452	0.57138	1.39265	1.32224	1.24275	1.49094	1.42398
SMARCD1	1.0612	1.11823	1.49415	1.09743	1.17186	0.730711	1.07792	1.1399	1.34258	1.05289	1.78366	1.02925	1.03318	1.05117	0.953918	1.11579	1.13502
SMARCD2	1.25541	0.997091	1.26991	1.15979	1.12842	0.711789	0.814646	1.39076	1.30219	1.04609	1.76538	0.949561	1.07081	1.25915	1.11161	1.09083	1.19903
SMARCD3	1.29357	0.999057	1.10862	1.17533	0.880831	0.943841	1.14246	1.43777	0.905749	1.42621	0.634328	0.691653	0.989695	0.986675	0.89969	2.40955	0.77316
SMARCE1	2.10858	1.10967	1.29646	1.03747	1.12864	0.833887	1.07546	1.3202	1.05385	1.13077	1.0588	0.880837	0.982709	0.936815	0.933616	4.01523	0.926393
SMC3	1.64787	0.832744	2.39529	1.21391	1.4484	0.337684	0.682951	1.69777	0.932166	1.78195	1.03146	0.787001	0.991607	0.872309	0.839952	1.58002	1.00288
SMO	1.26756	0.764904	1.08094	1.53413	0.881322	0.584545	0.778245	1.36133	0.845999	2.92447	0.684143	0.676118	1.04789	0.943099	1.00449	1.00009	0.864311
SMPD1	0.69327	1.35312	1.16688	1.56293	1.14606	0.291003	1.17974	0.925806	1.94142	0.60242	1.71971	1.2037	1.65309	1.2937	1.62439	0.573858	1.56397
SMPD2	0.518347	1.23404	1.04603	1.01249	1.26795	0.719563	0.867937	0.650595	1.39657	0.665471	1.17028	1.15769	0.758166	0.668044	0.667575	0.423777	1.02859
SMPD3	1.10895	2.29859	1.40444	1.07706	1.10187	0.821072	1.7662	0.99641	2.02798	1.1286	2.01686	1.96748	1.32361	1.05588	1.26705	0.828686	1.61906
SMURF1	0.767712	1.96501	0.859045	1.05751	1.2209	0.721593	1.49494	0.663868	2.28254	0.948486	1.96419	1.83781	1.06829	1.15648	1.10486	0.581065	1.39345
SMURF2	0.0464624	3.43395	0.552211	1.58585	0.51156	0.90259	1.67742	0.374574	4.15837	0.503632	3.12066	3.0181	0.686987	1.12262	1.37776	0.0467783	1.82808
SNAI1	0.429392	1.63756	0.904227	1.07271	1.2923	0.634994	1.41805	0.565869	1.34103	0.744354	1.31585	1.6412	0.648421	0.810744	0.691757	0.454208	1.09914
SNAI2	0.984776	1.53245	1.13707	1.13546	1.01893	0.845605	1.38336	1.07279	1.74023	0.826622	1.35906	1.51375	1.51774	1.25085	1.54248	0.797617	1.49636
SNW1	0.437449	1.00438	0.295844	1.55841	0.706223	0.735366	1.0324	0.448208	0.940658	0.776377	0.510705	0.768488	1.97495	2.11279	1.8153	0.395281	1.45623
SOCS1	1.19432	1.70899	0.857767	1.16682	0.956496	0.876684	1.57459	0.950183	1.39013	1.13598	1.27367	1.88857	1.56546	1.30071	1.5235	0.780079	1.63419
SOCS2	0.714651	0.799692	0.567198	1.35448	0.936301	0.709219	0.822536	0.819109	0.868836	0.797668	0.726015	0.788354	0.886493	0.764382	0.917232	0.576562	0.742035
SOCS3	1.50669	0.974942	0.955224	1.21166	0.921549	0.866787	1.02196	1.28361	1.1015	1.628	0.872806	0.922818	1.01903	1.04923	1.12226	1.21512	0.934476
SOCS4	0.543836	1.80441	0.989008	1.13938	0.891617	0.969002	1.97197	0.716142	1.40577	0.791554	2.1606	2.25245	0.916904	0.902583	0.833493	0.409368	1.45787
SOCS5	1.57579	2.50967	1.97209	1.41173	0.761893	0.826376	2.33123	1.19348	2.17645	2.43604	2.69912	2.95587	1.42425	1.58445	1.38711	1.54472	1.97082
SOS1	0.671348	1.70212	0.629091	1.42122	0.626919	0.951864	1.75394	0.734994	0.799256	0.577242	1.667	1.78812	1.3945	1.49278	1.34979	0.4797	1.46333
SOS2	0.940545	1.78246	0.767947	1.17321	0.546572	1.28022	2.18712	0.719348	1.31761	0.929121	2.09877	2.22569	1.46327	1.38471	1.32483	0.878014	1.74899
SP1	1.00692	1.84812	0.620982	1.14669	0.634625	1.21868	1.90983	0.772947	1.60211	0.536803	1.99508	2.04434	1.24834	1.57889	1.09861	1.56829	1.29328
SPIRE1	0.633457	1.29003	1.23552	1.14035	0.489991	1.36966	1.69346	0.737235	0.479028	2.02135	1.77497	1.61835	0.696194	0.856002	0.678165	0.399181	1.04262
SPIRE2	1.3836	0.75484	0.886606	1.59622	0.698672	0.705109	0.904265	1.12255	0.390038	1.02714	0.642699	0.788842	1.90951	1.54084	1.89887	0.756552	1.33516
SPOCK1	1.37294	1.74478	1.13174	1.21213	0.768679	1.01919	1.94991	1.525	1.50564	0.898005	1.81133	1.76202	1.63079	1.97626	1.65588	1.08375	1.69345
SPOCK2	0.659277	1.60283	0.998141	1.55159	0.100946	1.34746	2.26587	0.749638	1.11943	0.755201	2.35517	2.04359	1.05589	1.599	1.15793	0.52472	1.57132
SPOCK3	0.586192	1.42485	1.00905	1.05176	1.01305	0.935191	1.58069	0.668952	1.48721	0.650691	2.11715	1.70223	0.705046	1.12053	0.816588	0.562127	0.988792
SPON1	1.86491	1.42852	1.33048	1.36166	0.822307	0.816034	1.61866	1.32643	1.1292	1.11341	1.93562	1.47825	0.981151	1.62771	0.938982	2.71068	0.930901
SPON2	0.618415	1.04214	0.9699	1.00532	1.11348	0.881204	1.45269	0.718309	1.2538	0.875234	1.74646	1.37845	0.713471	1.05231	0.689263	0.752537	0.891143
SPP1	0.784914	0.464992	0.699106	0.88823	0.881435	1.23034	0.557907	0.840349	0.33549	0.864573	0.268269	0.334342	0.732913	0.714906	0.747533	0.926282	0.666199
SRA1	0.6974	1.22499	0.895843	1.24719	0.869536	0.883275	1.49823	0.692301	0.84444	0.825767	1.62967	1.33293	0.630439	0.919662	0.71107	0.94832	0.690153
SRC	1.5608	1.16059	1.3236	1.39023	0.836135	0.773635	1.62925	1.27797	0.909541	1.02943	1.50447	1.32446	1.54029	1.72898	1.39633	1.37487	1.21891
SRF	1.24043	1.35228	1.80503	1.59822	0.655349	0.746433	1.47389	1.23147	1.46618	1.65149	1.80432	1.10253	0.884278	0.887418	0.900352	1.26163	0.76231
STAT1	1.08639	0.443516	0.694736	1.41082	0.997199	0.591977	0.555277	0.859272	0.379596	1.53469	0.389883	0.341729	1.18904	1.03899	1.16858	0.913747	0.9804
STAT2	1.10537	0.833526	1.1394	1.25079	0.943556	0.805652	0.971483	0.994177	0.801248	0.839726	1.0592	0.618141	1.21658	1.10649	1.62484	0.807157	0.990782
STAT3	1.6447	1.03337	1.47876	1.3594	0.680109	0.960488	0.893498	1.49089	0.881427	1.71255	1.41152	0.606144	0.95491	0.739698	1.05124	1.14631	0.657924
STAT4	0.497942	1.24097	0.938187	1.43499	0.580702	0.984304	0.908994	0.58405	0.918295	0.658208	1.56899	0.848593	0.781487	0.739036	0.809799	0.370834	0.754435
STAT5A	1.72549	0.973812	1.04093	1.54675	0.909275	0.543977	0.957503	1.05576	0.607029	1.25708	0.784482	0.725621	2.95861	1.48587	2.55334	1.00756	1.82421
STAT5B	0.8301	1.22894	0.959517	1.30802	0.823962	0.868021	1.10566	0.758003	0.846449	0.941674	1.16831	1.00545	1.23868	1.08311	1.45571	0.512582	1.26877
STAT6	0.774897	0.643415	0.601071	1.28111	1.14485	0.57404	0.918901	0.928358	0.351183	0.673398	0.365888	0.456555	1.81776	1.62119	1.58618	0.717646	1.25162
STK11	0.919703	1.05499	0.682332	1.564	1.01317	0.422826	0.933578	0.971198	0.864634	4.1346	1.01159	0.933011	1.67281	0.973806	1.69514	0.601541	1.02137
STK36	0.426014	1.09348	0.889986	1.70779	0.332105	0.960108	0.659502	0.786077	0.792346	7.67905	1.46516	1.19587	1.06206	0.661265	0.777723	0.358204	1.07709
STUB1	1.2384	0.768395	1.26241	1.41784	0.88463	0.697531	0.688148	1.79035	0.649139	2.79255	0.715358	0.733644	1.12231	1.05277	1.3799	1.21984	1.12299
SUFU	1.20559	1.14688	1.01859	1.61721	0.747127	0.635663	1.09513	1.02173	1.19187	1.17506	1.46422	1.51006	1.51604	1.13506	1.28547	1.01117	1.3686
SUMO1	0.450235	1.05171	0.447915	1.12849	1.32988	0.541624	0.72177	0.462433	0.730412	1.10406	1.03962	1.40226	0.944799	0.683369	0.770896	0.349872	0.928276
SYK	1.59616	1.41256	1.23641	1.56402	0.854564	0.581418	1.06997	1.4437	0.970449	1.4633	1.01703	1.49699	1.92901	1.57708	1.84028	1.22734	1.62334
TAB1	2.43726	1.14643	2.80453	0.856281	1.00374	1.13998	1.39941	2.2321	1.27741	3.51129	0.667402	0.936002	0.989043	1.22692	1.20451	2.5154	1.27084
TAB2	0.366436	1.02986	0.587444	1.24563	1.13352	0.620852	1.01478	0.715802	1.2948	0.592155	1.65825	0.833472	0.718706	0.667957	0.578308	0.362918	0.710183
TAF1	1.16043	1.15279	0.73019	1.19525	0.737236	1.06752	1.28847	1.06141	0.759034	0.733596	0.605428	0.779752	1.60103	1.30824	1.33502	1.86188	1.26579
TAF10	1.01581	1.06386	0.869385	1.00921	1.12054	0.870243	0.988634	0.805806	1.31918	0.732685	1.64183	1.06585	1.17055	1.3396	1.107	0.721867	1.35244
TAF11	3.75861	0.506543	3.2571	1.19463	1.23915	0.566225	0.493307	2.46472	0.435558	1.9837	0.50632	0.396458	2.14398	2.13302	2.01022	2.44458	2.65353
TAF13	1.37301	0.671306	1.25292	1.50977	0.91823	0.571998	0.718864	1.63611	0.72434	2.24927	0.659777	0.556033	0.958289	0.806898	1.1838	1.1612	0.819549
TAF15	1.78785	1.29755	1.52411	1.31261	1.04994	0.637451	1.1202	1.91333	1.77978	2.45456	1.76819	1.19863	1.15925	1.12269	1.29125	1.41779	1.2504
TAF1L	1.27323	1.49838	1.54934	1.25421	1.08682	0.658965	0.956665	1.36891	1.31074	1.37705	1.34265	1.17596	1.20671	0.982591	1.27111	1.18072	1.34803
TAF2	1.31735	1.40989	1.37971	1.09315	1.27216	0.634691	1.15895	1.17825	1.89495	1.76081	1.90624	1.48898	0.937991	1.08368	0.97788	1.28212	1.43071
TAF4	0.902251	1.48749	0.899874	1.08435	1.15445	0.761198	1.16758	0.910624	1.70722	0.825884	1.62322	1.34226	0.933882	1.04404	0.945459	0.8826	1.37598
TAF5	1.44706	1.25856	1.78224	0.98966	1.21906	0.791279	0.812415	1.31595	0.826629	1.7495	1.01207	1.12639	0.431828	0.466777	0.570642	2.33262	1.01062
TAF5L	1.26432	1.26285	1.60731	0.912941	1.41801	0.669049	0.942411	1.15987	0.986872	1.51906	0.897803	1.28229	0.722788	0.730443	0.758021	1.22372	1.09569
TAF6	1.235	1.15249	1.04838	1.05521	1.27544	0.66935	1.22796	1.11756	1.31034	0.96684	1.02306	1.28669	1.563	1.35218	2.01685	1.02566	1.69191
TAF6L	0.619635	1.45549	0.904237	0.908144	1.38966	0.702194	1.12273	0.508597	1.61899	0.751982	1.5456	1.29435	0.785656	0.96368	0.761151	0.551757	1.1513
TAF7	1.25718	0.652272	0.861658	1.23665	0.914647	0.848699	0.730361	0.929867	0.600055	1.60472	0.448101	0.624236	0.863474	0.927501	1.09643	0.987323	0.800492
TAF7L	0.698489	2.0312	0.863384	1.25539	1.01078	0.73383	1.70332	0.604884	2.40183	0.97332	2.34172	2.27377	1.05581	1.40974	0.942588	1.51161	1.76825
TAF9	0.41478	1.09719	0.395563	1.16886	1.05294	0.778198	1.21463	0.480565	1.21545	0.395074	0.643109	0.968973	0.928082	0.934616	0.662225	0.88959	0.671453
TAF9B	0.563811	2.24728	1.10582	1.39483	0.592803	1.01236	1.58837	0.690644	0.575805	0.974734	1.41247	2.53741	0.769223	0.746426	0.908805	0.411638	1.92723
TAOK2	1.15243	1.27124	0.902677	1.39845	0.819586	0.781962	1.3694	1.52528	1.5106	1.45391	1.32589	1.43225	1.02239	0.998065	0.93626	0.997012	1.04824
TAT	1.12997	2.05671	1.22747	1.4027	0.741189	0.856111	1.98109	1.06684	1.90796	1.25614	2.12328	2.44481	1.26036	1.45133	1.34698	1.10887	1.72838
TBP	1.85528	1.58505	2.17869	1.12451	0.863886	1.01161	1.83713	1.55312	1.18755	2.45202	1.91058	1.97853	0.977173	1.08164	0.961511	1.68632	1.40791
TBRG1	0.796897	1.20413	0.732197	1.31278	1.01096	0.676265	1.27983	0.687613	0.648983	0.885075	1.12581	1.2236	1.02025	1.00639	0.839487	0.77023	0.963446
TCEB2	1.22657	1.15484	0.589763	1.22933	0.671775	1.09889	1.34115	1.05715	0.911878	0.979355	0.87184	1.02996	1.42595	1.30514	1.05314	1.57167	1.05911
TCF12	1.35696	1.49431	1.64714	1.39789	0.439851	1.16226	1.58573	1.33987	0.539517	1.22975	2.18376	1.81493	0.662976	0.972124	0.77627	1.0438	1.00456
TCF15	1.28746	1.49743	0.965386	1.16138	0.719199	1.11942	1.676	1.1296	1.03336	1.33778	1.56384	1.66393	0.974533	1.14987	0.963642	1.71659	1.25311
TCF19	1.67568	0.774528	1.85075	0.918757	0.867479	1.21376	1.03585	1.73772	0.602836	2.0212	0.412978	0.585457	0.851286	0.923609	0.947554	1.91575	0.862402
TCF20	1.14257	0.709571	0.931759	1.22919	0.893741	0.877064	0.818614	1.02467	0.507674	1.0964	0.429824	0.568675	1.10078	0.988268	1.16217	1.20561	0.944663
TCF21	1.54563	0.976449	1.35544	1.32174	0.956886	0.721373	1.22929	1.46334	0.669496	1.35502	0.722118	1.01835	1.96324	1.44727	1.36415	1.64334	1.15628
TCF23	1.62582	1.13401	2.409	0.815448	1.16537	1.01919	1.43224	1.84008	0.970235	2.6733	0.647739	1.07904	0.775049	1.03384	0.974213	1.7318	0.906834
TCF3	1.39083	1.4445	1.84594	1.34842	0.731248	0.920336	1.77938	1.31073	0.964987	1.87766	1.9509	1.90771	0.8506	1.21417	0.967078	1.32286	1.23976
TCF4	2.27549	0.498053	1.94402	2.0732	0.427028	0.499768	0.66109	1.52005	0.424981	2.86025	0.684752	0.629261	1.51836	1.28972	0.919585	1.94661	0.579658
TCF7	1.27631	0.732209	1.17037	1.15072	0.86295	0.986329	1.04841	1.28083	0.539373	2.09858	0.345062	0.661435	1.48012	1.09833	1.47171	1.21073	1.23973
TCF7L1	1.10562	1.31452	1.25281	1.35375	0.866877	0.779372	1.55717	1.00148	0.877086	1.46514	1.79299	1.67266	0.992582	1.12681	0.979466	1.21068	0.96355
TCF7L2	2.0299	1.38825	3.4962	1.49449	0.664773	0.840738	1.39739	2.18974	1.60819	2.66669	2.61587	1.91786	0.647896	1.13052	0.637554	2.10293	1.00546
TCP1	0.668642	0.501775	0.387585	1.10194	0.99726	0.900803	0.587327	0.53417	0.356546	0.671488	0.416865	0.413169	0.719509	0.653503	0.546543	0.921484	0.411386
TDGF1	0.280378	0.663796	0.456081	0.818802	1.62916	0.55204	0.560694	0.26294	0.310966	0.299551	0.926249	0.557732	0.27465	0.353259	0.271097	0.223149	0.276421
TEAD1	1.11417	0.653832	0.621815	1.23106	0.870055	0.898888	0.780717	0.792748	0.52643	0.889596	0.623204	0.537521	1.24081	0.833488	0.967921	0.811044	0.671838
TEK	0.305394	1.17771	0.981503	1.33047	0.606315	1.06322	1.08877	0.536794	0.604421	0.422392	1.25759	0.782133	0.843202	0.763597	1.0415	0.291521	0.698516
TESK1	0.584089	1.32884	0.605216	1.359	0.801575	0.839426	1.10209	0.516715	1.14255	0.639984	1.44891	0.86572	1.11099	1.07005	0.972444	0.438047	0.976082
TFAM	0.493723	0.985151	0.575791	1.61008	0.397034	0.992886	1.02449	0.556792	0.999799	0.55902	1.48276	0.788847	0.93017	0.800101	0.843961	0.393582	0.803668
TGFA	0.440272	1.42335	0.674842	1.9011	0.250167	0.848729	0.921056	0.787863	0.855189	0.608562	1.50926	1.07191	1.56565	1.09966	1.4432	0.405295	1.27782
TGFB1	1.64476	1.57297	1.29167	1.73492	0.598423	0.666653	1.24096	1.41343	1.15628	1.29214	1.69705	1.46784	1.52827	1.29274	1.54625	1.18851	1.56726
TGFB1I1	1.63653	1.48272	0.812262	1.50496	0.643127	0.851908	1.07536	0.900569	1.02676	0.820859	1.38877	1.26139	1.8096	1.77536	1.59623	1.42974	1.628
TGFB2	1.10857	1.47661	2.08433	1.46355	0.681112	0.855336	1.13361	1.33055	1.19282	1.15418	1.71073	1.6493	1.33346	1.04959	1.02642	1.38646	1.28241
TGFB3	1.42823	1.17041	0.994815	1.21699	0.755881	1.02713	0.980464	1.08868	0.825521	0.777213	1.07932	1.23536	1.57044	1.49423	1.17558	1.21665	1.25241
TGFBR1	0.547304	1.09587	0.518941	0.835882	0.933771	1.23035	1.03504	0.569492	0.894209	0.398376	0.988893	1.14151	1.06073	0.796716	0.791702	0.458586	0.887554
TGFBR2	0.490687	1.2909	0.59437	1.29256	0.54967	1.15777	0.715158	0.444474	1.13599	0.636608	1.52884	1.52277	1.05192	0.738847	0.782122	0.499617	0.876351
TGFBR3	0.564823	1.69479	1.02017	1.55635	0.357656	1.086	0.607197	0.605824	0.781499	0.728037	1.35659	2.0199	1.61686	0.84088	1.26464	0.439201	1.4211
THEM4	1.09601	2.00749	1.23857	1.75344	0.828564	0.418	1.07634	0.983652	1.80508	1.46436	2.31962	2.4036	1.54378	1.14251	1.26555	1.11935	1.4791
THPO	2.91956	1.14038	3.00497	0.850031	0.871326	1.27864	1.19988	3.3091	0.704469	1.25973	0.554663	1.21036	2.30348	2.37398	1.60359	4.18559	2.06339
TIA1	1.64952	0.486983	1.14433	1.34512	0.979388	0.675487	0.546491	1.02181	0.495497	1.39784	0.676983	0.430788	0.737926	0.716457	0.627957	0.868503	0.699952
TIAM1	1.67778	0.9575	1.58162	1.27522	1.1182	0.606581	0.920468	2.49252	0.961177	1.49431	1.08206	0.83577	1.32173	1.48058	1.48697	2.33415	1.39688
TIE1	1.8194	1.85966	2.67117	0.960192	1.00173	1.03808	1.93506	1.95288	1.89568	3.19938	1.43081	1.69086	1.10254	1.02248	1.2414	1.89656	1.39846
TIMP1	1.29203	1.39212	1.49246	1.02474	1.25096	0.724297	1.27442	1.13253	1.53112	1.70317	1.7782	1.43024	1.02781	0.986578	0.912824	1.29172	1.11873
TIMP2	1.75123	1.05276	1.36785	1.10448	1.28057	0.614944	1.19245	1.16845	1.47871	1.3832	1.65563	1.31558	1.25319	1.13213	1.08138	1.38488	1.33487
TIMP3	0.564705	0.985198	0.957193	1.17787	1.35298	0.469145	0.991276	0.554134	1.22013	0.677334	1.41228	1.29151	0.973784	0.884869	0.827711	0.471486	1.43685
TIMP4	0.583633	1.08936	0.557458	1.1955	1.3794	0.425097	1.09212	0.493181	1.07623	0.611857	1.11014	1.3468	0.879869	0.874038	0.876607	0.774693	1.32319
TIRAP	1.19881	0.547566	0.899873	1.91181	0.714328	0.373863	0.650803	0.766851	0.610562	2.05448	0.506178	0.584052	1.29035	1.1692	1.22649	0.562997	0.724228
TLE1	1.15446	1.30393	1.12856	1.26009	1.18857	0.551339	1.33166	1.37295	1.58586	1.14742	1.38336	1.26511	1.29134	0.978411	1.34573	0.834562	1.25874
TLE2	1.97724	1.20775	1.12556	1.4085	1.00825	0.583243	1.29323	1.61962	1.01702	1.48689	0.772718	1.04045	1.93535	1.79285	2.32652	1.25527	1.87647
TLE3	1.22091	1.26545	1.02905	1.14713	1.17376	0.679115	1.18978	1.17911	1.09616	1.12867	1.02936	1.34454	1.17116	1.26864	1.32057	0.884578	1.51929
TLN1	1.15671	1.48615	0.786631	1.20105	1.13745	0.661502	1.61151	1.1477	1.4449	0.62323	0.945149	1.40657	1.5737	1.83711	1.42936	1.10384	1.37751
TLN2	0.952682	0.884482	1.28856	1.33311	1.63889	0.0280037	0.97994	1.11406	1.40404	1.15865	1.45403	1.42658	1.14897	1.46832	1.23414	0.702293	1.52396
TLR1	1.98252	1.26366	2.6829	1.2313	1.62748	0.141221	1.02829	1.85962	1.63572	2.35694	1.78403	1.57357	0.421582	0.832473	0.474328	1.67807	1.21199
TLR10	0.920144	1.24599	1.05106	1.26284	1.15714	0.580015	1.10668	1.37689	1.36202	1.12974	1.30542	1.31256	1.19073	1.12197	1.45462	0.770698	1.30988
TLR2	0.619132	1.18826	0.848428	1.2198	1.46341	0.316789	1.28928	0.701472	0.667191	0.699152	1.31558	2.01705	0.848108	0.838191	0.882764	0.610812	1.60703
TLR4	0.552609	1.75927	1.2042	1.0454	1.25714	0.697461	1.35032	0.75189	1.22092	1.00593	1.74847	2.16428	0.578301	0.864266	0.735406	0.650054	1.48853
TLR5	1.6324	1.49658	2.68166	0.969405	1.35648	0.674115	1.24345	1.72706	1.08834	2.03203	1.56988	1.96889	0.607294	0.820349	0.847624	1.47849	1.4759
TLR6	0.370541	1.34	0.752123	0.919663	1.44197	0.638369	1.35453	0.630898	0.877799	0.636504	1.59853	1.69471	0.685555	0.540552	0.567653	0.433228	0.85906
TLR7	0.248382	1.1121	0.537965	0.995643	1.31864	0.685719	1.20501	0.371913	1.07146	0.409369	1.61048	1.79091	0.596933	0.801049	0.629209	0.25169	1.10881
TLR8	1.69452	0.800486	1.05953	1.17559	0.733107	1.09131	1.23083	1.37768	0.81093	1.84518	0.51983	0.791998	1.31026	0.671067	0.924654	1.65154	0.632039
TLR9	1.77301	1.46105	2.71645	1.23136	0.872463	0.896178	1.8525	2.07349	1.12875	2.04055	0.621218	1.75157	1.70154	1.36975	1.82863	2.30799	1.59856
TMSB4X	1.24265	0.529044	1.53272	1.09653	1.14315	0.760323	0.528466	1.40146	0.288119	1.81468	0.707119	0.769088	0.699788	0.652609	0.867992	1.42028	0.923432
TMSB4Y	0.855965	2.83841	1.15892	1.60003	0.567322	0.832649	2.59192	0.737245	0.654764	1.16807	2.7792	2.9106	1.624	1.4369	1.66071	0.668055	2.02446
TNC	0.769375	1.55804	0.52342	1.26554	0.61241	1.12205	1.71879	0.604434	1.15634	0.842668	1.44335	1.49722	1.06925	1.15519	1.08687	0.791668	1.16414
TNF	0.795755	1.56257	1.40701	1.21166	0.56361	1.22473	1.84587	0.962736	1.0913	0.894849	2.52431	2.13962	1.07919	1.27272	1.20325	0.655291	1.44516
TNFAIP6	0.838813	0.998824	1.02668	1.2261	0.658484	1.11542	1.59381	1.28259	0.791865	0.829371	1.84417	1.7268	0.904899	1.07725	0.861438	0.778042	1.08089
TNFRSF10A	0.440755	1.06847	0.648868	1.0128	0.842641	1.14456	1.68801	0.491262	0.397123	0.330233	1.52402	1.77522	0.935582	0.972561	0.990974	0.335342	1.19648
TNFRSF10B	1.69673	0.651618	0.948529	1.29503	0.832858	0.872113	0.793803	1.17383	0.443341	1.95627	0.36472	0.561265	1.93492	1.1391	1.80877	1.06491	1.3269
TNFRSF10C	1.03284	1.92965	1.28862	1.29497	0.647947	1.05708	2.12222	0.962863	1.08071	1.17362	2.42693	2.46671	1.09034	1.33169	1.34624	0.916228	1.42019
TNFRSF10D	0.916305	1.56688	1.27311	1.61174	0.460819	0.927441	2.22658	0.842566	1.76906	0.781899	3.19279	2.40443	0.734192	1.62185	0.773499	0.866349	1.00184
TNFRSF11A	0.661486	1.54976	1.1903	1.44511	0.842073	0.712813	1.60439	0.806061	0.955263	0.825831	2.01278	1.90924	0.952753	1.3257	1.06283	0.674733	1.04284
TNFRSF12A	1.1415	1.11667	0.868542	1.22083	0.952529	0.826644	1.32311	0.883008	0.703566	1.03921	1.03315	1.13518	0.968069	0.98283	0.710262	1.32931	0.75054
TNFRSF13B	1.65365	1.25837	1.49636	1.24353	0.873284	0.883187	1.41085	1.62788	0.809188	1.12018	1.65469	1.48089	1.00481	1.11208	0.869338	3.23288	0.901404
TNFRSF13C	1.27199	1.19582	1.58389	1.013	1.03051	0.956489	1.298	1.33544	1.02459	1.54231	0.523143	1.24109	1.03907	1.09295	1.23963	1.42827	0.974614
TNFRSF14	0.962398	0.372216	0.633521	1.3777	0.712317	0.909988	0.482509	0.75979	0.286247	1.93323	0.404717	0.412531	0.860534	0.611491	0.71411	0.69522	0.464543
TNFRSF17	0.732056	1.18082	0.845747	1.40807	0.807703	0.784229	1.40902	0.708454	1.12074	0.8541	1.77999	1.27664	0.852609	1.0043	0.828013	0.882531	0.719087
TNFRSF18	1.0042	1.22464	1.03366	1.35007	0.714345	0.935582	1.21161	0.858421	0.897609	1.05032	1.6361	1.26377	0.997305	0.857313	0.989379	0.919437	0.882929
TNFRSF1A	0.786285	1.42203	1.00464	1.40702	0.537885	1.0551	1.34276	0.612349	0.768298	1.01126	1.62079	1.23393	0.831855	0.687128	0.81514	0.770941	0.816481
TNFRSF1B	1.38871	1.04128	0.976365	1.45882	0.836716	0.704463	1.13831	1.09106	0.861108	1.49678	1.13077	0.990838	1.26459	1.34658	1.35333	0.997854	1.25857
TNFRSF21	0.407763	1.40709	0.531277	1.57596	0.39171	1.03233	0.860005	0.399309	1.04694	0.404852	1.88617	1.14267	0.792282	0.706707	0.770396	0.407239	0.821402
TNFRSF25	2.67936	1.61367	1.74262	1.8281	0.790809	0.381091	1.74299	1.55197	1.40773	1.36755	1.85566	1.53597	1.8447	2.08872	2.2007	1.70107	1.87998
TNFRSF4	1.32533	1.1203	0.85771	1.31659	0.978863	0.704544	1.22529	0.898188	0.91934	1.08356	1.02106	0.95515	2.10029	1.81711	1.85243	0.891518	1.65788
TNFRSF8	0.476427	1.19829	1.01066	1.37634	1.07644	0.54722	0.962064	0.90115	0.885243	0.701368	1.39531	1.13555	1.22799	0.68887	1.06474	0.444489	0.724723
TNFRSF9	1.74333	1.03775	1.39725	1.38995	1.05989	0.550154	1.3693	1.95235	0.733125	1.03355	0.704788	1.02947	4.46055	3.60995	2.7844	1.79144	2.63255
TNFSF10	1.07766	1.20851	2.56279	1.26414	0.654661	1.0812	1.03169	1.87365	1.15542	1.53861	1.58291	1.32857	0.993314	0.781218	0.744521	1.15148	0.867607
TNFSF11	0.581711	1.11339	1.29546	1.2623	0.231456	1.50624	0.0966375	1.22185	0.475672	0.782128	1.24766	0.958739	0.81575	0.409469	0.525555	0.828934	0.59303
TNFSF12	0.720116	1.19349	0.904327	0.8445	1.3498	0.805696	1.77708	0.870674	0.774733	0.384689	0.546506	1.14681	2.58994	1.66521	1.99076	1.46759	1.59699
TNFSF13B	0.697165	1.24385	0.63056	1.01222	0.795171	1.19261	0.99584	0.651106	0.930029	0.731619	1.35571	1.40632	1.16845	1.01233	0.952945	0.832436	0.997002
TNFSF14	2.60538	2.63979	3.97532	0.474934	1.61297	0.912095	2.67056	2.70076	1.9031	3.35779	1.41056	2.64867	2.34103	1.92421	2.3657	2.66147	2.39873
TNFSF18	0.939486	1.2173	1.87707	1.13637	0.536865	1.32676	0.637647	1.3716	1.02465	1.0864	1.60985	1.76032	0.974536	0.751052	0.681554	1.2376	0.808642
TNFSF4	1.5999	1.39854	1.30778	0.969706	1.07043	0.959863	1.57722	1.63844	1.21298	0.831051	1.01074	1.6393	2.16801	1.52423	1.39184	3.02204	1.40704
TNFSF9	0.835042	1.71446	0.985332	1.50712	0.558024	0.93486	1.08826	0.824171	1.12732	0.904069	1.65336	2.39462	1.72643	1.17929	1.2606	0.780996	1.42142
TNKS2	2.03213	0.348737	3.05252	1.0607	1.2926	0.6467	0.736078	2.02972	0.0993484	2.0437	1.33616	0.513577	1.00756	0.176085	0.273501	2.32228	1.02915
TNNI1	1.24934	1.44556	1.28733	1.33119	1.12226	0.546553	1.2762	1.39046	1.24202	1.00242	1.51958	1.21529	2.22982	1.34363	1.86344	1.03624	2.23063
TNNI2	0.682394	1.29799	0.754042	1.01073	1.17035	0.818916	1.38456	0.578033	1.41406	0.785804	1.60038	1.37063	0.963744	1.00683	0.87263	0.806077	1.12498
TNNI3	0.824611	1.39004	1.00091	1.25615	1.13989	0.603956	1.57124	1.14685	1.62618	1.10477	1.82132	1.37329	1.26641	0.994527	1.26029	0.769757	1.2476
TOP1	1.28711	0.635611	1.33803	1.68731	0.697447	0.615241	0.715536	1.63649	0.683895	3.518	0.630483	0.63019	0.825848	0.868828	1.27832	1.12231	0.851948
TOP2A	1.53415	0.960689	1.15371	1.54685	0.897291	0.555857	0.911856	1.33953	0.984387	1.04972	0.882947	0.960085	1.18623	1.16675	1.41648	0.953511	1.22072
TP53	0.748961	0.896616	1.0807	1.0297	1.39804	0.572253	0.887349	0.737275	1.14918	1.11485	1.27173	1.17031	0.583813	0.782696	0.604431	0.920463	1.02507
TP53AIP1	0.769301	1.14686	0.688734	1.10403	1.28382	0.61215	1.07275	0.732368	0.916982	0.683023	1.07022	1.28761	0.98395	0.969887	1.02661	0.580721	1.361
TP53BP2	3.15331	0.465694	3.12198	1.09231	1.08894	0.818748	0.864592	2.14739	0.185338	3.34806	0.173132	0.184314	0.842681	1.20665	1.12366	1.57636	1.15457
TRADD	1.44838	1.79855	1.3194	1.33448	1.1691	0.496415	1.59696	1.08992	1.89975	1.27523	1.8144	1.93966	1.26779	1.50775	1.33832	1.14539	1.77246
TRAF1	1.88011	1.38473	2.64281	1.42845	1.29958	0.271966	1.37829	2.21531	1.71638	2.19999	1.8737	1.63004	0.715984	1.02626	0.708062	2.06654	1.07819
TRAF2	1.79086	1.29633	1.8194	1.15689	1.32227	0.52084	1.52519	1.38498	1.33334	1.31771	1.43819	1.72758	1.82743	1.5649	2.27105	1.48439	1.79724
TRAF3	1.39339	0.728233	1.61183	1.16119	0.829007	1.00981	1.01574	1.76385	0.708825	1.12871	0.430877	0.652566	0.877594	0.837231	1.01905	1.91469	0.777104
TRAF3IP2	1.30937	1.14887	1.5058	1.02609	1.47497	0.498935	1.49239	1.06608	1.24578	1.37905	1.67179	1.82337	0.963583	0.989768	0.842923	1.24456	1.39427
TRAF5	1.93122	2.04141	2.26836	1.83344	0.981085	0.185477	1.60673	1.56998	1.60716	1.54149	1.89043	1.96007	1.07198	1.06678	1.28678	1.34414	1.1511
TRAF6	0.418231	0.960697	0.531807	0.963161	1.48833	0.548513	1.27846	0.483467	0.666151	0.53613	1.33756	1.58952	0.844548	0.78119	0.771551	0.319384	1.12604
TRAF7	1.09218	1.70618	1.85721	1.1232	0.931254	0.945549	1.94538	1.52254	1.4581	1.30806	0.728361	1.62818	1.35863	1.26857	1.44133	1.54574	1.13179
TSC1	1.12274	1.11731	1.00903	0.944235	1.03003	1.02574	1.1776	1.22409	0.802205	1.09974	0.735974	1.06996	1.02269	0.803762	0.942984	1.47948	0.808355
TSC2	1.47772	1.27106	1.54505	1.32848	0.646265	1.02525	1.73999	1.44431	0.774184	1.81882	0.430546	0.885619	1.85645	1.48928	1.77706	1.53219	1.26012
TUBA3C	0.741544	1.95814	0.943358	0.972644	1.38684	0.640515	2.00138	0.710249	0.68244	0.828441	2.49732	2.45997	0.929866	0.912169	1.07102	0.739595	1.48927
TUBA4A	1.0036	1.6153	1.47248	1.25599	0.258115	1.48589	2.14325	1.16271	0.606839	1.20601	2.69976	2.26406	1.19576	1.2114	1.07302	1.02259	1.46576
TUBA4B	0.851413	2.05916	1.33715	1.20604	0.440086	1.35388	1.52692	0.792934	0.907252	1.12134	2.86421	2.26605	0.943673	1.23706	1.19583	0.818302	1.25964
TUBA8	1.07731	1.90586	1.1555	1.33897	0.12367	1.53736	1.75687	0.842215	0.922985	0.901248	3.14564	2.60374	1.13829	1.45245	1.23566	1.12141	1.6989
TUBB1	0.510243	1.0155	0.770241	1.09872	0.837069	1.06421	1.03882	0.473867	0.40709	0.626355	2.05103	1.75193	0.645238	0.914102	0.593799	0.565463	0.955335
TUBB2A	0.640342	1.36485	0.547305	1.33734	0.75578	0.906882	1.28516	0.630619	0.407092	0.720713	2.08265	2.01064	0.857889	0.94919	0.863787	0.594305	1.11113
TUBB2B	1.85422	0.67221	1.30016	1.59546	0.944593	0.459944	1.06557	1.76538	0.662327	2.22996	1.00539	0.873044	1.82976	1.25086	2.0709	1.29842	1.20965
TUBB4A	1.87534	0.734295	0.982401	1.63806	0.804969	0.55697	1.00045	1.42032	0.494061	1.23541	0.838688	0.878003	1.66803	1.54202	1.7803	1.14317	1.44571
TUBB4B	0.584214	1.00871	0.572851	1.19229	1.03227	0.77544	1.03067	0.588566	0.595014	0.770361	1.27302	1.09867	0.821385	0.782537	0.702344	0.74519	0.647958
TUBB6	1.18285	0.805233	1.15201	1.15675	1.13115	0.712096	0.892086	1.25144	0.460443	0.98871	0.392934	0.666687	1.45512	1.34487	1.3757	1.34299	1.20028
TUBB7P	1.85334	0.491759	1.42408	1.69365	0.628715	0.677639	0.586624	1.18215	0.346672	3.00987	0.617763	0.57305	1.59621	1.56219	1.25888	0.931965	0.718935
TUBD1	0.887469	1.03446	1.02929	1.4494	0.826035	0.724566	1.12399	1.33689	0.585794	0.796386	1.11189	0.987244	1.19883	0.718807	1.278	0.844029	0.611091
TUBE1	0.737434	0.680714	0.40522	1.14157	0.982148	0.87628	0.710843	0.689332	0.471498	0.657468	0.566139	0.566886	0.78118	0.682225	0.591782	1.02422	0.583144
TUBG1	1.39348	0.72644	1.07231	1.20487	0.935877	0.859257	0.917588	1.2571	0.665892	0.90896	0.542318	0.79506	1.17176	1.56909	1.16338	1.75165	1.31419
TUBG2	1.4068	0.709188	0.855859	1.24027	1.17316	0.586562	0.868401	1.11232	0.4575	1.13922	0.531206	0.594905	2.18085	1.44576	1.9769	1.05822	1.43612
TUBGCP2	0.678828	1.78503	0.83257	1.65864	0.857709	0.483651	1.4887	0.541224	1.64365	0.721331	2.24283	1.71929	1.13188	1.13842	1.13385	0.720598	1.11347
TUBGCP3	1.07219	1.59244	1.11147	1.60249	0.378564	1.01894	1.13782	0.882245	1.02346	0.992389	1.91018	1.57265	1.30424	1.07901	1.12874	1.04487	1.08056
TUBGCP5	0.872739	1.07537	0.968687	0.973937	1.12791	0.898158	1.05397	0.802479	0.849103	0.887673	0.998155	0.996631	1.19835	0.897949	0.910875	1.53332	0.797568
TUBGCP6	1.42492	1.53021	2.31344	0.774453	1.37922	0.846326	1.87854	1.71274	1.31584	1.91904	0.66403	1.62955	1.62875	1.46164	1.72856	1.79159	1.46477
TYK2	1.03482	1.17929	0.995099	0.759744	1.15207	1.08818	1.72964	1.17575	0.84939	1.03346	0.731343	1.01464	1.68033	1.67965	0.967551	1.21454	0.947408
TYMP	0.615032	1.73345	0.870232	1.24458	0.771176	0.984247	1.33804	0.579994	1.66398	0.895259	2.09741	2.2859	1.36845	1.28649	1.09472	0.688557	1.35722
TYMS	0.870966	1.83963	1.05123	1.35942	0.789341	0.851238	1.04935	1.07621	1.26783	0.674047	2.13888	2.31365	1.45435	1.14897	1.00938	1.02216	1.01024
TYRO3	0.293829	1.5048	0.507022	1.38521	0.577471	1.03732	1.04803	0.371614	1.34296	0.251357	1.98069	2.39941	1.64105	1.19893	0.892053	0.143221	1.1067
UBA1	0.712321	1.8553	0.950323	1.44654	0.729424	0.824036	1.44993	0.615964	1.61452	0.968282	2.0174	2.50782	2.06027	1.53582	1.58717	0.455146	1.82268
UBA3	1.46319	1.38375	1.46026	1.26036	0.709781	1.02986	0.891599	1.59162	1.24789	1.22869	1.36287	1.58587	1.89201	1.48435	1.63221	1.21273	1.71654
UBA5	1.62319	1.71872	1.89766	1.43416	0.541374	1.02446	1.03818	1.62432	1.57653	1.96028	1.7846	2.02895	1.84209	1.58683	1.51712	1.49715	1.64117
UBB	0.780116	0.615234	0.483153	1.3101	1.32253	0.367372	0.648645	0.77863	0.682204	0.989444	0.791308	0.543146	0.603964	0.467777	0.578418	0.478877	0.605866
UBC	1.66506	1.35559	1.35948	1.36543	0.862557	0.772008	1.55104	1.55328	1.8541	1.74124	1.84294	1.51527	1.69015	1.72878	2.11333	1.31597	1.85907
UBD	2.68982	1.74046	1.5802	1.57035	0.845666	0.583983	1.89663	2.11569	2.08772	1.53635	2.06613	1.90658	2.14216	2.32332	2.26372	1.81531	2.44011
UBE2A	1.09771	1.28648	1.24849	1.55233	0.857888	0.58978	1.03187	1.15155	0.982635	1.33102	1.34925	1.22341	0.900843	0.89706	1.04028	1.09455	1.2415
UBE2B	0.556428	0.92111	0.835099	2.05096	0.502386	0.446658	0.863357	0.631068	0.596616	0.739088	0.677568	0.835729	1.03636	0.695149	0.93479	0.64288	0.963371
UBE2C	0.473494	1.4635	0.737234	1.29581	0.876656	0.827533	1.40939	0.79936	1.37951	0.214254	0.548489	1.18143	1.38534	1.2206	1.21644	1.10638	1.52555
UBE2D1	0.919618	1.57193	1.19514	1.64521	0.716131	0.63866	1.03116	0.926483	0.871437	1.11625	1.261	1.29415	0.591381	0.715142	0.837086	1.03688	1.12153
UBE2D2	1.73271	1.07341	1.20328	1.05789	1.03126	0.910848	1.16996	1.55566	0.760494	1.46415	0.415928	0.765334	1.18635	1.204	1.58191	1.73077	1.10538
UBE2D3	0.935469	1.00689	0.555008	1.1427	1.07673	0.780572	1.02009	1.06502	0.82741	1.06911	0.806753	0.894689	0.89411	0.851154	0.866341	1.0319	0.860314
UBE2D4	0.432729	1.00247	0.551949	1.29372	1.19822	0.508056	0.900686	0.474826	0.464541	0.598531	0.910908	0.933399	0.521876	0.522128	0.512157	0.352776	0.658969
UBE2E1	1.2355	1.6156	1.35571	1.25204	0.986282	0.761678	1.68214	1.37276	1.02145	1.368	0.549218	1.01125	1.32799	1.21432	1.12958	1.49507	0.884049
UBE2E2	0.685849	0.94982	0.936593	0.920109	1.6525	0.427386	1.01737	0.80851	0.795397	0.783718	1.38957	1.40114	0.566797	0.743562	0.613181	0.666403	1.07638
UBE2E3	1.07158	1.07973	0.914843	1.21252	1.09923	0.68825	1.2216	1.08732	0.880903	0.972045	1.10061	1.23137	1.073	0.952381	1.11298	0.856817	1.19941
UBE2F	1.27887	1.11191	1.0685	1.07335	1.36477	0.561888	1.21879	1.13329	1.07868	0.787246	1.39974	1.47869	1.77899	1.26748	1.89513	0.957447	1.46562
UBE2G1	2.05472	0.894995	1.27322	1.38809	0.756071	0.85584	1.04536	1.76716	0.735996	1.4096	0.517248	0.921211	2.14356	1.48001	2.03335	1.89282	1.31377
UBE2H	1.92476	1.393	2.22867	0.850085	1.43628	0.713637	1.46264	1.88708	0.773899	0.909421	1.62493	1.95944	0.945358	0.800832	0.943249	4.56429	1.28067
UBE2I	1.63238	1.62109	1.25586	1.10226	1.37902	0.518717	1.93432	1.03762	1.57591	1.33898	2.21741	2.06242	1.17473	1.30943	1.14909	1.4492	1.33824
UBE2J1	1.02056	1.04369	1.36575	1.06932	1.36757	0.563109	1.10928	1.1566	0.80604	0.911156	1.36487	1.55869	0.991579	0.731027	1.07572	0.845432	1.06393
UBE2J2	1.82956	1.34011	1.26688	1.12806	1.36323	0.508711	1.54691	1.09552	1.10183	0.990755	1.77853	1.91561	1.50449	1.51614	1.70039	1.41649	1.6138
UBE2L3	0.732226	1.26102	0.61036	0.960041	1.41385	0.626114	1.2884	0.774003	0.665962	0.564512	1.38213	1.73027	1.68173	1.22264	1.79729	0.47811	1.41856
UBE2L6	1.80351	1.65227	1.0902	1.27034	0.851184	0.878471	1.64579	1.28929	1.3606	1.34124	1.86211	1.67575	1.6857	1.74059	1.47542	1.22581	1.62463
UBE2M	0.73031	1.86111	0.974104	0.940305	1.41004	0.649659	1.75616	0.754169	1.10214	0.842784	2.29924	2.12082	1.06498	1.07681	1.17707	0.71699	1.25474
UBE2Q1	0.512389	1.5156	0.747336	1.00389	1.24074	0.755371	1.36364	0.61609	1.01563	0.56856	2.06076	1.8556	1.06478	1.1205	1.09565	0.429001	1.32113
UBE2R2	0.520995	1.42154	0.798734	0.870615	1.29648	0.832909	1.1578	0.548225	0.663061	0.692857	1.97513	1.87717	0.681596	0.736799	0.82273	0.34697	1.10224
UBE2T	0.755674	1.44398	0.799502	1.21536	1.00949	0.775147	1.39472	0.97211	0.974495	0.957699	1.87121	1.87719	1.4051	1.02669	1.17783	0.700573	1.3404
UBE2V1	1.36375	0.93781	1.45768	1.65979	0.741052	0.599155	1.20513	1.65708	0.600854	0.956548	1.41527	1.40332	2.27231	1.54979	1.84609	1.08973	1.39408
UBE2V2	1.48853	1.13029	1.22987	1.55685	0.665717	0.777429	1.31946	1.64927	1.09846	1.42734	1.54565	1.46715	1.5891	1.37091	1.84941	1.30899	1.35874
UBE3A	1.05768	1.87176	1.16819	1.07491	0.354702	1.57038	1.27783	0.859909	0.0234429	1.08135	2.04301	1.73256	0.692334	0.570155	1.16206	0.644887	0.687546
UBE3B	0.576432	1.15592	0.951464	1.00199	0.634867	1.36314	1.12193	0.663299	0.178494	1.03988	2.09427	1.77609	0.541235	0.460189	0.534059	0.435129	0.863208
UBE3C	2.16002	1.0492	4.31791	1.09767	0.614391	1.28794	1.15937	2.67976	0.0393106	3.19293	2.08524	1.43188	0.537077	0.482734	0.551224	1.9943	0.537089
UBR1	1.92731	1.50176	1.87878	1.44946	0.642689	0.907852	1.63199	1.85717	0.942021	1.6144	1.88874	1.79341	2.46345	1.60268	2.31536	1.5437	1.8194
UBR2	0.371778	1.0633	0.800719	0.971793	1.04311	0.985093	1.19333	0.547234	0.665471	0.587524	1.7149	1.24234	1.27006	0.650349	0.544002	0.327414	0.588893
UBR5	0.468307	1.09288	0.57908	0.998837	1.21461	0.786557	1.19789	0.460314	0.768506	0.491112	1.55932	1.17024	0.775519	0.879751	0.700209	0.955041	0.682888
UBTF	1.04408	1.51009	1.08357	1.48054	0.860469	0.658987	1.65437	1.22644	1.11721	0.858638	1.97985	1.86513	2.0976	1.78143	2.0289	0.832227	1.7479
UCN	1.07055	1.66977	1.14377	1.66478	0.803652	0.531572	1.976	1.04292	1.30891	0.893275	2.51024	2.19896	1.52126	1.39559	1.38776	0.922017	1.34933
USP1	0.362724	1.04043	1.23092	1.18037	0.676719	1.14291	0.721802	0.639387	0.554622	0.377119	1.69	0.915333	0.431994	0.378174	0.475064	0.357198	0.21393
USP10	0.598801	1.53715	0.880775	1.43973	0.789525	0.770749	1.16833	0.545143	1.30086	0.686228	2.1415	1.38295	0.832435	0.821449	0.82317	0.697285	0.660465
USP11	1.32055	1.25929	0.920536	1.19047	0.973726	0.835802	1.12185	1.04548	0.817786	0.772546	1.40782	1.17168	1.6642	1.41539	1.40606	0.888831	0.991882
USP12	0.581835	1.44074	0.747407	1.08975	0.933281	0.976974	0.763338	0.497624	0.671182	0.474979	1.72912	1.09575	0.721555	0.66463	0.942719	0.534085	0.272954
USP13	0.789525	1.92956	0.918227	1.60928	0.921839	0.468885	1.65819	0.65585	1.46648	1.05177	2.38966	1.79942	1.16368	1.14639	1.14133	0.751996	1.00766
USP14	0.523476	0.936054	0.492673	0.884594	1.33752	0.777886	0.894686	0.636025	0.635724	0.463863	0.946986	0.783951	0.943204	0.983365	0.714771	0.904073	0.683561
USP15	0.414543	1.24966	0.5046	1.18757	0.743873	1.06855	0.702751	0.349429	0.801902	0.41409	1.4412	1.03795	0.843184	0.631317	0.739108	0.82393	0.556051
USP16	0.666741	0.534263	0.459213	0.934193	1.02582	1.03998	0.617961	0.655048	0.390444	0.634827	0.390471	0.521263	1.38747	1.11417	1.16024	0.60987	1.10088
USP18	0.430874	1.12647	0.46271	0.844352	1.05971	1.09593	0.795646	0.392108	0.799865	0.426901	1.17664	1.18708	1.04188	0.81832	0.707757	0.777369	0.738904
USP19	0.299724	0.65975	0.374727	0.579529	1.95736	0.463108	0.319154	0.298713	0.446441	0.28896	0.744434	0.819636	0.751772	0.566344	0.560211	0.194308	0.555559
USP20	1.11975	1.77065	1.03983	1.43932	0.860802	0.699879	1.36581	1.06994	1.57825	1.17245	1.79113	1.90174	2.24996	1.49118	1.76485	0.819151	1.6959
USP21	2.24816	2.27857	2.40938	1.82006	0.685314	0.494631	1.90977	1.78709	2.15973	2.10383	2.72133	3.08643	2.78083	2.23826	2.19997	1.96477	2.33544
USP25	0.495979	2.31535	0.796414	1.52072	0.545764	0.93352	1.30653	0.446756	1.0725	0.281086	2.20188	2.9033	2.25345	1.33622	1.25976	0.44095	1.45252
USP26	0.353187	1.70557	0.643601	1.26464	0.805104	0.930255	1.19906	0.411947	1.61829	0.534675	2.03796	2.14423	1.56076	1.37565	1.20216	0.396051	1.36962
USP28	3.27283	0.60036	3.19405	0.620035	1.12732	1.25264	0.514479	2.44076	0.398813	2.44523	0.414946	0.541553	1.97346	2.55108	2.1804	1.78663	3.09639
USP29	2.23703	1.37755	1.79437	1.16674	0.904237	0.929025	1.03273	2.02463	1.0884	2.47822	1.14706	1.47442	1.82158	1.77917	1.77588	1.65063	1.67165
USP3	1.53332	0.918723	2.01948	0.777977	1.40643	0.815597	1.065	1.46125	0.915843	2.20377	1.3775	0.832536	0.935516	0.722071	0.595414	1.65525	0.687224
USP30	1.72564	1.69361	2.19167	0.778881	1.21678	1.00434	1.58095	1.73846	0.977336	2.74924	0.6855	1.05383	0.624038	0.667632	1.07327	1.79409	1.13116
USP31	1.72488	1.0658	1.11998	0.978476	0.986378	1.03515	1.21284	1.30548	0.891952	2.14932	0.822032	0.798104	1.33584	1.00628	1.23636	1.32923	1.36014
USP32	1.8573	1.76101	3.78865	1.13055	1.20286	0.666591	1.55557	2.26303	1.80718	2.34709	2.52875	1.85096	1.04154	1.13077	0.946154	1.74272	1.42512
USP33	0.656796	1.79839	1.05417	1.21389	1.08275	0.703351	1.45336	0.79144	1.60485	0.710616	2.08544	1.72737	1.74112	1.10529	1.04315	0.602963	1.27909
USP34	1.11736	1.79039	1.01743	1.67288	0.532434	0.794684	1.47574	0.967086	1.78701	0.989908	2.22656	2.06794	1.28311	1.70565	1.37758	0.879675	1.94645
USP35	2.35216	0.910846	1.48304	1.21411	0.945563	0.840323	1.03474	1.81385	0.858072	2.7732	0.755371	0.812574	1.25755	1.25926	1.75381	1.60936	1.12188
USP36	2.14788	1.10872	1.80764	1.7587	0.73796	0.503344	0.962634	2.99059	0.847901	2.03415	0.917031	1.07424	1.60696	1.20258	1.6681	1.4694	1.43157
USP37	0.534485	1.21469	0.882514	1.64171	0.767719	0.590567	0.987274	0.585818	0.755578	0.544804	1.36641	1.44603	0.609508	0.814712	0.753266	0.575055	1.12743
USP38	0.399669	1.4426	1.16524	1.56332	0.936871	0.499808	0.900129	0.660347	0.812817	0.546822	1.79951	1.3508	0.375019	0.610464	0.491004	0.409172	0.908233
USP39	1.93645	1.14578	1.78517	1.30649	0.890268	0.803239	1.13439	1.91474	1.13984	1.26484	1.21993	1.24119	1.41922	1.45055	1.51071	1.32593	1.45681
USP4	1.40258	1.1839	1.09877	1.26331	1.11717	0.619515	1.13044	1.05982	0.819337	0.865832	0.989341	1.09667	1.22785	1.13898	1.1532	0.950022	1.19413
USP40	0.957796	1.55381	1.1376	1.28145	1.08817	0.630373	1.44079	1.08554	1.70342	1.32026	2.06885	1.66806	0.966915	1.20965	0.992605	1.01466	1.0778
USP42	1.25352	1.83033	1.97297	1.2622	0.939065	0.798738	1.87632	1.55277	1.03369	1.39663	2.09618	1.82058	1.0282	1.07416	1.03669	1.69947	1.05245
USP43	0.832247	0.598346	0.868832	1.38221	0.757242	0.860549	0.626799	0.767544	0.540377	1.79139	0.595478	0.608972	0.903036	0.607763	0.985512	0.697141	0.658966
USP44	0.621105	1.66589	1.30539	0.971099	0.85004	1.17886	1.22526	1.32578	1.40226	0.8048	1.85105	1.54963	0.672767	0.925271	0.787929	0.807134	0.922866
USP45	1.27374	0.853354	1.01318	1.31352	1.29393	0.39255	1.01774	0.935748	0.748257	0.962	1.14873	1.04403	1.18096	0.759439	1.24604	0.721124	0.873691
USP46	0.595706	1.80225	0.890203	1.2999	1.13419	0.56591	1.77154	0.731124	1.44778	0.926073	2.40929	2.05328	1.36967	1.35581	1.42112	0.525553	1.36049
USP47	1.17822	0.483147	0.932754	1.31011	0.797446	0.892445	0.54438	0.97611	0.420062	2.78386	0.510207	0.498332	1.09891	0.698682	1.28723	0.728111	0.746984
USP48	0.840903	1.04764	1.13542	0.856695	1.49799	0.64532	1.2511	1.0763	0.404908	1.17199	1.77121	1.31792	0.761135	0.675868	0.785315	0.909217	0.597571
USP49	1.78725	0.332666	1.94358	1.78923	0.670451	0.540322	0.376056	1.38024	0.266928	2.02118	0.311914	0.303523	2.21524	0.750144	2.00617	0.94865	0.823154
USP5	2.50082	1.13224	1.58636	1.04664	1.45325	0.500115	1.40897	1.7603	0.751119	1.54017	1.49425	1.5925	1.72355	1.39035	1.71117	1.41053	1.34473
USP50	0.699431	1.1821	0.918169	0.848447	1.52069	0.630867	1.25581	0.744693	0.852013	0.98444	2.12223	1.5141	0.759916	0.81381	0.750052	0.754911	0.627833
USP51	0.878214	0.523136	0.760153	1.38861	0.477674	1.13371	0.61444	1.01166	0.368085	1.43448	0.363316	0.395788	1.40864	0.504017	1.01084	0.847328	0.523262
USP53	2.48046	1.23745	3.79072	1.60481	0.410621	0.98457	1.21991	2.90644	0.908098	3.84021	0.630834	0.97845	2.18401	0.971661	2.19216	3.07919	0.879481
USP54	2.34144	1.06598	2.41249	1.64736	0.685488	0.667148	1.20665	2.06693	0.926172	3.86357	1.23488	1.26894	1.30829	1.32586	2.16902	1.82806	1.35307
USP6	0.633509	0.998995	0.690189	1.20597	1.08537	0.708661	1.03796	0.489593	0.370342	0.598701	1.50933	1.35204	0.778553	0.848702	0.759596	0.62541	0.768025
USP6NL	1.06959	1.44262	0.994335	1.31297	0.86506	0.821968	1.59049	1.13171	0.876593	1.10064	1.97885	1.64376	1.1757	1.16729	1.17508	0.906386	1.07221
USP7	0.498936	1.56403	0.790702	1.31127	0.715324	0.973407	1.58081	0.567506	1.32131	0.489694	2.68291	1.98938	0.941187	1.21725	0.847297	0.527079	0.963271
USP8	0.797461	0.556526	0.708195	2.0133	0.502617	0.484081	0.677523	0.99294	0.415143	1.00026	0.724519	0.504164	1.16693	0.709394	1.26787	0.638677	0.50106
USP9X	0.851898	1.2866	1.10418	1.24528	0.600196	1.15452	1.38497	0.955384	1.15999	1.17727	2.13679	1.3217	0.977473	1.08745	0.847638	0.933456	0.780248
USP9Y	1.5096	1.1125	1.79108	1.08599	0.825641	1.08837	1.31064	1.42124	0.767964	1.8618	1.67617	1.25906	0.889425	0.892553	0.851408	1.38301	0.724291
UTS2	1.52554	1.31571	2.11955	0.917896	1.10427	0.977831	1.51125	1.52574	1.01716	2.05108	0.593268	0.865655	1.21853	0.911738	1.271	1.67917	0.924053
VAV1	0.599996	1.06684	0.974441	1.07255	0.995842	0.93161	1.20257	1.00266	1.03536	0.654849	1.63011	1.14567	0.845769	0.936874	0.765782	0.722121	0.620997
VAV2	1.62122	1.59454	1.47784	1.72099	0.77059	0.508418	1.77423	1.72247	1.45109	1.6717	2.14006	1.51436	1.45394	1.29616	1.28709	1.23065	0.700355
VAV3	0.907193	1.1116	0.932285	1.19899	1.31579	0.485222	1.18837	1.23922	0.790051	0.781052	0.660435	0.844651	1.56429	1.37704	1.2902	1.40332	1.07681
VCAN	0.461561	1.07951	0.71768	1.17806	0.706699	1.11524	1.12285	0.438532	0.543137	0.434482	1.63246	1.27984	0.821509	0.820256	0.879682	0.444355	0.652917
VDAC1	0.444916	1.07136	0.741969	1.11114	0.588444	1.30041	0.975526	0.517818	0.652783	0.915319	1.81075	1.22741	0.549241	0.522118	0.660309	0.360583	0.393043
VDAC2	0.498373	0.725673	0.821405	1.29392	0.902473	0.803603	0.894477	0.622941	0.512442	0.440736	1.21278	0.668793	1.28666	1.18932	1.58948	0.389406	0.43274
VDAC3	1.11915	1.24514	0.598769	1.01481	1.04327	0.941919	1.09567	0.959885	0.933153	2.18894	1.6394	1.2473	0.786798	0.698421	0.813126	0.563777	0.669965
VEGFA	1.1744	1.31258	1.89878	1.28159	1.26048	0.457928	1.3729	1.53029	1.33805	1.45433	0.546381	1.39817	1.88354	1.99529	1.86685	1.56238	1.5665
VEGFB	1.205	0.484733	0.902529	0.976641	1.00191	1.02145	0.551556	1.06413	0.389286	1.56864	0.350668	0.423804	0.8167	1.05473	0.86017	1.05386	0.883307
VEGFC	0.778871	1.67422	0.786137	1.20783	1.06104	0.731129	1.41701	0.637389	1.48521	1.11018	2.06824	1.58811	1.00643	1.16357	1.08956	0.766356	0.973892
WAS	1.16886	0.989975	1.4661	0.771137	1.24377	0.985089	1.58527	1.40475	0.832225	1.65601	0.60797	1.22266	1.73613	1.38212	1.53454	1.24528	1.28715
WIF1	2.57443	1.22289	2.45632	1.16491	1.1157	0.719385	1.35914	2.74602	1.01761	3.03772	1.19522	1.1569	2.6912	1.4199	1.94071	2.05859	1.25909
WNK1	1.10401	1.62303	0.88726	1.15551	0.793238	1.05126	1.31158	0.915373	1.14288	0.944748	1.58922	1.50656	1.96214	1.64746	1.61208	0.937842	1.32001
WNT1	0.831486	1.40732	0.865311	1.07027	0.904468	1.02527	1.03916	0.776519	1.07263	0.968029	1.49587	1.31811	1.19785	1.00039	1.02075	0.914728	0.883188
WNT10A	1.36947	0.676015	1.09875	0.685584	1.48076	0.833652	0.832943	1.32009	0.463276	1.51188	0.437543	0.615561	1.8602	1.13695	1.48793	1.75057	1.45045
WNT10B	1.15284	1.87587	1.25568	1.50059	0.558638	0.940771	0.991076	0.910535	1.74945	1.3184	2.20302	2.17211	1.6217	1.34021	1.2838	1.28237	1.27109
WNT11	0.697582	1.08934	0.695611	1.09777	1.11356	0.788674	0.985639	0.798045	0.9462	0.725213	1.13702	1.06343	1.76081	1.53302	1.39191	0.564572	1.57319
WNT16	1.11775	1.69905	1.0062	1.40749	0.956161	0.636344	1.39907	1.04016	1.31249	0.901041	1.65772	1.99191	2.52985	2.14785	2.68246	0.984539	2.04985
WNT2	0.585622	2.32925	0.962797	1.99352	0.424715	0.581766	1.43969	0.788596	2.69111	0.333367	3.14207	3.04654	2.35925	1.937	1.56948	0.521004	1.66803
WNT2B	0.755611	1.60829	0.732447	1.28667	0.820724	0.892606	0.838799	0.938788	0.853479	0.542004	1.2416	1.79708	2.07242	1.84096	1.80762	0.783718	1.66003
WNT3	1.20794	1.46029	2.12809	0.581544	1.07936	1.3391	2.67481	2.29126	1.11073	1.16052	0.893626	1.82533	1.34942	2.31681	2.06945	2.05019	3.49464
WNT3A	1.39609	0.771575	1.60875	0.564104	0.734348	1.70155	0.939658	1.70662	0.615923	1.69562	0.553688	0.656926	0.755496	1.25241	0.917102	1.87294	1.24367
WNT4	1.45501	1.73334	1.32204	1.11422	1.04635	0.839427	1.67403	1.01689	1.98885	1.69523	2.24709	1.55517	1.25314	1.83018	1.25527	1.58153	1.33623
WNT5A	1.15454	0.95595	1.01044	1.08091	1.2714	0.647691	0.945959	1.25867	0.660364	1.30131	0.489767	0.54157	0.56381	0.606967	0.655782	1.4603	0.572352
WNT5B	1.54799	1.40017	2.86609	1.11031	1.08352	0.806168	1.44157	1.53898	1.59657	1.90134	2.03711	1.17436	1.29673	1.44234	0.913672	1.59934	0.993245
WNT6	1.11085	1.25844	1.49638	1.03257	1.33958	0.627852	1.49378	1.55413	1.62877	1.27103	1.82294	1.26189	1.10856	1.21147	1.11727	1.19359	1.11017
WNT7A	0.821	1.93747	1.39831	1.17074	1.34144	0.487816	1.85823	1.53972	2.18777	0.859604	1.21167	1.57758	1.21187	1.01938	0.996066	1.65326	0.875906
WNT7B	1.50394	1.69553	1.51912	1.26343	1.0532	0.683378	1.74747	1.3591	2.06842	1.50301	2.45468	1.84422	1.26679	2.0376	1.23373	1.5402	1.58016
WNT8A	1.8523	0.947004	1.38984	1.76916	0.779621	0.451221	1.07624	1.7146	0.970231	3.43106	1.01068	0.811783	1.01855	1.17907	1.02937	1.34964	0.891771
WNT8B	0.704685	1.84463	0.768189	1.0847	0.983212	0.932092	1.74128	0.497	1.74394	0.731659	2.21383	1.78865	1.01097	1.68534	1.09899	1.36437	1.34417
WNT9A	0.801058	1.82891	1.30017	1.38657	0.636337	0.977096	1.66654	0.804955	2.28767	1.15446	2.88527	2.05461	1.16966	1.91449	1.14035	0.866726	1.53795
[truncated: 17 more rows]

## Sheet: pas. pediatric Leukemia
Pathway name	AML-1	ALL-1	AML-3	Norm-1	Norm-2	Norm-3	ALL-3	AML-5	AML-6	AML-2	ALL-7	ALL-5	ALL-6	ALL-2	ALL-4	AML-4	AML-7
AHR_Pathway	0.108243	0.0208249	0.190164	-0.132521	0.0751438	0.0573773	0.0106082	0.0821016	0.0656159	0.193863	0.031624	-0.0651217	0.152996	0.0488607	0.0893483	0.0296562	-0.0247593
AHR_Pathway_C-myc_expression_via_RELA	0.0867447	-0.0757488	0.139009	0.0277504	-0.0457352	0.0179849	-0.0606172	0.0875856	-0.0193632	0.135362	-0.150261	-0.247783	0.1579	0.0802224	0.109445	0.0495896	-0.0676103
AHR_Pathway_Cath_D_expression_via_SP1	0.0839693	-0.108471	0.192257	-0.00315073	-0.00708756	0.0102383	-0.110205	0.0993791	-0.0430954	0.187029	-0.163126	-0.268899	0.128562	0.0203938	0.0915174	0.000776438	-0.0905597
AHR_Pathway_CYP1A1_CYP1B1_CYP1A2_AHRR_gene_expression_via_POLR2B	-0.204984	0.134964	-0.185141	-0.0416085	0.195606	-0.153997	0.0675099	-0.34149	0.148081	-0.0644005	0.504724	0.0443848	-0.0681902	-0.175723	-0.0814065	-0.296587	-0.025396
AHR_Pathway_PS2_Gene_expression_via_ESR1	0.0933186	-0.0694913	0.174817	0.00926038	-0.0372151	0.0279547	-0.0690028	0.0909403	-0.00964884	0.158809	-0.122585	-0.234171	0.156448	0.0573322	0.107631	0.0358323	-0.0757995
Akt_Signaling_Pathway	-0.00724456	-0.0486972	0.0479322	-0.0334346	-0.00591176	0.0393464	-0.0488962	-0.00780264	-0.0572526	0.0274604	-0.0870722	-0.0206108	-0.040796	-0.0299464	-0.0390533	-0.00455184	-0.0543299
Akt_Signaling_Pathway_Acetylation_of_proteins	0.235855	-0.175391	0.190306	-0.0179333	0.0128806	0.00505267	-0.0450452	0.190477	-0.117264	0.292243	-0.124474	-0.0317751	0.137502	0.09202	0.0970604	0.123658	0.0369643
Akt_Signaling_Pathway_Aggregation_and_Neurodegeneration	0.106152	-0.209924	0.123136	-0.0402823	0.183254	-0.142971	-0.178707	0.127429	-0.23102	0.133601	-0.125359	-0.174993	0.0325123	-0.053412	-0.0100954	0.0808645	-0.0849587
Akt_Signaling_Pathway_Apoptosis	0.19487	-0.14947	0.177065	-0.0241911	0.0456291	-0.021438	-0.0360778	0.17029	-0.123495	0.225207	-0.101041	-0.0648456	0.154982	0.0837771	0.0890323	0.10721	0.0255211
Akt_Signaling_Pathway_AR_mediated_apoptosis	0.197957	-0.190927	0.169395	-0.0117247	0.0346119	-0.0228871	-0.0776064	0.175509	-0.144922	0.266661	-0.151515	-0.0830975	0.120638	0.0495963	0.0726989	0.104023	0.00143112
Akt_Signaling_Pathway_Blocks_Apoptosis	0.211143	-0.129365	0.185375	0.00709703	0.0160392	-0.0231362	-0.0120637	0.199802	-0.0807532	0.277186	-0.0944083	-0.00824105	0.156508	0.111105	0.112066	0.111154	0.0271273
Akt_Signaling_Pathway_Blood_cell_differentiation	0.244887	-0.194071	0.191934	-0.00062947	0.0131876	-0.0125581	-0.0652509	0.212818	-0.144928	0.288752	-0.171456	-0.079008	0.195645	0.128068	0.14127	0.135387	0.0466389
Akt_Signaling_Pathway_Cell_Cycle	0.126848	0.349457	0.166318	-0.207563	-0.151562	0.359125	0.309004	-0.00626744	0.481428	0.219863	0.482207	0.664076	0.261352	0.0202153	0.156281	0.0662743	0.3548
Akt_Signaling_Pathway_Cell_Cycle_Progression	0.140241	-0.161555	0.136636	-0.0313408	0.0671883	-0.0358475	-0.0576891	0.132875	-0.142652	0.225961	-0.108811	-0.0996617	0.0809309	0.0423586	0.0276531	0.0673521	-0.0193584
Akt_Signaling_Pathway_Cell_Survival	0.129901	-0.0202713	0.114715	0.0897849	0.0333224	-0.123107	0.0254974	0.173747	-0.07763	0.243166	0.0676029	0.111789	0.144242	0.086717	0.102475	-0.0024648	0.0060007
Akt_Signaling_Pathway_Elevation_of_Glucose_Import	0.221907	-0.139258	0.200593	0.0151037	0.000299816	-0.0154035	-0.00975817	0.20414	-0.0875495	0.29203	-0.102386	-0.0413591	0.156892	0.0995401	0.109031	0.121621	0.0227167
Akt_Signaling_Pathway_Enhancement_of_Breast_Epithelial	0.210069	-0.176558	0.155517	0.000899871	0.0292543	-0.0301541	-0.0544712	0.184293	-0.124203	0.26613	-0.139632	-0.0773922	0.14101	0.100295	0.118565	0.122608	0.00827583
Akt_Signaling_Pathway_ERK_mediated_apoptosis	0.255453	-0.192858	0.186016	0.0145411	0.0129532	-0.0274944	-0.0549076	0.226201	-0.150862	0.297327	-0.15036	-0.0952511	0.179713	0.134748	0.134198	0.161594	0.0161086
Akt_Signaling_Pathway_Genetic_Stability	0.253389	-0.215126	0.163961	-0.00799888	0.0471457	-0.0391468	-0.0740225	0.196003	-0.139806	0.287654	-0.155567	-0.0977073	0.153009	0.0912264	0.110567	0.136771	0.0222622
Akt_Signaling_Pathway_Glucose_Uptake	-0.423418	-0.052095	-0.330739	-0.0193507	-0.123224	0.142575	0.0861936	-0.442136	0.193322	-0.390578	0.0569657	0.309562	0.153586	0.0238346	0.110074	-0.62242	0.00935291
Akt_Signaling_Pathway_Glycogen_Synthesis_and_Apoptosis	0.233373	-0.152467	0.174679	-0.0461881	-0.0101125	0.0563006	-0.0311525	0.164347	-0.097825	0.295251	-0.0558986	0.0167157	0.1895	0.105645	0.119787	0.110685	0.0531737
Akt_Signaling_Pathway_Increased_GLUT4_translocation	0.241071	-0.166307	0.18807	-0.0121751	0.0145092	-0.00233406	-0.0392815	0.206321	-0.120478	0.295911	-0.146528	-0.0528294	0.162017	0.0968775	0.11556	0.130511	0.0336895
Akt_Signaling_Pathway_JNK_mediated_apoptosis	0.219784	-0.134682	0.196741	0.0026465	0.00596825	-0.00861476	-0.0272794	0.20144	-0.0717664	0.255065	-0.0708156	-0.0371849	0.156729	0.0988053	0.108844	0.120918	0.0192935
Akt_Signaling_Pathway_Neuroprotection	0.301933	-0.131261	0.237829	0.0427757	-0.00180693	-0.0409687	-0.00666479	0.268986	-0.102229	0.321474	-0.151763	-0.0180432	0.228282	0.110011	0.15028	0.210821	0.0648111
Akt_Signaling_Pathway_NF-kB_dependent_transciption	0.264918	-0.212852	0.215518	-0.00894837	0.00390096	0.00504741	-0.0789557	0.227587	-0.145182	0.32197	-0.149171	-0.0651168	0.136901	0.0936271	0.0911018	0.1541	0.010707
Akt_Signaling_Pathway_NF-kB_pathway	0.18116	-0.250288	0.148826	-0.00434071	0.00183199	0.00250872	-0.146943	0.150939	-0.173646	0.226751	-0.1489	-0.185544	0.00799088	-0.0263647	-0.0119269	0.0807087	-0.0776997
Akt_Signaling_Pathway_NFAT_degradation	0.0541206	-0.0912611	0.0468954	-0.0328027	0.10658	-0.0737775	-0.0607152	0.00777122	-0.0192436	0.0359245	-0.0513637	-0.120359	0.00609851	0.000793956	0.0300249	-0.0133253	-0.0607692
Akt_Signaling_Pathway_NO_production	0.204001	-0.179465	0.126524	-0.0166523	0.0179052	-0.00125296	-0.0585116	0.141049	-0.121021	0.226843	-0.130034	-0.0716589	0.154921	0.0824313	0.109017	0.0852958	0.0317427
Akt_Signaling_Pathway_p73_mediated_apoptosis	0.22006	-0.196749	0.1556	-0.0399779	0.0171796	0.0227982	-0.0405278	0.191448	-0.142852	0.276476	-0.210285	-0.0868421	0.189218	0.0797507	0.12182	0.106128	0.0629246
Akt_Signaling_Pathway_Protein_Synthesis	0.0941562	-0.197018	0.0751283	-0.0236465	0.0495847	-0.0259382	-0.122116	0.0267924	-0.117019	0.113517	-0.0778394	-0.109944	0.0581526	0.0412769	0.013702	-0.010185	0.00391473
Akt_Signaling_Pathway_Proto-Oncogenic_and_RTK-signaling	0.265479	-0.164364	0.186801	-0.0101659	-0.000653519	0.0108194	-0.050399	0.198263	-0.136611	0.295885	-0.158949	-0.0415212	0.200506	0.111667	0.133284	0.150785	0.0539612
Akt_Signaling_Pathway_Regulation_of_Cyclic_Nucleotide	0.259966	-0.178098	0.230389	-0.0263459	0.0282538	-0.00190784	-0.0800818	0.225767	-0.114113	0.332376	-0.102761	-0.0579233	0.105059	0.0380995	0.0655629	0.15144	-0.0252031
Akt_Signaling_Pathway_Regulation_of_Na+_Transport	0.276388	0.587331	0.20328	0.137527	-0.460551	0.323024	0.546928	0.110443	0.565828	0.283875	0.543018	0.61784	0.421537	0.166015	0.408247	-0.00388002	0.38707
Akt_Signaling_Pathway_Splicing_Regulation	0.39341	0.318694	0.37124	-0.0597618	-0.201998	0.26176	0.355308	0.353701	0.428388	0.464223	0.0251881	0.282585	0.172051	0.0553063	0.289951	0.297871	0.128376
Akt_Signaling_Pathway_Survival_Genes	0.283713	-0.176772	0.241672	-0.0354599	0.010924	0.0245358	-0.0737989	0.236109	-0.149737	0.31271	-0.220021	-0.0692328	0.140675	0.0536781	0.10991	0.14824	0.0809726
Akt_Signaling_Pathway_Synaptic_Transmission	0.122514	-0.188764	0.10183	-0.0431734	0.0309193	0.0122541	-0.0928307	0.0456451	-0.111801	0.15484	-0.196403	-0.182487	-0.0815791	-0.00704791	-0.0474517	0.0758694	-0.0623388
Akt_Signaling_Pathway_Translation	-0.400563	0.135804	-0.294924	-0.100874	-0.00641632	0.107291	0.189781	-0.485265	0.41628	-0.351732	0.540099	0.303624	-0.117159	-0.168379	-0.249492	-0.49155	-0.116304
Akt_Signaling_Pathway_Tumor_Supression	0.257213	-0.175856	0.157847	0.0548496	-0.045582	-0.00926756	-0.0380373	0.191319	-0.131092	0.299205	-0.124685	-0.0822681	0.212359	0.209545	0.169564	0.127242	0.0322993
ATM_Pathway	0.15428	-0.0321223	0.174405	-0.0155949	0.017548	-0.00195313	-0.0280299	0.147024	-0.0885213	0.13503	-0.188866	-0.0739846	0.0470728	0.00575956	0.0647692	0.109461	0.0564309
ATM_Pathway_Apoptosis	0.532414	0.241226	0.403789	0.0921056	-0.351257	0.259152	0.410027	0.481244	0.286908	0.35809	-0.304565	0.408091	0.403466	0.102366	0.501354	0.443123	0.368267
ATM_Pathway_Apoptosis_and_Senescence	0.161731	0.0199249	0.14257	0.0583311	-0.0825226	0.0241915	0.075568	0.139259	0.0460522	0.193353	-0.215849	0.145794	0.095998	0.0280193	0.125029	0.155111	0.12747
ATM_Pathway_Cell_Cycle_Checkpoint_Control	0.435465	0.267583	0.321892	0.0952094	-0.212126	0.116917	0.28431	0.417959	0.277448	0.301196	-0.154164	0.534431	0.404506	0.2451	0.389915	0.365976	0.403319
ATM_Pathway_Cell_Survival	0.210562	-0.203056	0.189212	-0.00990396	-0.030128	0.0400319	-0.158844	0.166422	-0.123722	0.133388	-0.242873	-0.153189	0.00703798	-0.0635403	0.0493914	0.116088	0.0509585
ATM_Pathway_Checkpoint_Activation	0.273189	0.10639	0.217851	0.052184	-0.209427	0.157243	0.216385	0.268756	0.174163	0.153701	-0.179092	0.263516	0.218861	0.0888931	0.217215	0.270284	0.215559
ATM_Pathway_DNA_repair	0.140068	0.0680782	0.176835	-0.0679355	0.0995582	-0.0316227	0.0804214	0.183664	0.079953	0.0905664	-0.196019	0.129597	0.0515999	-0.154533	0.0198797	0.176926	0.0940248
ATM_Pathway_G2-Mitosis_progression	0.230597	0.0554225	0.169526	0.0677575	-0.114038	0.0462803	0.0520981	0.20623	0.0675246	0.194776	-0.114079	0.189269	0.198328	0.175477	0.249037	0.155642	0.153705
ATM_Pathway_NF-kB_Pathway	0.319992	0.161398	0.290715	0.00392231	-0.252475	0.248553	0.281454	0.313434	0.158349	0.238698	-0.192956	0.352229	0.217332	0.102514	0.148507	0.389824	0.217264
ATM_Pathway_Repair_and_Recombination	0.856728	-0.00632115	0.829961	0.103905	-0.289475	0.18557	0.291499	0.797638	-0.0281011	0.60096	-0.640218	-0.189425	0.380795	0.178542	0.535579	0.651528	0.386059
ATM_Pathway_S-phase_progression	0.0908085	0.315235	0.294898	-0.162811	-0.0463161	0.209127	0.292008	0.232086	0.193133	0.0971673	-0.191541	0.401355	0.0621092	-0.238578	0.0455356	0.202961	0.154895
BRCA1_Pathway	-0.0145247	-0.0381963	0.0313492	-0.0572215	0.0321891	0.0250324	-0.0214424	0.00601923	-0.0125451	0.0224546	-0.0238336	0.0123534	0.032749	0.0032874	0.0262572	-0.0248476	0.0156797
BRCA1_Pathway_Base_Excission_Repair	-0.128755	0.031842	0.171559	-0.278141	0.370332	-0.0921903	-0.0193253	0.00746254	0.0986771	0.0285118	-0.0220468	0.187944	-0.344932	-0.552106	-0.352734	0.0101438	0.0285997
BRCA1_Pathway_Cell_Cycle_Arrest_DNA_Repair_Genes_p21_WAF_CIP1_14-3-3_GADD45	-0.14889	-0.0723984	0.0775729	-0.16436	0.2578	-0.09344	-0.0682406	0.00626253	-0.0438658	0.0821977	-0.381316	0.12267	-0.26435	-0.602478	-0.19057	-0.0767078	-0.028724
BRCA1_Pathway_Chromatin_Remodeling	-0.0779876	-0.0497123	0.0231484	-0.127323	0.0708236	0.0564991	-0.0516199	-0.0104302	-0.0541615	-0.00106733	-0.0771251	0.0445316	0.0542286	-0.0264535	0.0365404	-0.0954955	0.0282809
BRCA1_Pathway_E2_Responsive_Genes	-0.00446128	0.0966441	0.147623	-0.108816	0.0723919	0.036424	0.0831931	0.0796701	0.154646	0.0506821	0.0455391	0.118556	-0.0817384	-0.251221	-0.0815644	0.0667748	0.0551593
BRCA1_Pathway_G1_S_arrest	0.246201	0.00720267	0.294111	-0.12411	-0.0705208	0.194631	0.064418	0.345283	0.0588214	0.349483	-0.549501	0.281536	0.0552224	-0.381128	0.186615	0.150269	0.14425
BRCA1_Pathway_Growth_Promoting_Genes_hTert_S100A7	-0.297275	-0.038271	-0.159737	-0.241016	0.172506	0.0685102	-0.0755052	-0.0490887	-0.179215	-0.214969	-0.581143	-0.0116142	-0.257698	-0.615683	-0.281503	0.0098474	-0.330663
BRCA1_Pathway_Homologous_Recombination_Repair	0.141216	-0.0468466	0.193166	-0.0422654	-0.00173734	0.0440027	0.024325	0.190787	-0.0522911	0.124906	-0.296132	-0.0391404	0.018633	-0.137118	0.0540094	0.118149	0.0592783
BRCA1_Pathway_Mismatch_Repair	-0.013253	-0.040228	0.0551027	-0.157677	0.11973	0.0379471	0.0424375	-0.00201016	0.0901984	0.0175636	0.00950084	0.20589	0.00663421	-0.114321	0.00463693	-0.0347197	0.0382031
BRCA1_Pathway_NHEJ_DSB_Repair	0.103094	0.0257832	0.148497	-0.077512	-0.0294562	0.106968	0.0924976	0.191466	0.0453618	0.110037	-0.363803	0.188981	0.0416584	-0.267706	0.0779197	0.113225	0.0939951
BRCA1_Pathway_Transciption_Coupled_Repair	-0.350351	-0.140823	-0.151359	-0.192454	0.263784	-0.0713298	-0.201517	-0.171296	-0.125817	-0.127275	-0.351813	-0.0790555	-0.277631	-0.720063	-0.186053	-0.362732	-0.14763
cAMP_Pathway	0.00277599	-0.0321689	0.059295	-0.0273933	-0.0139714	0.0413646	-0.0196097	0.00717228	0.0097766	0.0299871	-0.0280841	0.00362672	-0.0174741	-0.0441731	-0.0194383	0.028261	-0.0214304
cAMP_Pathway_Axonal_Growth	-0.24233	0.126843	-0.201251	0.00685078	0.227874	-0.234725	0.00774102	-0.185978	-0.0081445	-0.111149	0.27379	0.00518121	-0.0088607	-0.116522	0.039121	-0.272158	-0.114278
cAMP_Pathway_Cell_Growth	0.156398	-0.103206	0.188565	-0.071536	-0.201061	0.272597	0.0726031	0.106008	0.0601109	0.149847	-0.0545175	0.0640669	-0.121275	0.0517575	-0.1427	0.149652	0.0722648
cAMP_Pathway_Cell_Proliferation	-0.11051	0.121915	-0.0687114	0.0143805	0.0355156	-0.049896	0.169966	-0.0798203	0.293158	-0.0923203	0.227814	0.167866	0.026881	-0.040134	0.0295311	-0.120344	-8.64589e-05
cAMP_Pathway_Cell_Survival	0.0357678	-0.0276523	0.0656962	-0.0238301	-0.0842791	0.108109	0.0250061	0.0144189	0.0559677	0.0748599	0.0677807	0.00849034	-0.116692	-0.0415245	-0.108018	0.00118973	0.00711266
cAMP_Pathway_Chemotaxis	0.145913	-0.09801	0.173164	-0.0409071	-0.212136	0.253043	0.0681193	0.0939585	0.0577506	0.153245	-0.0589662	0.0366891	-0.137313	0.0460606	-0.145006	0.129831	0.0631253
cAMP_Pathway_Cytokine_Production	0.135127	-0.148414	0.14885	-0.040114	-0.186026	0.22614	0.0102563	0.0807109	0.00983577	0.118875	-0.0677869	-0.0101879	-0.141265	0.0345733	-0.146272	0.124067	0.0365502
cAMP_Pathway_Degradation_of_Cell_Cycle_Regulators	-0.131069	-0.158485	-0.0834681	0.114172	0.130041	-0.244213	-0.19581	-0.0644542	0.0134069	-0.152217	0.14506	-0.220603	0.0212817	-0.0525439	0.0107005	-0.173581	-0.0566527
cAMP_Pathway_Endothelial_Cell_Regulation	-0.047438	0.173985	0.0512942	-0.1352	0.086756	0.0484441	0.0907941	0.00694223	0.116543	0.00617178	0.149492	0.119058	-0.0713999	-0.113279	-0.102214	-0.096658	0.0176904
cAMP_Pathway_eNOS_Signaling_Cardiovascular_Homeostasis	-0.126482	0.127357	-0.107956	-0.0118747	0.0393845	-0.0275097	0.152699	-0.154	0.324098	-0.146714	0.27698	0.186471	0.0151731	-0.0443929	0.0311964	-0.153305	0.0316537
cAMP_Pathway_Fatty_Acid_Metabolism	0.151457	-0.162741	0.181146	-0.0174343	-0.151214	0.168649	-0.0371558	0.10127	0.019045	0.130767	-0.0152238	-0.0286505	-0.118279	0.0177956	-0.0918686	0.153208	0.029561
cAMP_Pathway_Gene_Expression_via_NFKB2_CREBBP_ELK1	0.0739647	-0.02234	0.0563169	0.0455547	0.031935	-0.0774897	0.0212365	0.0248337	0.0687874	0.051508	0.0815498	0.0065848	0.0696113	0.0517274	0.0978477	0.0559482	0.0224863
cAMP_Pathway_Glycogen_Synthesis	-0.0293995	0.221655	-0.025912	-0.0501229	0.0192386	0.0308843	0.225669	-0.0850979	0.347513	-0.0458893	0.237526	0.215468	0.0640221	-0.00100968	0.0716301	-0.0922746	0.0712041
cAMP_Pathway_Glycolisis	-0.117992	-0.147032	-0.100061	0.0398478	0.123483	-0.16333	-0.152175	-0.124601	-0.214523	0.0382552	-0.238873	0.027708	0.0569543	-0.0541688	0.025443	-0.15555	-0.0418989
cAMP_Pathway_Lipolysis	-0.18069	0.107956	-0.100562	-0.0166333	0.0336882	-0.0170549	0.145992	-0.162409	0.303246	-0.154587	0.270648	0.146496	0.0110481	-0.0344752	0.0166935	-0.214435	-0.0169615
cAMP_Pathway_Metabolic_Energy	-0.0447171	-0.226839	0.0691669	-0.0665855	0.0547125	0.011873	-0.222186	-0.118239	0.0526957	-0.00855243	-0.00585599	-0.098619	-0.201715	-0.136879	-0.174276	-0.0329546	-0.192611
cAMP_Pathway_Myocardial_Contraction	-0.0688854	-0.030853	-0.0120399	-0.0626576	-0.0137972	0.0764548	0.0380709	-0.0515147	0.0952594	0.00539739	-0.0275012	0.067808	0.00739676	-0.036768	0.00346357	-0.0082818	-0.0299739
cAMP_Pathway_Oncogenesis	-0.0581318	0.143214	-0.0195379	-0.0554099	-0.00321683	0.0586267	0.176438	-0.0972539	0.323759	-0.0179992	0.354024	0.295777	0.076461	-0.000709044	0.0529234	-0.097844	0.0629827
cAMP_Pathway_Protein_Retention	-0.207293	0.0409375	-0.100945	-0.14587	0.00676239	0.139107	0.140991	-0.157896	0.181894	-0.170536	0.20801	0.262069	0.0107872	-0.0451728	0.0127222	-0.196442	-0.11609
cAMP_Pathway_Regulation_of_Cytoskeleton	-0.133837	0.0738771	-0.0332479	0.01286	0.0576455	-0.0705055	0.0581577	-0.0865622	0.265609	-0.0877196	0.208954	0.102609	-0.0168421	-0.040129	0.0293612	-0.166327	0.00946872
Caspase_Cascade_Pathway	-0.0328132	0.0559499	-0.067599	-0.0409378	0.00786894	0.0330689	0.0324654	-0.0304551	0.0150962	-0.0492587	0.0149302	0.055143	0.0227679	0.01233	0.0394153	-0.0439439	0.0389454
Caspase_Cascade_Pathway_Activated_Tissue_Trans-glutaminase	-0.00162756	0.134608	0.0493945	-0.111224	-0.125668	0.236892	0.194727	0.0328638	0.19504	0.0887511	-0.0665516	0.194213	-0.0284721	-0.0130721	0.0346502	0.0275256	0.0593373
Caspase_Cascade_Pathway_DNA_Fragmentation	0.14801	0.371994	0.185325	-0.148558	-0.0855696	0.234127	0.303649	0.195515	0.42261	0.178539	0.119954	0.488937	0.105221	0.0864988	0.205057	0.0819249	0.208006
CD40_Pathway	0.212012	-0.108893	0.163594	0.160094	0.0402983	-0.200392	-0.0170268	0.179273	-0.0895051	0.191786	-0.0909076	-0.195638	0.0651787	0.104802	0.0931944	0.187085	0.0108988
CD40_Pathway_Cell_Survival	-0.358334	-0.00895128	-0.450929	-0.0860905	0.0923945	-0.00630399	0.104067	-0.449348	-0.160483	-0.294128	-0.143601	0.00987636	-0.108434	-0.161437	-0.0921053	-0.086724	-0.153127
CD40_Pathway_Gene_Expression_Cell_Adhesion_Molecule_via_NFKB2	0.259326	-0.167249	0.235139	0.137853	-0.10099	-0.0368633	-0.14393	0.19126	-0.133664	0.175186	-0.061829	-0.3407	-0.102622	0.0547914	-0.0700363	0.218697	-0.0868383
Cellular_Apoptosis_Pathway	0.00345313	0.0351725	-0.058117	-0.011516	-0.016312	0.027828	0.0265435	-0.0165514	-0.0130933	-0.0253924	0.0365595	0.0895649	0.0236753	0.0385324	0.0384848	-0.0365811	0.0642767
Cellular_Apoptosis_Pathway_Depolarization	-0.311608	0.0970236	-0.416624	0.175336	0.019177	-0.194513	-0.124451	-0.33349	0.445308	-0.16467	0.577536	0.813265	-0.0542348	-0.0445929	-0.018264	-0.326096	0.0347117
Cellular_Apoptosis_Pathway_DNA_Fragmentation	-0.134954	-0.118136	-0.0895429	-0.0721177	0.0521067	0.020011	-0.0535689	-0.166996	-0.0459224	-0.0978546	-0.0207588	-0.0743608	-0.150586	-0.0780764	-0.0500474	-0.116048	-0.0651616
Cellular_Apoptosis_Pathway_Gene_Expression_BAX_BID_BAK_Ras_Noxa_PUMA_APAF1_Survivin_BCL2_via_TP53	0.147359	0.104274	0.0736905	0.109669	-0.187456	0.0777864	0.0939562	0.13746	0.572106	0.302841	0.251954	0.765916	0.0579926	0.0407483	0.0954226	0.187167	0.112555
Cellular_Apoptosis_Pathway_Gene_Expression_FLIP_CIAP2_BFL1_BCL2_via_NFKB2	0.280937	-0.181186	0.254734	0.149341	-0.109406	-0.0399353	-0.155925	0.207198	-0.144802	0.189785	-0.0669814	-0.369092	-0.111174	0.0593574	-0.0758727	0.236922	-0.0940748
Chemokine_Pathway	-0.0132098	-0.0648102	0.0256587	0.00888678	-0.0343956	0.0255088	-0.0559533	-0.0157836	0.0357101	0.0476279	-0.0896441	-0.0950468	-0.00302065	0.00526639	0.0240067	-0.0433615	-0.030035
Chemokine_Pathway_Cell_Activation	-0.00303917	-0.352642	0.00972404	0.0622023	0.011872	-0.0740744	-0.280598	-0.0252644	-0.119155	-0.018909	0.0698749	-0.205134	-0.0428707	-0.0719383	0.000124419	-0.0100786	-0.145006
Chemokine_Pathway_Gene_Expression_and_Apoptosis_via_ELK1	-0.068817	-0.328661	-0.0796855	0.0284333	0.0264031	-0.0548364	-0.1978	-0.0754658	-0.126532	-0.0686945	-0.00522352	-0.15038	0.0232303	-0.0168253	0.00268559	-0.167748	-0.118508
Chemokine_Pathway_Internalization_Degradation_Recycling	0.189195	-0.196587	0.0660232	-0.0598757	-0.0625537	0.122429	-0.0445121	0.0768366	-0.130161	0.212845	-0.486527	-0.424039	0.0342161	0.0352482	0.0303037	0.0845914	0.095173
Chromatin_Pathway	-0.0175244	-0.00840715	0.0872937	0.0796479	0.00313188	-0.0827798	-0.0480407	0.0159709	-0.0972214	0.0927966	0.0883141	-0.00219963	0.0712958	-0.00100695	-0.0132306	0.00729478	0.0427241
Circadian_Pathway	0.311012	-0.101079	-0.0603685	-0.219019	-0.0166885	0.235707	-0.0452663	0.183214	-0.362055	0.0763841	-0.531724	-0.298155	-0.103766	0.00883869	0.0789012	0.347548	0.0114665
CREB_Pathway	0.0387731	-0.0432092	0.102418	-0.016642	-0.00272236	0.0193643	0.0083782	0.0416031	0.0175857	0.0939462	-0.129056	-0.046984	-0.0200403	-0.00395286	-0.0125106	0.0737956	-0.0141485
Cytokine_Network_Pathway	-0.150099	-0.361021	0.086029	-0.540057	0.260507	0.27955	-0.39457	-0.0679314	-0.258577	-0.022077	-0.0296014	0.140369	-0.326441	-0.0136279	-0.212687	-0.134274	-0.302874
EGF_Pathway	-0.00710797	-0.040567	0.0755658	0.108289	0.0120967	-0.120386	-0.0135391	0.0350006	0.0437215	0.0655944	-0.00226976	-0.160629	0.0130308	-0.0131479	-0.00492404	-0.0256468	-0.10269
EGF_Pathway_Actin_Cytoskeletal_Rearrangement	-0.220066	0.198883	0.033544	0.13578	0.150564	-0.286344	0.0115735	-0.0213462	0.246514	-0.0376657	0.396425	-0.0522846	0.00366544	-0.0157014	-0.0383999	-0.255288	-0.065306
EGF_Pathway_Cell_Motility	-0.879799	0.0789452	-0.541465	-0.0748382	-0.0786377	0.153476	-0.143007	-0.775292	0.0913124	-0.680608	0.185675	0.0801101	-0.468702	-0.399863	-0.503302	-0.810722	-0.453244
EGF_Pathway_Cell_Survival	-0.108103	0.0613641	-0.0505194	0.0426569	0.0621208	-0.104778	0.0158662	-0.114113	0.108627	-0.0775947	0.0254117	-0.0730644	-0.0263711	-0.0636228	0.0266557	-0.12783	-0.191663
EGF_Pathway_Cytoskeleton_Regulation	-0.220615	0.196188	0.0304532	-0.126357	-0.0512797	0.177637	0.124432	-0.0910929	0.267999	-0.174829	0.0643861	0.475366	-0.169884	-0.160216	-0.320707	-0.131499	-0.124516
EGF_Pathway_EGFR_Endocytosis	-0.532712	0.0908947	-0.24369	-0.104014	-0.151616	0.255629	-0.118405	-0.310876	0.111635	-0.453031	0.113763	0.207647	-0.36712	-0.334066	-0.455471	-0.327099	-0.309959
EGF_Pathway_Gene_Expression_via_FOS_NFKB2_MYC_STAT1_ELK1_STAT3_JUN	0.059704	-0.212119	0.083746	0.128496	-0.00983391	-0.118663	-0.150814	0.0676512	-0.0942462	0.0752791	-0.161797	-0.414459	-0.031653	-0.0354154	-0.0225689	0.0614957	-0.180089
EGF_Pathway_IP3_Signaling	-0.687218	-0.126275	-0.44799	-0.0191571	-0.0814063	0.100563	-0.351329	-0.603922	-0.156136	-0.328296	-0.0468994	-0.00414149	-0.43024	-0.42891	-0.510002	-0.621628	-0.604324
EGF_Pathway_Rab5_Regulation_Pathway	-0.480302	-0.309635	-0.565896	0.271389	-0.0732917	-0.198097	-0.161033	-0.49379	-0.100519	-0.549538	0.00526595	-0.385543	-0.517682	-0.307587	-0.531424	-0.675376	-0.313983
ErbB_Family_Pathway	0.00482674	-0.0386607	0.121825	0.012323	0.00148867	-0.0138117	-0.00491687	0.0306145	0.0488734	0.0828181	0.0677331	-0.0374931	-0.0226828	-0.0500033	-0.0710079	0.0441484	-0.125138
ErbB_Family_Pathway_Anti-Apoptosis	0.0923234	-0.20343	0.0629968	0.177711	-0.162583	-0.0151282	0.0163922	0.231959	0.118032	0.255868	0.205601	0.190192	0.10552	-0.0702114	0.166415	-0.137164	0.00737768
ErbB_Family_Pathway_Gene_Expression_via_JUN_FOS_ELK1	0.0648675	-0.316234	0.0860443	0.115693	0.0206367	-0.13633	-0.216284	0.0499025	-0.134162	0.146166	-0.141129	-0.374324	0.0521194	-0.0511918	0.016338	0.051625	-0.197948
ErbB_Family_Pathway_Translation	-0.167632	0.360947	0.120734	-0.178695	-0.274746	0.453441	0.693442	-0.132166	0.799894	0.0978453	0.801023	0.842175	0.174341	-0.0635807	-0.17013	-0.297574	0.0613447
ERK_Signaling_Pathway	-0.000271037	-0.0438506	0.059491	-0.0392115	-0.0168757	0.0560872	-0.0190314	0.0122511	-0.0173271	0.0482703	-0.100885	-0.0350137	-0.0243239	-0.023867	-0.0192335	0.0189536	-0.0353438
ERK_Signaling_Pathway_Cell_Survival	0.266131	0.0547045	0.255785	0.389126	-0.505835	0.116709	0.337695	0.167033	0.322232	0.306598	0.56978	0.11522	0.138095	0.302219	0.0755715	0.222826	0.0372319
ERK_Signaling_Pathway_EGFR_signaling	0.0651693	0.105046	0.0454953	0.0614363	0.0526245	-0.114061	0.180417	0.00476143	0.179641	0.112013	0.260729	-0.0176599	0.0670082	0.0105816	-0.0831166	0.128587	0.0324201
ERK_Signaling_Pathway_Gene_Expression_via_CAPN6_TP53_FOS_ATF1_MYC_ELK3_MYLK_ETS1_SRF_HIST1H3B_CREB3_STAT3_NFKB2_HMGN1_ESR2_ELK1_PAX6_JUN	0.186069	-0.0232224	0.160384	0.104779	-0.0154267	-0.0893519	0.0664219	0.188293	0.00630897	0.193676	-0.0998372	-0.251851	0.022089	-0.0075719	0.0452339	0.181527	0.0156567
ERK_Signaling_Pathway_Translation	0.174932	0.113445	0.0786476	0.117281	0.0439241	-0.161205	0.171373	0.067698	0.173051	0.169503	0.193753	0.0338545	0.208198	0.118115	0.114266	0.154617	0.185662
Erythropoietin_Pathway	0.0355668	-0.0836038	0.0697181	0.101017	-0.023026	-0.0779905	-0.0575069	0.00718002	-0.0100031	0.0791176	0.00386609	-0.091921	0.0404677	0.0356157	0.0373411	0.0159934	-0.0129807
Erythropoietin_Pathway_Anti-Apoptosis	-0.231814	0.154113	-0.0680283	0.179156	0.109149	-0.288305	0.0867513	-0.074581	0.0150239	-0.0568225	0.472866	0.128472	-0.018625	-0.117225	-0.0392205	-0.287886	-0.0591313
Erythropoietin_Pathway_BCLXL_Gene_Expression_via_STAT5B	0.0363156	-0.0109857	0.0696966	0.0422877	-0.0234502	-0.0188375	-0.0563716	-0.020736	-0.0580492	-0.179457	0.0282148	-0.0465198	0.16082	0.0589724	0.236333	-0.0818798	0.108604
Erythropoietin_Pathway_Cell_Cycle_Progression	0.393009	-0.0848016	0.244133	0.263238	0.103153	-0.366391	0.0706614	0.335538	-0.0534287	0.524998	-0.19066	-0.243681	0.401999	0.270691	0.427403	0.370681	0.24457
Erythropoietin_Pathway_Cell_Survival	0.0335878	-0.0455073	0.00965742	0.119636	-0.0284255	-0.0912103	-0.0334306	-0.0280037	0.0309939	0.0656635	0.0153985	-0.108132	0.0740666	0.0660316	0.0907987	0.00975201	-0.0149517
Erythropoietin_Pathway_Gene_Expression_Neuroprotection_via_NFKB2	0.274966	0.0162784	0.202903	0.126233	-0.0828282	-0.0434052	0.0421124	0.199388	0.020992	0.201984	0.041938	-0.0904388	0.152504	0.271328	0.176195	0.241012	0.0969453
Erythropoietin_Pathway_GPI_Hidrolysis_and_Ca2+_influx	-0.0319232	-0.23534	-0.0540558	0.055921	-0.0434277	-0.0124933	-0.242427	-0.12536	-0.110995	0.15036	-0.0309575	0.0874404	0.152488	-0.0310056	0.105834	-0.0208989	-0.209236
Estrogen_Pathway	0.00363219	-0.0889894	0.0598582	-0.0113061	0.00560846	0.00569759	-0.0720082	-0.00928436	-0.0509997	0.0426255	-0.0829805	-0.082026	-0.0905774	-0.0636489	-0.0738092	0.0357296	-0.0603717
Estrogen_Pathway_Anti-Apoptosis	-0.0925348	-0.036225	-0.0298842	0.00166706	0.111696	-0.113363	0.0102447	-0.0925907	0.123641	0.0328265	-0.0833292	-0.294404	-0.106754	-0.109782	-0.0214032	-0.0875231	-0.110629
Estrogen_Pathway_Gene_Expression_via_FOS_JUN_ELK1_SP1_POLR2B_CREB3_NFKB2	-0.0346939	-0.113044	0.00597589	0.0483895	0.0445678	-0.0929573	-0.115086	-0.0694542	-0.0652402	0.0379395	-0.0502106	-0.220445	-0.141657	-0.0778342	-0.0660638	-0.0459429	-0.0578852
Estrogen_Pathway_Vasodilatation	-0.667264	-0.236837	-1.10783	-0.0805887	0.0611289	0.0194599	-0.346142	-1.17489	-0.00977474	-1.24322	0.296885	-0.338932	-0.127721	-0.260031	-0.117773	-0.813874	-0.0350421
FLT3_Signaling_Pathway	0.0675991	0.00585448	0.124685	0.132167	-0.0411314	-0.0910356	0.0847897	0.0775981	0.0921154	0.13658	0.10919	-0.113197	0.110492	0.0515687	0.0970853	0.0308368	0.00594787
FLT3_Signaling_Pathway_Transcription_via_ELK3_MAPK12_CREB3_STAT2	0.201411	-0.00925472	0.213487	0.176179	-0.0938446	-0.0823349	0.114345	0.162995	0.070311	0.234412	0.112954	-0.0893946	0.194165	0.13295	0.143881	0.120302	0.102537
FLT3_Signaling_Pathway_Translation	0.114098	0.31436	0.231008	0.331399	-0.525194	0.193795	0.674639	0.169238	0.643755	0.260829	0.787887	0.450971	0.262973	0.289161	0.0669799	0.23358	0.142653
Glucocorticoid_Receptor_Signaling_Pathway	-0.0136425	0.0902982	-0.00304764	-0.0294852	0.0644288	-0.0349436	0.0582448	0.00402691	0.0789146	-0.0402311	0.10132	0.055975	0.0161024	-0.0212626	0.00105736	0.0108829	0.0327431
Glucocorticoid_Receptor_Signaling_Pathway_Cell_Cycle_Arrest	-0.0404881	0.333959	0.177907	0.0246229	-0.53424	0.509617	0.259254	-0.0417221	0.555892	0.251002	0.611178	0.603821	-0.0126601	0.0259894	0.0571954	-0.0147048	0.288653
Glucocorticoid_Receptor_Signaling_Pathway_Cell_Cycle_Progression	0.0894311	0.44026	0.133064	-0.114312	0.103277	0.0110342	0.439604	0.0674501	0.31256	0.122225	0.23537	0.455041	0.327122	0.246742	0.199199	0.147685	0.220497
Glucocorticoid_Receptor_Signaling_Pathway_Gene_Expression_via_CREB3_STAT5B_SLC22A2_POU2F1	0.111099	0.334984	0.159967	-0.0603431	0.0690466	-0.00870348	0.330803	0.0791941	0.204463	0.143462	0.160299	0.329444	0.29381	0.190137	0.200141	0.0844683	0.222267
Glucocorticoid_Receptor_Signaling_Pathway_Histone_Deacetylation	0.174866	-0.233301	0.157313	-0.0868213	0.0461592	0.0406621	-0.244045	-0.0745485	0.0623822	0.314067	-1.46031e-06	-0.117193	-0.330902	0.144664	-0.189407	-0.0871322	0.0295252
Glucocorticoid_Receptor_Signaling_Pathway_Inflammatory_Cytokines	-0.0174143	0.229076	0.0140658	-0.106954	0.0446122	0.0623413	0.187459	0.0179839	0.195605	0.00749642	0.104394	0.220473	0.102806	0.0375736	0.0467733	0.0490566	0.0757953
GPCR_Pathway	-0.00202746	-0.069741	0.074169	-0.00204708	0.0122533	-0.0102062	-0.0495894	0.00536983	-0.00350824	0.0849896	-0.0956682	-0.145928	-0.0616819	-0.0693161	-0.0395062	0.00310829	-0.0695041
GPCR_Pathway_Gene_Expression_via_JUN_NFKB2_ELK1_SRF_FOS_CREB3	0.0753444	-0.0616647	0.146079	0.0340072	0.0421076	-0.0761147	-0.0311956	0.0843318	0.0010892	0.155228	-0.0874816	-0.210645	-0.0214882	-0.0111668	0.0364882	0.0561646	-0.032059
Growth_Hormone_Signaling_Pathway	0.0631457	-0.0926347	0.137011	0.082841	-0.0219856	-0.0608554	-0.0298929	0.0466487	0.0612741	0.0697738	0.0556344	-0.15932	0.0250305	0.011781	0.0304669	0.0868405	-0.1146
Growth_Hormone_Signaling_Pathway_Cell_Survival	-0.0320117	0.00719737	0.0840465	0.0131154	0.224161	-0.237277	-0.0195779	-0.025694	0.141205	-0.0476656	0.0341903	-0.204538	-0.0676965	-0.0368383	0.0155304	0.0464126	-0.149386
Growth_Hormone_Signaling_Pathway_Gene_Expression_via_SRF_ELK1_STAT5B_CEBPD_STAT1_STAT3	0.0572396	-0.12559	0.114031	0.0853184	-0.0370725	-0.0482459	-0.0565249	0.0259986	0.0362965	0.0609481	0.052874	-0.192734	0.0106643	-0.0074928	0.0123475	0.0746233	-0.13725
Growth_Hormone_Signaling_Pathway_Glucose_Uptake	-0.1205	0.0140383	-0.0261029	-0.00639272	0.210122	-0.203729	-0.0209543	-0.153372	0.149309	-0.138817	0.13564	-0.221918	-0.118667	-0.0761518	-0.0342597	-0.064472	-0.206286
Growth_Hormone_Signaling_Pathway_Protein_Synthesis	0.10374	0.197241	0.449499	0.00397989	0.168381	-0.172361	0.174399	0.222037	0.274256	0.126342	-0.0625999	0.173416	-0.237502	0.0724735	-0.179334	0.415692	-0.0154404
GSK3_Signaling_Pathway	0.000519101	0.0518292	-0.0688073	0.0166391	-0.00745135	-0.00918777	0.0286433	-0.0179974	0.0499046	-0.0338913	0.0793989	0.0256754	0.0467284	0.0312072	0.05804	-0.0436881	0.0356521
GSK3_Signaling_Pathway_b-CTNN_Degradation	-0.000884256	0.133599	-0.045093	0.0294812	0.0958415	-0.125323	0.00746199	-0.00459442	0.199667	0.094441	0.147099	-0.0825728	0.103894	-0.00649164	0.144209	0.0211342	-0.030985
GSK3_Signaling_Pathway_Gene_Expression_via_CTNNB1	0.0748513	0.115092	0.00694597	0.0345157	0.0342568	-0.0687725	0.0831872	0.0492202	0.115089	0.0406122	0.0537588	-0.051226	0.0849706	0.0616864	0.118584	0.0764158	0.0415577
GSK3_Signaling_Pathway_Glycogen_Synthesis	0.00992753	0.233015	-0.0224899	-0.0221289	0.00747086	0.014658	0.165769	-0.0287506	0.0931483	-0.135681	-0.0828327	0.0430698	0.0300273	0.0495827	0.0449317	0.112316	0.0768244
GSK3_Signaling_Pathway_Protein_Synthesis	-0.00653879	0.16886	0.0139605	0.035381	0.00651454	-0.0418955	0.171564	0.00814445	0.109613	-0.0906312	-0.023663	0.0858067	0.00372676	0.0383166	0.0203381	0.104647	0.0540011
HA_syntesis_pathway	-0.00391824	-0.0756005	-0.0378443	0.207367	-0.045667	-0.1617	-0.0564561	-0.037076	-0.0940806	0.014116	-0.0311046	-0.166446	0.113175	0.0397892	0.110423	-0.00373255	0.052841
Hedgehog_Signaling_in_Mammals_no_Tubulin_Pathway	-0.182217	-0.433311	-0.098912	-0.0631417	0.178575	-0.115433	-0.449314	-0.20363	-0.337681	-0.0139168	-0.352853	-0.426993	-0.20476	-0.229764	-0.206551	-0.214263	-0.229946
Hedgehog_Signaling_in_Mammals_Pathway	0.140654	-0.08841	0.160967	-0.0530323	-0.141407	0.194439	0.00411435	0.126678	0.120525	0.194915	-0.0922795	0.00060173	-0.117733	0.022945	-0.109956	0.0923964	0.0857637
HGF_Pathway	-0.014226	-0.103922	0.0471738	-0.0391787	0.0292158	0.00996297	-0.0871184	-0.00922133	-0.0397382	0.0848912	-0.0727421	-0.118144	0.0317386	-0.00909105	0.0606751	-0.0254288	-0.0758222
HGF_Pathway_Anoikis	0.0761724	-0.0413562	0.152272	-0.0477457	0.120858	-0.0731122	-0.116333	0.052725	0.00129463	0.122636	-0.0353781	-0.180478	-0.0409533	-0.0756792	0.0265759	0.0408402	-0.134254
HGF_Pathway_Cell_Adhesion_and_Cell_Migration	-0.165969	-0.208636	-0.0789773	-0.194166	-0.00323982	0.197406	-0.123543	-0.125356	-0.111577	-0.0335001	-0.123927	-0.0427377	0.00956881	-0.0362712	-0.0252226	-0.182852	-0.106225
HGF_Pathway_Cell_Cycle_Progression	0.123509	-0.245378	0.134047	-0.0939763	0.0984652	-0.00448891	-0.363964	0.0879093	-0.355946	0.163617	-0.256843	-0.295555	-0.0918052	-0.132913	-0.0872193	0.0178911	-0.178071
HGF_Pathway_Cell_Scattering	-0.00458156	0.143825	0.128432	-0.0201836	0.144603	-0.124419	0.0980107	-0.015285	0.316968	0.0269124	0.167601	-0.099567	-0.0295971	-0.0359074	0.0793752	0.0424784	-0.105386
HGF_Pathway_Gene_Expression_via_JUN_STAT3_FOS_ELK1_ETS2	0.206897	-0.156307	0.193951	0.0362135	0.0961101	-0.132324	-0.187744	0.167898	-0.224644	0.251625	-0.226164	-0.283989	0.0644134	0.0353754	0.0807347	0.149676	-0.0434251
HGF_Pathway_IP3_Pathway	0.147206	-0.350191	0.123326	0.0829855	-0.0912879	0.00830233	-0.214031	0.00184423	-0.224324	0.39625	-0.301187	-0.0318822	0.176096	0.180819	0.150356	0.120425	-0.0713049
HGF_Pathway_PKC_Pathway	0.0669037	-0.239806	0.204362	0.206585	-0.0657406	-0.140844	-0.122952	0.0695684	0.00810451	0.159836	-0.105538	-0.160956	0.204107	-0.0185943	0.168616	0.168674	-0.143381
HGF_Pathway_Regulation_of_Cytoskeleton_Cell_Polarity_and_Cell_Motility	0.0809132	0.168676	0.144704	0.0893331	-0.132367	0.0430341	0.156828	0.134889	0.129442	0.151318	0.124736	0.190976	0.176256	0.143448	0.249488	0.030402	0.122472
HIF1Alpha_Pathway	0.0768548	0.119539	0.0812453	-0.0625159	0.0063225	0.0561934	0.0149098	0.0582916	0.184344	0.159259	0.0279103	0.256713	0.160778	0.165421	0.157864	-0.00155554	0.125986
HIF1Alpha_Pathway_Gene_Expression_via_JUN_CREB3	0.0962558	-0.262483	0.147953	-0.0915042	-0.0316779	0.123182	-0.262326	0.0682746	-0.226666	0.183306	-0.294225	-0.22273	-0.0589836	-0.0490896	-0.0465195	0.0431199	-0.0359691
HIF1Alpha_Pathway_HIF1a_Degradation	-0.151587	-0.856292	0.0645699	0.148548	-0.0274051	-0.121143	-0.414957	-0.0293745	-0.703168	-0.330784	-0.7322	-0.856833	-0.371206	-0.410066	-0.415357	0.0453435	-0.249438
HIF1Alpha_Pathway_NOS_Pathway	0.0502764	-0.268021	0.100453	-0.0785991	-0.0474472	0.126046	-0.244248	0.0267704	-0.23191	0.158046	-0.263727	-0.206541	-0.0337782	-0.0139872	-0.0397572	0.0349406	-0.0749738
HIF1Alpha_Pathway_p53_Hypoxia_Pathway	0.0440615	0.177583	0.0398406	-0.0495145	0.00227789	0.0472366	0.0712886	0.0299045	0.247253	0.139084	0.0995435	0.344487	0.212485	0.222666	0.195192	-0.0140382	0.126944
IGF1R_Signaling_Pathway	0.0544721	-0.0362621	0.08357	-0.00377701	0.038235	-0.0344579	-0.0139644	0.0739451	-0.0190308	0.102747	-0.0720563	-0.0406377	0.0754245	0.0502267	0.0610185	0.056777	0.00138128
IGF1R_Signaling_Pathway_Apoptosis	0.230688	0.0995134	0.0813358	0.114859	0.0474712	-0.16233	0.0334641	0.14166	0.00425881	0.10877	-0.00129577	0.179542	0.415869	0.375264	0.329507	0.244201	0.25648
IGF1R_Signaling_Pathway_Cell_Migration	-0.0762265	-0.183279	0.0408312	-0.200646	0.0451122	0.155534	-0.0519964	0.0400772	-0.133595	0.0290863	-0.237366	-0.0179616	0.0194378	0.0102991	-0.0332254	0.0259457	-0.0983039
IGF1R_Signaling_Pathway_Cell_Proliferation_Diferentiation_and_Apoptosis	0.215728	-0.171237	0.171714	0.170534	0.036714	-0.207248	-0.0715522	0.223269	-0.0943446	0.251643	-0.066054	-0.206712	0.184575	0.140689	0.231048	0.189024	0.0644618
IGF1R_Signaling_Pathway_Cell_Survival	0.0970311	0.158111	0.107963	0.200907	0.0191284	-0.220036	0.18868	0.217392	0.0174985	0.325257	0.304758	0.265629	0.131694	0.0127868	0.179804	-0.056885	-0.0379969
IGF1R_Signaling_Pathway_Gene_Expression_Proliferation_Growth_Survival_via_NFAT5_CREB3	0.205173	0.0773254	0.187526	-0.0638014	0.104895	-0.041094	-0.0398252	0.149108	0.0225485	0.189597	-0.236326	0.0281113	0.101892	0.0822042	0.170612	0.167697	0.143802
IGF1R_Signaling_Pathway_Glucose_Uptake	0.18461	-0.234564	0.337657	0.317827	-0.0714873	-0.246339	-0.0958802	0.295704	0.00623279	0.502362	0.0733653	-0.243174	-0.0505349	-0.0555615	-0.0176014	0.0506284	-0.538192
IGF1R_Signaling_Pathway_Glycogen_Synthesis	0.331497	0.104166	0.259686	-0.090566	-0.174496	0.265062	0.176798	0.207646	0.236425	0.437959	0.237017	0.304954	0.294334	0.0625995	0.316985	0.164967	0.113706
IGF1R_Signaling_Pathway_Protein_Synthesis	0.0636204	0.31586	0.0786071	-0.0625634	0.00132111	0.0612423	0.195599	-0.0122945	0.268279	0.106754	0.261594	0.327165	0.282714	0.14641	0.161403	0.0229555	0.20546
IL-10_Pathway	-0.00417299	-0.129555	0.0462299	0.0790446	0.120869	-0.199913	-0.111294	-0.0227083	-0.0238539	-0.00304465	-0.0107998	-0.266404	-0.0369488	0.0167579	0.00760211	-0.0102601	-0.102664
IL-10_Pathway_IL-10_Responsive_Genes_Transcription_of_BCLXL_Cyclin-D1_D2_D3_Pim1_c-Myc_and_P19(INK4D)_via_STAT3	-0.0986359	-0.146326	-0.0411999	0.0325645	0.157706	-0.19027	-0.139484	-0.108562	-0.0208153	-0.0848231	0.0389531	-0.324256	-0.0878067	-0.0787642	-0.0532959	-0.0796493	-0.198174
IL-10_Pathway_Stability_Determination	-0.321831	0.296581	-0.032739	-0.0507906	0.0452357	0.00555494	0.216147	-0.240719	0.256364	-0.115278	0.266597	0.497059	-0.164582	0.00859598	-0.0456285	-0.3313	0.240337
IL-10_Pathway_Translational_Modulation	-0.00118141	-0.286961	-0.0315834	0.104162	0.0748848	-0.179047	-0.208338	-0.0616042	-0.215762	0.0292145	-0.115586	-0.214556	-0.0281063	0.00363867	-0.0281571	-0.0994946	-0.00949531
IL-2_Pathway	0.0409012	-0.0585862	0.0997062	0.00801789	0.0330082	-0.0410261	-0.0377156	0.0589748	0.0310584	0.11016	-0.052259	-0.130464	0.0252001	-0.0150638	0.0885096	0.0416698	-0.0451837
IL-2_Pathway_Actin_Reorganization	0.385212	0.233152	0.251822	-0.383003	0.0161947	0.366809	0.216112	0.230098	0.135366	0.640648	-0.143858	0.345764	0.34261	0.111103	0.263283	0.143587	0.0464023
IL-2_Pathway_Apoptosis	0.238152	-0.4017	0.177785	0.0852244	-0.0861428	0.000918406	0.0437219	0.251074	-0.0113538	0.18791	0.0786486	0.105517	0.108939	0.0800673	0.185309	0.127861	0.160407
IL-2_Pathway_Apoptosis_Inhibition	-0.15617	0.0947446	0.0358045	0.0322136	0.188036	-0.220249	0.0647157	-0.114158	0.255353	-0.0813983	0.201683	-0.188909	-0.112464	-0.105976	-0.010232	-0.138914	-0.163692
IL-2_Pathway_Gene_Expression_via_FYN_LYN_RPS6KB1_PTK2B	0.0344835	0.0123033	0.0845201	0.138769	-0.00409691	-0.134672	0.145474	0.10654	0.0702923	0.154942	-0.068707	-0.0904403	0.115452	0.0101935	0.141965	-0.0800289	-0.0599985
IL-2_Pathway_IL2_Gene_Expression_via_POLR1E_EGR1_HMGA1_ELF1_POU2F1_MYC	0.00653915	-0.164215	0.00168264	-0.0192278	0.0558536	-0.0366258	-0.192262	0.0272958	-0.055082	-0.0178342	-0.0927453	-0.279715	-0.114393	-0.109179	-0.0362443	0.00899523	-0.11322
IL-2_Pathway_Protein_Synthesis	-0.219159	-0.0672274	0.0207813	-0.0288897	0.207947	-0.179057	0.183738	-0.0776409	-0.00568188	-0.0818404	-0.0568998	-0.0462099	0.0820444	0.0372835	-0.0970052	-0.196986	-0.0947685
IL-6_Pathway	0.0307571	-0.0390627	0.118093	0.0307377	0.0234817	-0.0542194	-0.00709078	0.0569918	0.0279915	0.085797	0.0686423	-0.117978	-0.0480604	-0.0532959	-0.0432049	0.0234995	-0.019085
ILK_Signaling_Pathway	0.00295969	-0.0626732	0.0535047	-0.0455463	-0.000382672	0.045929	-0.0368841	0.00857049	-0.0627161	0.0404075	-0.0987244	-0.0528787	-0.0480509	-0.0473274	-0.0394628	0.0180783	-0.0593451
ILK_Signaling_Pathway_Actin_Polymerization_Cytoskeletal_Reorganization	0.330241	0.209605	0.266751	-0.119842	-0.0941795	0.214022	0.223018	0.321625	0.00729561	0.435687	0.0752109	0.257797	0.150785	0.0455033	0.240623	0.231346	0.179769
ILK_Signaling_Pathway_Apoptosis	0.0389103	0.070111	0.110363	-0.00267871	0.0187741	-0.0160954	0.112682	0.0933379	0.0940847	0.0712073	0.0842333	-0.0418398	0.0108122	-0.129221	0.0353586	-0.00178326	-0.110769
ILK_Signaling_Pathway_Cell_Adhesion	0.31502	0.358525	0.505438	-0.0419016	0.112901	-0.0709994	0.32359	0.36998	0.484807	0.457744	0.101909	0.239096	0.143145	0.0955037	0.261152	0.238493	0.143829
ILK_Signaling_Pathway_Cell_Cycle_Proliferation	-0.113158	-0.128487	-0.026277	-0.187683	0.113881	0.0738011	-0.0621385	-0.0750737	-0.0662463	-0.0310452	-0.147728	-0.0930008	-0.01947	-0.0118855	-0.0119579	-0.0483302	-0.137059
ILK_Signaling_Pathway_Cell_Migration_Retraction	-0.118243	-0.132875	-0.0396206	-0.185036	0.10349	0.0815454	-0.0623903	-0.0868172	-0.0570215	-0.0299029	-0.12382	-0.0870766	-0.0210719	-0.00749525	-0.0126855	-0.0678692	-0.144565
ILK_Signaling_Pathway_Cell_Motility	0.335189	0.219611	0.296309	-0.109278	-0.06589	0.175168	0.217645	0.326291	0.0656688	0.423387	0.0681377	0.23696	0.157561	0.0674812	0.250716	0.231912	0.171762
ILK_Signaling_Pathway_Cytoskeletal_Adhesion_Complexes	-0.0763299	-0.0526543	-0.0172929	-0.156817	0.00183412	0.154983	-0.0694136	-0.0663736	-0.0784369	0.00461824	-0.167134	-0.0458711	-0.074787	-0.0797168	-0.0677195	-0.0635612	-0.0699121
ILK_Signaling_Pathway_Epithelial_Mesenchymal_Transition	0.118466	-0.105	0.101912	0.118533	0.0387686	-0.157302	-0.0221787	0.14561	-0.147676	0.0857924	0.0491252	-0.155095	0.171962	0.160504	0.158664	0.0664322	-0.0364076
ILK_Signaling_Pathway_Epithelial_Mesenchymal_Transition_Tubulo-Interstitial_Fibrosis	-0.0815969	-0.0430108	-0.0141638	-0.130081	0.0289442	0.101137	-0.0616371	-0.0745416	-0.0453989	-0.010708	-0.129576	-0.0613752	-0.0699324	-0.0717694	-0.059778	-0.0635153	-0.0886251
ILK_Signaling_Pathway_Induced_Cell_Proliferation	0.352497	-0.036047	0.388348	0.245887	-0.363054	0.117167	0.150706	0.257586	0.105673	0.327875	-0.0112113	-0.0550809	0.158029	0.10936	0.129354	0.22515	0.252881
ILK_Signaling_Pathway_Loss_of_Occludin_Barrier_Dysfunction	-0.115656	-0.2089	-0.0711864	-0.183333	0.0432379	0.140095	-0.0725739	-0.0303549	-0.186269	0.00867977	-0.269327	-0.0698886	0.00627571	-0.0113104	-0.0099873	-0.100819	-0.0892335
ILK_Signaling_Pathway_MMP2_MMP9_Gene_Expression_Tissue_Invasion_via_FOS	0.154514	-0.0314196	0.0895084	-0.106843	0.0996278	0.00721517	-0.0637549	0.210792	-0.00196609	0.1123	-0.308137	-0.0834605	-0.0785949	-0.0504126	0.023542	0.0739269	0.0741312
ILK_Signaling_Pathway_Opsonization	0.358938	0.26764	0.438187	-0.058571	0.0698998	-0.0113288	0.191854	0.348685	0.34586	0.364349	0.0341865	0.136941	0.190088	0.172975	0.299158	0.234628	0.133327
ILK_Signaling_Pathway_Tumor_Angiogenesis	-0.0247378	-0.0309195	-0.00275283	0.257793	0.0385503	-0.296343	-0.0386526	-0.0314945	-0.0598127	0.432065	-0.216539	-0.0186103	0.116392	0.192131	0.0681952	-0.0268958	0.0326713
Interferon_Pathway	0.0293692	-0.139678	0.0898558	-0.122175	0.0918788	0.0302961	-0.126047	0.0583194	-0.0979404	0.168426	-0.122654	-0.158837	-0.0916675	-0.0738411	-0.0755072	0.0177263	-0.128814
Interferon_Pathway_Gene_Expression_via_HIST1H3B_CREB3	0.413089	-0.160443	0.346364	0.180364	-0.0531889	-0.127176	0.0500879	0.435711	-0.0315434	0.353268	-0.244268	-0.467915	0.103662	-0.00355459	0.171037	0.331523	0.0546055
Interferon_Pathway_Transciption	-0.045568	-0.133306	0.0144215	0.0984032	0.151802	-0.250205	-0.123397	-0.044098	-0.119911	0.0237632	-0.167649	-0.57576	-0.0587695	-0.110403	-0.0182504	-0.0262588	-0.185127
Interferon_Pathway_Translation	0.247777	-0.155141	0.302891	-0.188887	-0.0855808	0.274468	-0.00818217	0.229046	0.0372837	0.515404	0.0688291	0.104815	0.0215828	0.00570311	-0.108269	0.0542511	0.0495098
IP3_Pathway	-0.011672	-0.0811593	0.0436492	-0.0448825	-0.0227916	0.0676741	-0.0106297	-0.0178996	0.0122486	0.0803701	-0.229456	-0.0866723	-0.0839836	-0.0484691	-0.0404838	0.00117384	-0.0275929
IP3_Pathway_Gene_Expression_via_CREB3_NFATC2_MEF2D	0.189412	0.0677424	0.167921	-0.0677773	0.0778652	-0.0100879	-0.0144738	0.132879	0.0910084	0.1854	-0.0740861	0.047433	0.0307939	0.0231543	0.10013	0.133315	0.11317
JAK-STAT_Pathway	-0.0318267	-0.0651093	0.0373086	-0.0625736	0.00323719	0.0593364	-0.0462029	-0.0244466	-0.0614646	0.0164987	-0.0955016	-0.0293578	-0.0706048	-0.019044	-0.0399425	-0.017812	-0.0640414
JAK-STAT_Pathway_Akt_Pathway	-0.0604756	0.0408157	0.0446417	-0.00680998	0.149158	-0.142348	0.0259579	-0.0554951	0.193568	-0.0301829	0.0324862	-0.249987	-0.075993	-0.064844	0.0291827	-0.0256876	-0.167257
JAK-STAT_Pathway_Gene_Expression_via_MYC	-0.338972	-0.319959	-0.338124	0.0167816	0.0978738	-0.114655	-0.221223	-0.210345	-0.349747	-0.375279	-0.512274	-0.656706	-0.246496	-0.0896564	-0.278079	-0.100055	-0.458549
JAK-STAT_Pathway_IFN-Inducible_Gene_Expression_via_STAT2_STAT1	-0.149271	-0.364381	-0.00280667	-0.513725	0.252084	0.261641	-0.44917	-0.0944827	-0.383749	0.0104298	-0.164144	-0.0906766	-0.369938	-0.110987	-0.250492	-0.134057	-0.361237
JAK-STAT_Pathway_JAK_Degradation	0.000884256	-0.133599	0.045093	-0.0294812	-0.0958415	0.125323	-0.00746199	0.00459442	-0.199667	-0.094441	-0.147099	0.0825728	-0.103894	0.00649164	-0.144209	-0.0211342	0.030985
JAK-STAT_Pathway_Nml_SOCS_BCL-XL_p21_Myc_Nos2_Gene_Expression_via_STAT2	-0.020815	-0.0793753	0.0318752	-0.0185645	-0.0383226	0.0568871	-0.0141314	-0.0219621	-0.0738468	0.0236375	-0.134363	-0.0406579	-0.0639582	-0.0250473	-0.0518621	-0.00636192	-0.0480728
JNK_Pathway	0.00233374	-0.0544356	0.0684314	-0.00328055	-0.0273361	0.0306167	-0.0177546	-0.00636302	-0.0331593	0.0782362	-0.0852058	-0.0157301	-0.0398143	-0.011694	-0.0214704	0.0109342	-0.0505047
JNK_Pathway_Gene_Expression_Apoptosis_Inflammation_Tumorigenesis_Cell_Migration_via_SMAD4_STAT4_HSF1_TP53_MAP2_DCX_ATF2_NFATC3_SPIRE1_MAP1B_TCF15_ELK1_BCL2_JUN_PXN_NFATC2	0.0441844	0.0290401	0.0814196	0.117215	-0.0365925	-0.0806228	0.0756943	0.040026	-0.0960507	0.115734	-0.0465495	-0.00828607	0.0694269	0.0750006	0.0625403	0.010038	0.0192422
JNK_Pathway_Insulin_Signaling	0.0221824	0.0781496	0.0614355	0.0336383	0.0692866	-0.102925	0.139759	0.140964	0.0685351	0.0589	0.0368227	0.141666	0.23452	0.222924	0.190214	-0.059244	0.186285
MAPK_Family_Pathway	0.0826486	-0.0685132	0.105657	0.0274359	-0.0197735	-0.00766243	-0.0199467	0.0765773	-0.0204558	0.167337	-0.134919	-0.100315	0.00725017	0.0129176	0.0184382	0.0682767	-0.0162608
MAPK_Family_Pathway_Chromatin_Remodelling	0.426708	-0.145767	0.316435	0.178332	0.0160405	-0.194372	0.0828369	0.460418	-0.0252041	0.411768	-0.233821	-0.432464	0.163327	0.0516954	0.252749	0.305846	0.0843429
MAPK_Family_Pathway_Cytoskeleton	0.00607992	-0.274557	0.0019603	-0.0280603	0.110867	-0.0828064	-0.196426	-0.000252395	-0.154143	0.0130625	-0.0746293	-0.167984	0.035924	0.0457016	-0.00898373	0.066168	-0.108875
MAPK_Family_Pathway_Gene_Expression_via_ATF2_JUN_ELK1_NFKB2_CREB3	0.20715	-0.163019	0.21707	0.0755424	-0.0992128	0.0236704	-0.0707995	0.177136	-0.0500702	0.201199	-0.0723057	-0.202039	-0.0136375	0.0660423	-0.0112133	0.139919	-0.0261417
MAPK_Family_Pathway_Translation	0.355041	-0.474911	0.231028	-0.00316416	0.0609015	-0.0577373	-0.373766	0.178524	-0.275255	0.320487	-0.230786	-0.262684	0.132171	0.153256	0.142152	0.132505	0.071065
MAPK_Signaling_Pathway	0.00846408	-0.0533839	0.0664162	-0.0250912	-0.00920288	0.0342941	-0.0177482	0.0108123	-0.0220776	0.0516755	-0.0788461	-0.0333327	-0.0239434	-0.015867	-0.0247458	0.026938	-0.041689
MAPK_Signaling_Pathway_Cell_Motility_Inflammation_Apoptosis_Osmoregulation	0.0780189	-0.272352	0.0771284	0.0201196	0.0546234	-0.074743	-0.203994	0.0162093	-0.148491	0.131785	-0.0799939	-0.27979	-0.0951779	-0.115081	-0.143661	-0.0592568	-0.0785792
MAPK_Signaling_Pathway_Cell_Survival	0.426668	-0.0697275	0.378377	-0.00706845	0.101214	-0.0941456	0.0241811	0.385679	0.0661594	0.559499	-0.134086	-0.275856	-0.0239355	-0.0444682	0.0472928	0.336332	-0.0106302
MAPK_Signaling_Pathway_Gene_Expression_Apoptosis_Inflammation_Tumorigenesis_via_MYC_HSF1_STAT2	-0.0230131	-0.141087	-0.0323882	0.0621734	0.041991	-0.104164	-0.061102	-0.0486067	-0.173386	0.00468312	-0.147414	-0.246278	0.0824164	0.0589107	0.0249341	-0.13153	-0.0149199
MAPK_Signaling_Pathway_Gene_Expression_Cell_Proliferation_Cell_Survival_Tumorigenesis_Differentiation_Development_via_PXN_CREB3_RPS6KA5_RPS6KA6	0.0036204	-0.146966	0.0602488	-0.0346916	-0.035418	0.0701096	-0.0145175	0.0133282	-0.0312194	0.103496	-0.0297777	-0.0294998	0.0266638	0.0483223	-0.0177005	-0.0188569	-0.041817
Mismatch_Repair_in_Eukaryotes_Pathway	-0.0476301	-0.0598333	-0.0335611	-0.0404285	0.0736421	-0.0332136	-0.0649094	-0.101623	0.121793	-0.0047547	0.115259	-0.208155	-0.00590593	-0.0336992	-0.0161722	-0.108904	-0.108485
Mitochondrial_Apoptosis_Pathway	-0.0504366	-0.0304286	-0.0847408	-0.112223	0.0681565	0.0440669	-0.0570354	-0.0745849	-0.0777622	-0.114756	-0.160888	0.013883	-0.0250846	-0.011133	0.0105914	-0.0534148	0.0543633
Mitochondrial_Apoptosis_Pathway_Apoptosis	-0.0212091	-0.0673232	-0.0673733	-0.0375473	-0.00875374	0.046301	-0.00790412	-0.0370828	0.00355078	0.0383921	-0.0772983	0.0158111	-0.0360485	-0.0271876	0.0340288	-0.037392	0.0383507
Mitochondrial_Apoptosis_Pathway_Depolarization	0.0706497	0.103726	0.0995513	0.0594093	-0.0171564	-0.0422529	0.170179	0.0882022	0.148236	-0.0247351	-0.0962323	0.288279	0.0897024	-0.0348875	0.0836662	0.0791327	0.189117
Mitochondrial_Apoptosis_Pathway_DNA_Fragmentation	-0.196493	-0.15024	-0.167079	-0.0472087	0.0523717	-0.00516293	-0.0669309	-0.211253	-0.0472408	-0.135607	0.0146616	-0.0912574	-0.183773	-0.123062	-0.0836327	-0.173998	-0.101796
Mitochondrial_Apoptosis_Pathway_Gene_Expression_via_TP53	0.11825	0.0902879	0.170406	0.0449289	-0.069543	0.0246141	0.178951	0.146927	0.179499	0.0267928	-0.131469	0.286306	0.0994622	-0.0434935	0.085346	0.175015	0.161379
mTOR_Pathway	0.036894	0.0242756	0.0830608	-0.00927371	0.0295711	-0.0202974	0.0132084	0.0356323	0.013762	0.0669825	-0.003704	0.0197855	0.0019711	0.016053	-7.1904e-06	0.055316	0.0019145
mTOR_Pathway_Actin_Organization	-0.0717449	0.0342196	-0.0276533	-0.0397652	0.00985244	0.0299127	0.027778	-0.0597364	0.0410282	-0.0792482	-0.0215893	0.0925106	-0.0120783	-0.0505356	-0.0279796	-0.0240578	-0.0718686
mTOR_Pathway_Autophagy	-0.0213762	-0.000634402	0.107737	-0.258542	0.0112443	0.247297	0.18811	-0.00168479	0.181383	-0.0395716	0.259627	0.362858	0.137494	0.0312327	-0.0835086	0.0180342	0.0119631
mTOR_Pathway_Cap-dependent_Translation	0.271924	0.185469	0.454064	-0.408287	0.0534541	0.354832	0.062144	0.292337	0.2351	0.48584	0.144228	0.388611	0.0573708	0.0891865	0.0242123	0.15454	0.11991
mTOR_Pathway_Inflammation_Stress_Resistance	0.259578	-0.0220376	0.228049	0.189884	-0.100237	-0.0896468	-0.0182777	0.220366	-0.0383435	0.224064	0.0154122	-0.177518	0.0256077	0.209035	0.060094	0.216989	-0.0226932
mTOR_Pathway_Lipid_Synthesis	-0.0853732	-0.0069056	-0.0233613	-0.0505547	0.0241654	0.0263893	0.0215147	-0.049715	0.0215302	-0.122377	-0.0693223	0.0524108	-0.0312228	-0.0571615	-0.0532291	-0.00300332	-0.0872392
mTOR_Pathway_Metabolism_Stress_Response_and_Apoptosis	0.28105	0.266422	0.30952	-0.173756	-0.104822	0.278578	0.303077	0.119606	0.354802	0.32189	0.423533	0.403559	0.335125	0.0281649	0.220884	0.126455	0.178862
mTOR_Pathway_Microtubule_Organization	-0.0994608	-0.0103708	-0.0358616	-0.0564958	0.0219512	0.0345446	0.0165479	-0.0655548	0.0212188	-0.122941	-0.0708344	0.0560211	-0.046699	-0.0691381	-0.0662703	-0.0215361	-0.0948738
mTOR_Pathway_Mitochondria_Proliferation_and_Function	0.0800149	-0.00196157	0.271808	-0.248763	-0.0415518	0.290315	0.142082	0.0996912	0.285416	0.0616493	0.412206	0.372326	0.0142023	-0.123423	-0.140681	0.119772	-0.0709206
mTOR_Pathway_mRNA_Biogenesis	-0.228267	0.0831837	0.0357567	-0.189171	-0.150907	0.340078	0.42839	-0.201299	0.445138	-0.050031	0.619679	0.52045	0.104698	-0.00976183	-0.260354	-0.275665	-0.117378
mTOR_Pathway_Ribosome_Biogenesis	-0.0555233	-0.174167	-0.0147399	-0.0807861	-0.181818	0.262604	0.221252	0.0580261	0.18191	0.523444	0.366763	0.198101	0.0375085	-0.140772	-0.296588	-0.151896	-0.029098
mTOR_Pathway_Translation_Elongation	0.0173388	0.39427	0.106447	-0.103092	0.0967496	0.00634275	0.164395	-0.0113005	0.22222	0.0380976	0.191349	0.316119	0.190527	0.114186	0.0716091	0.0138261	0.195863
mTOR_Pathway_VEGF_Pathway	0.27779	0.193132	0.659756	-0.333918	0.121691	0.212226	0.50827	0.345841	0.347987	0.425014	-0.0307789	0.661473	0.461825	0.411159	0.227172	0.446874	0.315299
NGF_Pathway	0.0548839	0.0215408	0.125322	0.0826279	0.0317447	-0.114373	0.0226631	0.0487613	0.0927661	0.122415	0.089553	-0.05077	0.0661353	0.0308435	0.077603	0.0215532	0.0238361
NGF_Pathway_Actin_Polymerization_Neurite_Outgrowth_and_Differentiation	0.273593	0.188058	0.162615	0.0642791	0.00747788	-0.0717569	0.096475	0.155387	0.0861767	0.228975	0.0770015	0.0325371	0.260055	0.246926	0.281128	0.127416	0.191372
NGF_Pathway_Apoptosis	-0.019246	-0.0062529	0.152717	0.0753131	0.155574	-0.230887	-0.00608756	-0.0097681	0.0548296	-0.0200432	-0.0276842	0.0136448	0.11114	0.0122353	0.0878169	-0.0619017	0.139434
NGF_Pathway_Gene_Expression_via_MYC_ELK1_CREB3_NFKB2	0.171655	-0.125304	0.0933754	0.168917	-0.00143621	-0.167481	-0.0370166	0.150593	-0.0923956	0.137969	-0.129289	-0.198723	0.126253	0.0781015	0.132029	0.15651	0.0304364
NGF_Pathway_Neurite_Outgrowth_and_Differentiation	-0.124137	-0.0341106	-0.00149907	0.0426635	0.12944	-0.172104	-0.0328928	-0.119161	0.161346	-0.0226936	0.1181	-0.19043	-0.0563896	-0.118867	-0.00152654	-0.119229	-0.221776
NGF_Pathway_Neuronal_Survival	-0.102414	0.0182071	0.0226281	0.0417807	0.168073	-0.209854	-0.0339983	-0.116844	0.180643	0.00824383	0.145225	-0.135297	-0.039633	-0.118043	0.0323251	-0.0789866	-0.198117
Notch_Signaling_Pathway	0.0746914	0.0430474	0.0984442	0.191906	-0.188552	-0.00335383	0.0935607	0.0823648	-0.0467059	0.12507	0.185563	0.0569681	0.0496649	0.0121954	0.0273688	0.0888264	-0.268504
Notch_Signaling_Pathway_gamma_Secretase	0.000210014	0.165904	0.010655	0.028357	-0.130444	0.102087	0.18209	0.0400934	0.175156	-0.0838166	0.180584	0.409896	0.278805	0.32652	0.352494	-0.171612	0.0346086
Notch_Signaling_Pathway_Gene_Expression_Chromatin_Remodeling_via_RBPJ	0.0912428	0.0157459	0.117953	0.22825	-0.201465	-0.0267852	0.0738877	0.0917585	-0.0960085	0.171489	0.18667	-0.0214603	-0.00125506	-0.0576546	-0.0448813	0.146702	-0.335863
p38_Signaling_Pathway	0.0136442	-0.0755327	0.0698687	-0.00395303	-0.0182021	0.0221552	-0.045324	0.0209974	-0.0485888	0.0662117	-0.117146	-0.0234642	-0.0154638	-0.00191815	-0.0162099	0.0273477	-0.0357004
p38_Signaling_Pathway_Actin_Cytoskeleton_Reorganiztion	0.186968	0.00865447	0.188126	-0.102244	0.141932	-0.0396887	0.0549618	0.176114	0.049624	0.241749	-0.137703	0.0722212	0.286462	0.275101	0.249727	0.193307	0.152314
p38_Signaling_Pathway_Gene_Expression_Cell_Motility_Inflammation_Apoptosis_Osmoregulation_via_MEF2D_TP53_CREB1_ATF2_JUND_ETV1_NFKB2_AP2A1_MAX_FOSL1_CEBPG_ELK1_CDC25C_JUNB_STAT1_SP1_DDIT3_ELK4_CEBPA	0.194764	-0.181105	0.169577	0.093304	0.0193975	-0.112702	-0.0921933	0.173249	-0.10282	0.223714	-0.176316	-0.295261	0.0119219	0.0641564	0.047539	0.178311	-0.00867039
p38_Signaling_Pathway_Translation	0.448172	-0.165901	0.129382	0.271759	0.211288	-0.483046	-0.0999529	0.25147	-0.0306307	0.35156	-0.17962	-0.347296	0.422702	0.30319	0.54181	0.0923395	0.271457
p53_Signaling_Pathway	0.0292874	0.0056085	0.0526481	-0.0111393	-0.00165239	0.0127917	-0.00680346	0.0375949	0.0613407	0.0952514	-0.0317193	0.0642476	-0.0593795	-0.0287174	0.00118231	0.0244261	-0.0289177
p53_Signaling_Pathway_Apoptosis	0.0429866	0.0119991	0.0880335	-0.0216051	0.0106722	0.010933	0.0435752	0.0466048	0.0793966	0.0709179	-0.0291058	0.138339	0.000486289	-0.00256601	0.0218075	0.0380731	0.042066
p53_Signaling_Pathway_Breast_Cancer	-0.0264299	-0.00162258	0.0276738	-0.0372047	0.0292971	0.00790754	0.00390729	-0.0267037	0.0486544	-0.000516437	-0.00394098	0.141717	-0.029199	-0.0423016	-0.0142672	-0.013231	0.00729759
p53_Signaling_Pathway_Inhibition_of_IGF1R_mTOR_Pathways	-0.224458	-0.0445176	0.142217	0.0938794	0.399685	-0.493564	-0.0549072	-0.240185	0.203656	0.173333	0.30499	0.221878	-0.473564	-0.180402	-0.438859	-0.018269	0.0893744
PAK_Pathway	0.0164568	-0.0507237	0.0646199	-0.0292606	-0.00571732	0.0349779	-0.044186	0.0190617	-0.0161463	0.0663091	-0.0959235	-0.00850406	0.00621683	0.00976824	0.0163655	0.0403337	-0.0478284
PAK_Pathway_Actin_Organization	0.0417256	-0.0128889	0.0918781	-0.0494171	-0.0263867	0.0758038	-0.0274698	0.0402056	-0.0125188	0.0885408	-0.102624	0.030769	0.0087841	0.0222628	0.0116	0.0636944	-0.0277327
PAK_Pathway_Contractility_Stress_Fibres_and_Focal_Adhesion	-0.0673406	-0.209422	0.0272285	-0.0142466	0.0973681	-0.0831215	-0.141382	-0.0508975	-0.00101042	-0.0169995	0.0664283	-0.114504	-0.0457254	-0.0290377	0.0115792	0.00879016	-0.162267
PAK_Pathway_Lamelliopodia_and_Filopodia_Outgrowth	0.0604903	-0.00874645	0.0955556	-0.0505115	-0.0290908	0.0796023	-0.0191483	0.0509815	-0.0130512	0.110297	-0.114099	0.0352888	0.0257894	0.0349459	0.0256204	0.076013	-0.0163489
PAK_Pathway_Paxillin_Disassembly	-0.538123	0.333895	-0.152541	0.213247	-0.220802	0.00755465	-0.0590409	-0.606152	0.0315857	-0.39563	0.262808	0.549465	-0.113462	-0.182302	-0.268403	-0.540672	-0.0774084
PAK_Pathway_Transciptional_Activation_and_Filopodia_Formation	-0.0842449	-0.144751	-0.0353588	0.0475583	0.152774	-0.200332	-0.0518068	-0.0608233	-0.110065	0.137334	-0.247832	-0.187799	0.0092536	0.0451253	0.0351539	-0.23407	-0.0239735
PPAR_Pathway	-0.00482668	-0.0322308	0.0170783	-0.105399	0.00186929	0.10353	0.0194403	-0.00280101	0.0348439	0.0297062	-0.0311664	-0.00516688	-0.0426961	-0.0036986	-0.0136396	-0.0146085	-0.0517017
PPAR_Pathway_Adipocyte_Differentiation_Glucose_Homeostasis_and_Macrophage_Function	0.451395	0.0418642	0.532534	0.0106862	0.0260874	-0.0367736	0.0677277	0.385121	0.139419	0.315463	-0.0290476	0.0725927	0.0815892	0.112989	0.121237	0.530857	0.109074
PTEN_Pathway	-0.0210374	0.0471906	-0.0437571	-0.0104645	-0.0261259	0.0365904	0.0122152	-0.038899	0.0247374	-0.0334551	0.0114796	0.0149605	-0.0204656	-0.0192318	-0.01856	-0.038186	0.0107652
PTEN_Pathway_Adhesion_or_Migration	-0.00998647	0.031334	-0.042307	0.00795708	-0.0261915	0.0182344	-7.29254e-05	-0.0294373	0.00831286	-0.0314936	0.0130661	-0.0166937	0.0012246	1.36726e-05	0.00051486	-0.0434744	0.02765
PTEN_Pathway_Angiogenesis_and_Tumorigenesis	-0.0428682	-0.0370495	-0.0354707	-0.0463013	-0.047352	0.0936533	-0.0632079	-0.0638121	-0.0645454	-0.0530938	-0.109866	-0.0628106	-0.0890771	-0.070624	-0.0894575	-0.0473049	-0.0365595
PTEN_Pathway_Apoptosis	-0.306294	-0.0454639	-0.222317	-0.14263	-0.0516756	0.194306	-0.161011	-0.320125	0.0905964	-0.307907	0.320996	0.323995	-0.27065	-0.203888	-0.329445	-0.284931	-0.0930763
PTEN_Pathway_Cell_Cycle	0.0284133	-0.0583402	0.00282741	0.0955555	-0.11598	0.0204246	-0.042324	-0.00977912	-0.0391961	-0.032835	-0.0597501	-0.102487	-0.0130574	-0.0176152	-0.0423204	0.0243873	-0.0218255
PTEN_Pathway_Cell_Survival	-0.10377	0.023373	-0.0956165	0.0347647	-0.08944	0.0546753	-0.139724	-0.124153	0.00139899	-0.0076769	-0.0056562	-0.074088	-0.196905	-0.0412542	-0.10126	-0.11583	0.0195183
PTEN_Pathway_Differentiation	0.0224407	-0.058811	-3.26212e-06	0.0882164	-0.116104	0.0278872	-0.0450899	-0.0131498	-0.0381309	-0.03904	-0.0553436	-0.0966289	-0.0213287	-0.0220119	-0.0499546	0.0146262	-0.0249083
PTEN_Pathway_DNA_Repair	0.0203614	-0.0393144	-0.0249448	0.0741654	-0.11103	0.0368648	-0.0341691	-0.025928	-0.062039	-0.0688153	-0.063925	-0.0790291	-0.0330518	-0.0125727	-0.0542261	0.0070799	0.0120567
PTEN_Pathway_Genomic_Stability	0.00937512	-0.0317879	-0.0412502	0.0764195	-0.117276	0.0408569	-0.03112	-0.0383011	-0.0528955	-0.080081	-0.0541034	-0.0602886	-0.033427	-0.0157805	-0.0574232	-0.00019692	0.0118494
PTEN_Pathway_Migration	-0.0107425	0.0639919	-0.0435711	0.0615649	-0.0827187	0.0211538	0.0511338	-0.0225142	0.00697959	-0.0857665	0.0140849	-0.00560256	0.00724699	-0.00508521	-0.00536962	-0.0141435	0.0377774
PTEN_Pathway_Neuronal_Survival	-0.317653	-0.185291	-0.355159	-0.296614	0.0386577	0.257956	0.0443324	-0.295641	-0.0173756	-0.0667896	0.202331	0.160388	-0.412101	-0.0754097	-0.327872	-0.271945	-0.372314
PTEN_Pathway_Proliferation	-0.00107295	0.0866153	-0.0482542	0.0763586	-0.0893333	0.0129747	0.0580316	-0.0167396	0.00593988	-0.082744	0.0177831	0.00304837	0.0205722	0.0203187	0.0118224	-0.0112017	0.0502027
PTEN_Pathway_Proliferation_CyclinA2_Geminin_AuroraA_PLK1	-0.0550994	0.257655	-0.0275936	-0.134673	-0.112219	0.246891	0.22062	-0.104269	0.23116	0.0186301	-0.0395868	0.329838	-0.139919	-0.109793	-0.115522	0.0122171	0.0725724
PTEN_Pathway_Protein_Synthesis	0.3424	-0.124776	-0.0536351	0.283757	0.22636	-0.510117	-0.642585	0.301948	-0.667707	0.0750465	-0.929518	-0.780675	-0.157047	0.0146427	0.390531	0.413498	0.176066
PTEN_Pathway_Synaptic_Transmission	0.0101368	-0.0400071	-0.0528252	0.0908961	-0.12483	0.0339335	-0.0386616	-0.0414298	-0.0623484	-0.0878458	-0.0636105	-0.0728854	-0.0325356	-0.0169894	-0.0557485	3.25134e-05	0.0068748
RANK_Signaling_in_Osteoclasts_Pathway	0.197295	0.0272155	0.220612	0.102208	0.0548478	-0.157056	0.006063	0.162993	0.067568	0.204358	-0.0107627	-0.0775634	0.0478571	0.0671785	0.0721169	0.177681	0.0303062
RANK_Signaling_in_Osteoclasts_Pathway_Expression_of_Osteoclastic_Genes_via_JUN_NFAT5_NFKB2_MITF_FOS	0.263291	-0.18815	0.233971	0.0744324	0.0472514	-0.121684	-0.140936	0.193985	-0.134034	0.228557	-0.197649	-0.322365	-0.00194905	0.0562917	0.0381732	0.253106	-0.0299251
RANK_Signaling_in_Osteoclasts_Pathway_Inhibition_of_Death	0.150757	0.170636	0.204297	0.199452	0.129715	-0.329167	0.154634	0.113936	0.258926	0.141301	0.236674	0.0137604	0.177429	0.186482	0.171818	0.149257	0.107821
RANK_Signaling_in_Osteoclasts_Pathway_Resorption	0.21998	0.0155999	0.187728	0.0613272	0.00525427	-0.0665815	0.0215102	0.148665	0.0998508	0.159673	-0.0286885	-0.164861	0.034252	0.0690907	0.0869325	0.193788	-0.0255922
Ras_Pathway	0.00701428	-0.10143	0.0552854	-0.0133955	0.0012262	0.0121693	-0.0673435	0.0151011	-0.0490158	0.0484657	-0.111685	-0.0864112	-0.0419724	-0.0475924	-0.0416668	0.044506	-0.0634478
Ras_Pathway_Apoptosis	0.110286	-0.0272549	0.170016	0.0719115	0.0741086	-0.14602	-0.0428795	0.115601	0.08494	0.09902	0.0243208	-0.193939	-0.0220263	0.00899846	0.0828298	0.126195	-0.0954591
Ras_Pathway_CDC42_Pathway	0.24162	0.37537	0.441718	0.0192461	0.171601	-0.190847	0.217679	0.298177	0.412617	0.493609	0.462083	0.16653	0.126091	0.0906562	0.201533	0.285283	0.178149
Ras_Pathway_Cell-Cell_Junctions	-0.1002	0.0277737	-0.0399625	0.0874335	-0.0574047	-0.0300289	0.0331515	-0.0126685	0.0610475	-0.0294144	0.0145382	-0.011489	-0.0687631	-0.0253143	0.00744924	0.0475523	-0.0301269
Ras_Pathway_Gene_Expression_Cell_Proliferation_Cell_Survival_Differentiation_Development_Cell_Cycle_Control_Cell_Motility_Tumorigenesis_via_ELK4_ATF2_MEF2D_STAT2_CREB3_CCNA1_MYC_ELK1_JUN_CDK4	0.0730368	-0.101561	0.0246109	0.00950499	0.0212738	-0.0307788	-0.059585	0.0147992	-0.0949504	0.138791	-0.192955	-0.151113	-0.0573228	-0.0931102	-0.0129359	0.082657	0.000952947
Ras_Pathway_Golgi_Trafficking_and_Vesicle_Formation	-0.0398562	0.196309	0.0394599	-0.0884696	0.0521274	0.0363422	-0.0380663	-0.0954059	0.14425	-0.00691616	0.365253	0.177985	0.0692739	-0.0249028	-0.0559992	0.000700396	-0.0932781
Ras_Pathway_Increased_T-cell_Adhesion	-0.199914	-0.238853	-0.114852	-0.260651	0.0243992	0.236252	-0.13226	-0.140739	-0.139201	-0.0598155	-0.186085	-0.0456242	0.0167629	-0.0229854	-0.0384016	-0.16599	-0.0968405
Ras_Pathway_Receptor_Endocytosis	0.245957	0.180569	0.432615	0.00977981	-0.0468487	0.0370689	0.0646107	0.337899	0.116418	0.358418	0.208724	0.314358	0.211862	0.130444	0.31144	0.264361	0.148654
Ras_Pathway_RhoA_Pathway	0.0828067	0.278351	0.159452	0.100703	0.167634	-0.268337	0.188113	0.18856	0.21085	0.18159	0.347127	0.133467	0.135335	0.0984424	0.155616	0.151613	-0.00418002
SMAD_Signaling_Network_Pathway	0.0995416	-0.0271286	0.0614971	-0.0825707	-0.0344215	0.116992	-0.0233553	0.0469575	0.0179202	0.046876	-0.113796	0.0168529	0.013018	0.0268668	-0.00334443	0.0585192	0.0681808
STAT3_Pathway	0.0369399	-0.0145341	0.0876113	-0.00893911	-0.0606783	0.0696174	-0.00555069	0.0461308	-0.0292395	0.0881868	-0.0745207	0.051425	0.0308167	0.040377	0.0219216	0.0281333	-0.000516147
STAT3_Pathway_Anti-Apoptosis	-0.511195	-0.136085	-0.31636	0.186661	-0.148994	-0.0376664	-0.198951	-0.291126	-0.17432	-0.112961	0.0197502	-0.397926	-0.0971426	-0.220779	0.119083	-0.79977	-0.323859
STAT3_Pathway_G1_to_S_Cell_Cycle_Progression	-0.0322553	0.272921	-0.188454	0.0126359	-0.117128	0.104492	0.0316515	-0.118623	-0.103931	-0.205479	-0.044553	-0.0985171	-0.13872	-0.123462	-0.210379	0.284472	-0.491056
STAT3_Pathway_Growth_Arrest_and_Differentiation	0.0770163	-0.0497973	0.131993	0.0192587	-0.0523284	0.0330697	-0.0166474	0.0912942	-0.0997126	0.115453	-0.0915852	0.0302179	0.0169108	0.016894	0.0133395	0.0510359	-0.0222258
Target_drugs_pathway	-0.0310971	-0.00266466	0.0101773	-0.0141466	-0.0157547	0.0299013	-0.0212116	-0.0291899	-0.0375683	0.0358896	-0.0344478	0.0283038	-0.0125556	-0.00627219	0.0128555	-0.0484676	-0.0126746
TGF-Beta_Pathway	0.0306007	-0.00353657	0.0591975	-0.0122323	-0.0157122	0.0279446	0.013535	0.010592	-0.0132852	0.0740753	-0.104132	-0.0147932	0.0221998	0.0363211	0.0342559	0.0302968	-0.00426273
TGF-Beta_Pathway_Epithelial_Mesenchymal_Transdifferentiation	-0.15662	0.149288	-0.0132392	-0.0224659	0.188245	-0.165779	0.0650901	-0.154693	0.296259	-0.143025	0.221244	-0.110772	-0.0706545	-0.110612	0.000277712	-0.11839	-0.137099
TGF-Beta_Pathway_Post_Transciptional_G1_Arrest	0.090334	0.368528	0.0827217	-0.18396	0.00368082	0.180279	0.170218	0.108677	0.228907	-0.0960961	0.0816001	0.361725	0.276058	0.235726	0.199773	0.174165	0.041876
TGF-Beta_Pathway_Transciption_Arrested_Growth_Apoptosis	-0.12465	-0.145221	-0.146151	0.0186199	0.0893799	-0.108	-0.244119	-0.210466	-0.141569	-0.148125	-0.0829834	-0.223927	-0.0483902	-0.129334	-0.0676583	-0.237888	-0.094138
TNF_Signaling_Pathway	0.196781	0.0162619	0.165287	0.0360236	-0.0252138	-0.0108098	0.0244512	0.165052	0.0501763	0.198439	-0.0357167	0.0463939	0.006287	0.0472526	0.0729347	0.129261	0.049776
TNF_Signaling_Pathway_Apoptosis	0.382618	0.295716	0.317222	-0.00276822	-0.09759	0.100358	0.290454	0.341078	0.299234	0.389288	-0.0213553	0.409697	0.13145	0.192191	0.254969	0.274686	0.256218
TNF_Signaling_Pathway_Gene_Expression_and_Cell_Survival_via_FOS_NFKB2_JUN_ELK1_ATF6	0.0465802	-0.208154	0.022302	-0.0212733	0.0073068	0.0139665	-0.184552	0.020694	-0.0979363	0.0519989	-0.0919122	-0.231837	-0.176785	-0.115699	-0.107618	0.017692	-0.156394
TRAF_Pathway	0.0787353	0.0387791	0.187002	0.109796	0.0550302	-0.164826	0.0374311	0.112092	0.0541645	0.161532	0.115903	0.054688	-0.0182871	0.00542123	0.00430916	0.0694444	-0.0584633
TRAF_Pathway_Apoptosis	0.386595	0.441571	0.359045	0.173491	-0.036468	-0.137023	0.383498	0.367789	0.322843	0.408948	0.1436	0.526521	0.437002	0.338795	0.421344	0.255948	0.408079
TRAF_Pathway_Cell_Survival	-0.149738	0.0982892	-0.00238599	0.0162341	0.242585	-0.258819	0.0655327	-0.156397	0.199725	-0.144141	0.240419	-0.128705	-0.0637149	-0.0540883	0.0102363	-0.109508	-0.136969
TRAF_Pathway_Direct_Antimicrobial_Response_and_Cell-Mediated_Immunity_and_Apoptosis_of_Host_Cell	0.315204	0.0196143	0.251335	0.187728	-0.108772	-0.0789559	0.057394	0.227467	-0.0121052	0.269786	0.00322706	-0.144137	0.118622	0.299065	0.135703	0.259598	0.0856596
TRAF_Pathway_Gene_Expression_via_FOS_JUN	0.0818071	-0.291066	0.0728839	0.0584024	0.127255	-0.185657	-0.251871	0.0709324	-0.180404	0.166582	-0.153975	-0.430123	-0.0615505	-0.0315708	-0.0228492	-0.0499308	-0.134305
Triplneg_2_Main_Pathway	-0.0413392	-0.00733347	0.0304922	-0.00329552	0.00905766	-0.00576214	-0.0355983	-0.00230684	-0.00470836	0.0021942	0.0369161	0.00756694	-0.026056	-0.0402814	-0.0156049	-0.0626712	-0.027169
Triplneg_3_Main_Pathway	-0.0813448	-0.0144304	0.0600007	-0.00648474	0.0178231	-0.0113384	-0.0700483	-0.00453927	-0.00926484	0.00431763	0.0726414	0.0148898	-0.0512715	-0.0792635	-0.0307064	-0.123321	-0.0534616
Triplneg_Main_Pathway	-0.0803836	0.107315	-0.0014958	0.0116872	-0.0374904	0.0258032	0.0054651	0.00645653	0.0787012	-0.0159449	0.136168	0.0974358	-0.0122361	-0.0464825	0.0224696	-0.124505	-0.0949759
Ubiquitin-Proteasome_Dependent_Proteolysis_Pathway	-0.00573475	0.191487	0.0876883	0.168322	0.00455386	-0.172876	0.119402	0.0257005	-0.0416302	0.0739565	0.254749	0.188207	0.150271	0.0315106	0.150613	-0.0463823	0.0399392
VEGF_Pathway	0.0931261	-0.0563449	0.12587	0.122868	-0.00807893	-0.114789	-0.011036	0.0651796	0.0509394	0.161955	0.0455752	-0.109093	0.145268	0.0723362	0.139056	0.0680159	-0.0126424
VEGF_Pathway_Actin_Reorganization	0.545079	0.153544	0.271595	-0.144458	-0.0439748	0.188432	0.209041	0.331462	0.0944582	0.598801	-0.306674	0.254321	0.351979	0.275936	0.325952	0.37974	0.24648
VEGF_Pathway_Cell_Survival	-0.199609	0.139148	-0.040779	-0.0210518	0.210874	-0.189823	0.048198	-0.194802	0.246238	-0.219116	0.26043	-0.156609	-0.0990509	-0.131843	-0.0438362	-0.139526	-0.164918
VEGF_Pathway_Focal_Adhesion_Turnover	0.111956	0.269209	0.178285	0.244507	-0.17124	-0.0732672	0.320632	0.0701068	0.2441	0.12878	0.234086	0.301956	0.284861	0.230016	0.313739	-0.0270948	0.138795
VEGF_Pathway_Gene_Expression_and_Cell_Proliferation_via_MAPK7	0.208465	-0.257766	0.119876	0.235192	0.100607	-0.335799	-0.150304	0.166206	-0.129297	0.310177	-0.0428381	-0.400465	0.254641	0.120719	0.275295	0.135204	0.040076
VEGF_Pathway_Nitric_Oxide_Production	0.151118	-0.43874	-0.13053	0.12167	-0.0927805	-0.02889	-0.402197	-0.0636806	-0.146482	0.248819	-0.189153	-0.344385	0.34042	0.140542	0.244674	-0.171234	0.322209
VEGF_Pathway_Prostaglandin_Production	0.113531	-0.184165	0.11273	0.198296	0.0205288	-0.218825	-0.0859131	0.0776458	-0.057836	0.330715	-0.0211943	-0.0741102	0.184842	0.0772152	0.175215	0.0822944	-0.0214778
WNT_Pathway	-0.0210562	-0.0779241	0.0423502	0.0136546	9.96154e-05	-0.0137542	-0.050315	-0.0148712	-0.0544237	0.0290941	-0.102837	-0.0400032	-0.0784651	-0.0290879	-0.0707481	-0.00254688	-0.0364063
WNT_Pathway_Cell_Fate_Proliferation_Differentiation_Adhesion_and_Survival	0.00339495	-0.0696771	0.081352	0.0287176	-0.076854	0.0481363	0.00801791	0.00190484	-0.138878	0.0242928	0.00978201	0.0516958	-0.0979777	-0.0198349	-0.118079	-0.00760267	-0.0411328
WNT_Pathway_Cell_Survival	-0.117855	-0.225592	-0.0590044	0.0112207	0.101411	-0.112632	-0.18299	-0.0426009	-0.0817825	0.0456971	-0.210243	-0.245625	-0.268338	-0.1278	-0.128956	-0.0863592	-0.222214
WNT_Pathway_Cytoskeletal_Rearrangement	0.200176	-0.348149	0.399283	0.0763942	-0.038355	-0.0380391	-0.524227	0.34956	-0.543906	0.393972	-0.738538	-0.49914	-0.440913	-0.29691	-0.227702	-0.00642123	-0.519209
WNT_Pathway_Gene_Expression_via_CREB3	-0.0423167	-0.30409	-0.00901786	-0.0192018	0.00817866	0.0110231	-0.236097	-0.0785075	-0.154605	0.0147641	-0.318512	-0.205387	-0.0623797	-0.0428977	-0.0814923	-0.0861607	-0.0538495
WNT_Pathway_NFAT_Pathway	-0.175534	-0.0972396	-0.0517877	0.0200948	0.114603	-0.134698	-0.0649592	-0.140267	0.0019186	-0.136552	-0.19888	-0.192199	0.0705663	0.0115494	0.08461	-0.0794546	-0.0865053
WNT_Pathway_PKC_Pathway	-0.0710457	-0.340574	0.0101446	0.0293464	-0.00565767	-0.0236888	-0.224809	-0.0868252	-0.121864	0.0201457	-0.278471	-0.331232	-0.0977039	-0.0790852	-0.124652	-0.0755451	-0.152203

## Sheet: cnr.gse37307
Gene name	GSM915755	GSM915756	GSM915757	GSM915758	GSM915759	GSM915760	GSM915761	GSM915762	GSM915763	GSM915764	GSM915765	GSM915766	GSM915767	GSM915768	GSM915769	GSM915770	GSM915771	GSM915772	GSM915773	GSM915774	GSM915775	GSM915776	GSM915777	GSM915778	GSM915779	GSM915780	GSM915781	GSM915782	GSM915783	GSM915784	GSM915785	GSM915786	GSM915787	GSM915788	GSM915789	GSM915790	GSM915791	GSM915792	GSM915793	GSM915794	GSM915795	GSM915796	GSM915797	GSM915798	GSM915799	GSM915800	GSM915801
AATK	0.902625	1.15725	0.886434	0.397661	0.805558	1.04511	0.763891	1.33472	0.894778	0.986713	1.06817	1.15377	1.0228	1.14896	1.37181	0.900376	1.15938	0.334	1.32534	0.39912	0.612315	1.17971	0.861226	0.808818	0.398168	0.699615	1.34452	0.578973	1.33628	0.96668	0.396009	1.21452	0.866504	1.24684	1.17416	0.948229	1.11753	1.30601	0.981694	1.04149	0.475196	1.02091	0.882834	0.526192	1.08172	0.790432	0.180117
ABI1	0.198057	0.296998	0.428777	0.323369	0.321616	0.326779	0.196029	0.246966	1.59017	1.11476	1.86678	2.47658	1.29732	1.59682	1.41585	1.72367	1.57945	0.445126	0.380036	0.514232	0.438414	0.62056	0.252364	0.402081	0.453626	0.715201	0.693737	0.47844	0.533861	0.493835	0.280585	0.922598	1.57175	0.62256	0.396637	0.585135	0.356225	1.81795	1.45473	1.39756	0.882448	0.409634	0.756142	1.1095	0.601785	1.15972	0.402081
ABL1	0.792738	0.699089	0.713434	0.597668	0.695611	0.680415	0.645527	0.629579	1.14951	1.26175	1.59756	1.27183	1.23528	1.33724	1.11519	1.15406	1.42352	1.22392	0.970225	0.901466	0.96269	0.969727	0.779091	0.664435	0.71854	0.781452	0.958041	0.742632	0.66594	0.673528	1.37847	1.13447	1.40141	0.946316	0.783451	1.03952	0.865793	1.33724	1.14951	1.15726	1.27183	0.836628	0.828798	1.41267	1.1162	0.874905	1.15223
ACAN	1.02319	1.02681	1.12265	0.900103	0.789362	0.877344	1.16489	0.697474	0.989088	0.912136	1.41255	1.24689	0.903051	1.0703	1.00824	1.00198	0.853934	1.07662	1.07228	0.928892	0.9245	1.03708	1.13103	0.732748	0.789847	1.28686	0.979063	1.11822	0.890042	1.46995	1.00698	1.24273	1.22699	0.883268	0.905536	0.958838	1.25553	1.2684	0.871589	1.50394	1.04111	0.990258	0.98589	1.08827	1.38544	1.03054	0.979063
ACTA1	1.32736	0.747803	0.998815	2.05477	1.42773	1.57239	1.24767	1.54156	0.632156	0.578502	0.436315	1.28251	0.431868	0.742965	0.356364	0.982975	0.638238	0.686131	1.53096	4.25118	0.217475	0.999619	1.00182	0.596204	0.614209	0.748627	1.06683	1.01792	1.30393	2.66047	1.00224	1.00296	1.20175	0.865411	1.11147	1.81252	0.913523	1.8149	1.06683	0.885895	0.748795	1.25077	0.829637	0.5336	1.27936	0.587543	1.06254
ACTA2	0.8389	2.07352	0.756579	1.4478	1.9664	1.07316	0.410605	1.91357	0.728878	0.819941	0.629535	0.585446	0.821179	0.833755	0.735	0.789312	0.576416	0.982678	1.95388	1.95117	1.0768	1.75133	1.65767	1.73735	1.21945	1.14527	1.55021	0.664959	0.512375	1.2681	1.06481	1.33098	1.04281	2.46283	1.12803	0.892473	0.679074	0.882174	1.0881	0.952297	1.00154	1.20521	1.51445	1.15618	1.36073	1.74011	1.05724
ACTB	1.108	0.907582	0.894631	0.80143	1.00203	0.734704	0.904975	0.861237	1.15881	1.21908	0.978228	1.17105	1.05858	1.04272	1.40373	0.896789	0.856416	1.16732	0.965689	1.42909	1.36084	1.2764	1.24041	1.1927	1.03773	1.58615	1.00145	0.628726	0.986348	1.44084	0.997247	1.20837	1.38941	1.14005	1.04302	0.801007	1.25837	1.05279	1.13099	1.0837	1.13827	1.29914	0.910216	1.27275	1.11492	1.15267	1.1744
ACTC1	0.960108	0.816153	1.78451	1.07847	0.77115	0.874551	1.01925	0.919404	1.00907	0.900851	0.626722	1.26813	0.761428	1.21341	0.873789	1.36999	0.753003	1.13664	0.998671	0.84091	1.3827	0.899149	1.49482	0.810376	0.948643	1.03884	1.03288	0.921297	0.952617	0.782287	0.788209	1.29812	1.4925	1.04547	1.03668	1.41171	1.39233	1.61846	1.24719	1.72814	1.031	0.974309	1.12979	0.672759	1.65445	0.703762	1.09154
ACTG2	0.990947	0.813919	0.630829	0.909034	0.778996	0.920191	0.815266	0.718468	1.0492	1.20084	1.16335	1.27109	1.33967	1.22081	1.01202	1.01962	1.14574	1.10109	0.966883	0.699852	2.08976	0.924554	0.631778	2.21579	1.97822	0.918528	0.606737	1.19891	1.40093	1.02705	1.14204	0.508352	0.498415	0.656658	0.858992	0.843568	0.657249	0.588028	0.845996	1.107	1.29425	1.00123	0.781489	1.21199	0.771958	0.865253	1.02963
ACTN1	0.751814	0.728584	0.934842	0.95125	0.724008	0.834392	0.967454	1.5115	0.966311	0.972315	2.09266	0.872004	0.857139	0.977788	1.04183	1.05777	0.758338	0.940919	1.58536	1.47057	0.861545	1.36938	0.821042	0.649658	0.813314	1.46355	1.32291	0.852692	0.72169	0.52197	1.36457	1.38923	0.906366	0.949817	1.01254	0.767605	0.76708	1.32233	0.975733	2.74415	1.10573	1.8256	2.11894	2.70938	0.878187	3.3224	0.850041
ACTN2	1.11237	1.41989	0.895183	1.02323	1.12774	0.970361	1.35724	0.789812	0.939583	1.17946	1.15837	0.761426	0.707504	0.900884	0.949195	0.612651	1.0951	1.09053	1.08382	1.11377	0.959556	1.31959	1.16129	1.20089	1.04004	1.04434	1.23939	0.934775	0.791677	1.14981	0.681963	0.842459	1.07168	1.34125	1.18248	2.40396	0.79332	1.56108	0.626318	0.921554	0.738315	1.07128	0.864478	0.633754	1.04466	1.33751	0.919349
ACTN3	0.808562	1.24719	0.873491	0.764218	1.02123	1.31098	0.914311	0.807527	1.0579	0.914311	0.254427	0.918035	0.680995	0.970041	1.6482	1.00608	1.8025	0.630383	1.23092	1.1622	1.21096	0.687139	0.859317	1.07157	1.224	1.08269	1.25173	1.63157	0.817503	0.873051	1.13921	1.69389	0.547842	1.22324	0.531261	0.539293	0.70105	0.62143	0.526774	1.04205	1.17767	0.854538	0.953851	1.0462	1.32421	0.807215	0.840573
ACTN4	1.24174	1.33707	1.2719	1.22761	1.22761	1.25775	1.28621	1.29979	0.818722	0.818722	0.83573	0.487607	0.803141	0.803141	0.979283	0.544475	0.759499	1.28621	1.25775	1.08596	0.998298	1.48699	1.31968	1.10642	1.03025	0.83573	1.03025	1.24174	1.22761	1.1433	1.24174	1.17265	1.31968	1.11868	1.31968	0.998298	1.31968	0.934939	1.03025	0.630363	1.04063	1.19619	1.25775	0.960694	1.25775	0.785486	1.2719
ACVR1	0.232663	0.16193	0.14692	0.248085	0.183885	0.184251	0.215942	0.168838	1.66493	1.54552	1.23737	2.18903	2.11928	1.75383	1.50949	1.62291	1.81512	0.234694	0.0930004	0.0900605	0.137416	0.191228	0.104795	0.164623	0.177389	0.0924511	0.0908541	0.140093	0.341038	0.157313	0.196189	0.26999	0.150072	0.246239	0.168998	0.135708	0.155668	0.228439	0.483976	0.234694	0.29987	0.201035	0.191139	0.673889	0.0573422	0.270208	0.268071
ACVR2B	1.17166	1.05277	1.40212	1.11013	1.11539	1.28316	1.16473	1.3544	0.767809	0.769768	1.00783	0.855886	0.782569	0.84062	0.714967	0.87045	0.735723	1.17831	1.00535	0.812727	0.835597	1.17166	1.17542	0.967998	1.14469	1.03756	1.11013	0.665456	1.08419	0.646289	0.90805	0.887547	0.90805	1.33341	0.947016	1.28671	1.08419	1.10109	0.985338	0.873872	0.868462	0.977937	1.05487	1.08917	0.761806	1.0062	1.19934
ACVRL1	0.864644	0.87386	1.49897	1.02935	1.00341	0.909674	1.20812	1.32499	1.0849	0.849861	0.855492	0.926531	0.924264	0.9557	0.703756	1.02465	0.961826	0.842592	1.13923	1.22597	0.794928	1.01976	1.32475	1.0416	1.09191	1.25921	0.959702	1.24463	1.5389	1.48208	1.36948	1.3666	1.40698	1.0622	1.48524	1.72353	1.80297	1.25209	1.46394	1.3615	0.881352	1.46076	1.07551	1.15401	2.1868	0.771318	0.923518
ADAM17	1.12917	0.987015	1.03031	0.911862	0.801801	1.05674	1.25382	0.79457	0.967788	0.996625	0.759833	1.07819	0.898896	1.0855	1.11035	1.08172	1.05581	0.738648	0.982336	0.812221	0.830464	0.877292	0.930788	0.780246	0.771416	0.677817	0.854143	0.847958	0.783674	0.876877	0.79299	0.8164	1.00012	1.02298	1.00746	0.939995	0.928151	0.685408	0.851328	0.830243	0.857523	0.917067	0.910945	0.840602	1.11571	0.800109	0.88267
ADCY1	1.15288	1.03345	1.47693	1.10034	1.01486	1.16187	1.30587	1.08844	1.02228	0.894785	0.84338	0.546024	1.0209	0.712886	0.911846	0.756127	0.957119	0.948774	0.878169	1.40992	1.25985	0.646601	0.615291	0.994859	1.00635	0.974857	0.79531	0.985299	1.01989	0.767664	1.39976	1.14978	1.16993	0.977828	0.89833	1.05073	0.616641	1.18161	0.951287	0.997074	0.968053	0.90357	1.45895	1.09272	1.59763	1.04865	1.13798
ADCY10	0.817423	0.784883	1.06925	0.806416	0.854128	0.762766	0.901601	0.788273	1.10172	0.91872	1.23755	1.31836	0.967227	1.2634	1.10835	1.19018	1.10975	1.11254	1.1013	0.763805	1.03237	0.980113	0.872751	0.854128	1.02623	0.832175	1.07037	0.916432	1.21874	0.944275	0.882648	0.825589	1.12203	1.11296	0.857474	1.14783	0.743189	1.23503	1.08979	1.19426	0.783025	1.35453	0.715098	1.11344	1.00783	0.998021	0.875885
ADCY2	1.59124	0.923949	1.25331	1.59337	1.38023	1.78186	0.986656	1.36796	0.735082	0.74057	0.802839	0.531226	0.782278	0.591521	0.81696	0.635016	0.485926	1.39782	0.896011	1.05106	0.857803	0.650493	0.863527	0.935586	0.943497	0.818033	0.683836	1.399	0.858018	0.79107	1.65386	0.57976	1.49717	0.698495	0.796975	1.43597	1.61721	0.732484	1.42025	1.18867	1.56156	0.611102	1.15386	1.36796	0.808922	0.834765	1.06512
ADCY3	1.23324	0.941356	1.48057	1.27602	0.845707	1.12698	1.44638	0.871698	0.71969	0.81032	1.26129	0.847088	1.08355	0.802663	0.722299	0.733373	0.797777	0.832305	0.901102	1.17169	0.748592	0.792481	0.711269	1.2875	1.15978	0.964218	1.3357	1.20746	1.23755	0.769716	0.923255	0.65002	0.635624	0.810581	1.02023	0.999254	0.858514	0.837826	1.15887	0.751596	0.761745	0.759884	0.790563	1.83337	1.34878	0.67649	1.06075
ADCY6	0.753772	0.750936	0.691869	1.01806	0.925238	0.787111	0.800651	1.27918	0.982396	1.08899	1.02931	1.48122	0.982396	1.13332	0.999615	1.24165	1.05429	0.678852	0.807357	0.884551	0.468374	0.584627	0.579366	0.745513	0.674145	0.638092	0.929678	1.08899	0.676698	0.911432	0.676698	0.817837	1.69627	1.26219	0.526366	0.793952	0.548989	1.26219	1.16862	0.866845	1.16862	0.462794	1.20354	1.28983	1.11666	1.04807	0.487622
ADCY7	0.889658	0.623731	0.570406	0.71911	0.764122	0.732754	0.605664	0.722345	1.46514	1.74496	0.859301	1.16383	1.23968	1.51068	1.10265	0.860742	1.42523	2.24103	0.507905	0.611494	1.52101	1.44164	1.30594	1.47724	1.37175	0.441883	0.964762	0.587737	1.48525	0.872624	0.541997	0.917253	0.833796	1.1174	1.06882	0.990509	1.12063	0.788716	1.29645	0.77968	1.28892	1.45598	0.856654	1.12746	0.959158	0.808599	1.77081
ADCY8	0.88018	0.773522	1.14075	0.890054	1.07453	0.929741	1.07237	0.76546	0.802143	0.84582	2.22378	1.53046	0.654319	0.902374	0.751307	0.832335	0.930857	0.884456	0.875463	1.1473	0.722537	0.750923	1.00491	0.667745	0.781287	1.05422	0.861085	1.21118	0.678919	0.97196	0.709261	0.898869	0.944777	0.799192	0.780229	1.01205	1.11969	1.45361	0.853953	0.931457	1.06717	0.568884	0.947727	0.958348	1.11541	0.82722	0.838005
ADCY9	0.649668	0.737673	0.699608	0.81102	0.814108	0.776524	0.683432	0.732659	1.229	1.27139	1.30014	1.47246	1.13975	1.28144	1.20988	1.40292	0.788324	1.17226	0.860912	0.812559	1.02612	0.980989	0.600128	0.808376	0.806371	1.02662	0.980795	0.721505	0.697822	0.758098	0.976818	0.798438	0.943778	1.06479	1.00458	0.636239	0.835074	0.877172	0.848707	0.510246	0.777	0.633607	0.760779	1.00304	0.71251	0.782069	1.07663
ADD1	0.986482	0.870871	1.26127	1.14069	1.05197	1.09557	0.968152	0.85897	0.874806	0.938063	1.11914	1.01775	0.784391	1.09588	1.02488	0.973058	0.938063	0.873721	0.979785	0.958702	0.910324	0.920654	0.846792	0.827624	0.792081	0.930951	0.95342	0.932837	0.912016	0.840271	0.980325	0.992393	1.70045	1.12035	1.07111	1.15891	0.877226	1.29375	1.25154	1.27207	1.14846	0.903671	0.980325	1.01316	1.11885	1.49687	0.830092
ADD3	0.885132	1.57418	1.80998	1.74276	0.958817	1.60022	1.30296	1.34852	0.640121	0.823786	0.753131	0.667444	0.559826	0.637456	0.59304	0.543746	0.558888	1.03177	1.18352	0.800863	1.18727	1.29656	1.46202	0.742461	0.731256	0.771373	1.24266	0.746407	0.949512	1.14554	0.892119	0.901468	1.66407	1.63319	1.54547	1.28267	1.45931	0.891338	0.902271	0.439917	0.715441	0.919067	1.11299	1.02714	1.02614	0.888229	1.82476
ADORA1	0.999291	1.21038	1.62139	0.759978	1.01618	0.906358	1.1021	1.04539	1.25393	0.926274	0.920906	0.92582	0.97773	0.924816	0.647114	0.882703	0.879626	1.14802	1.09799	1.05897	1.32312	1.04152	1.09459	0.688141	1.46547	0.741308	0.783506	0.756031	0.798313	0.669516	1.21861	1.43326	1.24873	0.884363	0.987867	1.5492	0.954388	1.48977	0.916031	1.27492	0.937712	1.16471	1.33469	0.804521	1.44512	1.08392	1.43931
ADRA1A	0.903107	1.05897	0.657942	1.23427	1.38975	1.39944	0.841676	1.13693	1.08146	1.18241	0.631125	0.618809	1.30561	0.687432	1.24335	0.71832	0.90941	1.28053	1.03452	1.15188	1.05954	0.841975	0.653294	1.24917	1.13787	1.33418	0.745185	0.768103	0.743406	1.09539	0.857491	0.594305	1.27602	1.11263	0.802051	0.795942	0.576219	0.835739	1.203	1.06706	1.28333	1.17366	1.69949	1.27013	0.656435	1.37369	1.44463
ADRA1B	0.916312	1.59848	1.15295	0.698015	0.819322	1.00773	1.10571	0.919232	1.39075	1.05794	1.0691	1.31635	0.820543	0.866727	0.748954	0.805728	0.706166	1.60009	1.59823	1.56118	0.624838	1.28286	0.803388	0.693699	1.17269	1.68014	1.02354	2.46045	0.725339	1.18767	1.60559	1.48524	0.570314	1.1647	0.896845	0.627032	1.24447	1.17366	0.508082	1.73161	0.68219	1.13587	1.29521	1.37806	1.03844	0.63683	1.09729
ADRA1D	1.01054	1.79868	1.01188	1.0981	1.28628	1.3732	0.898235	1.18377	0.887877	0.812356	1.38495	0.737245	0.652132	0.727393	0.779831	0.595856	0.761665	0.937772	0.985766	1.13406	1.52788	2.80577	1.00394	0.876523	0.868091	1.80515	1.47985	1.70141	1.1112	2.24512	1.21571	0.552538	0.746403	0.866578	0.604992	0.619125	0.996949	0.850471	0.515814	0.672615	0.546058	0.823723	0.488434	0.706373	1.47525	0.626902	1.49782
ADRA2B	1.44339	0.966194	1.91375	1.0075	0.884017	0.933407	1.08842	0.843964	0.772075	0.670838	1.01431	0.972882	0.802396	0.836436	1.13567	0.736791	0.977965	1.02362	1.12563	1.15217	0.941325	0.829503	1.2091	0.780807	1.0075	1.00347	0.889333	1.46746	1.19755	0.573042	1.27362	1.10122	1.52394	1.11134	1.32493	1.47188	1.55434	1.36262	1.12144	1.44558	0.86515	1.21331	1.17459	0.905202	1.60065	0.751696	0.729706
ADRA2C	1.18728	0.758864	0.501088	2.96013	0.223768	3.3694	0.522203	1.34176	1.43699	1.45576	0.223768	1.12121	0.223768	0.223768	0.233388	0.876133	0.340708	0.796926	2.36717	9.54453	1.79482	1.2455	2.5916	2.56466	0.494355	13.8147	0.913825	2.96477	1.12396	2.6586	1.47096	1.85842	0.987038	0.777357	1.47096	2.52844	0.856223	1.20273	0.560574	0.767404	1.19066	0.807072	0.369626	1.3976	0.614437	2.20998	1.12121
ADRB1	0.846603	1.06384	0.830352	0.643813	0.737617	0.933604	0.781052	0.868747	1.44062	1.22185	0.780466	1.15553	1.22719	1.0393	1.31861	1.23082	0.879984	0.956079	1.45725	1.4079	0.574795	0.918812	0.90485	0.887567	0.840628	0.827916	0.963915	2.35742	0.605779	1.49577	1.18627	1.76403	1.07387	1.22318	1.02703	0.849737	0.747509	1.71954	1.04376	3.84503	0.759784	1.05758	2.19927	1.74261	1.79822	1.15607	1.24679
ADRB2	0.85304	0.67141	1.53129	1.34268	1.18918	1.15835	1.05027	1.03193	0.644835	0.654191	1.09758	1.2373	0.487843	0.738396	1.2117	0.699309	1.40068	0.71733	1.0251	1.41514	1.45938	0.985089	1.00605	1.20183	0.751548	1.11338	1.19873	1.0952	0.430016	1.43741	0.841861	0.820276	1.43465	0.829599	0.467779	1.17472	1.16204	0.561596	0.791693	1.57598	0.906772	1.10664	0.860088	1.52555	0.936512	2.24691	0.674785
ADRB3	0.860224	1.48368	1.0944	0.964652	0.701609	0.796803	1.69891	1.54207	1.14667	1.42222	0.657079	1.14114	1.04671	0.617908	0.486275	0.617908	0.721747	0.964652	0.72428	1.03526	0.8377	1.12834	0.794178	1.28379	0.738229	0.700034	0.916224	0.703331	1.14937	0.780185	0.329713	1.36289	1.1199	1.02494	1.14791	0.946057	0.423635	1.45801	0.72994	0.93429	0.891196	0.937189	0.535867	1.0944	1.20634	0.834507	0.901645
ADRBK1	1.12068	1.1258	1.05665	1.2367	1.31647	1.3879	1.27051	1.07338	1.04892	0.799216	0.670349	0.655345	1.04184	0.711748	0.912351	0.646687	0.92544	1.50449	1.2667	0.892801	1.46324	1.49317	1.13358	1.59715	1.46258	0.960487	0.773676	1.15356	1.3039	0.86881	0.994541	0.918868	1.0535	1.40253	1.1352	0.999706	1.62899	0.64475	0.934723	0.910766	1.04858	1.4722	1.13715	1.28009	1.4008	0.901174	1.68734
ADRBK2	0.256864	0.147061	0.206674	0.159562	0.258386	0.273762	0.234096	0.291978	1.32058	1.48891	1.69089	3.0153	1.26901	1.75331	1.43236	1.9194	1.28186	0.125104	0.33723	0.205529	0.225291	0.182374	0.120652	0.549514	0.663303	0.465924	0.123082	0.618446	0.36792	0.175992	0.270664	0.283364	0.156638	0.117175	0.1128	0.17034	0.099091	0.379729	0.486419	0.435144	0.173654	0.275121	0.198574	0.208591	0.215529	0.187318	0.125104
AGO1	0.877287	0.994751	1.44283	0.894634	0.848033	0.793659	1.12082	0.950832	0.872778	0.764164	1.2918	1.41781	0.796189	1.0867	1.06861	1.12533	0.653777	0.729153	0.823097	0.760782	0.874445	0.99507	0.937678	0.550238	0.606297	1.05542	1.00309	0.998483	0.719865	0.598734	1.01801	0.829933	1.2913	1.12202	1.02118	1.22024	0.927168	1.35815	0.951878	1.04541	0.669349	0.941051	0.80654	0.745622	1.27525	0.738782	0.779084
AHR	0.60557	0.904196	0.523792	0.464946	0.408413	0.544056	0.560932	0.660637	1.56125	1.33305	1.26733	1.29392	1.5535	1.41838	1.45335	1.18379	1.26289	0.318082	0.472973	0.938367	1.09976	0.185771	0.553453	0.844815	0.777525	0.518436	0.530412	2.71776	0.24525	0.526421	0.886633	0.410418	0.426768	0.530013	0.673413	0.49923	0.547685	0.383088	0.456731	0.855424	0.42375	0.969911	0.931951	0.403359	1.34638	0.547439	0.427526
AIFM1	1.43372	1.49092	1.61384	1.42194	1.39212	1.68136	1.36857	1.21275	0.657756	0.751394	0.387783	0.502847	0.700238	0.657756	0.579413	0.570779	0.57682	0.949765	1.07567	0.861534	1.24139	0.89455	1.21275	1.09067	1.07567	1.09067	1.09716	0.786981	1.07038	0.937643	1.20649	1.16387	1.32102	1.19079	1.29726	1.16387	1.36857	0.755488	0.882084	0.703594	0.905622	1.26354	1.07038	0.830243	0.819146	1.16387	1.14417
AIP	0.755952	1.23475	0.971491	1.16901	0.99937	1.40881	1.45368	1.59806	0.798076	1.12026	0.541482	0.620592	1.03769	0.627976	1.01515	0.932833	0.714815	0.708884	1.64753	0.824296	0.861269	1.72141	1.15437	1.23648	1.10917	2.16302	0.584077	1.46029	1.00569	0.734841	1.05622	1.67327	0.521333	1.14858	0.690555	0.468479	0.904567	0.899272	0.794668	0.599413	1.17477	0.464476	1.31097	0.84526	1.35302	1.66243	0.511289
AKAP1	1.19249	1.56634	1.13825	1.33019	1.09154	1.32356	0.951749	0.664938	1.08784	0.947612	0.998714	0.827662	0.692485	0.523037	0.778172	1.01896	0.866477	0.989289	1.3923	0.855262	1.46225	1.26479	1.17449	1.31527	1.49863	0.809257	0.658111	0.927782	1.08978	1.62975	1.47272	0.756984	1.06597	1.24141	1.25815	0.504463	1.68318	1.00461	0.880992	1.97443	1.21479	1.14379	1.71715	1.10239	1.13142	1.24318	1.52991
AKAP10	0.878634	0.821891	0.858181	1.59529	0.856559	0.949499	1.10275	0.803291	0.461131	1.21141	1.78785	1.13512	0.520388	1.64472	0.752036	1.1903	0.430954	1.29017	1.2441	0.688632	1.30891	0.942875	1.15769	1.47455	1.11797	1.25868	1.59446	1.31251	1.06197	1.68728	1.21842	1.3198	0.987168	1.12337	1.36504	0.640807	1.64472	0.777552	1.46775	0.56077	1.3029	0.537871	1.83082	1.45652	1.04927	1.53419	0.735351
AKAP11	0.888768	0.890518	0.934189	0.958799	1.07231	1.17243	1.14212	1.00335	0.912906	0.893147	0.955651	0.986407	0.895548	1.09832	1.05264	1.06037	1.08252	0.646417	0.815411	1.02001	0.890518	0.936365	0.867318	1.00307	0.84713	0.825491	1.02679	1.01913	0.67905	1.02622	0.890731	0.982313	0.739715	0.763506	0.666154	0.593935	1.00811	0.60431	0.628848	0.832761	0.793859	0.696266	0.890088	0.871526	1.07798	0.819954	0.786448
AKAP12	1.02853	1.30871	0.629565	1.22888	1.21536	1.2954	1.00926	1.56008	0.894895	0.854165	0.737126	0.856665	0.901514	0.789273	0.977847	0.782469	0.93027	0.970665	1.18317	1.35087	1.10021	1.27488	1.0668	0.938441	0.812984	0.916519	0.825378	1.38449	0.761302	1.03296	1.60787	0.758661	0.718314	1.00269	0.913117	1.03425	1.32754	1.05472	0.603786	1.15379	0.975667	0.850191	0.830792	0.98115	0.711575	1.38945	0.730618
AKAP13	0.969089	1.04105	1.19688	1.18807	0.925135	0.926987	1.10766	1.08053	0.911562	0.926987	0.919302	0.925835	0.913411	0.919302	0.978346	0.930147	1.1397	0.924432	0.920007	1.11678	1.00759	0.863716	1.24969	0.932685	1.15103	1.16563	1.10339	1.03008	1.04071	0.966049	1.1154	1.05147	1.09093	1.00262	0.926766	1.22657	1.20529	1.17948	1.04942	1.13263	1.03177	1.06479	1.0692	0.951935	1.07277	0.775178	1.02666
AKAP3	0.533541	0.533541	0.533541	0.533541	0.533541	0.533541	0.533541	0.533541	0.533541	0.533541	4.88677	0.533541	0.533541	0.533541	4.11012	0.533541	0.533541	0.533541	0.533541	2.33131	0.533541	0.533541	0.533541	1.69752	0.533541	0.533541	0.533541	0.533541	0.533541	0.595444	0.533541	0.533541	0.533541	0.533541	1.34307	0.533541	0.533541	0.533541	0.533541	0.533541	0.533541	0.533541	0.533541	0.533541	0.533541	0.533541	0.533541
AKAP4	0.196821	0.265799	0.140389	0.141697	0.227675	0.122109	0.144673	0.201568	1.95438	2.09294	1.51581	2.21388	1.38281	1.76395	1.46506	1.56725	1.6032	0.240897	0.275032	0.39087	0.302468	0.247982	0.301353	0.200378	0.188903	0.17526	0.290841	0.182131	0.215149	0.672839	0.269518	0.507394	0.33153	0.216182	0.295264	0.260202	0.237856	0.573138	0.474044	0.265057	0.529674	0.334449	0.289871	0.268558	0.841298	0.451467	0.1762
AKAP5	0.934328	0.574699	1.34212	1.27598	0.772932	0.753174	1.24465	0.537633	0.938927	1.22779	0.759518	1.47497	1.05259	1.06937	0.866994	1.17774	0.996592	0.901495	1.02355	0.810773	0.939418	0.801146	1.0351	0.530414	0.802191	0.746862	1.01201	0.883763	1.08705	0.98998	0.905112	1.15742	1.2185	0.946242	1.0007	1.49075	1.06535	1.06156	1.46608	1.37175	0.934206	1.25628	0.837414	0.77924	1.11018	0.831847	0.738134
AKAP6	1.44832	1.00716	0.893192	1.20734	1.33498	1.72322	1.1245	1.22634	0.860815	0.830169	0.610558	0.821323	0.851883	0.843975	0.632523	0.831732	0.751976	1.99221	1.36833	1.17344	0.684226	1.17629	1.45968	1.58625	1.86403	0.393452	0.911511	0.683171	1.40892	1.18457	2.24629	0.931855	1.2064	0.979937	1.87031	1.54681	1.47639	1.17149	1.27591	0.957118	1.71497	1.73577	0.898035	0.771437	0.737998	0.584973	2.46485
AKAP7	0.882245	0.809968	0.80882	0.482778	0.96016	0.76747	0.75089	0.809496	1.16353	1.17876	1.19582	1.26977	1.16212	0.97689	1.29809	1.15596	1.32722	1.02345	0.955838	0.550632	0.920849	0.871682	0.753432	0.74401	0.76925	1.03205	0.693401	0.85861	0.76925	0.973976	0.923351	0.845757	0.88485	0.919178	0.93141	0.893622	0.789819	0.783898	0.939063	0.880571	1.15453	0.913261	1.05494	0.990618	0.907641	1.19406	0.898876
AKAP8	1.12872	1.04904	1.23341	0.934475	1.23616	1.15246	1.29252	0.999697	1.0257	0.972523	0.733537	1.04727	0.816873	0.934802	0.785538	0.769259	0.888007	1.12872	1.10893	1.06324	1.21496	0.881486	0.993375	1.34978	0.774422	1.52394	1.38874	1.22883	1.13107	1.18618	1.52343	0.247312	1.34065	0.935963	1.4871	1.17817	1.2308	0.83353	0.701339	1.21246	0.886485	1.26336	0.902864	0.737819	1.19833	1.42843	1.16001
AKAP9	0.961789	1.26631	1.3459	0.887071	0.864033	0.758822	1.0449	1.05052	0.937341	0.726558	1.22216	1.27653	0.712752	0.997472	0.898776	1.01844	1.03062	0.83557	1.07121	0.892567	0.857719	0.838352	1.01978	0.76825	0.890753	1.01038	0.917649	0.948025	0.831768	0.868814	0.823712	1.09136	0.954897	1.04034	0.849971	0.939912	1.02039	0.921241	0.790902	1.43036	0.751071	1.0991	0.805708	0.749191	1.15275	0.802926	0.761398
AKT1	1.01925	0.990135	0.473521	0.972398	0.878564	0.833175	1.35265	1.24138	1.16286	1.26921	0.793793	0.689175	1.21861	0.981366	0.906878	0.806096	1.41094	0.394621	0.523041	1.59671	1.25701	0.513511	0.427407	0.919637	0.361053	0.227104	3.57914	2.78382	0.643548	0.801915	3.90184	1.10598	0.380218	0.855355	0.135213	0.210604	0.575568	0.416727	0.616518	0.883971	2.72868	0.456187	2.61788	1.67045	0.34784	6.10405	0.380218
AKT2	0.808412	0.948804	0.593197	0.467164	0.717496	0.797893	1.36379	0.963758	1.34878	1.17825	1.38985	0.870244	1.4864	1.40271	0.680896	1.33275	0.649605	0.746805	0.547772	1.73204	0.563188	0.726005	0.617984	0.352953	0.521601	0.945473	0.534211	1.53494	0.641538	1.02419	0.833106	0.834871	1.04276	1.21213	0.5919	1.46014	0.470723	0.463194	0.629021	2.26466	1.94716	0.486256	3.30786	2.75795	0.602385	2.32453	0.735392
AKT3	0.518726	0.761777	0.566069	0.522173	0.7162	0.472204	0.881758	0.660118	0.874343	1.00193	1.53088	2.04116	0.895238	1.55058	1.71622	1.77514	0.515478	0.648886	0.736845	0.712885	0.594725	1.06301	0.400005	0.657862	0.64196	0.633942	0.7772	0.843185	0.588934	0.780593	0.788768	0.605798	0.555284	0.773485	0.575277	0.418505	0.492998	0.648736	0.433548	0.564612	0.401836	0.475861	0.67063	0.808651	0.658251	0.767867	0.624666
ALK	0.938172	0.988943	1.06484	1.01218	0.777165	0.863562	1.17176	1.05894	1.01997	0.761737	1.07684	1.20413	1.00641	1.0495	0.984238	1.14205	0.879581	0.760466	1.08294	1.47863	0.973651	0.683744	1.25769	0.656677	0.984514	1.24757	0.997694	1.34685	0.923929	1.13393	0.959303	1.3444	1.0119	0.880852	0.917238	1.0793	1.32875	1.04762	1.12231	1.19479	0.98141	1.05295	1.0446	0.943883	1.22999	1.00239	0.809911
ANAPC10	0.775244	0.865739	1.23095	0.787401	0.808683	0.874741	0.866798	0.791327	1.12736	1.13499	1.21126	1.1596	0.887954	1.25415	0.839851	1.22027	1.16368	1.32011	1.04748	0.834555	1.1431	0.920677	1.05453	0.598796	0.860281	0.65342	1.36101	0.996915	0.798367	0.726475	1.09212	0.815699	1.29584	0.952992	1.00617	1.31769	0.970064	1.81745	1.27684	1.10545	0.809487	1.34222	0.825615	0.945973	1.38012	0.676565	1.01594
ANAPC13	1.09418	1.12563	1.29295	1.4053	1.06861	0.875236	1.04123	0.925657	0.760481	1.11223	0.793064	0.973371	0.824248	0.792014	1.10489	0.925306	0.885596	1.99457	2.25762	1.42849	0.613819	2.42826	1.34696	2.26333	2.29167	2.79725	2.46417	1.10569	1.20791	0.741244	1.29596	0.782573	1.0263	1.31693	0.800804	0.827595	1.7946	0.690585	0.988375	1.2009	1.39449	1.15603	0.753523	0.846311	0.864697	0.55292	2.0893
ANAPC2	0.664999	0.664999	0.664999	0.680572	0.664999	0.664999	0.664999	1.29993	0.664999	0.664999	4.22875	0.664999	2.14576	0.664999	0.664999	0.664999	0.664999	1.80345	0.664999	2.53436	0.664999	0.664999	0.664999	4.49466	3.11957	0.823631	0.664999	1.03749	1.28838	1.73442	1.00378	0.664999	0.664999	0.664999	0.664999	0.664999	0.664999	0.908593	0.664999	0.664999	1.83554	3.94709	0.664999	1.98038	1.3484	0.664999	0.664999
ANAPC5	1.1189	1.04537	0.85161	0.798808	1.2579	1.07137	0.983562	0.87891	0.983852	0.994059	1.09895	1.33095	0.666797	1.02074	0.909569	0.909806	1.07884	1.05797	1.02844	1.06107	0.559603	1.14646	1.04927	0.820742	0.953825	0.88294	1.00036	1.01711	1.32373	1.07884	1.2005	0.595485	1.20016	0.845634	0.977712	1.40298	0.898054	0.831129	1.09271	0.85901	1.14928	0.776669	0.940433	0.853268	1.25253	0.84396	0.823864
ANGPT1	1.04912	1.76653	1.31643	0.668917	0.506069	1.15207	0.976188	1.15334	0.743657	1.78159	1.40151	0.778311	0.50449	0.709264	0.693326	0.925975	0.873222	1.74222	0.722432	1.1802	0.950641	1.01527	0.976816	1.17311	0.967003	1.63445	1.2947	1.27127	1.46265	1.91555	2.15345	0.750263	0.487267	0.792672	0.558287	1.8508	1.91948	0.862479	0.61582	1.48998	1.14301	1.64532	1.22077	0.695931	1.59067	0.547562	0.847923
ANGPT2	1.13489	1.10174	1.20387	0.942326	1.10572	0.814944	0.864684	0.926266	0.862877	1.06749	1.09124	0.906793	1.02825	0.815811	1.07513	1.00001	1.05796	1.00679	0.952265	0.885744	0.912189	1.08145	1.03796	0.986028	1.04229	4.09411	0.98311	0.871208	1.05465	0.933249	1.05668	1.01967	0.946204	1.10073	0.979542	0.929196	1.03685	0.904904	0.941345	0.951588	1.01067	0.953911	1.14811	0.904904	0.890259	1.03101	0.829196
ANGPT4	1.02546	0.836429	1.02368	1.0861	0.96351	0.957057	0.971047	0.907042	0.917553	0.863809	1.23594	0.915383	1.33866	0.935531	0.833313	1.14219	1.04731	1.91266	0.806739	1.16985	0.977359	1.42302	0.890288	1.11074	1.21972	1.17865	0.730441	0.879933	0.914711	1.00738	1.01751	0.966334	0.907375	1.1564	0.880507	0.64899	1.68007	0.773041	0.78855	1.11598	1.4498	0.942533	0.874174	1.30774	0.601675	1.18783	2.05022
APAF1	0.966339	0.96347	1.18368	1.20046	1.1443	1.30684	1.31625	0.86693	0.834109	0.823204	0.878898	1.16699	0.846969	0.928119	0.927396	0.916559	0.729498	0.960397	0.924265	0.966655	1.14167	0.830346	0.973101	0.990515	1.0837	1.57774	1.14393	0.984071	0.809948	0.950788	1.11247	0.905622	1.02234	1.09597	1.1027	0.897801	0.937253	0.98487	0.825417	0.982251	0.964583	0.868057	0.849259	1.09183	1.10951	1.25777	0.935071
[truncated: 1,692 more rows]

## Sheet: pas. gse37307
Pathway name	GSM915755	GSM915756	GSM915757	GSM915758	GSM915759	GSM915760	GSM915761	GSM915762	GSM915763	GSM915764	GSM915765	GSM915766	GSM915767	GSM915768	GSM915769	GSM915770	GSM915771	GSM915772	GSM915773	GSM915774	GSM915775	GSM915776	GSM915777	GSM915778	GSM915779	GSM915780	GSM915781	GSM915782	GSM915783	GSM915784	GSM915785	GSM915786	GSM915787	GSM915788	GSM915789	GSM915790	GSM915791	GSM915792	GSM915793	GSM915794	GSM915795	GSM915796	GSM915797	GSM915798	GSM915799	GSM915800	GSM915801
[truncated: 334 more rows]
