# Supplementary material for: Molecular pathway activation features of pediatric acute myeloid leukemia (AML) and acute lymphoblast leukemia (ALL) cells
Source: Aging (Albany NY). 2016 Nov 19;8(11):2936–46. doi: 10.18632/aging.101102 (PMC5182073; doi:10.18632/aging.101102)
Supplement: Supplementary file 5 [file aging-08-2936-s005.xlsx]

## Sheet: mean.markerALL.ca.cnr
	ALL.repr.	AML.repr.	Norm.repr.	AUC_value
AATK	1.719	1.678	1	1
ABI1	0.598	0.474	1	1
ADCY6	2.773	2.463	1	1
ANAPC13	0.539	0.601	1	1
ANAPC2	2.693	3.039	1	1
ANAPC4	2.206	3.315	1	1
ANGPT2	2.132	1.632	1	1
ATP2C1	2.128	2.116	1	1
BHLHE40	1.526	1.085	1	1
CACNG1	2.02	1.698	1	1
CAMK2B	1.702	1.798	1	1
CCL27	1.429	1.318	1	1
CCR6	0.53	1.713	1	1
CDC16	1.468	1.415	1	1
CHRNA10	1.464	0.971	1	1
CHRNA2	1.528	0.95	1	1
COL5A2	0.367	0.781	1	1
CXCL11	0.685	0.591	1	1
DCC	0.525	0.672	1	1
DKK1	0.286	1.685	1	1
ECM2	0.683	0.458	1	1
FGF14	0.306	0.59	1	1
FGF23	0.483	0.558	1	1
FGF5	0.339	0.812	1	1
FGF6	0.567	0.587	1	1
FGF9	0.533	0.603	1	1
FGFR2	0.667	0.792	1	1
FZD3	0.372	0.702	1	1
GABRG2	0.34	0.299	1	1
GABRG3	0.785	0.728	1	1
GAS1	0.593	0.511	1	1
GNA13	0.303	0.384	1	1
GNAL	1.297	1.146	1	1
GNB1	0.658	0.847	1	1
GNB2L1	0.533	2.369	1	1
GNG12	0.292	0.83	1	1
GRK5	0.399	1	1	1
H3F3A	0.747	0.755	1	1
HAPLN1	0.611	0.575	1	1
HIST1H3J	0.34	0.488	1	1
HLA-DQA1	0.548	0.578	1	1
HSPA1A	0.104	0.798	1	1
IFNB1	0.694	1.021	1	1
IFNG	0.526	0.736	1	1
IKBKG	0.469	0.577	1	1
IL12RB2	0.583	0.559	1	1
IL6ST	0.557	0.538	1	1
IL7R	0.628	0.69	1	1
IRAK4	0.706	0.953	1	1
ITGB3	0.634	0.883	1	1
ITK	1.294	1.075	1	1
ITPR3	0.329	0.993	1	1
JAK1	0.399	0.575	1	1
JUND	0.406	2.377	1	1
KCNK12	0.54	1.057	1	1
KLRC3	0.505	0.557	1	1
MAPK11	0.583	0.767	1	1
MYH10	0.561	0.859	1	1
MYH9	0.637	0.779	1	1
MYO10	0.664	0.991	1	1
NRG2	0.68	0.977	1	1
PF4	0.182	0.282	1	1
PKIA	0.348	0.344	1	1
PPP1R10	0.638	0.684	1	1
PPP1R3B	0.733	0.528	1	1
PPP2CB	1.644	1.053	1	1
PPP2R5D	1.286	1.265	1	1
PSMA3	1.429	1.067	1	1
PSMA7	1.814	1.247	1	1
PYGO2	1.918	1.515	1	1
RAC2	1.371	1.466	1	1
RAC3	2.788	2.175	1	1
RAPGEF3	1.377	1.547	1	1
RASA2	1.234	1.057	1	1
RGS14	0.701	0.881	1	1
RGS20	1.446	1.343	1	1
ROR1	1.764	1.719	1	1
SCN1B	0.703	0.791	1	1
SNAI2	1.443	1.151	1	1
SOCS1	1.548	1.135	1	1
SOS2	1.781	1.043	1	1
SPOCK1	1.79	1.316	1	1
SPP1	0.546	0.731	1	1
TCP1	0.548	0.564	1	1
TUBE1	0.654	0.653	1	1
UBA1	1.859	1.02	1	1
UBD	2.048	2.038	1	1
UBE2L6	1.677	1.391	1	1
UBR1	1.885	1.655	1	1
UBTF	1.845	1.13	1	1
USP21	2.459	2.144	1	1
USP46	1.74	0.925	1	1
WNK1	1.607	1.036	1	1
WNT4	1.65	1.485	1	1

## Sheet: ALL_PAS markers
Pathway name	Mean PAS value	AUC_value
Akt_Signaling_Pathway	-0.045	0.904762
Akt_Signaling_Pathway_Regulation_of_Na+_Transport	0.47	0.952381
Akt_Signaling_Pathway_Synaptic_Transmission	-0.114	0.952381
ATM_Pathway_Cell_Cycle_Checkpoint_Control	0.282	0.904762
cAMP_Pathway_Glycogen_Synthesis	0.148	0.904762
cAMP_Pathway_Metabolic_Energy	-0.152	0.952381
cAMP_Pathway_Oncogenesis	0.157	0.904762
Cellular_Apoptosis_Pathway	0.041	0.904762
Estrogen_Pathway	-0.079	1
Glucocorticoid_Receptor_Signaling_Pathway_Cell_Cycle_Progression	0.335	1
Glucocorticoid_Receptor_Signaling_Pathway_Gene_Expression_via_CREB3_STAT5B_SLC22A2_POU2F1	0.263	1
GPCR_Pathway	-0.076	1
GSK3_Signaling_Pathway	0.046	1
GSK3_Signaling_Pathway_Gene_Expression_via_CTNNB1	0.067	0.904762
Hedgehog_Signaling_in_Mammals_no_Tubulin_Pathway	-0.329	1
HGF_Pathway_Cell_Cycle_Progression	-0.211	0.904762
HGF_Pathway_Regulation_of_Cytoskeleton_Cell_Polarity_and_Cell_Motility	0.173	1
HIF1Alpha_Pathway	0.129	0.904762
HIF1Alpha_Pathway_HIF1a_Degradation	-0.58	1
HIF1Alpha_Pathway_p53_Hypoxia_Pathway	0.189	1
IGF1R_Signaling_Pathway_Protein_Synthesis	0.242	1
IL-2_Pathway_IL2_Gene_Expression_via_POLR1E_EGR1_HMGA1_ELF1_POU2F1_MYC	-0.141	0.952381
ILK_Signaling_Pathway	-0.055	0.904762
ILK_Signaling_Pathway_Cell_Adhesion	0.218	0.904762
ILK_Signaling_Pathway_Opsonization	0.185	0.952381
JAK-STAT_Pathway_Gene_Expression_via_MYC	-0.332	0.952381
JNK_Pathway_Insulin_Signaling	0.149	0.952381
MAPK_Signaling_Pathway_Cell_Motility_Inflammation_Apoptosis_Osmoregulation	-0.17	1
Mitochondrial_Apoptosis_Pathway_DNA_Fragmentation	-0.098	0.904762
mTOR_Pathway_Translation_Elongation	0.206	0.952381
NGF_Pathway_Actin_Polymerization_Neurite_Outgrowth_and_Differentiation	0.169	0.952381
Notch_Signaling_Pathway_gamma_Secretase	0.271	1
PPAR_Pathway_Adipocyte_Differentiation_Glucose_Homeostasis_and_Macrophage_Function	0.067	0.904762
PTEN_Pathway_Angiogenesis_and_Tumorigenesis	-0.075	0.904762
Ras_Pathway	-0.071	1
Ras_Pathway_Gene_Expression_Cell_Proliferation_Cell_Survival_Differentiation_Development_Cell_Cycle_Control_Cell_Motility_Tumorigenesis_via_ELK4_ATF2_MEF2D_STAT2_CREB3_CCNA1_MYC_ELK1_JUN_CDK4	-0.096	0.952381
Ras_Pathway_Receptor_Endocytosis	0.203	1
TGF-Beta_Pathway_Post_Transciptional_G1_Arrest	0.242	0.904762
TNF_Signaling_Pathway_Apoptosis	0.222	0.904762
TNF_Signaling_Pathway_Gene_Expression_and_Cell_Survival_via_FOS_NFKB2_JUN_ELK1_ATF6	-0.16	1
TRAF_Pathway_Apoptosis	0.385	0.952381
VEGF_Pathway_Focal_Adhesion_Turnover	0.279	0.904762
WNT_Pathway	-0.064	1
WNT_Pathway_Cell_Survival	-0.199	1
WNT_Pathway_Cytoskeletal_Rearrangement	-0.439	1
WNT_Pathway_Gene_Expression_via_CREB3	-0.179	1
WNT_Pathway_PKC_Pathway	-0.211	1

## Sheet: ALL_CNR markers
Gene name	Mean CNR	AUC_value
AATK	1.719	1
ABI1	0.598	1
ADCY6	2.773	1
ANAPC13	0.539	1
ANAPC2	2.693	1
ANAPC4	2.206	1
ANGPT2	2.132	1
ATP2C1	2.128	1
BHLHE40	1.526	1
CACNG1	2.02	1
CAMK2B	1.702	1
CCL27	1.429	1
CCR6	0.53	1
CDC16	1.468	1
CHRNA10	1.464	1
CHRNA2	1.528	1
COL5A2	0.367	1
CXCL11	0.685	1
DCC	0.525	1
DKK1	0.286	1
ECM2	0.683	1
FGF14	0.306	1
FGF23	0.483	1
FGF5	0.339	1
FGF6	0.567	1
FGF9	0.533	1
FGFR2	0.667	1
FZD3	0.372	1
GABRG2	0.34	1
GABRG3	0.785	1
GAS1	0.593	1
GNA13	0.303	1
GNAL	1.297	1
GNB1	0.658	1
GNB2L1	0.533	1
GNG12	0.292	1
GRK5	0.399	1
H3F3A	0.747	1
HAPLN1	0.611	1
HIST1H3J	0.34	1
HLA-DQA1	0.548	1
HSPA1A	0.104	1
IFNB1	0.694	1
IFNG	0.526	1
IKBKG	0.469	1
IL12RB2	0.583	1
IL6ST	0.557	1
IL7R	0.628	1
IRAK4	0.706	1
ITGB3	0.634	1
ITK	1.294	1
ITPR3	0.329	1
JAK1	0.399	1
JUND	0.406	1
KCNK12	0.54	1
KLRC3	0.505	1
MAPK11	0.583	1
MYH10	0.561	1
MYH9	0.637	1
MYO10	0.664	1
NRG2	0.68	1
PF4	0.182	1
PKIA	0.348	1
PPP1R10	0.638	1
PPP1R3B	0.733	1
PPP2CB	1.644	1
PPP2R5D	1.286	1
PSMA3	1.429	1
PSMA7	1.814	1
PYGO2	1.918	1
RAC2	1.371	1
RAC3	2.788	1
RAPGEF3	1.377	1
RASA2	1.234	1
RGS14	0.701	1
RGS20	1.446	1
ROR1	1.764	1
SCN1B	0.703	1
SNAI2	1.443	1
SOCS1	1.548	1
SOS2	1.781	1
SPOCK1	1.79	1
SPP1	0.546	1
TCP1	0.548	1
TUBE1	0.654	1
UBA1	1.859	1
UBD	2.048	1
UBE2L6	1.677	1
UBR1	1.885	1
UBTF	1.845	1
USP21	2.459	1
USP46	1.74	1
WNK1	1.607	1
WNT4	1.65	1
