# Supplementary material for: Molecular pathway activation features of pediatric acute myeloid leukemia (AML) and acute lymphoblast leukemia (ALL) cells
Source: Aging (Albany NY). 2016 Nov 19;8(11):2936–46. doi: 10.18632/aging.101102 (PMC5182073; doi:10.18632/aging.101102)
Supplement: Supplementary file 6 [file aging-08-2936-s006.xlsx]

## Sheet: AML_CNR markers
Gene name	Mean CNR	AUC_value
AATK	1.678	1
ABI1	0.474	1
ABL1	1.387	1
ACTA1	2.628	1
ADCY6	2.463	1
AKAP7	2.064	1
ANAPC2	3.039	1
ANAPC4	3.315	1
ARHGEF11	1.739	1
ATF2	0.699	1
ATP2C1	2.116	1
BAD	2.007	1
BBC3	1.774	1
BCAR1	2.007	1
BID	1.719	1
BMP4	2.003	1
BMP8A	1.765	1
BTC	1.708	1
CACNA2D4	1.714	1
CACNB1	1.643	1
CAMK1G	0.646	1
CAMK2B	1.798	1
CAMKK2	1.826	1
CASP2	2.374	1
CAV2	3.023	1
CBL	2.238	1
CCL27	1.318	1
CCNF	1.841	1
CCNG1	1.822	1
CCR3	2.252	1
CD2	1.43	1
CDC16	1.415	1
CDH1	0.652	1
CDH26	1.708	1
CDK16	1.56	1
CHRNG	4.636	1
CLNS1A	2.275	1
COL8A1	2.128	1
CREM	0.58	1
CXCL12	1.447	1
CXCL6	0.51	1
ECM2	0.458	1
EIF4B	2.271	1
ELK3	1.687	1
EPS8	0.474	1
ERBB3	1.769	1
F2	0.509	1
FAS	0.637	1
FGF10	1.74	1
FGF18	2.378	1
FGF23	0.558	1
FGF6	0.587	1
FGF9	0.603	1
FOXO3	1.743	1
FRZB	0.506	1
GABRA5	2.091	1
GABRG1	0.568	1
GABRG2	0.299	1
GABRG3	0.728	1
GDF2	0.569	1
GNA13	0.384	1
GNG8	0.72	1
GNRH1	2.259	1
GRIA3	1.813	1
GRM7	2.086	1
GTF2E1	0.513	1
GTF2H1	0.645	1
H3F3B	0.719	1
HAPLN1	0.575	1
HCK	1.682	1
HIST1H3B	1.786	1
HIST1H3F	3.154	1
HIST1H3G	3.072	1
HLA-DMA	1.675	1
HLA-DQA1	0.578	1
HNF4A	0.42	1
IFNA14	0.354	1
IGF2	2.549	1
IKBKG	0.577	1
IL23R	1.414	1
INS	2.082	1
ITGB7	2.411	1
ITPR2	1.787	1
JAK3	0.791	1
KCNK3	1.712	1
KCNK4	1.805	1
KCNU1	0.467	1
KCNV1	0.515	1
KDR	2.032	1
KLRC3	0.557	1
KREMEN2	1.391	1
LAMB4	0.466	1
LIMS2	0.553	1
LIPE	0.382	1
LMTK2	0.487	1
MAPK13	0.577	1
MAPK4	1.921	1
MAPK7	0.724	1
MAPKAPK2	1.661	1
MED1	0.609	1
MEF2D	1.961	1
MET	1.223	1
MITF	2.392	1
MMP10	0.532	1
MMP12	0.431	1
MMP14	1.736	1
MYH3	1.946	1
MYL9	1.796	1
MYO18B	0.678	1
MYO9A	0.666	1
OSM	1.516	1
PARP10	1.298	1
PDK1	0.549	1
PFKM	0.451	1
PKIA	0.344	1
PLCB2	0.431	1
PLCG2	0.669	1
POLR1B	2.009	1
PPARA	1.605	1
PPP1R3C	0.439	1
PPP2R5C	2.488	1
PROK1	0.639	1
PSEN1	0.517	1
PSMB3	1.33	1
PTPRC	0.646	1
PYGO2	1.515	1
RAC3	2.175	1
RAPGEF3	1.547	1
RGS2	0.733	1
RGS20	1.343	1
ROR1	1.719	1
RPTOR	0.623	1
SAR1B	2.529	1
SHC1	1.661	1
SMAD6	1.662	1
SMAD9	0.274	1
TAB1	2.293	1
TBP	1.76	1
TDGF1	0.301	1
TIE1	2.119	1
TNFSF14	2.8	1
TUBB4B	0.643	1
UBA5	1.689	1
UBR2	0.556	1
USP12	0.54	1
USP18	0.576	1
USP32	2.176	1
WNT7B	1.582	1

## Sheet: AML_PAS markers
Pathway name	Mean PAS	AUC_value
Akt_Signaling_Pathway_Splicing_Regulation	0.348	0.952381
ATM_Pathway_Apoptosis	0.411	1
ATM_Pathway_Apoptosis_and_Senescence	0.138	0.952381
ATM_Pathway_Cell_Cycle_Checkpoint_Control	0.36	1
ATM_Pathway_Checkpoint_Activation	0.225	0.952381
ATM_Pathway_G2-Mitosis_progression	0.168	0.952381
CD40_Pathway_Cell_Survival	-0.279	1
Chemokine_Pathway_Gene_Expression_and_Apoptosis_via_ELK1	-0.101	1
EGF_Pathway_IP3_Signaling	-0.493	1
EGF_Pathway_Rab5_Regulation_Pathway	-0.454	0.952381
Glucocorticoid_Receptor_Signaling_Pathway_Gene_Expression_via_CREB3_STAT5B_SLC22A2_POU2F1	0.144	1
IGF1R_Signaling_Pathway_Gene_Expression_Proliferation_Growth_Survival_via_NFAT5_CREB3	0.152	0.952381
ILK_Signaling_Pathway_Cell_Adhesion	0.359	1
ILK_Signaling_Pathway_Opsonization	0.318	1
IP3_Pathway_Gene_Expression_via_CREB3_NFATC2_MEF2D	0.145	1
JAK-STAT_Pathway_Gene_Expression_via_MYC	-0.31	0.952381
Mitochondrial_Apoptosis_Pathway_DNA_Fragmentation	-0.148	1
Mitochondrial_Apoptosis_Pathway_Gene_Expression_via_TP53	0.14	0.952381
mTOR_Pathway_VEGF_Pathway	0.403	1
NGF_Pathway_Actin_Polymerization_Neurite_Outgrowth_and_Differentiation	0.175	1
p38_Signaling_Pathway_Actin_Cytoskeleton_Reorganiztion	0.17	0.952381
p53_Signaling_Pathway_Apoptosis	0.058	1
PPAR_Pathway_Adipocyte_Differentiation_Glucose_Homeostasis_and_Macrophage_Function	0.352	1
Ras_Pathway_CDC42_Pathway	0.336	1
Ras_Pathway_Receptor_Endocytosis	0.272	1
STAT3_Pathway_Anti-Apoptosis	-0.361	0.952381
TGF-Beta_Pathway_Transciption_Arrested_Growth_Apoptosis	-0.158	0.952381
TNF_Signaling_Pathway	0.136	1
TNF_Signaling_Pathway_Apoptosis	0.323	1
TRAF_Pathway_Apoptosis	0.358	1
VEGF_Pathway_Actin_Reorganization	0.353	0.952381
