# Supplementary material for: Molecular pathway activation features of pediatric acute myeloid leukemia (AML) and acute lymphoblast leukemia (ALL) cells
Source: Aging (Albany NY). 2016 Nov 19;8(11):2936–46. doi: 10.18632/aging.101102 (PMC5182073; doi:10.18632/aging.101102)
Supplement: Supplementary file 7 [file aging-08-2936-s007.xlsx]

## Sheet: ALL_AML_Norm_CNR markers
Gene name	MeanCNR (ALL)	Mean CNR (AML)	Mean CNR (Norm)	AUC_value
AATK	1.719	1.678	1	0.870748
ABI1	0.598	0.474	1	0.918367
ACTA1	1.567	2.628	1	0.866213
ADCY6	2.773	2.463	1	0.857143
AKT2	1.522	1.835	1	0.852608
ANAPC2	2.693	3.039	1	0.904762
ANAPC4	2.206	3.315	1	0.945578
BAD	1.332	2.007	1	0.984127
BMP4	1.559	2.003	1	0.891156
BMP8A	1.479	1.765	1	0.895692
BRF1	1.497	1.748	1	0.852608
CACNA2D4	1.196	1.714	1	0.870748
CACNB1	1.432	1.643	1	0.866213
CACNB2	1.496	0.782	1	0.884354
CAMK2B	1.702	1.798	1	0.884354
CASP2	1.821	2.374	1	0.857143
CBL	1.361	2.238	1	0.931973
CCL14	0.718	0.605	1	0.873016
CCL27	1.429	1.318	1	0.877551
CCNB1	0.683	1.233	1	0.85941
CCR3	1.322	2.252	1	0.866213
CCR6	0.53	1.713	1	0.857143
CDC16	1.468	1.415	1	0.863946
CDK16	1.256	1.56	1	0.888889
CDKN1A	1.555	2.319	1	0.85941
CDKN2A	0.893	1.967	1	0.85941
CHRNA2	1.528	0.95	1	0.852608
CHRNG	4.272	4.636	1	0.882086
CHUK	0.496	0.797	1	0.870748
COL13A1	1.476	0.825	1	0.852608
COL5A2	0.367	0.781	1	0.909297
COL8A1	1.392	2.128	1	0.902494
CREM	0.431	0.58	1	0.870748
CXCL11	0.685	0.591	1	0.882086
CXCL12	0.914	1.447	1	0.891156
CYP17A1	1.107	2.192	1	0.857143
DBT	0.725	0.652	1	0.852608
DCC	0.525	0.672	1	0.857143
DKK1	0.286	1.685	1	0.891156
ECM2	0.683	0.458	1	0.952381
ELF1	0.68	0.571	1	0.884354
ERBB3	1.445	1.769	1	0.873016
F2	0.742	0.509	1	0.909297
FGF10	1.27	1.74	1	0.943311
FGF14	0.306	0.59	1	0.931973
FGF18	1.353	2.378	1	0.938776
FGF2	0.579	0.859	1	0.85941
FGF23	0.483	0.558	1	0.897959
FGF5	0.339	0.812	1	0.877551
FGF6	0.567	0.587	1	0.85034
FGF9	0.533	0.603	1	0.904762
FLT1	0.257	0.157	1	0.85034
FOXO3	1.365	1.743	1	0.907029
FRZB	0.909	0.506	1	0.857143
FZD3	0.372	0.702	1	0.895692
GAB1	1.545	2.307	1	0.857143
GABRA5	1.376	2.091	1	0.931973
GABRG3	0.785	0.728	1	0.897959
GAS1	0.593	0.511	1	0.895692
GDF15	0.601	0.404	1	0.85941
GDF2	0.884	0.569	1	0.863946
GNA13	0.303	0.384	1	0.904762
GNB2L1	0.533	2.369	1	0.938776
GNG13	0.717	1.709	1	0.852608
GNG8	0.67	0.72	1	0.852608
GRIA3	1.414	1.813	1	0.877551
GRIK1	1.441	1.644	1	0.85034
GRM7	1.256	2.086	1	0.922902
H3F3B	0.67	0.719	1	0.857143
HAPLN1	0.611	0.575	1	0.863946
HBEGF	0.696	0.635	1	0.886621
HIST1H3F	1.804	3.154	1	0.904762
HIST1H3G	1.349	3.072	1	0.888889
HIST1H3J	0.34	0.488	1	0.909297
HLA-DMA	1.11	1.675	1	0.85941
HLA-DOB	0.729	0.85	1	0.852608
HLA-DQA1	0.548	0.578	1	0.877551
HNF4A	0.782	0.42	1	0.909297
IFNA14	0.581	0.354	1	0.927438
IFNG	0.526	0.736	1	0.909297
IGF2	1.374	2.549	1	0.954649
IKBKG	0.469	0.577	1	0.911565
IL12RB2	0.583	0.559	1	0.854875
IL7	0.835	0.563	1	0.904762
IL7R	0.628	0.69	1	0.895692
INS	1.354	2.082	1	0.93424
ITGA1	0.702	0.501	1	0.861678
ITGA10	0.783	0.593	1	0.861678
ITGAV	0.618	0.388	1	0.852608
ITGB7	1.58	2.411	1	0.947846
ITPR2	1.195	1.787	1	0.929705
JAK1	0.399	0.575	1	0.950113
JUN	0.572	0.871	1	0.863946
JUND	0.406	2.377	1	0.92517
KCNK3	1.248	1.712	1	0.904762
KDELR3	0.816	0.521	1	0.85941
KDR	1.427	2.032	1	0.888889
KLRC3	0.505	0.557	1	0.863946
KRAS	1.644	2.649	1	0.873016
LAMA3	0.745	1.238	1	0.875283
LAMA5	0.461	0.745	1	0.868481
LAMB4	0.375	0.466	1	0.909297
LAMTOR3	0.772	0.514	1	0.85941
LIPE	0.769	0.382	1	0.918367
LMTK2	0.708	0.487	1	0.884354
MAPK11	0.583	0.767	1	0.85034
MAPK13	0.53	0.577	1	0.870748
MAPK4	1.399	1.921	1	0.950113
MAPK6	0.526	0.539	1	0.857143
MAPK8	1.359	1.87	1	0.895692
MED1	0.7	0.609	1	0.866213
MITF	1.807	2.392	1	0.893424
MMP10	0.844	0.532	1	0.911565
MMP14	1.125	1.736	1	0.893424
MMP3	0.755	0.466	1	0.85034
MYH13	0.753	0.575	1	0.852608
MYH3	1.356	1.946	1	0.927438
MYH9	0.637	0.779	1	0.873016
MYL9	1.258	1.796	1	0.911565
NCOA1	1.389	1.83	1	0.852608
NCOA2	1.365	0.821	1	0.873016
PARP10	0.922	1.298	1	0.852608
PARP9	0.661	0.474	1	0.877551
PELP1	1.297	1.951	1	0.888889
PER2	0.861	0.491	1	0.879819
PER3	0.687	0.333	1	0.873016
PF4	0.182	0.282	1	0.888889
PFKM	0.754	0.451	1	0.918367
PIM1	0.774	0.414	1	0.857143
PKIA	0.348	0.344	1	0.870748
POLR1B	1.406	2.009	1	0.879819
POU2F1	0.93	1.291	1	0.857143
PPARA	1.251	1.605	1	0.861678
PPP1R2	0.741	0.596	1	0.891156
PPP1R3B	0.733	0.528	1	0.879819
PPP1R3C	0.836	0.439	1	0.918367
PPP2R1A	1.369	1.171	1	0.861678
PROK1	0.894	0.639	1	0.884354
PSEN1	0.825	0.517	1	0.945578
PSMA7	1.814	1.247	1	0.893424
PTPN11	0.693	0.45	1	0.863946
PYGO2	1.918	1.515	1	0.931973
RAC3	2.788	2.175	1	0.918367
RAPGEF3	1.377	1.547	1	0.918367
RET	1.399	2.351	1	0.879819
RGS14	0.701	0.881	1	0.870748
RGS20	1.446	1.343	1	0.884354
RPTOR	0.777	0.623	1	0.93424
RXRB	0.824	0.398	1	0.870748
SAR1B	1.423	2.529	1	0.938776
SCNN1G	1.178	2.043	1	0.868481
SMAD9	0.428	0.274	1	0.9161
SOCS5	2.127	1.838	1	0.852608
SPOCK1	1.79	1.316	1	0.922902
SPP1	0.546	0.731	1	0.893424
TAB1	1.081	2.293	1	0.875283
TAF15	1.28	1.733	1	0.854875
TIE1	1.469	2.119	1	0.929705
TLR9	1.512	1.948	1	0.854875
TNFSF14	2.286	2.8	1	0.895692
TUBB2A	1.345	0.665	1	0.852608
UBE2L6	1.677	1.391	1	0.920635
UBE2Q1	1.44	0.744	1	0.852608
UBR2	1.097	0.556	1	0.857143
UBTF	1.845	1.13	1	0.85941
USP20	1.762	1.214	1	0.861678
USP21	2.459	2.144	1	0.888889
USP25	1.939	0.712	1	0.852608
USP29	1.487	1.849	1	0.863946
WIF1	1.569	2.164	1	0.857143
WNT5B	1.387	1.721	1	0.861678
WNT7B	1.754	1.582	1	0.861678

## Sheet: ALL_AML_Norm_PAS markers
Pathway name	Mean PAS (ALL)	Mean PAS (AML)	Mean PAS (Norm)	AUC_value
Akt_Signaling_Pathway_Splicing_Regulation	0.214	0.348	0	0.882086
Akt_Signaling_Pathway_Synaptic_Transmission	-0.114	0.047	0	0.848073
ATM_Pathway_Apoptosis_and_Senescence	0.039	0.138	0	0.84127
ATM_Pathway_Cell_Cycle_Checkpoint_Control	0.282	0.36	0	0.852608
ATM_Pathway_Cell_Survival	-0.109	0.106	0	0.852608
CD40_Pathway_Cell_Survival	-0.057	-0.279	0	0.863946
CREB_Pathway	-0.035	0.051	0	0.868481
EGF_Pathway_IP3_Signaling	-0.271	-0.493	0	0.891156
EGF_Pathway_Rab5_Regulation_Pathway	-0.315	-0.454	0	0.848073
Estrogen_Pathway	-0.079	0.003	0	0.84127
Glucocorticoid_Receptor_Signaling_Pathway_Cell_Cycle_Progression	0.335	0.156	0	0.941043
Glucocorticoid_Receptor_Signaling_Pathway_Gene_Expression_via_CREB3_STAT5B_SLC22A2_POU2F1	0.263	0.144	0	0.959184
GPCR_Pathway	-0.076	0.013	0	0.845805
Hedgehog_Signaling_in_Mammals_no_Tubulin_Pathway	-0.329	-0.183	0	0.897959
HGF_Pathway_Regulation_of_Cytoskeleton_Cell_Polarity_and_Cell_Motility	0.173	0.113	0	0.911565
HIF1Alpha_Pathway_HIF1a_Degradation	-0.58	-0.193	0	0.893424
HIF1Alpha_Pathway_p53_Hypoxia_Pathway	0.189	0.088	0	0.852608
IGF1R_Signaling_Pathway_Protein_Synthesis	0.242	0.105	0	0.904762
ILK_Signaling_Pathway_Cell_Adhesion	0.218	0.359	0	0.900227
ILK_Signaling_Pathway_Opsonization	0.185	0.318	0	0.929705
IP3_Pathway_Gene_Expression_via_CREB3_NFATC2_MEF2D	0.026	0.145	0	0.85034
Mitochondrial_Apoptosis_Pathway_DNA_Fragmentation	-0.098	-0.148	0	0.879819
PPAR_Pathway_Adipocyte_Differentiation_Glucose_Homeostasis_and_Macrophage_Function	0.067	0.352	0	0.954649
Ras_Pathway	-0.071	0.008	0	0.848073
Ras_Pathway_CDC42_Pathway	0.234	0.336	0	0.870748
Ras_Pathway_Gene_Expression_Cell_Proliferation_Cell_Survival_Differentiation_Development_Cell_Cycle_Control_Cell_Motility_Tumorigenesis_via_ELK4_ATF2_MEF2D_STAT2_CREB3_CCNA1_MYC_ELK1_JUN_CDK4	-0.096	0.034	0	0.861678
Ras_Pathway_Receptor_Endocytosis	0.203	0.272	0	0.897959
TNF_Signaling_Pathway	0.025	0.136	0	0.891156
TNF_Signaling_Pathway_Apoptosis	0.222	0.323	0	0.893424
TNF_Signaling_Pathway_Gene_Expression_and_Cell_Survival_via_FOS_NFKB2_JUN_ELK1_ATF6	-0.16	-0.014	0	0.877551
TRAF_Pathway_Apoptosis	0.385	0.358	0	0.882086
VEGF_Pathway_Focal_Adhesion_Turnover	0.279	0.121	0	0.843537
WNT_Pathway	-0.064	-0.008	0	0.861678
WNT_Pathway_Cell_Survival	-0.199	-0.081	0	0.877551
WNT_Pathway_Gene_Expression_via_CREB3	-0.179	-0.059	0	0.875283
WNT_Pathway_PKC_Pathway	-0.211	-0.068	0	0.895692
