# Supplementary material for: Molecular pathway activation features of pediatric acute myeloid leukemia (AML) and acute lymphoblast leukemia (ALL) cells
Source: Aging (Albany NY). 2016 Nov 19;8(11):2936–46. doi: 10.18632/aging.101102 (PMC5182073; doi:10.18632/aging.101102)
Supplement: Supplementary file 8 [file aging-08-2936-s008.xlsx]

## Sheet: AML_ALL_PAS markers
Pathway name	Mean PAS (ALL)	Mean PAS (AML)	AUC_value
ATM_Pathway_Cell_Survival	-0.109	0.106	0.938776
ATM_Pathway_DNA_repair	0	0.135	0.918367
cAMP_Pathway_Axonal_Growth	0.047	-0.162	0.918367
cAMP_Pathway_Cell_Growth	-0.033	0.126	0.938776
cAMP_Pathway_Chemotaxis	-0.041	0.117	0.959184
cAMP_Pathway_Cytokine_Production	-0.067	0.093	0.959184
cAMP_Pathway_Fatty_Acid_Metabolism	-0.062	0.109	1
Chemokine_Pathway_Internalization_Degradation_Recycling	-0.15	0.085	0.918367
CREB_Pathway	-0.035	0.051	0.938776
Estrogen_Pathway	-0.079	0.003	1
Estrogen_Pathway_Gene_Expression_via_FOS_JUN_ELK1_SP1_POLR2B_CREB3_NFKB2	-0.112	-0.033	0.918367
Glucocorticoid_Receptor_Signaling_Pathway_Cell_Cycle_Progression	0.335	0.156	0.918367
GPCR_Pathway	-0.076	0.013	0.918367
Hedgehog_Signaling_in_Mammals_Pathway	-0.054	0.132	1
HIF1Alpha_Pathway_Gene_Expression_via_JUN_CREB3	-0.171	0.039	0.918367
HIF1Alpha_Pathway_HIF1a_Degradation	-0.58	-0.193	0.918367
IL-2_Pathway_IL2_Gene_Expression_via_POLR1E_EGR1_HMGA1_ELF1_POU2F1_MYC	-0.141	-0.02	0.918367
ILK_Signaling_Pathway_Induced_Cell_Proliferation	0.064	0.273	0.918367
ILK_Signaling_Pathway_MMP2_MMP9_Gene_Expression_Tissue_Invasion_via_FOS	-0.085	0.102	0.979592
IP3_Pathway	-0.083	0.011	0.938776
IP3_Pathway_Gene_Expression_via_CREB3_NFATC2_MEF2D	0.026	0.145	0.979592
MAPK_Signaling_Pathway_Cell_Motility_Inflammation_Apoptosis_Osmoregulation	-0.17	0.002	0.918367
MAPK_Signaling_Pathway_Cell_Survival	-0.068	0.306	0.959184
Notch_Signaling_Pathway_gamma_Secretase	0.271	0.001	0.979592
PPAR_Pathway_Adipocyte_Differentiation_Glucose_Homeostasis_and_Macrophage_Function	0.067	0.352	0.959184
RANK_Signaling_in_Osteoclasts_Pathway	0.019	0.152	0.918367
Ras_Pathway_Gene_Expression_Cell_Proliferation_Cell_Survival_Differentiation_Development_Cell_Cycle_Control_Cell_Motility_Tumorigenesis_via_ELK4_ATF2_MEF2D_STAT2_CREB3_CCNA1_MYC_ELK1_JUN_CDK4	-0.096	0.034	0.918367
SMAD_Signaling_Network_Pathway	-0.016	0.057	0.979592
TNF_Signaling_Pathway	0.025	0.136	0.959184
TNF_Signaling_Pathway_Gene_Expression_and_Cell_Survival_via_FOS_NFKB2_JUN_ELK1_ATF6	-0.16	-0.014	0.918367
Ubiquitin-Proteasome_Dependent_Proteolysis_Pathway	0.155	0.019	0.938776
VEGF_Pathway_Focal_Adhesion_Turnover	0.279	0.121	0.959184
WNT_Pathway	-0.064	-0.008	0.918367
WNT_Pathway_Cell_Survival	-0.199	-0.081	0.918367

## Sheet: AML_ALL_CNR markers
Gene name	Mean CNR (ALL)	Mean CNR (AML)	AUC_value
ATF4	1.168	2.191	0.918367
BAD	1.332	2.007	1
CACNB2	1.496	0.782	0.938776
CAMKK2	1.152	1.826	0.959184
CBL	1.361	2.238	0.938776
CCL28	1.118	0.83	0.938776
CCNB1	0.683	1.233	0.959184
CCNF	1.159	1.841	0.918367
CDH26	0.998	1.708	0.979592
CDH4	0.964	1.908	0.918367
CDKN2A	0.893	1.967	0.959184
CHRNA2	1.528	0.95	0.938776
COL13A1	1.476	0.825	0.938776
COL27A1	0.967	1.452	0.959184
COL5A2	0.367	0.781	0.918367
COL6A3	0.676	1.077	0.959184
COPS5	0.841	1.667	0.938776
CSNK1A1	1.077	1.813	0.918367
CXCL12	0.914	1.447	0.959184
CXCR6	1.068	1.623	0.959184
DDR2	1.054	0.747	0.918367
DKK1	0.286	1.685	0.959184
EP300	1.032	1.885	0.918367
EPHB4	1.021	0.73	0.959184
F2	0.742	0.509	0.918367
F2RL3	0.971	1.719	0.959184
FCGR1A	1.19	0.913	0.938776
FGF14	0.306	0.59	0.938776
FGF18	1.353	2.378	0.959184
FGF19	1.05	1.681	0.938776
FGF2	0.579	0.859	0.959184
FGF5	0.339	0.812	0.918367
FOSL1	0.961	1.408	1
FRZB	0.909	0.506	1
FZD2	0.856	1.282	0.959184
GABRA5	1.376	2.091	0.938776
GABRE	1.039	1.971	0.938776
GH2	1.176	0.793	0.959184
GNAQ	0.527	1.028	0.918367
GNB2	0.574	1.032	0.959184
GNB2L1	0.533	2.369	0.959184
GNB3	0.84	1.15	0.938776
GNG13	0.717	1.709	0.938776
GNRH1	1.012	2.259	0.959184
GRM1	0.749	1.157	0.938776
GRM5	0.982	1.867	0.918367
GRM7	1.256	2.086	0.959184
HAPLN4	0.443	0.933	0.918367
HDAC3	1.166	0.871	0.918367
HLA-DMA	1.11	1.675	0.959184
HLA-DOB	0.729	0.85	0.938776
HNF4A	0.782	0.42	0.918367
HSPA1A	0.104	0.798	0.938776
IFNB1	0.694	1.021	1
IFNG	0.526	0.736	0.918367
IGF2	1.374	2.549	0.959184
ITGAV	0.618	0.388	0.938776
ITGB7	1.58	2.411	0.938776
ITPR2	1.195	1.787	0.979592
JUND	0.406	2.377	0.918367
KDELR1	0.762	0.36	0.918367
KDELR3	0.816	0.521	0.959184
KLF10	1.062	2.339	0.938776
LAMA3	0.745	1.238	0.959184
LAMA5	0.461	0.745	0.938776
MAP3K7	0.901	1.997	0.918367
MAPT	1.335	0.66	0.938776
MMP14	1.125	1.736	0.918367
MST1R	1.493	0.913	0.959184
NCOA2	1.365	0.821	1
NFAT5	0.991	2.532	0.938776
PARP10	0.922	1.298	0.938776
PARP3	0.633	0.958	0.979592
PARVA	1.04	1.364	0.918367
PIK3R1	1.082	1.739	0.918367
PLCZ1	1.09	0.514	0.918367
PLD2	1.485	0.812	0.918367
PLS3	1.06	0.647	0.918367
PMS2	0.776	1.095	0.938776
PPP1R9B	1.188	0.639	0.918367
PPP2R3B	1.332	0.882	0.938776
PROK1	0.894	0.639	0.938776
PSEN1	0.825	0.517	0.979592
PSMA2	1.172	0.51	0.918367
PSMA4	1.445	0.564	0.918367
PSMA6	1.844	1.02	0.918367
PSMA7	1.814	1.247	0.918367
RGS10	1.088	0.851	0.938776
RGS16	1.161	0.775	0.938776
RGS4	1.134	1.943	0.918367
RRAS	1.056	0.702	0.918367
RRAS2	1.026	0.856	0.959184
RRM2	0.976	0.666	0.918367
SAR1B	1.423	2.529	0.959184
SCNN1G	1.178	2.043	0.938776
SMC3	0.863	1.577	0.938776
SOS1	1.593	0.765	0.959184
SOS2	1.781	1.043	0.938776
SPOCK1	1.79	1.316	0.959184
SPOCK2	1.726	0.911	0.938776
TAB1	1.081	2.293	0.959184
TBRG1	1.1	0.783	0.959184
TEK	0.994	0.549	0.938776
TGFA	1.291	0.721	0.938776
TGFBR1	0.987	0.611	0.918367
TMSB4Y	2.263	1.038	0.938776
TNFRSF10A	1.279	0.549	0.918367
TNFRSF11A	1.488	0.88	0.918367
TNFSF13B	1.162	0.781	0.959184
TNFSF9	1.574	0.983	0.918367
TRAF6	1.081	0.583	0.918367
TUBA8	1.891	1.103	0.918367
TUBB2A	1.345	0.665	0.938776
TUBB4B	0.96	0.643	0.959184
TUBGCP2	1.52	0.893	0.918367
TUBGCP3	1.389	1.03	0.959184
UBE2L3	1.48	0.749	0.918367
UBE2Q1	1.44	0.744	0.938776
UBE2T	1.457	0.929	0.959184
UBR5	1.054	0.629	0.918367
UBTF	1.845	1.13	0.959184
UCN	1.809	1.104	1
USP11	1.349	0.965	0.938776
USP12	1.051	0.54	0.938776
USP13	1.604	0.949	0.938776
USP14	0.886	0.62	0.938776
USP18	0.979	0.576	0.918367
USP19	0.632	0.351	0.938776
USP20	1.762	1.214	0.918367
USP25	1.939	0.712	0.938776
USP46	1.74	0.925	0.918367
USP6	1.041	0.597	0.979592
USP6NL	1.453	1.022	1
VCAN	1.091	0.528	1
VDAC2	1.081	0.531	0.959184
WNK1	1.607	1.036	0.979592
WNT1	1.211	0.902	0.938776
WNT16	2.015	1.202	0.918367
YWHAZ	1.265	0.703	0.938776
