# Supplementary material for: Molecular pathway activation features of pediatric acute myeloid leukemia (AML) and acute lymphoblast leukemia (ALL) cells
Source: Aging (Albany NY). 2016 Nov 19;8(11):2936–46. doi: 10.18632/aging.101102 (PMC5182073; doi:10.18632/aging.101102)
Supplement: Supplementary file 9 [file aging-08-2936-s009.xlsx]

## Sheet: Adult AML_CNR markers
Gene name	Mean CNR (adult AML)	AUC_value
ACVR1	0.208	0.776471
ACVRL1	1.257	0.756863
ADAM17	0.865	0.782353
ADRBK2	0.269	0.772549
AKAP11	0.842	0.822549
ATF7	0.564	0.819608
ATR	1.326	0.821569
ATXN1	0.722	0.766667
BCAP31	0.508	0.766667
BCL2L1	0.533	0.837255
BID	0.613	0.843137
BIRC3	1.434	0.884314
CACNG5	4.055	0.905882
CAMK2B	1.35	0.888235
CAPN9	0.707	0.845098
CARD10	0.708	0.798039
CASP4	0.631	0.852941
CCL2	1.356	0.811765
CCNT1	3.422	0.876471
CD27	10.073	0.827451
CDH2	0.807	0.803922
CDK2	1.356	0.876471
CDK7	1.403	0.823529
CHEK1	0.25	0.801961
CHRNA10	1.226	0.763725
CLCA1	1.286	0.754902
CLCN5	0.43	0.878431
COL17A1	0.776	0.771569
COL4A6	1.561	0.778431
COL5A2	1.317	0.756863
COL6A3	0.494	0.807843
CRY1	1.186	0.768627
CSK	0.53	0.75098
CSNK1G2	0.546	0.884314
CYP2C19	1.599	0.888235
DAAM2	1.198	0.753922
DAXX	1.229	0.847059
DDX17	1.419	0.82549
DUSP3	0.846	0.756863
DVL3	1.226	0.809804
ECM1	1.478	0.764706
EGR1	1.276	0.77549
EIF4B	1.14	0.772549
EPHA5	0.824	0.75098
EPHB2	0.789	0.833333
ESR2	0.817	0.777451
ETS1	0.403	0.866667
F2	1.821	0.772549
FBXW7	1.903	0.754902
FLT3LG	0.789	0.762745
FZD10	1.457	0.84902
GABRB1	1.552	0.768627
GNA12	0.857	0.756863
GNA14	1.531	0.907843
GNAS	1.215	0.805882
GNB3	5.422	0.84902
GRIA4	0.787	0.784314
GRK6	1.172	0.764706
GRM1	1.296	0.817647
GSN	0.514	0.796078
HAPLN1	0.724	0.760784
HIF1AN	0.732	0.821569
HIST1H3B	1.486	0.821569
HMGA1	0.807	0.766667
HTRA2	0.266	0.945098
IFNA2	1.612	0.75098
IGFBP4	1.142	0.855882
IL13	0.525	0.788235
IL15	1.16	0.784314
IL22	0.728	0.768627
IL23A	1.151	0.764706
IRS2	1.616	0.780392
IRS4	1.298	0.832353
ITGA3	1.511	0.913725
ITGAV	1.398	0.87451
JAK3	1.32	0.826471
LIPE	0.249	0.770588
MAP2K1	0.756	0.801961
MAP4K4	0.779	0.798039
MAPK12	0.727	0.790196
MAPK13	0.711	0.776471
MYD88	1.27	0.761765
MYH6	1.388	0.779412
NCOA1	1.253	0.778431
NET1	1.416	0.796078
NFAT5	0.633	0.762745
NOTCH2	1.23	0.770588
NPTN	0.626	0.8
NR0B1	0.565	0.780392
NR3C1	0.82	0.766667
PAK7	1.506	0.77549
PARP1	0.832	0.758824
PCNA	1.87	0.863725
PDGFA	0.696	0.754902
PDGFB	0.854	0.754902
PDGFD	0.658	0.786275
PIK3CA	0.591	0.817647
PLD2	0.635	0.792157
PMAIP1	0.78	0.77451
PPARA	0.704	0.788235
PPARD	1.311	0.792157
PPP1CB	0.711	0.854902
PPP1R1A	0.596	0.813725
PPP1R9A	1.503	0.798039
PPP2CB	1.594	0.819608
PRKAR1A	1.253	0.769608
PRKAR2B	1.249	0.798039
PSMA7	2.028	0.77451
RAD51	0.448	0.833333
RAP1A	0.746	0.778431
RAPGEF4	0.675	0.754902
RSU1	1.31	0.762745
RYR3	1.874	0.776471
SAR1B	1.448	0.832353
SEMA5A	1.247	0.768627
SLC2A4	1.476	0.817647
SMARCA1	0.715	0.823529
SMARCA4	0.854	0.776471
SMARCC2	1.626	0.854902
SOCS5	0.42	0.909804
SOS1	1.435	0.791176
STAT5A	0.584	0.943137
TCF7L1	1.52	0.792157
TGFBR1	1.475	0.776471
TLE3	0.504	0.882353
UBE2G1	1.31	0.783333
UBE3A	1.198	0.819608
UBE3B	1.575	0.803922
USP34	0.812	0.812745
VAV2	2	0.898039
VEGFA	0.849	0.77549
ZAP70	2.8	0.829412

## Sheet: Adult AML_PAS markers
Pathway name	Mean PAS (adult AML)	AUC_value
AHR_Pathway_Cath_D_expression_via_SP1	-0.065	0.75098
AHR_Pathway_PS2_Gene_expression_via_ESR1	-0.076	0.768627
ATM_Pathway	-0.057	0.760784
ATM_Pathway_Cell_Cycle_Checkpoint_Control	-0.101	0.760784
ATM_Pathway_S-phase_progression	-0.258	0.845098
cAMP_Pathway_Fatty_Acid_Metabolism	0.05	0.772549
cAMP_Pathway_Metabolic_Energy	-0.069	0.768627
CD40_Pathway_Cell_Survival	-0.201	0.784314
EGF_Pathway_Cell_Survival	-0.114	0.782353
Erythropoietin_Pathway_BCLXL_Gene_Expression_via_STAT5B	-0.136	0.75098
FLT3_Signaling_Pathway	-0.053	0.794118
FLT3_Signaling_Pathway_Transcription_via_ELK3_MAPK12_CREB3_STAT2	-0.056	0.77451
Glucocorticoid_Receptor_Signaling_Pathway_Cell_Cycle_Progression	0.066	0.752941
HGF_Pathway	-0.062	0.833333
HGF_Pathway_Anoikis	-0.142	0.864706
HGF_Pathway_Cell_Adhesion_and_Cell_Migration	-0.065	0.778431
HIF1Alpha_Pathway_HIF1a_Degradation	-0.579	0.77451
IL-10_Pathway_IL-10_Responsive_Genes_Transcription_of_BCLXL_Cyclin-D1_D2_D3_Pim1_c-Myc_and_P19(INK4D)_via_STAT3	-0.085	0.768627
ILK_Signaling_Pathway_Cell_Cycle_Proliferation	-0.064	0.813725
ILK_Signaling_Pathway_Cell_Migration_Retraction	-0.073	0.833333
JAK-STAT_Pathway	-0.021	0.798039
JAK-STAT_Pathway_Nml_SOCS_BCL-XL_p21_Myc_Nos2_Gene_Expression_via_STAT2	-0.025	0.794118
MAPK_Family_Pathway_Cytoskeleton	-0.179	0.768627
Mitochondrial_Apoptosis_Pathway_Apoptosis	-0.09	0.77451
NGF_Pathway_Neurite_Outgrowth_and_Differentiation	-0.082	0.752941
PPAR_Pathway	-0.05	0.833333
Ras_Pathway_CDC42_Pathway	0.267	0.77451
Ras_Pathway_Increased_T-cell_Adhesion	-0.072	0.762745
TGF-Beta_Pathway	-0.021	0.768627
VEGF_Pathway	-0.04	0.75098
WNT_Pathway	0.023	0.839216
WNT_Pathway_Cytoskeletal_Rearrangement	0.237	0.776471
WNT_Pathway_Gene_Expression_via_CREB3	0.09	0.782353
